# Supplementary material for: Phenothiazines Rapidly Induce Laccase Expression and Lignin-Degrading Properties in the White-Rot Fungus Phlebia radiata
Source: MDPI journal article supplement (doi:10.3390/jof9030371), 2023-03-18
Supplement: s1 [file s1]

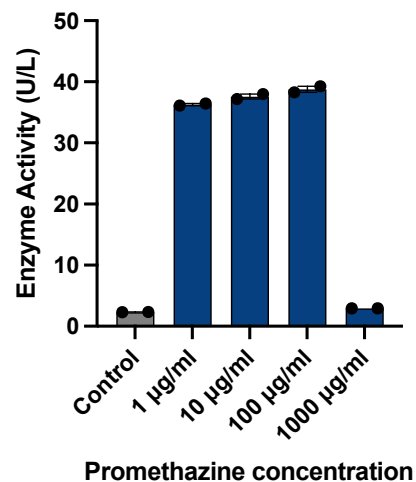

**Supplementary Figure S1. Titration of promethazine concentrations and the induction of laccase activity in *P. radiata*.** *P. radiata* mycelia were grown in liquid YNB + 2% glucose media and treated with different amounts of promethazine to identify concentrations that induce laccase activity. Control cells were not treated with promethazine. Laccase activity in the media supernatant was measured 3 days post-treatment using ABTS oxidation assays. Bars represent the mean of 2 biological replicates, with individual data points shown, and error bars represent standard error of the mean.

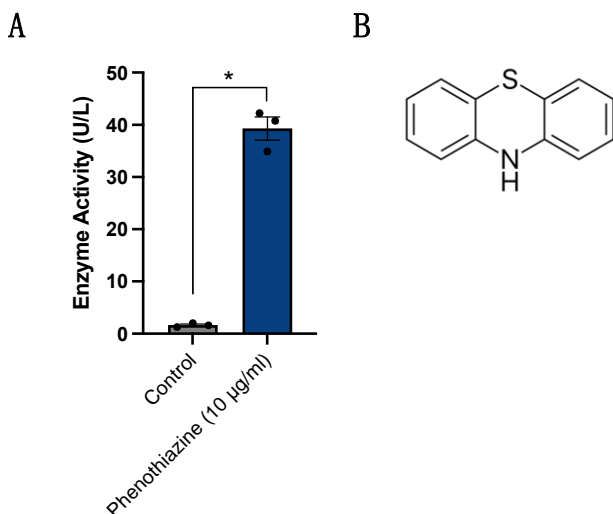

**Supplementary Figure S2. Testing the ability of phenothiazine to induce laccase activity in *P. radiata*.** The chemical phenotype microarray screen identified several phenothiazine derivatives as inducers of laccase activity in *P. radiata*. **(A)** Here, the phenothiazine backbone itself was tested for its ability to induce laccase activity. *P. radiata* was treated with phenothiazine and laccase activity was measured 2 days post-treatment using ABTS oxidation assays. Bars represent the mean of 3 biological replicates, with individual data points shown, and error bars represent standard error of the mean. Statistical significance is denoted by \* for  $P < 0.01$ . **(B)** Chemical structure of phenothiazine for reference.

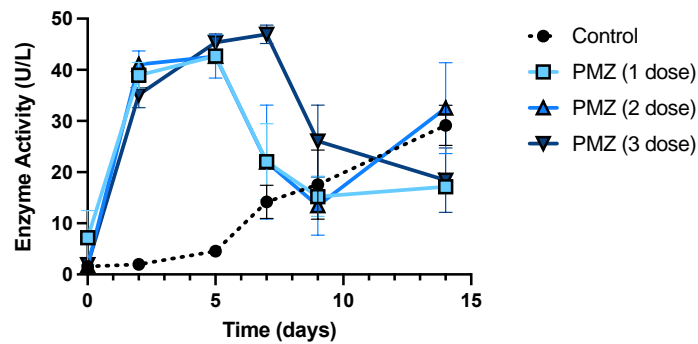

**Supplementary Figure S3. Sequential doses of promethazine and prolonged laccase activity by *P. radiata*.** Time-course studies of laccase induction by promethazine revealed a peak in laccase activity between 2-5 days post-treatment, followed by a decline in laccase activity. Here, we tested whether sequential exposures to promethazine could prolong laccase activity in media supernatants by treating *P. radiata* with either 1, 2 or 3 doses of promethazine during the time-course. *P. radiata* cultures receiving 1 dose were only exposed to promethazine on day 0. *P. radiata* cultures receiving 2 doses received promethazine treatment on day 0 and day 2, and cultures receiving 3 doses received promethazine treatment on day 0, day 2 and day 5. Control cells were not exposed to promethazine. Data points represent the mean of three biological replicates and error bars represent the standard deviation.

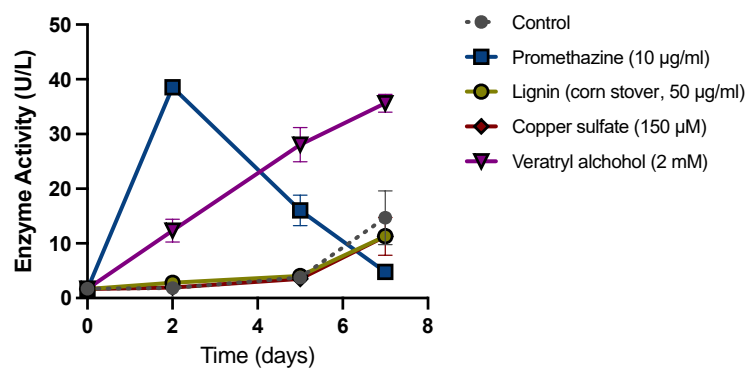

**Supplementary Figure S4. Time-course analysis of laccase induction resulting from promethazine treatment or other known laccase-inducing compounds.** Laccase activity assays were performed on media samples collected from 20 ml *P. radiata* cultures grown in YNB + 2% glucose at multiple timepoints post-promethazine treatment. For all induction tests, the final induction solution represented 0.1% of the total culture volume. Data points represent the mean of n=3 biological replicates and error bars represent the standard error of the mean.

**A**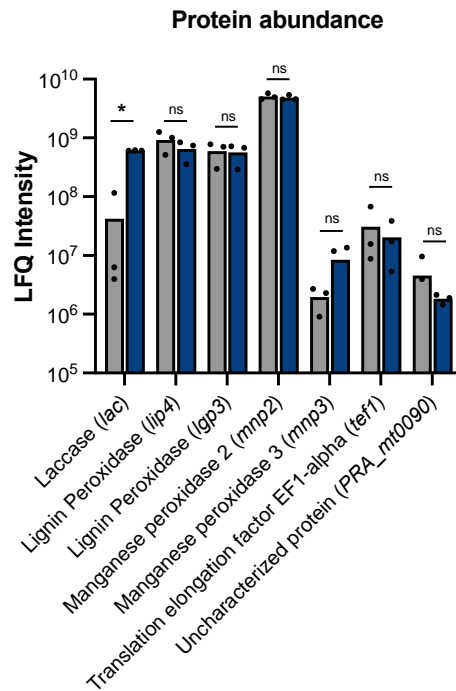**B**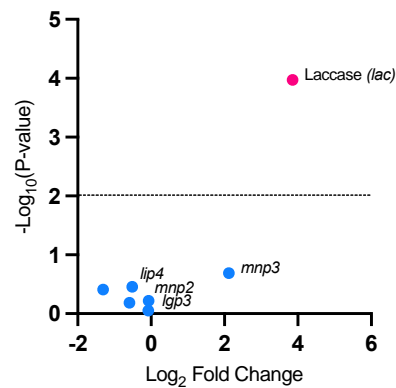

**Supplementary Figure S5. Proteomics analyses of *P. radiata* secreted proteins in response to promethazine-treatment.** (A) The abundance of proteins identified in *P. radiata* conditioned media were measured at 2-days post-promethazine treatment using label-free quantitative proteomics analysis. Bars represent the mean of n=3 biological replicates with individual data points shown (\* denotes  $P < 0.01$ , and “ns” denotes not significant). (B) Volcano plot depicting differential protein expression analysis of promethazine-treated vs. non-treated controls. Only proteins with known functions in wood-degradation are labeled on the plot for clarity. Red dots represent statistically significant differential protein expression (fold-change  $> 2$  and  $P < 0.01$ ), and blue dots represent not statistically significant. The dotted line is added for reference of  $P = 0.01$ .

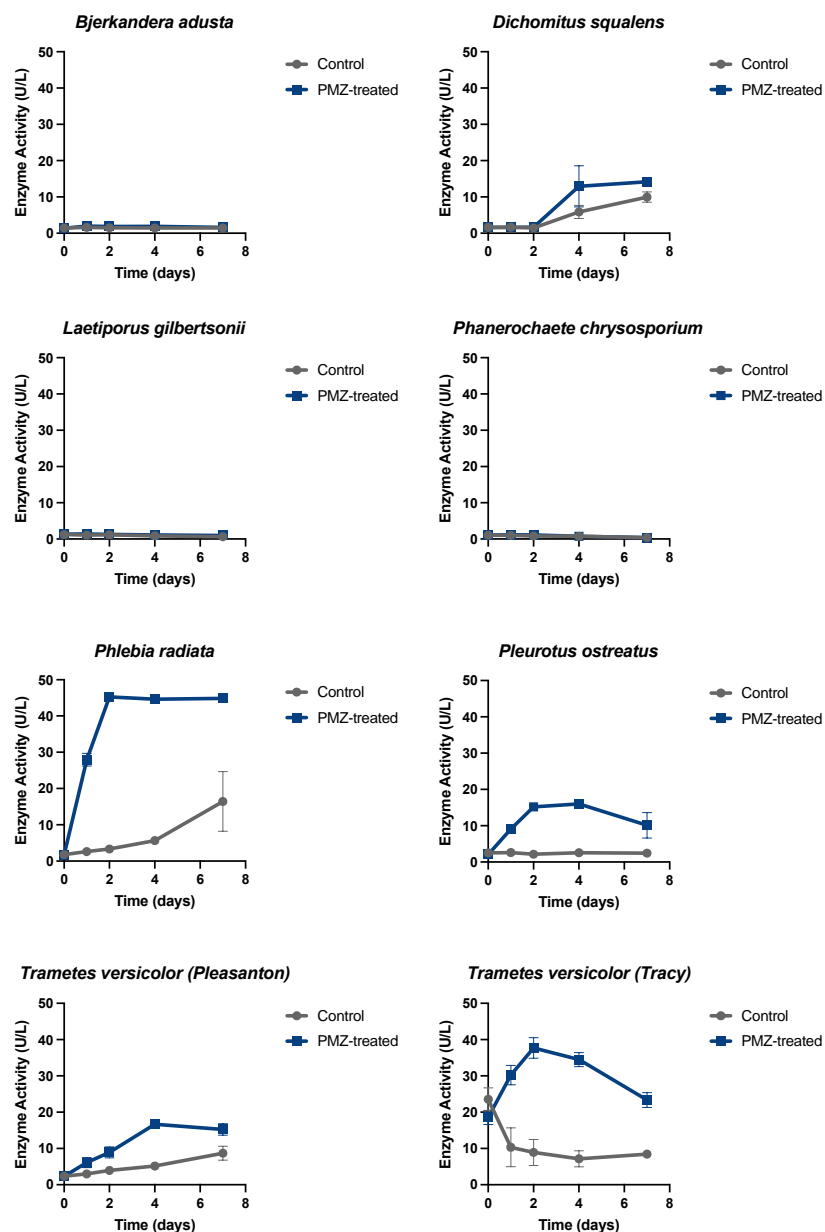

**Supplementary Figure S6. Multi-species time-course examination of laccase activity in response to promethazine treatment.** Laccase activity in media supernatants were measured from diverse fungal species +/- promethazine treatment. Samples were analyzed for extracellular laccase activity at 0, 1, 2, 4 and 7-days post-treatment using ABTS oxidation assays. Data points represent the mean of n = 3 biological replicates and error bars depict the standard error of the mean.

| PM Plate | Wells     | Chemical                          |
|----------|-----------|-----------------------------------|
| PM21D    | A 01 - 04 | Guanidine hydrochloride           |
| PM21D    | A 05 - 08 | 2,2'-Dipyridyl                    |
| PM21D    | A 09 - 12 | Promethazine                      |
| PM21D    | B 01 - 04 | Nystatin                          |
| PM21D    | B 05 - 08 | Dodecyltrimethyl ammonium bromide |
| PM21D    | B 09 - 12 | Protamine sulfate                 |
| PM21D    | C 01 - 04 | Cetylpyridinium chloride          |
| PM21D    | C 05 - 08 | Domiphen bromide                  |
| PM21D    | C 09 - 12 | L-Aspartic acid b-hydroxamate     |
| PM21D    | D 01 - 04 | Pyrithione                        |
| PM21D    | D 05 - 08 | EDTA                              |
| PM21D    | D 09 - 12 | Sodium dichromate                 |
| PM21D    | E 01 - 04 | Compound 48/80                    |
| PM21D    | E 05 - 08 | Manganese(II) chloride            |
| PM21D    | E 09 - 12 | Magnesium chloride                |
| PM21D    | F 01 - 04 | Copper(II) sulfate                |
| PM21D    | F 05 - 08 | Neomycin                          |
| PM21D    | F 09 - 12 | D-Cycloserine                     |
| PM21D    | G 01 - 04 | Sodium selenite                   |
| PM21D    | G 05 - 08 | Nickel(II) chloride               |
| PM21D    | G 09 - 12 | Trifluoperazine                   |
| PM21D    | H 01 - 04 | Diamide                           |
| PM21D    | H 05 - 08 | Thiourea                          |
| PM21D    | H 09 - 12 | Zinc chloride                     |
| PM22D    | A 01 - 04 | L-Glutamic acid g-monohydroxamate |
| PM22D    | A 05 - 08 | Sodium Metavanadate               |
| PM22D    | A 09 - 12 | Caffeine                          |
| PM22D    | B 01 - 04 | L-Arginine hydroxamate            |
| PM22D    | B 05 - 08 | Glycine hydroxamate               |
| PM22D    | B 09 - 12 | Triclosan                         |
| PM22D    | C 01 - 04 | 3-Amino-1,2,4-triazole            |
| PM22D    | C 05 - 08 | Miltefosine                       |
| PM22D    | C 09 - 12 | DL-Serine hydroxamate             |
| PM22D    | D 01 - 04 | Polymyxin B                       |
| PM22D    | D 05 - 08 | Urea hydrogen peroxide            |
| PM22D    | D 09 - 12 | Sodium arsenate                   |
| PM22D    | E 01 - 04 | CCCP                              |

|       |           |                           |
|-------|-----------|---------------------------|
| PM22D | E 05 - 08 | BAPTA                     |
| PM22D | E 09 - 12 | D-Serine                  |
| PM22D | F 01 - 04 | Azaserine                 |
| PM22D | F 05 - 08 | Lithium chloride          |
| PM22D | F 09 - 12 | FCCP                      |
| PM22D | G 01 - 04 | Benzamidine hydrochloride |
| PM22D | G 05 - 08 | Cycloheximide             |
| PM22D | G 09 - 12 | Thallium(I) acetate       |
| PM22D | H 01 - 04 | Bleomycin                 |
| PM22D | H 05 - 08 | Paromomycin               |
| PM22D | H 09 - 12 | Myclobutanil              |
| PM23A | A 01 - 04 | Benzethonium chloride     |
| PM23A | A 05 - 08 | Chlorpromazine            |
| PM23A | A 09 - 12 | Ammonium sulfate          |
| PM23A | B 01 - 04 | Cadmium chloride          |
| PM23A | B 05 - 08 | Dequalinium chloride      |
| PM23A | B 09 - 12 | Doxycycline               |
| PM23A | C 01 - 04 | Glycine hydrochloride     |
| PM23A | C 05 - 08 | Hydroxylamine             |
| PM23A | C 09 - 12 | Poly-L-lysine             |
| PM23A | D 01 - 04 | Chromium(III) chloride    |
| PM23A | D 05 - 08 | Cobalt(II) chloride       |
| PM23A | D 09 - 12 | Cupric(II) chloride       |
| PM23A | E 01 - 04 | Sodium metaborate         |
| PM23A | E 05 - 08 | Sodium metaperiodate      |
| PM23A | E 09 - 12 | Sodium metaarsenite       |
| PM23A | F 01 - 04 | Sodium azide              |
| PM23A | F 05 - 08 | Caprylic acid             |
| PM23A | F 09 - 12 | Sodium cyanate            |
| PM23A | G 01 - 04 | Sodium nitrite            |
| PM23A | G 05 - 08 | Sodium orthovanadate      |
| PM23A | G 09 - 12 | 2-Deoxy-D-glucose         |
| PM23A | H 01 - 04 | Sodium selenate           |
| PM23A | H 05 - 08 | Sodium cyanide            |
| PM23A | H 09 - 12 | Sodium thiosulfate        |
| PM24C | A 01 - 04 | Apramycin                 |
| PM24C | A 05 - 08 | 9-Aminoacridine           |
| PM24C | A 09 - 12 | Zaragozic acid A          |
| PM24C | B 01 - 04 | Blasticidin S             |

|       |           |                          |
|-------|-----------|--------------------------|
| PM24C | B 05 - 08 | Thioridazine             |
| PM24C | B 09 - 12 | Sodium benzoate          |
| PM24C | C 01 - 04 | Chlortetracycline        |
| PM24C | C 05 - 08 | Sodium metasilicate      |
| PM24C | C 09 - 12 | Pentamidine isethionate  |
| PM24C | D 01 - 04 | 6-Azauracil              |
| PM24C | D 05 - 08 | Potassium chromate       |
| PM24C | D 09 - 12 | Thialysine               |
| PM24C | E 01 - 04 | Berberine chloride       |
| PM24C | E 05 - 08 | EGTA                     |
| PM24C | E 09 - 12 | Sodium pyrophosphate     |
| PM24C | F 01 - 04 | Isoniazid                |
| PM24C | F 05 - 08 | Methyl viologen          |
| PM24C | F 09 - 12 | Sodium fluoride          |
| PM24C | G 01 - 04 | Cisplatin                |
| PM24C | G 05 - 08 | Aluminum sulfate         |
| PM24C | G 09 - 12 | Fluconazole              |
| PM24C | H 01 - 04 | Propiconazole            |
| PM24C | H 05 - 08 | Tamoxifen                |
| PM24C | H 09 - 12 | Miconazole               |
| PM25D | A 01 - 04 | Hydroxyurea              |
| PM25D | A 05 - 08 | Tobramycin               |
| PM25D | A 09 - 12 | Niaproof                 |
| PM25D | B 01 - 04 | b-Chloro-L-alanine       |
| PM25D | B 05 - 08 | Tetrazolium Violet       |
| PM25D | B 09 - 12 | Kanamycin                |
| PM25D | C 01 - 04 | 4-Aminopyridine          |
| PM25D | C 05 - 08 | Amitriptyline            |
| PM25D | C 09 - 12 | 4-Nitroquinoline N-oxide |
| PM25D | D 01 - 04 | Alexidine                |
| PM25D | D 05 - 08 | Hygromycin B             |
| PM25D | D 09 - 12 | 5-Fluorodeoxyuridine     |
| PM25D | E 01 - 04 | Sodium salicylate        |
| PM25D | E 05 - 08 | Succinic acid            |
| PM25D | E 09 - 12 | Clomiphene               |
| PM25D | F 01 - 04 | DL-Malic acid            |
| PM25D | F 05 - 08 | Tartaric acid            |
| PM25D | F 09 - 12 | Fumaric acid             |
| PM25D | G 01 - 04 | 5-Fluorocytosine         |

|       |           |                        |
|-------|-----------|------------------------|
| PM25D | G 05 - 08 | Palladium(II) chloride |
| PM25D | G 09 - 12 | Ibuprofen              |
| PM25D | H 01 - 04 | Chloroquine            |
| PM25D | H 05 - 08 | trans-Cinnamic acid    |
| PM25D | H 09 - 12 | 5-Fluorouracil         |

**Supplementary Table S1. Chemicals used in Phenotype Microarray Experiments and their locations in PM plates.** List of compounds tested using Biolog chemical sensitivity tests for fungi phenotype microarrays. Each chemical was tested across a range of 4 concentrations (exact concentrations are proprietary information of Biolog Inc.)
