# Supplementary material for: Phenothiazines Rapidly Induce Laccase Expression and Lignin-Degrading Properties in the White-Rot Fungus Phlebia radiata
Source: J Fungi (Basel). 2023 Mar 18;9(3):371. doi: 10.3390/jof9030371 (PMC10053029; doi:10.3390/jof9030371)
Supplement: Supplementary file 1 [file jof-09-00371-s001.zip › SupplementaryData_PhenotypeMicroarrayData.xlsx]

## Sheet: Growth
Plate	Well	Compound	OD600 (1)	OD600 (2)	OD600 (average)	Standard Deviation
PM21	A1	Guanidine hydrochloride	0.3672	0.4304	0.3988	0.0446891
PM21	A2	Guanidine hydrochloride	0.2811	0.3695	0.3253	0.0625082
PM21	A3	Guanidine hydrochloride	0.0487	0.0524	0.05055	0.0026163
PM21	A4	Guanidine hydrochloride	0.0442	0.0507	0.04745	0.00459619
PM21	A5	2,2`-Dipyridyl	0.5251	0.4253	0.4752	0.0705693
PM21	A6	2,2`-Dipyridyl	0.4949	0.434	0.46445	0.0430628
PM21	A7	2,2`-Dipyridyl	0.449	0.4198	0.4344	0.0206475
PM21	A8	2,2`-Dipyridyl	0.4191	0.4186	0.41885	0.000353553
PM21	A9	Promethazine	0.3557	0.3994	0.37755	0.0309006
PM21	A10	Promethazine	0.0577	0.0935	0.0756	0.0253144
PM21	A11	Promethazine	0.0603	0.116	0.08815	0.0393858
PM21	A12	Promethazine	0.1201	0.1404	0.13025	0.0143543
PM21	B1	Nystatin	0.0526	0.1062	0.0794	0.0379009
PM21	B2	Nystatin	0.0548	0.0797	0.06725	0.017607
PM21	B3	Nystatin	0.0512	0.1758	0.1135	0.0881055
PM21	B4	Nystatin	0.1107	0.1555	0.1331	0.0316784
PM21	B5	Dodecyltrimethyl ammonium bromide	0.2485	0.0506	0.14955	0.139936
PM21	B6	Dodecyltrimethyl ammonium bromide	0.0458	0.0478	0.0468	0.00141421
PM21	B7	Dodecyltrimethyl ammonium bromide	0.0457	0.048	0.04685	0.00162635
PM21	B8	Dodecyltrimethyl ammonium bromide	0.0464	0.0554	0.0509	0.00636396
PM21	B9	Protamine sulfate	0.0499	0.263	0.15645	0.150684
PM21	B10	Protamine sulfate	0.0469	0.0892	0.06805	0.0299106
PM21	B11	Protamine sulfate	0.0467	0.0484	0.04755	0.00120208
PM21	B12	Protamine sulfate	0.045	0.0491	0.04705	0.00289914
PM21	C1	Cetylpyridinium chloride	0.4521	0.4536	0.45285	0.00106066
PM21	C2	Cetylpyridinium chloride	0.045	0.2848	0.1649	0.169564
PM21	C3	Cetylpyridinium chloride	0.044	0.0743	0.05915	0.0214253
PM21	C4	Cetylpyridinium chloride	0.0444	0.0594	0.0519	0.0106066
PM21	C5	Domiphen bromide	0.363	0.3495	0.35625	0.00954594
PM21	C6	Domiphen bromide	0.0439	0.0493	0.0466	0.00381838
PM21	C7	Domiphen bromide	0.0462	0.0567	0.05145	0.00742462
PM21	C8	Domiphen bromide	0.0451	0.0614	0.05325	0.0115258
PM21	C9	L-Aspartic acid b-hydroxamate	0.2313	0.3774	0.30435	0.103308
PM21	C10	L-Aspartic acid b-hydroxamate	0.1928	0.3413	0.26705	0.105005
PM21	C11	L-Aspartic acid b-hydroxamate	0.1895	0.3514	0.27045	0.114481
PM21	C12	L-Aspartic acid b-hydroxamate	0.0946	0.3085	0.20155	0.15125
PM21	D1	Pyrithione	0.4838	0.4528	0.4683	0.0219203
PM21	D2	Pyrithione	0.408	0.433	0.4205	0.0176777
PM21	D3	Pyrithione	0.0691	0.0991	0.0841	0.0212132
PM21	D4	Pyrithione	0.0466	0.104	0.0753	0.0405879
PM21	D5	EDTA	0.3157	0.3036	0.30965	0.00855599
PM21	D6	EDTA	0.3406	0.3723	0.35645	0.0224153
PM21	D7	EDTA	0.3339	0.2823	0.3081	0.0364867
PM21	D8	EDTA	0.2347	0.3184	0.27655	0.0591848
PM21	D9	Sodium dichromate	0.0801	0.1446	0.11235	0.0456084
PM21	D10	Sodium dichromate	0.0497	0.0548	0.05225	0.00360624
PM21	D11	Sodium dichromate	0.0471	0.0506	0.04885	0.00247487
PM21	D12	Sodium dichromate	0.0453	0.0488	0.04705	0.00247487
PM21	E1	Compound 48/80	0.0471	0.0593	0.0532	0.0086267
PM21	E2	Compound 48/80	0.0483	0.0542	0.05125	0.00417193
PM21	E3	Compound 48/80	0.0475	0.0684	0.05795	0.0147785
PM21	E4	Compound 48/80	0.0472	0.0532	0.0502	0.00424264
PM21	E5	Manganese(II) chloride	0.3105	0.3631	0.3368	0.0371938
PM21	E6	Manganese(II) chloride	0.2929	0.3883	0.3406	0.067458
PM21	E7	Manganese(II) chloride	0.3543	0.4215	0.3879	0.0475176
PM21	E8	Manganese(II) chloride	0.4597	0.3297	0.3947	0.0919239
PM21	E9	Magnesium chloride	0.4576	0.4689	0.46325	0.00799031
PM21	E10	Magnesium chloride	0.3582	0.3139	0.33605	0.0313248
PM21	E11	Magnesium chloride	0.0496	0.0978	0.0737	0.0340825
PM21	E12	Magnesium chloride	0.0461	0.0473	0.0467	0.000848528
PM21	F1	Copper(II) sulfate	0.211	0.2629	0.23695	0.0366988
PM21	F2	Copper(II) sulfate	0.0438	0.0597	0.05175	0.011243
PM21	F3	Copper(II) sulfate	0.0603	0.0932	0.07675	0.0232638
PM21	F4	Copper(II) sulfate	0.0805	0.0585	0.0695	0.0155563
PM21	F5	Neomycin	0.0995	0.4526	0.27605	0.249679
PM21	F6	Neomycin	0.0446	0.3551	0.19985	0.219557
PM21	F7	Neomycin	0.0458	0.1027	0.07425	0.0402344
PM21	F8	Neomycin	0.0512	0.0642	0.0577	0.00919239
PM21	F9	D-Cycloserine	0.1895	0.3386	0.26405	0.10543
PM21	F10	D-Cycloserine	0.045	0.0533	0.04915	0.00586899
PM21	F11	D-Cycloserine	0.044	0.0989	0.07145	0.0388202
PM21	F12	D-Cycloserine	0.0465	0.0466	0.04655	7.07107e-05
PM21	G1	Sodium selenite	0.2923	0.5302	0.41125	0.168221
PM21	G2	Sodium selenite	0.2232	0.4524	0.3378	0.162069
PM21	G3	Sodium selenite	0.1994	0.2611	0.23025	0.0436285
PM21	G4	Sodium selenite	0.0922	0.1476	0.1199	0.0391737
PM21	G5	Nickel(II) chloride	0.5046	0.4532	0.4789	0.0363453
PM21	G6	Nickel(II) chloride	0.4802	0.4718	0.476	0.0059397
PM21	G7	Nickel(II) chloride	0.4777	0.4557	0.4667	0.0155563
PM21	G8	Nickel(II) chloride	0.1939	0.4065	0.3002	0.150331
PM21	G9	Trifluoperazine	0.0448	0.0494	0.0471	0.00325269
PM21	G10	Trifluoperazine	0.0442	0.054	0.0491	0.00692965
PM21	G11	Trifluoperazine	0.0445	0.0579	0.0512	0.00947523
PM21	G12	Trifluoperazine	0.0472	0.0526	0.0499	0.00381838
PM21	H1	Diamide	0.5168	0.4006	0.4587	0.0821658
PM21	H2	Diamide	0.5005	0.3894	0.44495	0.0785596
PM21	H3	Diamide	0.2268	0.361	0.2939	0.0948937
PM21	H4	Diamide	0.0459	0.0547	0.0503	0.00622254
PM21	H5	Thiourea	0.168	0.3049	0.23645	0.0968029
PM21	H6	Thiourea	0.0868	0.2104	0.1486	0.0873984
PM21	H7	Thiourea	0.0461	0.0638	0.05495	0.0125158
PM21	H8	Thiourea	0.0462	0.0483	0.04725	0.00148492
PM21	H9	Zinc chloride	0.6051	0.4131	0.5091	0.135765
PM21	H10	Zinc chloride	0.2472	0.0753	0.16125	0.121552
PM21	H11	Zinc chloride	0.1901	0.0937	0.1419	0.0681651
PM21	H12	Zinc chloride	0.1927	0.2524	0.22255	0.0422143
PM22	A1	L-Glutamic acid g-monohydroxamate	0.2425	0.3021	0.2723	0.0421436
PM22	A2	L-Glutamic acid g-monohydroxamate	0.0486	0.0697	0.05915	0.01492
PM22	A3	L-Glutamic acid g-monohydroxamate	0.0467	0.0562	0.05145	0.00671751
PM22	A4	L-Glutamic acid g-monohydroxamate	0.0453	0.052	0.04865	0.00473762
PM22	A5	Sodium Metavanadate	0.2942	0.5006	0.3974	0.145947
PM22	A6	Sodium Metavanadate	0.4543	0.5005	0.4774	0.0326683
PM22	A7	Sodium Metavanadate	0.5138	0.5282	0.521	0.0101823
PM22	A8	Sodium Metavanadate	0.5054	0.459	0.4822	0.0328098
PM22	A9	Caffeine	0.2568	0.3318	0.2943	0.053033
PM22	A10	Caffeine	0.1165	0.1337	0.1251	0.0121622
PM22	A11	Caffeine	0.0462	0.0542	0.0502	0.00565685
PM22	A12	Caffeine	0.0459	0.0505	0.0482	0.00325269
PM22	B1	L-Arginine hydroxamate	0.1612	0.4167	0.28895	0.180666
PM22	B2	L-Arginine hydroxamate	0.2917	0.4218	0.35675	0.0919946
PM22	B3	L-Arginine hydroxamate	0.201	0.222	0.2115	0.0148492
PM22	B4	L-Arginine hydroxamate	0.0453	0.0536	0.04945	0.00586899
PM22	B5	Glycine hydroxamate	0.2314	0.3448	0.2881	0.0801859
PM22	B6	Glycine hydroxamate	0.1203	0.2353	0.1778	0.0813173
PM22	B7	Glycine hydroxamate	0.246	0.0525	0.14925	0.136825
PM22	B8	Glycine hydroxamate	0.2284	0.0599	0.14415	0.119147
PM22	B9	Triclosan	0.0434	0.1034	0.0734	0.0424264
PM22	B10	Triclosan	0.0513	0.0503	0.0508	0.000707107
PM22	B11	Triclosan	0.0442	0.0593	0.05175	0.0106773
PM22	B12	Triclosan	0.0441	0.0653	0.0547	0.0149907
PM22	C1	3-Amino-1,2,4-triazole	0.0434	0.0921	0.06775	0.0344361
PM22	C2	3-Amino-1,2,4-triazole	0.0446	0.0511	0.04785	0.00459619
PM22	C3	3-Amino-1,2,4-triazole	0.0442	0.049	0.0466	0.00339411
PM22	C4	3-Amino-1,2,4-triazole	0.0473	0.0486	0.04795	0.000919239
PM22	C5	Miltefosine	0.3728	0.4641	0.41845	0.0645588
PM22	C6	Miltefosine	0.3639	0.4266	0.39525	0.0443356
PM22	C7	Miltefosine	0.0501	0.1728	0.11145	0.086762
PM22	C8	Miltefosine	0.0451	0.0476	0.04635	0.00176777
PM22	C9	DL-Serine hydroxamate	0.3357	0.4269	0.3813	0.0644881
PM22	C10	DL-Serine hydroxamate	0.2882	0.2867	0.28745	0.00106066
PM22	C11	DL-Serine hydroxamate	0.0453	0.0679	0.0566	0.0159806
PM22	C12	DL-Serine hydroxamate	0.0445	0.0582	0.05135	0.00968736
PM22	D1	Polymyxin B	0.046	0.0638	0.0549	0.0125865
PM22	D2	Polymyxin B	0.0442	0.0538	0.049	0.00678823
PM22	D3	Polymyxin B	0.0435	0.05	0.04675	0.00459619
PM22	D4	Polymyxin B	0.0435	0.0504	0.04695	0.00487904
PM22	D5	Urea hydrogen peroxide	0.3312	0.4188	0.375	0.0619426
PM22	D6	Urea hydrogen peroxide	0.4963	0.5194	0.50785	0.0163342
PM22	D7	Urea hydrogen peroxide	0.2318	0.4477	0.33975	0.152664
PM22	D8	Urea hydrogen peroxide	0.2119	0.3853	0.2986	0.122612
PM22	D9	Sodium arsenate	0.477	0.4149	0.44595	0.0439113
PM22	D10	Sodium arsenate	0.454	0.3962	0.4251	0.0408708
PM22	D11	Sodium arsenate	0.2845	0.3877	0.3361	0.0729734
PM22	D12	Sodium arsenate	0.131	0.2728	0.2019	0.100268
PM22	E1	CCCP	0.3727	0.4334	0.40305	0.0429214
PM22	E2	CCCP	0.0538	0.1759	0.11485	0.0863377
PM22	E3	CCCP	0.0432	0.0493	0.04625	0.00431335
PM22	E4	CCCP	0.0499	0.0509	0.0504	0.000707107
PM22	E5	BAPTA	0.1383	1.0243	0.5813	0.626497
PM22	E6	BAPTA	0.0464	0.1931	0.11975	0.103733
PM22	E7	BAPTA	0.0511	0.0534	0.05225	0.00162635
PM22	E8	BAPTA	0.0512	0.0521	0.05165	0.000636396
PM22	E9	D-Serine	0.4163	0.4605	0.4384	0.0312541
PM22	E10	D-Serine	0.3113	0.3754	0.34335	0.0453255
PM22	E11	D-Serine	0.3748	0.4257	0.40025	0.0359917
PM22	E12	D-Serine	0.2969	0.4034	0.35015	0.0753069
PM22	F1	Azaserine	0.0452	0.0573	0.05125	0.00855599
PM22	F2	Azaserine	0.0444	0.0553	0.04985	0.00770746
PM22	F3	Azaserine	0.045	0.0534	0.0492	0.0059397
PM22	F4	Azaserine	0.0441	0.0822	0.06315	0.0269408
PM22	F5	Lithium chloride	0.0436	0.0487	0.04615	0.00360624
PM22	F6	Lithium chloride	0.1176	0.047	0.0823	0.0499217
PM22	F7	Lithium chloride	0.0724	0.0469	0.05965	0.0180312
PM22	F8	Lithium chloride	0.0432	0.0474	0.0453	0.00296985
PM22	F9	FCCP	0.5022	0.4323	0.46725	0.0494268
PM22	F10	FCCP	0.191	0.3159	0.25345	0.0883176
PM22	F11	FCCP	0.0428	0.0859	0.06435	0.0304763
PM22	F12	FCCP	0.0466	0.0544	0.0505	0.00551543
PM22	G1	Benzamidine hydrochloride	0.1559	0.329	0.24245	0.1224
PM22	G2	Benzamidine hydrochloride	0.0436	0.0488	0.0462	0.00367696
PM22	G3	Benzamidine hydrochloride	0.0441	0.0483	0.0462	0.00296985
PM22	G4	Benzamidine hydrochloride	0.0446	0.049	0.0468	0.00311127
PM22	G5	Cycloheximide	0.4265	0.3403	0.3834	0.0609526
PM22	G6	Cycloheximide	0.4829	0.3902	0.43655	0.0655488
PM22	G7	Cycloheximide	0.3952	0.3652	0.3802	0.0212132
PM22	G8	Cycloheximide	0.2922	0.3765	0.33435	0.0596091
PM22	G9	Thallium(I) acetate	0.0433	0.1524	0.09785	0.0771453
PM22	G10	Thallium(I) acetate	0.0436	0.0469	0.04525	0.00233345
PM22	G11	Thallium(I) acetate	0.05	0.0469	0.04845	0.00219203
PM22	G12	Thallium(I) acetate	0.0442	0.0489	0.04655	0.0033234
PM22	H1	Bleomycin	0.3959	0.3521	0.374	0.0309713
PM22	H2	Bleomycin	0.3167	0.3421	0.3294	0.0179605
PM22	H3	Bleomycin	0.1093	0.31	0.20965	0.141916
PM22	H4	Bleomycin	0.0449	0.0923	0.0686	0.0335169
PM22	H5	Paromomycin	0.0448	0.0741	0.05945	0.0207182
PM22	H6	Paromomycin	0.0457	0.0512	0.04845	0.00388909
PM22	H7	Paromomycin	0.0477	0.0504	0.04905	0.00190919
PM22	H8	Paromomycin	0.0511	0.0537	0.0524	0.00183848
PM22	H9	Myclobutanil	0.4468	0.4171	0.43195	0.0210011
PM22	H10	Myclobutanil	0.5462	0.4226	0.4844	0.0873984
PM22	H11	Myclobutanil	0.3709	0.4388	0.40485	0.0480126
PM22	H12	Myclobutanil	0.1182	0.2476	0.1829	0.0914996
PM23	A1	Benzethonium chloride	0.2573	0.4021	0.3297	0.102389
PM23	A2	Benzethonium chloride	0.0637	0.1649	0.1143	0.0715592
PM23	A3	Benzethonium chloride	0.044	0.0486	0.0463	0.00325269
PM23	A4	Benzethonium chloride	0.0443	0.0501	0.0472	0.00410122
PM23	A5	Chlorpromazine	0.2534	0.4204	0.3369	0.118087
PM23	A6	Chlorpromazine	0.0456	0.2903	0.16795	0.173029
PM23	A7	Chlorpromazine	0.0457	0.0566	0.05115	0.00770746
PM23	A8	Chlorpromazine	0.0463	0.0608	0.05355	0.010253
PM23	A9	Ammonium sulfate	0.4281	0.4127	0.4204	0.0108894
PM23	A10	Ammonium sulfate	0.3477	0.3584	0.35305	0.00756604
PM23	A11	Ammonium sulfate	0.3264	0.0706	0.1985	0.180878
PM23	A12	Ammonium sulfate	0.0945	0.0473	0.0709	0.0333754
PM23	B1	Cadmium chloride	0.0753	0.3621	0.2187	0.202798
PM23	B2	Cadmium chloride	0.0466	0.1034	0.075	0.0401637
PM23	B3	Cadmium chloride	0.0429	0.0547	0.0488	0.00834386
PM23	B4	Cadmium chloride	0.0449	0.0475	0.0462	0.00183848
PM23	B5	Dequalinium chloride	0.2187	0.3765	0.2976	0.111581
PM23	B6	Dequalinium chloride	0.0441	0.0525	0.0483	0.0059397
PM23	B7	Dequalinium chloride	0.0485	0.0507	0.0496	0.00155563
PM23	B8	Dequalinium chloride	0.0448	0.0515	0.04815	0.00473762
PM23	B9	Doxycycline	0.4022	0.3147	0.35845	0.0618718
PM23	B10	Doxycycline	0.1893	0.2081	0.1987	0.0132936
PM23	B11	Doxycycline	0.1459	0.1522	0.14905	0.00445477
PM23	B12	Doxycycline	0.2166	0.2344	0.2255	0.0125865
PM23	C1	Glycine hydrochloride	0.0426	0.2077	0.12515	0.116743
PM23	C2	Glycine hydrochloride	0.0427	0.0526	0.04765	0.00700036
PM23	C3	Glycine hydrochloride	0.0419	0.0492	0.04555	0.00516188
PM23	C4	Glycine hydrochloride	0.0421	0.0481	0.0451	0.00424264
PM23	C5	Hydroxylamine	0.2425	0.3434	0.29295	0.0713471
PM23	C6	Hydroxylamine	0.2899	0.3194	0.30465	0.0208597
PM23	C7	Hydroxylamine	0.2548	0.3551	0.30495	0.0709228
PM23	C8	Hydroxylamine	0.3264	0.3299	0.32815	0.00247487
PM23	C9	Poly-L-lysine	0.0453	0.3193	0.1823	0.193747
PM23	C10	Poly-L-lysine	0.0449	0.1568	0.10085	0.0791252
PM23	C11	Poly-L-lysine	0.0434	0.0691	0.05625	0.0181726
PM23	C12	Poly-L-lysine	0.0447	0.0493	0.047	0.00325269
PM23	D1	Chromium(III) chloride	0.1888	0.3012	0.245	0.0794788
PM23	D2	Chromium(III) chloride	0.1075	0.152	0.12975	0.0314663
PM23	D3	Chromium(III) chloride	0.0493	0.0589	0.0541	0.00678823
PM23	D4	Chromium(III) chloride	0.1239	0.0592	0.09155	0.0457498
PM23	D5	Cobalt(II) chloride	0.1582	0.3724	0.2653	0.151462
PM23	D6	Cobalt(II) chloride	0.1088	0.2517	0.18025	0.101046
PM23	D7	Cobalt(II) chloride	0.0426	0.049	0.0458	0.00452548
PM23	D8	Cobalt(II) chloride	0.0441	0.0485	0.0463	0.00311127
PM23	D9	Cupric(II) chloride	0.0443	0.1041	0.0742	0.042285
PM23	D10	Cupric(II) chloride	0.1286	0.1237	0.12615	0.00346482
PM23	D11	Cupric(II) chloride	0.0866	0.0748	0.0807	0.00834386
PM23	D12	Cupric(II) chloride	0.1095	0.0821	0.0958	0.0193747
PM23	E1	Sodium metaborate	0.1771	0.3588	0.26795	0.128481
PM23	E2	Sodium metaborate	0.0902	0.0794	0.0848	0.00763675
PM23	E3	Sodium metaborate	0.0431	0.0507	0.0469	0.00537401
PM23	E4	Sodium metaborate	0.0426	0.0465	0.04455	0.00275772
PM23	E5	Sodium metaperiodate	0.153	0.1693	0.16115	0.0115258
PM23	E6	Sodium metaperiodate	0.3126	0.4615	0.38705	0.105288
PM23	E7	Sodium metaperiodate	0.3678	0.445	0.4064	0.0545886
PM23	E8	Sodium metaperiodate	0.3232	0.4045	0.36385	0.0574878
PM23	E9	Sodium metaarsenite	0.1637	0.2498	0.20675	0.0608819
PM23	E10	Sodium metaarsenite	0.073	0.067	0.07	0.00424264
PM23	E11	Sodium metaarsenite	0.0475	0.0466	0.04705	0.000636396
PM23	E12	Sodium metaarsenite	0.0469	0.0531	0.05	0.00438406
PM23	F1	Sodium azide	0.1453	0.2894	0.21735	0.101894
PM23	F2	Sodium azide	0.1735	0.1008	0.13715	0.0514067
PM23	F3	Sodium azide	0.0506	0.0564	0.0535	0.00410122
PM23	F4	Sodium azide	0.0439	0.0504	0.04715	0.00459619
PM23	F5	Caprylic acid	0.1139	0.0943	0.1041	0.0138593
PM23	F6	Caprylic acid	0.2464	0.3382	0.2923	0.0649124
PM23	F7	Caprylic acid	0.2839	0.4304	0.35715	0.103591
PM23	F8	Caprylic acid	0.4356	0.4334	0.4345	0.00155563
PM23	F9	Sodium cyanate	0.2839	0.3375	0.3107	0.0379009
PM23	F10	Sodium cyanate	0.1796	0.119	0.1493	0.0428507
PM23	F11	Sodium cyanate	0.0451	0.0483	0.0467	0.00226274
PM23	F12	Sodium cyanate	0.0438	0.0468	0.0453	0.00212132
PM23	G1	Sodium nitrite	0.1663	0.4222	0.29425	0.180949
PM23	G2	Sodium nitrite	0.1222	0.1556	0.1389	0.0236174
PM23	G3	Sodium nitrite	0.0497	0.0666	0.05815	0.0119501
PM23	G4	Sodium nitrite	0.0501	0.0845	0.0673	0.0243245
PM23	G5	Sodium orthovanadate	0.2318	0.2097	0.22075	0.0156271
PM23	G6	Sodium orthovanadate	0.3212	0.3101	0.31565	0.00784889
PM23	G7	Sodium orthovanadate	0.3106	0.2884	0.2995	0.0156978
PM23	G8	Sodium orthovanadate	0.0999	0.1311	0.1155	0.0220617
PM23	G9	2-Deoxy-D-glucose	0.5354	0.3682	0.4518	0.118228
PM23	G10	2-Deoxy-D-glucose	0.5409	0.3861	0.4635	0.10946
PM23	G11	2-Deoxy-D-glucose	0.3595	0.3505	0.355	0.00636396
PM23	G12	2-Deoxy-D-glucose	0.3067	0.3564	0.33155	0.0351432
PM23	H1	Sodium selenate	0.2384	0.3739	0.30615	0.095813
PM23	H2	Sodium selenate	0.2608	0.4364	0.3486	0.124168
PM23	H3	Sodium selenate	0.2649	0.3768	0.32085	0.0791252
PM23	H4	Sodium selenate	0.3287	0.434	0.38135	0.0744583
PM23	H5	Sodium cyanide	0.3024	0.3773	0.33985	0.0529623
PM23	H6	Sodium cyanide	0.5064	0.3433	0.42485	0.115329
PM23	H7	Sodium cyanide	0.3406	0.3069	0.32375	0.0238295
PM23	H8	Sodium cyanide	0.0449	0.0479	0.0464	0.00212132
PM23	H9	Sodium thiosulfate	0.4146	0.3774	0.396	0.0263044
PM23	H10	Sodium thiosulfate	0.5535	0.4599	0.5067	0.0661852
PM23	H11	Sodium thiosulfate	0.3261	0.4299	0.378	0.0733977
PM23	H12	Sodium thiosulfate	0.3843	0.3641	0.3742	0.0142836
PM24	A1	Apramycin	0.442	0.3805	0.41125	0.0434871
PM24	A2	Apramycin	0.3892	0.3484	0.3688	0.02885
PM24	A3	Apramycin	0.3095	0.4076	0.35855	0.0693672
PM24	A4	Apramycin	0.4445	0.4272	0.43585	0.0122329
PM24	A5	9-Aminoacridine	0.5455	0.4552	0.50035	0.0638517
PM24	A6	9-Aminoacridine	0.2666	0.3926	0.3296	0.0890955
PM24	A7	9-Aminoacridine	0.0472	0.051	0.0491	0.00268701
PM24	A8	9-Aminoacridine	0.0462	0.0498	0.048	0.00254558
PM24	A9	Zaragozic acid A	0.5469	0.5156	0.53125	0.0221324
PM24	A10	Zaragozic acid A	0.4878	0.468	0.4779	0.0140007
PM24	A11	Zaragozic acid A	0.5676	0.4711	0.51935	0.0682358
PM24	A12	Zaragozic acid A	0.4205	0.4656	0.44305	0.0318905
PM24	B1	Blasticidin S	0.1202	0.2351	0.17765	0.0812466
PM24	B2	Blasticidin S	0.0763	0.179	0.12765	0.0726199
PM24	B3	Blasticidin S	0.0763	0.1723	0.1243	0.0678823
PM24	B4	Blasticidin S	0.0725	0.2362	0.15435	0.115753
PM24	B5	Thioridazine	0.5614	0.3982	0.4798	0.1154
PM24	B6	Thioridazine	0.1756	0.4674	0.3215	0.206334
PM24	B7	Thioridazine	0.044	0.0523	0.04815	0.00586899
PM24	B8	Thioridazine	0.0453	0.0584	0.05185	0.0092631
PM24	B9	Sodium benzoate	0.0441	0.4892	0.26665	0.314733
PM24	B10	Sodium benzoate	0.5427	0.0482	0.29545	0.349664
PM24	B11	Sodium benzoate	0.0505	0.0495	0.05	0.000707107
PM24	B12	Sodium benzoate	0.0475	0.3738	0.21065	0.230729
PM24	C1	Chlortetracycline	0.443	0.3997	0.42135	0.0306177
PM24	C2	Chlortetracycline	0.4878	0.3696	0.4287	0.08358
PM24	C3	Chlortetracycline	0.0617	0.0686	0.06515	0.00487904
PM24	C4	Chlortetracycline	0.2895	0.3229	0.3062	0.0236174
PM24	C5	Sodium metasilicate	0.4147	0.444	0.42935	0.0207182
PM24	C6	Sodium metasilicate	0.402	0.4837	0.44285	0.0577706
PM24	C7	Sodium metasilicate	0.4991	0.4679	0.4835	0.0220617
PM24	C8	Sodium metasilicate	0.2794	0.3585	0.31895	0.0559321
PM24	C9	Pentamidine isethionate	0.0449	0.0548	0.04985	0.00700036
PM24	C10	Pentamidine isethionate	0.0475	0.0515	0.0495	0.00282843
PM24	C11	Pentamidine isethionate	0.0441	0.0507	0.0474	0.0046669
PM24	C12	Pentamidine isethionate	0.0489	0.2692	0.15905	0.155776
PM24	D1	6-Azauracil	0.1998	0.3161	0.25795	0.0822365
PM24	D2	6-Azauracil	0.1843	0.2819	0.2331	0.0690136
PM24	D3	6-Azauracil	0.2026	0.2598	0.2312	0.0404465
PM24	D4	6-Azauracil	0.1543	0.3083	0.2313	0.108894
PM24	D5	Potassium chromate	0.2067	0.2121	0.2094	0.00381838
PM24	D6	Potassium chromate	0.1016	0.1245	0.11305	0.0161927
PM24	D7	Potassium chromate	0.0444	0.0556	0.05	0.0079196
PM24	D8	Potassium chromate	0.0473	0.0516	0.04945	0.00304056
PM24	D9	Thialysine	0.0471	0.057	0.05205	0.00700036
PM24	D10	Thialysine	0.0464	0.0608	0.0536	0.0101823
PM24	D11	Thialysine	0.0441	0.048	0.04605	0.00275772
PM24	D12	Thialysine	0.0454	0.0487	0.04705	0.00233345
PM24	E1	Berberine chloride	0.4163	0.3551	0.3857	0.0432749
PM24	E2	Berberine chloride	0.2372	0.3253	0.28125	0.0622961
PM24	E3	Berberine chloride	0.0461	0.051	0.04855	0.00346482
PM24	E4	Berberine chloride	0.0474	0.0519	0.04965	0.00318198
PM24	E5	EGTA	0.3511	0.4248	0.38795	0.0521138
PM24	E6	EGTA	0.3332	0.047	0.1901	0.202374
PM24	E7	EGTA	0.5926	0.4525	0.52255	0.0990657
PM24	E8	EGTA	0.6266	0.4349	0.53075	0.135552
PM24	E9	Sodium pyrophosphate	0.4432	0.5123	0.47775	0.0488611
PM24	E10	Sodium pyrophosphate	0.2221	0.3756	0.29885	0.108541
PM24	E11	Sodium pyrophosphate	0.0435	0.0481	0.0458	0.00325269
PM24	E12	Sodium pyrophosphate	0.0668	0.0508	0.0588	0.0113137
PM24	F1	Isoniazid	0.4098	0.4554	0.4326	0.0322441
PM24	F2	Isoniazid	0.3858	0.3813	0.38355	0.00318198
PM24	F3	Isoniazid	0.131	0.1867	0.15885	0.0393858
PM24	F4	Isoniazid	0.0449	0.0503	0.0476	0.00381838
PM24	F5	Methyl viologen	0.2841	0.4076	0.34585	0.0873277
PM24	F6	Methyl viologen	0.3062	0.3479	0.32705	0.0294864
PM24	F7	Methyl viologen	0.2483	0.407	0.32765	0.112218
PM24	F8	Methyl viologen	0.0462	0.1565	0.10135	0.0779939
PM24	F9	Sodium fluoride	0.4464	0.3929	0.41965	0.0378302
PM24	F10	Sodium fluoride	0.3671	0.4052	0.38615	0.0269408
PM24	F11	Sodium fluoride	0.3853	0.4622	0.42375	0.0543765
PM24	F12	Sodium fluoride	0.2942	0.3552	0.3247	0.0431335
PM24	G1	Cisplatin	0.0454	0.0966	0.071	0.0362039
PM24	G2	Cisplatin	0.0435	0.0481	0.0458	0.00325269
PM24	G3	Cisplatin	0.0435	0.0493	0.0464	0.00410122
PM24	G4	Cisplatin	0.0445	0.0516	0.04805	0.00502046
PM24	G5	Aluminum sulfate	0.411	0.3755	0.39325	0.0251023
PM24	G6	Aluminum sulfate	0.2416	0.3323	0.28695	0.0641346
PM24	G7	Aluminum sulfate	0.2344	0.2096	0.222	0.0175362
PM24	G8	Aluminum sulfate	0.4148	0.2476	0.3312	0.118228
PM24	G9	Fluconazole	0.6539	0.4566	0.55525	0.139512
PM24	G10	Fluconazole	0.5271	0.459	0.49305	0.048154
PM24	G11	Fluconazole	0.3514	0.3983	0.37485	0.0331633
PM24	G12	Fluconazole	0.1606	0.2463	0.20345	0.0605991
PM24	H1	Propiconazole	0.5995	0.4255	0.5125	0.123037
PM24	H2	Propiconazole	0.605	0.4501	0.52755	0.109531
PM24	H3	Propiconazole	0.4701	0.3908	0.43045	0.0560736
PM24	H4	Propiconazole	0.3923	0.4703	0.4313	0.0551543
PM24	H5	Tamoxifen	0.4515	0.4324	0.44195	0.0135057
PM24	H6	Tamoxifen	0.0435	0.0755	0.0595	0.0226274
PM24	H7	Tamoxifen	0.0465	0.0566	0.05155	0.00714178
PM24	H8	Tamoxifen	0.0455	0.0587	0.0521	0.00933381
PM24	H9	Miconazole	0.4954	0.439	0.4672	0.0398808
PM24	H10	Miconazole	0.4957	0.5024	0.49905	0.00473762
PM24	H11	Miconazole	0.6003	0.4588	0.52955	0.100056
PM24	H12	Miconazole	0.4799	0.4784	0.47915	0.00106066
PM25	A1	Hydroxyurea	0.0623	0.0778	0.07005	0.0109602
PM25	A2	Hydroxyurea	0.0496	0.0578	0.0537	0.00579828
PM25	A3	Hydroxyurea	0.0458	0.0523	0.04905	0.00459619
PM25	A4	Hydroxyurea	0.0432	0.0467	0.04495	0.00247487
PM25	A5	Tobramycin	0.4072	0.4886	0.4479	0.0575585
PM25	A6	Tobramycin	0.3744	0.4395	0.40695	0.0460327
PM25	A7	Tobramycin	0.1372	0.2896	0.2134	0.107763
PM25	A8	Tobramycin	0.0439	0.1219	0.0829	0.0551543
PM25	A9	Niaproof	0.0552	0.1594	0.1073	0.0736805
PM25	A10	Niaproof	0.4575	0.4174	0.43745	0.028355
PM25	A11	Niaproof	0.0447	0.0534	0.04905	0.00615183
PM25	A12	Niaproof	0.0439	0.0503	0.0471	0.00452548
PM25	B1	b-Chloro-L-alanine	0.3854	0.487	0.4362	0.071842
PM25	B2	b-Chloro-L-alanine	0.3793	0.4489	0.4141	0.0492146
PM25	B3	b-Chloro-L-alanine	0.3301	0.4533	0.3917	0.0871156
PM25	B4	b-Chloro-L-alanine	0.3247	0.4078	0.36625	0.0587606
PM25	B5	Tetrazolium Violet	0.0814	0.1038	0.0926	0.0158392
PM25	B6	Tetrazolium Violet	0.0441	0.0512	0.04765	0.00502046
PM25	B7	Tetrazolium Violet	0.0438	0.0523	0.04805	0.00601041
PM25	B8	Tetrazolium Violet	0.0457	0.0587	0.0522	0.00919239
PM25	B9	Kanamycin	0.4513	0.4407	0.446	0.00749533
PM25	B10	Kanamycin	0.5006	0.4694	0.485	0.0220617
PM25	B11	Kanamycin	0.2312	0.3591	0.29515	0.090439
PM25	B12	Kanamycin	0.0591	0.4602	0.25965	0.283621
PM25	C1	4-Aminopyridine	0.4056	0.4845	0.44505	0.0557907
PM25	C2	4-Aminopyridine	0.4202	0.3971	0.40865	0.0163342
PM25	C3	4-Aminopyridine	0.2012	0.339	0.2701	0.0974393
PM25	C4	4-Aminopyridine	0.0429	0.0471	0.045	0.00296985
PM25	C5	Amitriptyline	0.0472	0.0491	0.04815	0.0013435
PM25	C6	Amitriptyline	0.0434	0.0513	0.04735	0.00558614
PM25	C7	Amitriptyline	0.0447	0.0537	0.0492	0.00636396
PM25	C8	Amitriptyline	0.044	0.0593	0.05165	0.0108187
PM25	C9	4-Nitroquinoline N-oxide	0.6056	0.442	0.5238	0.115683
PM25	C10	4-Nitroquinoline N-oxide	0.2261	0.3571	0.2916	0.092631
PM25	C11	4-Nitroquinoline N-oxide	0.309	0.447	0.378	0.0975807
PM25	C12	4-Nitroquinoline N-oxide	0.0456	0.2056	0.1256	0.113137
PM25	D1	Alexidine	0.044	0.0495	0.04675	0.00388909
PM25	D2	Alexidine	0.0447	0.0502	0.04745	0.00388909
PM25	D3	Alexidine	0.0456	0.0537	0.04965	0.00572756
PM25	D4	Alexidine	0.0441	0.0686	0.05635	0.0173241
PM25	D5	Hygromycin B	0.0439	0.3665	0.2052	0.228113
PM25	D6	Hygromycin B	0.0435	0.0573	0.0504	0.00975807
PM25	D7	Hygromycin B	0.0429	0.049	0.04595	0.00431335
PM25	D8	Hygromycin B	0.0447	0.0494	0.04705	0.0033234
PM25	D9	5-Fluorodeoxyuridine	0.0438	0.051	0.0474	0.00509117
PM25	D10	5-Fluorodeoxyuridine	0.0471	0.0507	0.0489	0.00254558
PM25	D11	5-Fluorodeoxyuridine	0.0436	0.0489	0.04625	0.00374767
PM25	D12	5-Fluorodeoxyuridine	0.044	0.0507	0.04735	0.00473762
PM25	E1	Sodium salicylate	0.3906	0.3876	0.3891	0.00212132
PM25	E2	Sodium salicylate	0.2841	0.2546	0.26935	0.0208597
PM25	E3	Sodium salicylate	0.1543	0.2358	0.19505	0.0576292
PM25	E4	Sodium salicylate	0.0462	0.0984	0.0723	0.036911
PM25	E5	Succinic acid	0.4727	0.3928	0.43275	0.0564978
PM25	E6	Succinic acid	0.3681	0.3954	0.38175	0.019304
PM25	E7	Succinic acid	0.1669	0.3398	0.25335	0.122259
PM25	E8	Succinic acid	0.0462	0.0482	0.0472	0.00141421
PM25	E9	Clomiphene	0.3108	0.0686	0.1897	0.171261
PM25	E10	Clomiphene	0.0444	0.0629	0.05365	0.0130815
PM25	E11	Clomiphene	0.0442	0.0541	0.04915	0.00700036
PM25	E12	Clomiphene	0.0445	0.058	0.05125	0.00954594
PM25	F1	DL-Malic acid	0.0644	0.0896	0.077	0.0178191
PM25	F2	DL-Malic acid	0.0434	0.0508	0.0471	0.00523259
PM25	F3	DL-Malic acid	0.0444	0.0494	0.0469	0.00353553
PM25	F4	DL-Malic acid	0.043	0.0509	0.04695	0.00558614
PM25	F5	Tartaric acid	0.0746	0.1016	0.0881	0.0190919
PM25	F6	Tartaric acid	0.0437	0.0546	0.04915	0.00770746
PM25	F7	Tartaric acid	0.0466	0.0635	0.05505	0.0119501
PM25	F8	Tartaric acid	0.0472	0.0485	0.04785	0.000919239
PM25	F9	Fumaric acid	0.4603	0.3662	0.41325	0.0665387
PM25	F10	Fumaric acid	0.4897	0.3691	0.4294	0.0852771
PM25	F11	Fumaric acid	0.449	0.3456	0.3973	0.0731148
PM25	F12	Fumaric acid	0.1826	0.0972	0.1399	0.0603869
PM25	G1	5-Fluorocytosine	0.1981	0.3696	0.28385	0.121269
PM25	G2	5-Fluorocytosine	0.1662	0.2853	0.22575	0.0842164
PM25	G3	5-Fluorocytosine	0.1762	0.0553	0.11575	0.0854892
PM25	G4	5-Fluorocytosine	0.1246	0.052	0.0883	0.051336
PM25	G5	Palladium(II) chloride	0.0619	0.0581	0.06	0.00268701
PM25	G6	Palladium(II) chloride	0.0452	0.0498	0.0475	0.00325269
PM25	G7	Palladium(II) chloride	0.067	0.0547	0.06085	0.00869741
PM25	G8	Palladium(II) chloride	0.138	0.0795	0.10875	0.0413657
PM25	G9	Ibuprofen	0.3554	0.4499	0.40265	0.0668216
PM25	G10	Ibuprofen	0.3853	0.3733	0.3793	0.00848528
PM25	G11	Ibuprofen	0.339	0.3629	0.35095	0.0168999
PM25	G12	Ibuprofen	0.2158	0.3725	0.29415	0.110804
PM25	H1	Chloroquine	0.2064	0.2554	0.2309	0.0346482
PM25	H2	Chloroquine	0.0451	0.0569	0.051	0.00834386
PM25	H3	Chloroquine	0.0442	0.0485	0.04635	0.00304056
PM25	H4	Chloroquine	0.0447	0.0502	0.04745	0.00388909
PM25	H5	trans-Cinnamic acid	0.3744	0.485	0.4297	0.078206
PM25	H6	trans-Cinnamic acid	0.4111	0.5164	0.46375	0.0744583
PM25	H7	trans-Cinnamic acid	0.3638	0.5285	0.44615	0.11646
PM25	H8	trans-Cinnamic acid	0.2724	0.4882	0.3803	0.152594
PM25	H9	5-Fluorouracil	0.0444	0.0516	0.048	0.00509117
PM25	H10	5-Fluorouracil	0.0457	0.0527	0.0492	0.00494975
PM25	H11	5-Fluorouracil	0.0445	0.0535	0.049	0.00636396
PM25	H12	5-Fluorouracil	0.049	0.0502	0.0496	0.000848528

## Sheet: ABTS
Plate	Well	Compound	ABTS (1)	ABTS (2)	ABTS (average)	Standard Deviation
PM21	A1	Guanidine hydrochloride	0.3447	0.3329	0.3388	0.00834386
PM21	A2	Guanidine hydrochloride	0.2568	0.2482	0.2525	0.00608112
PM21	A3	Guanidine hydrochloride	0.0212	0.0325	0.02685	0.00799031
PM21	A4	Guanidine hydrochloride	0.0223	0.0329	0.0276	0.00749533
PM21	A5	2,2`-Dipyridyl	0.0519	0.0317	0.0418	0.0142836
PM21	A6	2,2`-Dipyridyl	0.0503	0.0399	0.0451	0.00735391
PM21	A7	2,2`-Dipyridyl	0.0345	0.0394	0.03695	0.00346482
PM21	A8	2,2`-Dipyridyl	0.0673	0.041	0.05415	0.0185969
PM21	A9	Promethazine	0.736	0.5297	0.63285	0.145876
PM21	A10	Promethazine	0.0147	0.0319	0.0233	0.0121622
PM21	A11	Promethazine	0.005	0.0227	0.01385	0.0125158
PM21	A12	Promethazine	0.0048	0.0075	0.00615	0.00190919
PM21	B1	Nystatin	0.0184	0.0456	0.032	0.0192333
PM21	B2	Nystatin	0.0138	0.0285	0.02115	0.0103945
PM21	B3	Nystatin	0.0085	0.1267	0.0676	0.08358
PM21	B4	Nystatin	0.0294	0.0367	0.03305	0.00516188
PM21	B5	Dodecyltrimethyl ammonium bromide	0.0268	0.034	0.0304	0.00509117
PM21	B6	Dodecyltrimethyl ammonium bromide	0.0203	0.0334	0.02685	0.0092631
PM21	B7	Dodecyltrimethyl ammonium bromide	0.0209	0.0333	0.0271	0.00876812
PM21	B8	Dodecyltrimethyl ammonium bromide	0.0277	0.0353	0.0315	0.00537401
PM21	B9	Protamine sulfate	0.0587	0.0402	0.04945	0.0130815
PM21	B10	Protamine sulfate	0.0726	0.0312	0.0519	0.0292742
PM21	B11	Protamine sulfate	0.0684	0.0307	0.04955	0.0266579
PM21	B12	Protamine sulfate	0.0613	0.0607	0.061	0.000424264
PM21	C1	Cetylpyridinium chloride	0.0352	0.0338	0.0345	0.000989949
PM21	C2	Cetylpyridinium chloride	0.0209	0.0466	0.03375	0.0181726
PM21	C3	Cetylpyridinium chloride	0.0224	0.0332	0.0278	0.00763675
PM21	C4	Cetylpyridinium chloride	0.0219	0.0329	0.0274	0.00777817
PM21	C5	Domiphen bromide	0.022	0.033	0.0275	0.00777817
PM21	C6	Domiphen bromide	0.021	0.033	0.027	0.00848528
PM21	C7	Domiphen bromide	0.0204	0.0333	0.02685	0.00912168
PM21	C8	Domiphen bromide	0.0214	0.0339	0.02765	0.00883883
PM21	C9	L-Aspartic acid b-hydroxamate	0.0233	0.0276	0.02545	0.00304056
PM21	C10	L-Aspartic acid b-hydroxamate	0.013	0.0205	0.01675	0.0053033
PM21	C11	L-Aspartic acid b-hydroxamate	0.012	0.0121	0.01205	7.07107e-05
PM21	C12	L-Aspartic acid b-hydroxamate	0.0059	0.006	0.00595	7.07107e-05
PM21	D1	Pyrithione	0.0295	0.0546	0.04205	0.0177484
PM21	D2	Pyrithione	0.0232	0.0411	0.03215	0.0126572
PM21	D3	Pyrithione	0.0204	0.0309	0.02565	0.00742462
PM21	D4	Pyrithione	0.021	0.0302	0.0256	0.00650538
PM21	D5	EDTA	0.0232	0.0344	0.0288	0.0079196
PM21	D6	EDTA	0.0268	0.033	0.0299	0.00438406
PM21	D7	EDTA	0.0326	0.0359	0.03425	0.00233345
PM21	D8	EDTA	0.037	0.0601	0.04855	0.0163342
PM21	D9	Sodium dichromate	0.0224	0.0357	0.02905	0.00940452
PM21	D10	Sodium dichromate	0.0256	0.0599	0.04275	0.0242538
PM21	D11	Sodium dichromate	0.0284	0.0398	0.0341	0.00806102
PM21	D12	Sodium dichromate	0.0469	0.0556	0.05125	0.00615183
PM21	E1	Compound 48/80	0.0778	0.034	0.0559	0.0309713
PM21	E2	Compound 48/80	0.0203	0.0323	0.0263	0.00848528
PM21	E3	Compound 48/80	0.0205	0.0326	0.02655	0.00855599
PM21	E4	Compound 48/80	0.0222	0.0497	0.03595	0.0194454
PM21	E5	Manganese(II) chloride	0.0443	0.0711	0.0577	0.0189505
PM21	E6	Manganese(II) chloride	0.0591	0.0895	0.0743	0.021496
PM21	E7	Manganese(II) chloride	0.0802	0.1297	0.10495	0.0350018
PM21	E8	Manganese(II) chloride	0.1062	0.0346	0.0704	0.0506288
PM21	E9	Magnesium chloride	0.023	0.0432	0.0331	0.0142836
PM21	E10	Magnesium chloride	0.0218	0.0271	0.02445	0.00374767
PM21	E11	Magnesium chloride	0.0158	0.0338	0.0248	0.0127279
PM21	E12	Magnesium chloride	0.0214	0.0329	0.02715	0.00813173
PM21	F1	Copper(II) sulfate	0.0219	0.036	0.02895	0.00997021
PM21	F2	Copper(II) sulfate	0.0197	0.0309	0.0253	0.0079196
PM21	F3	Copper(II) sulfate	0.0203	0.0305	0.0254	0.00721249
PM21	F4	Copper(II) sulfate	0.0192	0.0341	0.02665	0.0105359
PM21	F5	Neomycin	0.0131	0.0511	0.0321	0.0268701
PM21	F6	Neomycin	0.0007	0.049	0.02485	0.0341533
PM21	F7	Neomycin	0.0008	0.0017	0.00125	0.000636396
PM21	F8	Neomycin	0.0033	0.003	0.00315	0.000212132
PM21	F9	D-Cycloserine	0.0102	0.0124	0.0113	0.00155563
PM21	F10	D-Cycloserine	0.0017	0.0025	0.0021	0.000565685
PM21	F11	D-Cycloserine	0.0013	0.0025	0.0019	0.000848528
PM21	F12	D-Cycloserine	0.0035	0.0051	0.0043	0.00113137
PM21	G1	Sodium selenite	0.0802	0.0287	0.05445	0.036416
PM21	G2	Sodium selenite	0.0137	0.0275	0.0206	0.00975807
PM21	G3	Sodium selenite	0.0142	0.0292	0.0217	0.0106066
PM21	G4	Sodium selenite	0.0186	0.0317	0.02515	0.0092631
PM21	G5	Nickel(II) chloride	0.04	0.053	0.0465	0.00919239
PM21	G6	Nickel(II) chloride	0.0904	0.0503	0.07035	0.028355
PM21	G7	Nickel(II) chloride	0.0298	0.3371	0.18345	0.217294
PM21	G8	Nickel(II) chloride	0.0173	0.0812	0.04925	0.0451841
PM21	G9	Trifluoperazine	0.0212	0.0352	0.0282	0.00989949
PM21	G10	Trifluoperazine	0.0209	0.0346	0.02775	0.00968736
PM21	G11	Trifluoperazine	0.0198	0.0326	0.0262	0.00905097
PM21	G12	Trifluoperazine	0.2782	0.3034	0.2908	0.0178191
PM21	H1	Diamide	0.0415	0.0313	0.0364	0.00721249
PM21	H2	Diamide	0.021	0.0453	0.03315	0.0171827
PM21	H3	Diamide	0.0174	0.027	0.0222	0.00678823
PM21	H4	Diamide	0.0306	0.041	0.0358	0.00735391
PM21	H5	Thiourea	0.0004	0.0018	0.0011	0.000989949
PM21	H6	Thiourea	-0.0003	0.0011	0.0004	0.000989949
PM21	H7	Thiourea	0	0.0009	0.00045	0.000636396
PM21	H8	Thiourea	0.0002	0.0014	0.0008	0.000848528
PM21	H9	Zinc chloride	0.0194	0.0543	0.03685	0.024678
PM21	H10	Zinc chloride	0.018	0.0334	0.0257	0.0108894
PM21	H11	Zinc chloride	0.0212	0.0322	0.0267	0.00777817
PM21	H12	Zinc chloride	0.1036	0.1915	0.14755	0.0621547
PM22	A1	L-Glutamic acid g-monohydroxamate	0.0308	0.0279	0.02935	0.00205061
PM22	A2	L-Glutamic acid g-monohydroxamate	0.0232	0.0248	0.024	0.00113137
PM22	A3	L-Glutamic acid g-monohydroxamate	0.0162	0.0199	0.01805	0.0026163
PM22	A4	L-Glutamic acid g-monohydroxamate	0.0118	0.0124	0.0121	0.000424264
PM22	A5	Sodium Metavanadate	0.1726	0.0026	0.0876	0.120208
PM22	A6	Sodium Metavanadate	0.2532	0.0086	0.1309	0.172958
PM22	A7	Sodium Metavanadate	0.5366	0.0793	0.30795	0.32336
PM22	A8	Sodium Metavanadate	0.2376	0.2699	0.25375	0.0228395
PM22	A9	Caffeine	0.0464	0.035	0.0407	0.00806102
PM22	A10	Caffeine	0.0216	0.0409	0.03125	0.0136472
PM22	A11	Caffeine	0.0353	0.0342	0.03475	0.000777817
PM22	A12	Caffeine	0.0274	0.0341	0.03075	0.00473762
PM22	B1	L-Arginine hydroxamate	0.0091	0.0092	0.00915	7.07107e-05
PM22	B2	L-Arginine hydroxamate	0.0047	0.0047	0.0047	0
PM22	B3	L-Arginine hydroxamate	0.0042	0.002	0.0031	0.00155563
PM22	B4	L-Arginine hydroxamate	0.0021	0.0028	0.00245	0.000494975
PM22	B5	Glycine hydroxamate	0.0173	0.0072	0.01225	0.00714178
PM22	B6	Glycine hydroxamate	0.0019	0.0021	0.002	0.000141421
PM22	B7	Glycine hydroxamate	0.0164	0.0022	0.0093	0.0100409
PM22	B8	Glycine hydroxamate	0.0017	0.0019	0.0018	0.000141421
PM22	B9	Triclosan	0.0236	0.0348	0.0292	0.0079196
PM22	B10	Triclosan	0.0218	0.0325	0.02715	0.00756604
PM22	B11	Triclosan	0.0248	0.0313	0.02805	0.00459619
PM22	B12	Triclosan	0.0228	0.0314	0.0271	0.00608112
PM22	C1	3-Amino-1,2,4-triazole	0.0606	0.0263	0.04345	0.0242538
PM22	C2	3-Amino-1,2,4-triazole	0.0115	0.0159	0.0137	0.00311127
PM22	C3	3-Amino-1,2,4-triazole	0.0024	0.0053	0.00385	0.00205061
PM22	C4	3-Amino-1,2,4-triazole	0.0032	0.0051	0.00415	0.0013435
PM22	C5	Miltefosine	0.0404	0.0336	0.037	0.00480833
PM22	C6	Miltefosine	0.051	0.0615	0.05625	0.00742462
PM22	C7	Miltefosine	0.0225	0.0354	0.02895	0.00912168
PM22	C8	Miltefosine	0.0211	0.0332	0.02715	0.00855599
PM22	C9	DL-Serine hydroxamate	0.0151	0.0155	0.0153	0.000282843
PM22	C10	DL-Serine hydroxamate	0.0028	0.0071	0.00495	0.00304056
PM22	C11	DL-Serine hydroxamate	0.0058	0.0019	0.00385	0.00275772
PM22	C12	DL-Serine hydroxamate	0.0011	0.0018	0.00145	0.000494975
PM22	D1	Polymyxin B	0.024	0.0498	0.0369	0.0182434
PM22	D2	Polymyxin B	0.0226	0.0343	0.02845	0.00827315
PM22	D3	Polymyxin B	0.0247	0.0337	0.0292	0.00636396
PM22	D4	Polymyxin B	0.0232	0.039	0.0311	0.0111723
PM22	D5	Urea hydrogen peroxide	0.0357	0.0425	0.0391	0.00480833
PM22	D6	Urea hydrogen peroxide	0.0422	0.075	0.0586	0.0231931
PM22	D7	Urea hydrogen peroxide	0.1201	0.0679	0.094	0.036911
PM22	D8	Urea hydrogen peroxide	0.1074	0.0595	0.08345	0.0338704
PM22	D9	Sodium arsenate	0.0917	0.1015	0.0966	0.00692965
PM22	D10	Sodium arsenate	0.027	0.0769	0.05195	0.0352846
PM22	D11	Sodium arsenate	0.0881	0.0728	0.08045	0.0108187
PM22	D12	Sodium arsenate	0.0258	0.0354	0.0306	0.00678823
PM22	E1	CCCP	0.2427	0.3606	0.30165	0.0833679
PM22	E2	CCCP	0.0239	0.03	0.02695	0.00431335
PM22	E3	CCCP	0.034	0.0341	0.03405	7.07107e-05
PM22	E4	CCCP	0.028	0.034	0.031	0.00424264
PM22	E5	BAPTA	0.0039	0.3337	0.1688	0.233204
PM22	E6	BAPTA	0.0218	0.0033	0.01255	0.0130815
PM22	E7	BAPTA	0.0127	0.0026	0.00765	0.00714178
PM22	E8	BAPTA	0.0089	0.0021	0.0055	0.00480833
PM22	E9	D-Serine	0.122	0.1072	0.1146	0.0104652
PM22	E10	D-Serine	0.0858	0.0508	0.0683	0.0247487
PM22	E11	D-Serine	0.156	0.0328	0.0944	0.0871156
PM22	E12	D-Serine	0.0217	0.0288	0.02525	0.00502046
PM22	F1	Azaserine	0.0231	0.0334	0.02825	0.0072832
PM22	F2	Azaserine	0.0209	0.0325	0.0267	0.00820244
PM22	F3	Azaserine	0.0254	0.0337	0.02955	0.00586899
PM22	F4	Azaserine	0.0291	0.0326	0.03085	0.00247487
PM22	F5	Lithium chloride	0.0252	0.0334	0.0293	0.00579828
PM22	F6	Lithium chloride	0.0269	0.0339	0.0304	0.00494975
PM22	F7	Lithium chloride	0.0257	0.033	0.02935	0.00516188
PM22	F8	Lithium chloride	0.0235	0.0339	0.0287	0.00735391
PM22	F9	FCCP	0.0317	0.0692	0.05045	0.0265165
PM22	F10	FCCP	0.0455	0.0556	0.05055	0.00714178
PM22	F11	FCCP	0.0223	0.0331	0.0277	0.00763675
PM22	F12	FCCP	0.0205	0.0328	0.02665	0.00869741
PM22	G1	Benzamidine hydrochloride	0.0583	0.0494	0.05385	0.00629325
PM22	G2	Benzamidine hydrochloride	0.0258	0.0321	0.02895	0.00445477
PM22	G3	Benzamidine hydrochloride	0.0203	0.0323	0.0263	0.00848528
PM22	G4	Benzamidine hydrochloride	0.0224	0.034	0.0282	0.00820244
PM22	G5	Cycloheximide	0.0413	0.0478	0.04455	0.00459619
PM22	G6	Cycloheximide	0.0373	0.0911	0.0642	0.0380423
PM22	G7	Cycloheximide	0.0583	0.2223	0.1403	0.115966
PM22	G8	Cycloheximide	0.1071	0.1725	0.1398	0.0462448
PM22	G9	Thallium(I) acetate	0.0218	0.0344	0.0281	0.00890955
PM22	G10	Thallium(I) acetate	0.0217	0.035	0.02835	0.00940452
PM22	G11	Thallium(I) acetate	0.0214	0.0332	0.0273	0.00834386
PM22	G12	Thallium(I) acetate	0.0255	0.0325	0.029	0.00494975
PM22	H1	Bleomycin	0.0298	0.0429	0.03635	0.0092631
PM22	H2	Bleomycin	0.0508	0.0476	0.0492	0.00226274
PM22	H3	Bleomycin	0.0261	0.0921	0.0591	0.046669
PM22	H4	Bleomycin	0.0301	0.0337	0.0319	0.00254558
PM22	H5	Paromomycin	0.0024	0.0381	0.02025	0.0252437
PM22	H6	Paromomycin	0.0016	0.0018	0.0017	0.000141421
PM22	H7	Paromomycin	0.0035	0.0034	0.00345	7.07107e-05
PM22	H8	Paromomycin	0.0092	0.0081	0.00865	0.000777817
PM22	H9	Myclobutanil	0.0203	0.181	0.10065	0.113632
PM22	H10	Myclobutanil	0.0934	0.2254	0.1594	0.0933381
PM22	H11	Myclobutanil	0.0299	0.0547	0.0423	0.0175362
PM22	H12	Myclobutanil	0.0175	0.0446	0.03105	0.0191626
PM23	A1	Benzethonium chloride	0.0164	0.1214	0.0689	0.0742462
PM23	A2	Benzethonium chloride	0.0208	0.0809	0.05085	0.0424971
PM23	A3	Benzethonium chloride	0.021	0.0324	0.0267	0.00806102
PM23	A4	Benzethonium chloride	0.0222	0.0325	0.02735	0.0072832
PM23	A5	Chlorpromazine	0.7012	0.3717	0.53645	0.232992
PM23	A6	Chlorpromazine	0.0222	0.5607	0.29145	0.380777
PM23	A7	Chlorpromazine	0.0212	0.0341	0.02765	0.00912168
PM23	A8	Chlorpromazine	0.0215	0.0357	0.0286	0.0100409
PM23	A9	Ammonium sulfate	0.02	0.0388	0.0294	0.0132936
PM23	A10	Ammonium sulfate	0.0107	0.0291	0.0199	0.0130108
PM23	A11	Ammonium sulfate	0.0222	0.0357	0.02895	0.00954594
PM23	A12	Ammonium sulfate	0.0217	0.0327	0.0272	0.00777817
PM23	B1	Cadmium chloride	0.0191	0.0533	0.0362	0.0241831
PM23	B2	Cadmium chloride	0.0195	0.0394	0.02945	0.0140714
PM23	B3	Cadmium chloride	0.02	0.0324	0.0262	0.00876812
PM23	B4	Cadmium chloride	0.0298	0.0325	0.03115	0.00190919
PM23	B5	Dequalinium chloride	0.0186	0.0355	0.02705	0.0119501
PM23	B6	Dequalinium chloride	0.02	0.0314	0.0257	0.00806102
PM23	B7	Dequalinium chloride	0.0202	0.0316	0.0259	0.00806102
PM23	B8	Dequalinium chloride	0.0198	0.0325	0.02615	0.00898026
PM23	B9	Doxycycline	0.1769	0.2443	0.2106	0.047659
PM23	B10	Doxycycline	0.1982	0.1725	0.18535	0.0181726
PM23	B11	Doxycycline	0.0046	0.0075	0.00605	0.00205061
PM23	B12	Doxycycline	0.011	0.0137	0.01235	0.00190919
PM23	C1	Glycine hydrochloride	0.0542	0.0304	0.0423	0.0168291
PM23	C2	Glycine hydrochloride	0.0205	0.0321	0.0263	0.00820244
PM23	C3	Glycine hydrochloride	0.023	0.0359	0.02945	0.00912168
PM23	C4	Glycine hydrochloride	0.025	0.0366	0.0308	0.00820244
PM23	C5	Hydroxylamine	0.0182	0.0301	0.02415	0.00841457
PM23	C6	Hydroxylamine	0.0255	0.0292	0.02735	0.0026163
PM23	C7	Hydroxylamine	0.0219	0.0388	0.03035	0.0119501
PM23	C8	Hydroxylamine	0.018	0.0288	0.0234	0.00763675
PM23	C9	Poly-L-lysine	0.0197	0.0279	0.0238	0.00579828
PM23	C10	Poly-L-lysine	0.0196	0.0328	0.0262	0.00933381
PM23	C11	Poly-L-lysine	0.0182	0.0304	0.0243	0.0086267
PM23	C12	Poly-L-lysine	0.0193	0.0246	0.02195	0.00374767
PM23	D1	Chromium(III) chloride	0.0106	0.0332	0.0219	0.0159806
PM23	D2	Chromium(III) chloride	0.0184	0.0319	0.02515	0.00954594
PM23	D3	Chromium(III) chloride	0.0207	0.0322	0.02645	0.00813173
PM23	D4	Chromium(III) chloride	0.0207	0.0322	0.02645	0.00813173
PM23	D5	Cobalt(II) chloride	0.02	0.0299	0.02495	0.00700036
PM23	D6	Cobalt(II) chloride	0.0214	0.0305	0.02595	0.00643467
PM23	D7	Cobalt(II) chloride	0.0237	0.031	0.02735	0.00516188
PM23	D8	Cobalt(II) chloride	0.0198	0.031	0.0254	0.0079196
PM23	D9	Cupric(II) chloride	0.0225	0.0341	0.0283	0.00820244
PM23	D10	Cupric(II) chloride	0.0209	0.0337	0.0273	0.00905097
PM23	D11	Cupric(II) chloride	0.0206	0.0328	0.0267	0.0086267
PM23	D12	Cupric(II) chloride	0.0215	0.0327	0.0271	0.0079196
PM23	E1	Sodium metaborate	0.0541	0.0291	0.0416	0.0176777
PM23	E2	Sodium metaborate	0.0194	0.031	0.0252	0.00820244
PM23	E3	Sodium metaborate	0.0201	0.0303	0.0252	0.00721249
PM23	E4	Sodium metaborate	0.0206	0.0295	0.02505	0.00629325
PM23	E5	Sodium metaperiodate	0.0198	0.0307	0.02525	0.00770746
PM23	E6	Sodium metaperiodate	0.0187	0.0317	0.0252	0.00919239
PM23	E7	Sodium metaperiodate	0.0386	0.031	0.0348	0.00537401
PM23	E8	Sodium metaperiodate	0.0717	0.0357	0.0537	0.0254558
PM23	E9	Sodium metaarsenite	0.0237	0.0321	0.0279	0.0059397
PM23	E10	Sodium metaarsenite	0.0173	0.04	0.02865	0.0160513
PM23	E11	Sodium metaarsenite	0.0137	0.0312	0.02245	0.0123744
PM23	E12	Sodium metaarsenite	0.0134	0.0329	0.02315	0.0137886
PM23	F1	Sodium azide	0.0158	0.0289	0.02235	0.0092631
PM23	F2	Sodium azide	0.0186	0.033	0.0258	0.0101823
PM23	F3	Sodium azide	0.0228	0.0314	0.0271	0.00608112
PM23	F4	Sodium azide	0.0226	0.0319	0.02725	0.00657609
PM23	F5	Caprylic acid	0.0208	0.0328	0.0268	0.00848528
PM23	F6	Caprylic acid	0.0206	0.0329	0.02675	0.00869741
PM23	F7	Caprylic acid	0.022	0.0311	0.02655	0.00643467
PM23	F8	Caprylic acid	0.0453	0.0334	0.03935	0.00841457
PM23	F9	Sodium cyanate	0.022	0.0312	0.0266	0.00650538
PM23	F10	Sodium cyanate	0.02	0.0327	0.02635	0.00898026
PM23	F11	Sodium cyanate	0.0026	0.0285	0.01555	0.0183141
PM23	F12	Sodium cyanate	0.0017	0.0256	0.01365	0.0168999
PM23	G1	Sodium nitrite	0.051	0.0293	0.04015	0.0153442
PM23	G2	Sodium nitrite	0.0197	0.0327	0.0262	0.00919239
PM23	G3	Sodium nitrite	0.0224	0.0335	0.02795	0.00784889
PM23	G4	Sodium nitrite	0.0294	0.0387	0.03405	0.00657609
PM23	G5	Sodium orthovanadate	0.003	0.028	0.0155	0.0176777
PM23	G6	Sodium orthovanadate	0.0104	0.0334	0.0219	0.0162635
PM23	G7	Sodium orthovanadate	0.0457	0.0503	0.048	0.00325269
PM23	G8	Sodium orthovanadate	0.1279	0.1287	0.1283	0.000565685
PM23	G9	2-Deoxy-D-glucose	0.0287	0.0325	0.0306	0.00268701
PM23	G10	2-Deoxy-D-glucose	0.0272	0.0339	0.03055	0.00473762
PM23	G11	2-Deoxy-D-glucose	0.0558	0.0255	0.04065	0.0214253
PM23	G12	2-Deoxy-D-glucose	0.0189	0.0151	0.017	0.00268701
PM23	H1	Sodium selenate	0.0091	0.0275	0.0183	0.0130108
PM23	H2	Sodium selenate	0.0088	0.0277	0.01825	0.0133643
PM23	H3	Sodium selenate	0.012	0.0303	0.02115	0.0129401
PM23	H4	Sodium selenate	0.0151	0.0314	0.02325	0.0115258
PM23	H5	Sodium cyanide	0.0129	0.033	0.02295	0.0142128
PM23	H6	Sodium cyanide	0.0132	0.0329	0.02305	0.01393
PM23	H7	Sodium cyanide	0.0182	0.0316	0.0249	0.00947523
PM23	H8	Sodium cyanide	0.021	0.0294	0.0252	0.0059397
PM23	H9	Sodium thiosulfate	0.0013	0.0018	0.00155	0.000353553
PM23	H10	Sodium thiosulfate	0.0009	0.0008	0.00085	7.07107e-05
PM23	H11	Sodium thiosulfate	0.0015	0.0011	0.0013	0.000282843
PM23	H12	Sodium thiosulfate	0.0018	0.0003	0.00105	0.00106066
PM24	A1	Apramycin	0.0544	0.048	0.0512	0.00452548
PM24	A2	Apramycin	0.1105	0.0526	0.08155	0.0409415
PM24	A3	Apramycin	0.1352	0.0649	0.10005	0.0497096
PM24	A4	Apramycin	0.1735	0.1006	0.13705	0.0515481
PM24	A5	9-Aminoacridine	0.087	0.0916	0.0893	0.00325269
PM24	A6	9-Aminoacridine	0.1247	0.1626	0.14365	0.0267993
PM24	A7	9-Aminoacridine	0.1283	0.2201	0.1742	0.0649124
PM24	A8	9-Aminoacridine	0.1545	0.1316	0.14305	0.0161927
PM24	A9	Zaragozic acid A	0.0278	0.0723	0.05005	0.0314663
PM24	A10	Zaragozic acid A	0.0285	0.0856	0.05705	0.0403758
PM24	A11	Zaragozic acid A	0.1238	0.235	0.1794	0.0786303
PM24	A12	Zaragozic acid A	0.8229	0.3927	0.6078	0.304197
PM24	B1	Blasticidin S	0.023	0.0381	0.03055	0.0106773
PM24	B2	Blasticidin S	0.0233	0.0345	0.0289	0.0079196
PM24	B3	Blasticidin S	0.0233	0.0355	0.0294	0.0086267
PM24	B4	Blasticidin S	0.0228	0.0399	0.03135	0.0120915
PM24	B5	Thioridazine	0.041	0.0723	0.05665	0.0221324
PM24	B6	Thioridazine	0.2051	0.3447	0.2749	0.0987121
PM24	B7	Thioridazine	0.0246	0.0359	0.03025	0.00799031
PM24	B8	Thioridazine	0.0239	0.0333	0.0286	0.0066468
PM24	B9	Sodium benzoate	0.0269	0.0966	0.06175	0.0492853
PM24	B10	Sodium benzoate	0.04	0.036	0.038	0.00282843
PM24	B11	Sodium benzoate	0.0269	0.035	0.03095	0.00572756
PM24	B12	Sodium benzoate	0.0272	0.1507	0.08895	0.0873277
PM24	C1	Chlortetracycline	0.1253	0.3234	0.22435	0.140078
PM24	C2	Chlortetracycline	0.1285	0.2505	0.1895	0.086267
PM24	C3	Chlortetracycline	0.0268	0.0351	0.03095	0.00586899
PM24	C4	Chlortetracycline	0.0632	0.0801	0.07165	0.0119501
PM24	C5	Sodium metasilicate	0.0272	0.0438	0.0355	0.011738
PM24	C6	Sodium metasilicate	0.0554	0.0521	0.05375	0.00233345
PM24	C7	Sodium metasilicate	0.0507	0.0458	0.04825	0.00346482
PM24	C8	Sodium metasilicate	0.0336	0.0392	0.0364	0.0039598
PM24	C9	Pentamidine isethionate	0.0523	0.156	0.10415	0.073327
PM24	C10	Pentamidine isethionate	0.0388	0.0511	0.04495	0.00869741
PM24	C11	Pentamidine isethionate	0.0293	0.0441	0.0367	0.0104652
PM24	C12	Pentamidine isethionate	0.0325	0.0399	0.0362	0.00523259
PM24	D1	6-Azauracil	0.0252	0.0548	0.04	0.0209304
PM24	D2	6-Azauracil	0.0253	0.0591	0.0422	0.0239002
PM24	D3	6-Azauracil	0.0253	0.0372	0.03125	0.00841457
PM24	D4	6-Azauracil	0.026	0.0391	0.03255	0.0092631
PM24	D5	Potassium chromate	0.0358	0.045	0.0404	0.00650538
PM24	D6	Potassium chromate	0.0291	0.0426	0.03585	0.00954594
PM24	D7	Potassium chromate	0.0332	0.0557	0.04445	0.0159099
PM24	D8	Potassium chromate	0.0402	0.0475	0.04385	0.00516188
PM24	D9	Thialysine	0.0264	0.0357	0.03105	0.00657609
PM24	D10	Thialysine	0.0278	0.034	0.0309	0.00438406
PM24	D11	Thialysine	0.0258	0.0427	0.03425	0.0119501
PM24	D12	Thialysine	0.0257	0.0486	0.03715	0.0161927
PM24	E1	Berberine chloride	0.3411	0.278	0.30955	0.0446184
PM24	E2	Berberine chloride	0.762	0.727	0.7445	0.0247487
PM24	E3	Berberine chloride	0.1452	0.2074	0.1763	0.043982
PM24	E4	Berberine chloride	0.3217	0.2697	0.2957	0.0367696
PM24	E5	EGTA	0.0402	0.086	0.0631	0.0323855
PM24	E6	EGTA	0.0421	0.0352	0.03865	0.00487904
PM24	E7	EGTA	0.0418	0.0644	0.0531	0.0159806
PM24	E8	EGTA	0.051	0.0846	0.0678	0.0237588
PM24	E9	Sodium pyrophosphate	0.2019	0.3606	0.28125	0.112218
PM24	E10	Sodium pyrophosphate	0.059	0.0419	0.05045	0.0120915
PM24	E11	Sodium pyrophosphate	0.0247	0.0493	0.037	0.0173948
PM24	E12	Sodium pyrophosphate	0.0223	0.0393	0.0308	0.0120208
PM24	F1	Isoniazid	0.0033	0.0077	0.0055	0.00311127
PM24	F2	Isoniazid	0.0019	0.0051	0.0035	0.00226274
PM24	F3	Isoniazid	0.0014	0.0045	0.00295	0.00219203
PM24	F4	Isoniazid	0.002	0.003	0.0025	0.000707107
PM24	F5	Methyl viologen	0.0647	0.084	0.07435	0.0136472
PM24	F6	Methyl viologen	0.0438	0.079	0.0614	0.0248902
PM24	F7	Methyl viologen	0.0259	0.0408	0.03335	0.0105359
PM24	F8	Methyl viologen	0.024	0.0585	0.04125	0.0243952
PM24	F9	Sodium fluoride	0.1453	0.0965	0.1209	0.0345068
PM24	F10	Sodium fluoride	0.0356	0.0931	0.06435	0.0406586
PM24	F11	Sodium fluoride	0.0747	0.0557	0.0652	0.013435
PM24	F12	Sodium fluoride	0.0316	0.0511	0.04135	0.0137886
PM24	G1	Cisplatin	0.0801	0.0392	0.05965	0.0289207
PM24	G2	Cisplatin	0.0257	0.0336	0.02965	0.00558614
PM24	G3	Cisplatin	0.0272	0.0355	0.03135	0.00586899
PM24	G4	Cisplatin	0.0268	0.0358	0.0313	0.00636396
PM24	G5	Aluminum sulfate	0.0378	0.0394	0.0386	0.00113137
PM24	G6	Aluminum sulfate	0.0524	0.0407	0.04655	0.00827315
PM24	G7	Aluminum sulfate	0.0278	0.09	0.0589	0.043982
PM24	G8	Aluminum sulfate	0.0253	0.0347	0.03	0.0066468
PM24	G9	Fluconazole	0.0264	0.1167	0.07155	0.0638517
PM24	G10	Fluconazole	0.2823	0.2907	0.2865	0.0059397
PM24	G11	Fluconazole	0.4129	0.1359	0.2744	0.195869
PM24	G12	Fluconazole	0.5083	0.1849	0.3466	0.228678
PM24	H1	Propiconazole	0.2201	0.3688	0.29445	0.105147
PM24	H2	Propiconazole	0.0492	0.2518	0.1505	0.14326
PM24	H3	Propiconazole	0.0373	0.2988	0.16805	0.184908
PM24	H4	Propiconazole	0.0222	0.2234	0.1228	0.14227
PM24	H5	Tamoxifen	0.1476	0.211	0.1793	0.0448306
PM24	H6	Tamoxifen	0.025	0.034	0.0295	0.00636396
PM24	H7	Tamoxifen	0.0261	0.0362	0.03115	0.00714178
PM24	H8	Tamoxifen	0.026	0.0376	0.0318	0.00820244
PM24	H9	Miconazole	0.0349	0.0441	0.0395	0.00650538
PM24	H10	Miconazole	0.024	0.1236	0.0738	0.0704278
PM24	H11	Miconazole	0.0299	0.4224	0.22615	0.277539
PM24	H12	Miconazole	0.0232	0.0392	0.0312	0.0113137
PM25	A1	Hydroxyurea	0.0014	0.0011	0.00125	0.000212132
PM25	A2	Hydroxyurea	0.0013	0.0018	0.00155	0.000353553
PM25	A3	Hydroxyurea	0.0006	0.0019	0.00125	0.000919239
PM25	A4	Hydroxyurea	0.001	0.0022	0.0016	0.000848528
PM25	A5	Tobramycin	0.0375	0.0456	0.04155	0.00572756
PM25	A6	Tobramycin	0.0233	0.0319	0.0276	0.00608112
PM25	A7	Tobramycin	0.0009	0.0022	0.00155	0.000919239
PM25	A8	Tobramycin	0.0017	0.0051	0.0034	0.00240416
PM25	A9	Niaproof	0.0261	0.0326	0.02935	0.00459619
PM25	A10	Niaproof	0.3761	0.3756	0.37585	0.000353553
PM25	A11	Niaproof	0.0255	0.0241	0.0248	0.000989949
PM25	A12	Niaproof	0.0248	0.0334	0.0291	0.00608112
PM25	B1	b-Chloro-L-alanine	0.0418	0.0538	0.0478	0.00848528
PM25	B2	b-Chloro-L-alanine	0.0541	0.043	0.04855	0.00784889
PM25	B3	b-Chloro-L-alanine	0.0836	0.0413	0.06245	0.0299106
PM25	B4	b-Chloro-L-alanine	0.0908	0.0433	0.06705	0.0335876
PM25	B5	Tetrazolium Violet	0.0286	0.037	0.0328	0.0059397
PM25	B6	Tetrazolium Violet	0.0312	0.0396	0.0354	0.0059397
PM25	B7	Tetrazolium Violet	0.0439	0.0509	0.0474	0.00494975
PM25	B8	Tetrazolium Violet	0.1181	0.1128	0.11545	0.00374767
PM25	B9	Kanamycin	0.0563	0.0486	0.05245	0.00544472
PM25	B10	Kanamycin	0.0156	0.0329	0.02425	0.0122329
PM25	B11	Kanamycin	0.008	0.0043	0.00615	0.0026163
PM25	B12	Kanamycin	0.0016	0.069	0.0353	0.047659
PM25	C1	4-Aminopyridine	0.0745	0.0718	0.07315	0.00190919
PM25	C2	4-Aminopyridine	0.0695	0.1734	0.12145	0.0734684
PM25	C3	4-Aminopyridine	0.0203	0.0251	0.0227	0.00339411
PM25	C4	4-Aminopyridine	0.0255	0.0335	0.0295	0.00565685
PM25	C5	Amitriptyline	0.0259	0.0327	0.0293	0.00480833
PM25	C6	Amitriptyline	0.0239	0.0307	0.0273	0.00480833
PM25	C7	Amitriptyline	0.0227	0.0315	0.0271	0.00622254
PM25	C8	Amitriptyline	0.3076	0.293	0.3003	0.0103238
PM25	C9	4-Nitroquinoline N-oxide	0.0455	0.0404	0.04295	0.00360624
PM25	C10	4-Nitroquinoline N-oxide	0.0725	0.0461	0.0593	0.0186676
PM25	C11	4-Nitroquinoline N-oxide	0.06	0.0561	0.05805	0.00275772
PM25	C12	4-Nitroquinoline N-oxide	0.0262	0.0325	0.02935	0.00445477
PM25	D1	Alexidine	0.0264	0.0324	0.0294	0.00424264
PM25	D2	Alexidine	0.025	0.0328	0.0289	0.00551543
PM25	D3	Alexidine	0.0253	0.0336	0.02945	0.00586899
PM25	D4	Alexidine	0.0252	0.0326	0.0289	0.00523259
PM25	D5	Hygromycin B	0.0242	0.2073	0.11575	0.129471
PM25	D6	Hygromycin B	0.0253	0.0336	0.02945	0.00586899
PM25	D7	Hygromycin B	0.0232	0.0305	0.02685	0.00516188
PM25	D8	Hygromycin B	0.0212	0.0273	0.02425	0.00431335
PM25	D9	5-Fluorodeoxyuridine	0.0256	0.0328	0.0292	0.00509117
PM25	D10	5-Fluorodeoxyuridine	0.025	0.0317	0.02835	0.00473762
PM25	D11	5-Fluorodeoxyuridine	0.0236	0.0299	0.02675	0.00445477
PM25	D12	5-Fluorodeoxyuridine	0.0221	0.0265	0.0243	0.00311127
PM25	E1	Sodium salicylate	0.1877	0.16	0.17385	0.0195869
PM25	E2	Sodium salicylate	0.5856	0.4262	0.5059	0.112713
PM25	E3	Sodium salicylate	0.0244	0.0197	0.02205	0.0033234
PM25	E4	Sodium salicylate	0.0236	0.0015	0.01255	0.0156271
PM25	E5	Succinic acid	0.1178	0.0708	0.0943	0.033234
PM25	E6	Succinic acid	0.0328	0.0317	0.03225	0.000777817
PM25	E7	Succinic acid	0.0282	0.0319	0.03005	0.0026163
PM25	E8	Succinic acid	0.0217	0.0295	0.0256	0.00551543
PM25	E9	Clomiphene	0.1352	0.0329	0.08405	0.072337
PM25	E10	Clomiphene	0.0266	0.0337	0.03015	0.00502046
PM25	E11	Clomiphene	0.0262	0.0333	0.02975	0.00502046
PM25	E12	Clomiphene	0.0275	0.0351	0.0313	0.00537401
PM25	F1	DL-Malic acid	0.027	0.0342	0.0306	0.00509117
PM25	F2	DL-Malic acid	0.0286	0.035	0.0318	0.00452548
PM25	F3	DL-Malic acid	0.0287	0.036	0.03235	0.00516188
PM25	F4	DL-Malic acid	0.0289	0.037	0.03295	0.00572756
PM25	F5	Tartaric acid	0.0255	0.0334	0.02945	0.00558614
PM25	F6	Tartaric acid	0.0274	0.0351	0.03125	0.00544472
PM25	F7	Tartaric acid	0.0316	0.0355	0.03355	0.00275772
PM25	F8	Tartaric acid	0.0298	0.0369	0.03335	0.00502046
PM25	F9	Fumaric acid	0.1601	0.0421	0.1011	0.0834386
PM25	F10	Fumaric acid	0.2798	0.195	0.2374	0.0599627
PM25	F11	Fumaric acid	0.0346	0.0377	0.03615	0.00219203
PM25	F12	Fumaric acid	0.0235	0.0317	0.0276	0.00579828
PM25	G1	5-Fluorocytosine	0.0975	0.0626	0.08005	0.024678
PM25	G2	5-Fluorocytosine	0.0233	0.04	0.03165	0.0118087
PM25	G3	5-Fluorocytosine	0.0227	0.0318	0.02725	0.00643467
PM25	G4	5-Fluorocytosine	0.0236	0.0323	0.02795	0.00615183
PM25	G5	Palladium(II) chloride	0.0255	0.0428	0.03415	0.0122329
PM25	G6	Palladium(II) chloride	0.0237	0.0324	0.02805	0.00615183
PM25	G7	Palladium(II) chloride	0.0262	0.0327	0.02945	0.00459619
PM25	G8	Palladium(II) chloride	0.0257	0.0353	0.0305	0.00678823
PM25	G9	Ibuprofen	0.0743	0.0454	0.05985	0.0204354
PM25	G10	Ibuprofen	0.0447	0.0582	0.05145	0.00954594
PM25	G11	Ibuprofen	0.0387	0.0699	0.0543	0.0220617
PM25	G12	Ibuprofen	0.0194	0.0425	0.03095	0.0163342
PM25	H1	Chloroquine	0.0327	0.0364	0.03455	0.0026163
PM25	H2	Chloroquine	0.0269	0.0306	0.02875	0.0026163
PM25	H3	Chloroquine	0.0257	0.0278	0.02675	0.00148492
PM25	H4	Chloroquine	0.0227	0.0244	0.02355	0.00120208
PM25	H5	trans-Cinnamic acid	0.1151	0.1013	0.1082	0.00975807
PM25	H6	trans-Cinnamic acid	0.0946	0.0662	0.0804	0.0200818
PM25	H7	trans-Cinnamic acid	0.0243	0.502	0.26315	0.337785
PM25	H8	trans-Cinnamic acid	0.0074	0.0193	0.01335	0.00841457
PM25	H9	5-Fluorouracil	0.0267	0.0334	0.03005	0.00473762
PM25	H10	5-Fluorouracil	0.0283	0.0338	0.03105	0.00388909
PM25	H11	5-Fluorouracil	0.0269	0.0328	0.02985	0.00417193
PM25	H12	5-Fluorouracil	0.0255	0.0315	0.0285	0.00424264
