# Supplementary material for: Phenothiazines Rapidly Induce Laccase Expression and Lignin-Degrading Properties in the White-Rot Fungus Phlebia radiata
Source: J Fungi (Basel). 2023 Mar 18;9(3):371. doi: 10.3390/jof9030371 (PMC10053029; doi:10.3390/jof9030371)
Supplement: Supplementary file 1 [file jof-09-00371-s001.zip › SupplementaryData_RNAseq_Counts_TPM.xlsx]

## Sheet: metadata
sample	condition
S01_quant	Control-2h
S02_quant	Control-2h
S03_quant	Control-2h
S04_quant	PMZ-2h
S05_quant	PMZ-2h
S06_quant	PMZ-2h
S07_quant	Control-24h
S08_quant	Control-24h
S09_quant	Control-24h
S10_quant	PMZ-24h
S11_quant	PMZ-24h
S12_quant	PMZ-24h
S13_quant	Control-48h
S14_quant	Control-48h
S15_quant	Control-48h
S16_quant	PMZ-48h
S17_quant	PMZ-48h
S18_quant	PMZ-48h

## Sheet: 2hr-tpm
target_id	sample	est_counts	tpm	eff_len	len
jgi|Phlrad1|132012|plus.g3673.t1	S01_quant	0	0	585.609	729
jgi|Phlrad1|132012|plus.g3673.t1	S02_quant	0	0	577.44	729
jgi|Phlrad1|132012|plus.g3673.t1	S03_quant	0	0	570.348	729
jgi|Phlrad1|132012|plus.g3673.t1	S04_quant	0	0	584.227	729
jgi|Phlrad1|132012|plus.g3673.t1	S05_quant	0	0	566.348	729
jgi|Phlrad1|132012|plus.g3673.t1	S06_quant	0	0	569.627	729
jgi|Phlrad1|132013|plus.g3674.t1	S01_quant	0	0	4131.61	4275
jgi|Phlrad1|132013|plus.g3674.t1	S02_quant	0	0	4123.44	4275
jgi|Phlrad1|132013|plus.g3674.t1	S03_quant	0	0	4116.35	4275
jgi|Phlrad1|132013|plus.g3674.t1	S04_quant	0	0	4130.23	4275
jgi|Phlrad1|132013|plus.g3674.t1	S05_quant	0	0	4112.35	4275
jgi|Phlrad1|132013|plus.g3674.t1	S06_quant	0	0	4115.63	4275
jgi|Phlrad1|132014|minus.g3636.t1	S01_quant	0	0	603.609	747
jgi|Phlrad1|132014|minus.g3636.t1	S02_quant	0	0	595.44	747
jgi|Phlrad1|132014|minus.g3636.t1	S03_quant	0	0	588.348	747
jgi|Phlrad1|132014|minus.g3636.t1	S04_quant	0	0	602.227	747
jgi|Phlrad1|132014|minus.g3636.t1	S05_quant	0	0	584.348	747
jgi|Phlrad1|132014|minus.g3636.t1	S06_quant	0	0	587.627	747
jgi|Phlrad1|132015|plus.g3676.t1	S01_quant	0	0	226.096	366
jgi|Phlrad1|132015|plus.g3676.t1	S02_quant	0	0	218.119	366
jgi|Phlrad1|132015|plus.g3676.t1	S03_quant	0.547108	0.447372	213.343	366
jgi|Phlrad1|132015|plus.g3676.t1	S04_quant	5.99627	4.73225	224.634	366
jgi|Phlrad1|132015|plus.g3676.t1	S05_quant	0.0739715	0.0618085	207.564	366
jgi|Phlrad1|132015|plus.g3676.t1	S06_quant	1.93592	1.58969	212.418	366
jgi|Phlrad1|132016|minus.g3638.t1	S01_quant	0	0	355.12	498
jgi|Phlrad1|132016|minus.g3638.t1	S02_quant	0	0	346.717	498
jgi|Phlrad1|132016|minus.g3638.t1	S03_quant	0	0	340.34	498
jgi|Phlrad1|132016|minus.g3638.t1	S04_quant	0	0	353.672	498
jgi|Phlrad1|132016|minus.g3638.t1	S05_quant	0	0	335.733	498
jgi|Phlrad1|132016|minus.g3638.t1	S06_quant	0	0	339.446	498
jgi|Phlrad1|132017|minus.g3639.t1	S01_quant	36.7073	9.61233	678.609	822
jgi|Phlrad1|132017|minus.g3639.t1	S02_quant	46.0761	12.0865	670.44	822
jgi|Phlrad1|132017|minus.g3639.t1	S03_quant	41.6122	10.9434	663.348	822
jgi|Phlrad1|132017|minus.g3639.t1	S04_quant	43.486	11.3835	677.227	822
jgi|Phlrad1|132017|minus.g3639.t1	S05_quant	30.0862	7.91388	659.348	822
jgi|Phlrad1|132017|minus.g3639.t1	S06_quant	50.7815	13.3676	662.627	822
jgi|Phlrad1|132018|minus.g3640.t1	S01_quant	1004.35	339.562	525.609	669
jgi|Phlrad1|132018|minus.g3640.t1	S02_quant	1130.55	384.251	517.44	669
jgi|Phlrad1|132018|minus.g3640.t1	S03_quant	911.308	311.443	510.458	669
jgi|Phlrad1|132018|minus.g3640.t1	S04_quant	586.191	198.235	524.227	669
jgi|Phlrad1|132018|minus.g3640.t1	S05_quant	784.066	268.559	506.348	669
jgi|Phlrad1|132018|minus.g3640.t1	S06_quant	656.985	224.864	509.627	669
jgi|Phlrad1|132019|minus.g3641.t1	S01_quant	252.872	53.078	846.609	990
jgi|Phlrad1|132019|minus.g3641.t1	S02_quant	284.323	59.6384	838.44	990
jgi|Phlrad1|132019|minus.g3641.t1	S03_quant	218.464	45.8427	831.348	990
jgi|Phlrad1|132019|minus.g3641.t1	S04_quant	319.187	66.9473	845.227	990
jgi|Phlrad1|132019|minus.g3641.t1	S05_quant	309.979	64.9802	827.348	990
jgi|Phlrad1|132019|minus.g3641.t1	S06_quant	311.036	65.3163	830.627	990
jgi|Phlrad1|132020|plus.g3680.t1	S01_quant	128.476	13.2766	1719.61	1863
jgi|Phlrad1|132020|plus.g3680.t1	S02_quant	137.104	14.0889	1711.44	1863
jgi|Phlrad1|132020|plus.g3680.t1	S03_quant	119.635	12.2454	1704.35	1863
jgi|Phlrad1|132020|plus.g3680.t1	S04_quant	152.201	15.7036	1718.23	1863
jgi|Phlrad1|132020|plus.g3680.t1	S05_quant	138.579	14.135	1700.35	1863
jgi|Phlrad1|132020|plus.g3680.t1	S06_quant	158.692	16.2479	1703.63	1863
jgi|Phlrad1|132021|minus.g3643.t1	S01_quant	338.523	34.0907	1764.61	1908
jgi|Phlrad1|132021|minus.g3643.t1	S02_quant	331.523	33.1945	1756.44	1908
jgi|Phlrad1|132021|minus.g3643.t1	S03_quant	344.341	34.3388	1749.35	1908
jgi|Phlrad1|132021|minus.g3643.t1	S04_quant	351.367	35.3276	1763.23	1908
jgi|Phlrad1|132021|minus.g3643.t1	S05_quant	323.655	32.1615	1745.35	1908
jgi|Phlrad1|132021|minus.g3643.t1	S06_quant	325.848	32.5038	1748.63	1908
jgi|Phlrad1|132022|plus.g3682.t1	S01_quant	258.99	30.6699	1500.61	1644
jgi|Phlrad1|132022|plus.g3682.t1	S02_quant	196.666	23.1749	1492.44	1644
jgi|Phlrad1|132022|plus.g3682.t1	S03_quant	262.157	30.7897	1485.35	1644
jgi|Phlrad1|132022|plus.g3682.t1	S04_quant	286.138	33.8352	1499.23	1644
jgi|Phlrad1|132022|plus.g3682.t1	S05_quant	276.246	32.3427	1481.35	1644
jgi|Phlrad1|132022|plus.g3682.t1	S06_quant	279.298	32.8146	1484.63	1644
jgi|Phlrad1|132023|minus.g3645.t1	S01_quant	83.611	11.9571	1242.61	1386
jgi|Phlrad1|132023|minus.g3645.t1	S02_quant	78.6665	11.2074	1234.44	1386
jgi|Phlrad1|132023|minus.g3645.t1	S03_quant	70.7408	10.0548	1227.35	1386
jgi|Phlrad1|132023|minus.g3645.t1	S04_quant	77.4051	11.0555	1241.23	1386
jgi|Phlrad1|132023|minus.g3645.t1	S05_quant	89.347	12.6668	1223.35	1386
jgi|Phlrad1|132023|minus.g3645.t1	S06_quant	72.9984	10.3805	1226.63	1386
jgi|Phlrad1|132024|minus.g3646.t1	S01_quant	16.3144	15.2924	189.579	327
jgi|Phlrad1|132024|minus.g3646.t1	S02_quant	15.7333	15.1817	182.258	327
jgi|Phlrad1|132024|minus.g3646.t1	S03_quant	18.7255	18.3276	178.238	327
jgi|Phlrad1|132024|minus.g3646.t1	S04_quant	20.0036	18.8505	188.125	327
jgi|Phlrad1|132024|minus.g3646.t1	S05_quant	30.9979	31.3554	171.458	327
jgi|Phlrad1|132024|minus.g3646.t1	S06_quant	16.9272	16.6508	177.323	327
jgi|Phlrad1|132025|minus.g3647.t1	S01_quant	104.004	18.4891	999.609	1143
jgi|Phlrad1|132025|minus.g3647.t1	S02_quant	100.019	17.7419	991.44	1143
jgi|Phlrad1|132025|minus.g3647.t1	S03_quant	121.716	21.571	984.348	1143
jgi|Phlrad1|132025|minus.g3647.t1	S04_quant	132.197	23.4777	998.227	1143
jgi|Phlrad1|132025|minus.g3647.t1	S05_quant	122.168	21.613	980.348	1143
jgi|Phlrad1|132025|minus.g3647.t1	S06_quant	115.316	20.4492	983.627	1143
jgi|Phlrad1|132026|minus.g3648.t1	S01_quant	136.633	17.3602	1398.61	1542
jgi|Phlrad1|132026|minus.g3648.t1	S02_quant	171.942	21.7479	1390.44	1542
jgi|Phlrad1|132026|minus.g3648.t1	S03_quant	140.441	17.7107	1383.35	1542
jgi|Phlrad1|132026|minus.g3648.t1	S04_quant	145.243	18.4285	1397.23	1542
jgi|Phlrad1|132026|minus.g3648.t1	S05_quant	188.723	23.7294	1379.35	1542
jgi|Phlrad1|132026|minus.g3648.t1	S06_quant	156.576	19.7532	1382.63	1542
jgi|Phlrad1|132027|plus.g3686.t1	S01_quant	147.849	27.4363	957.609	1101
jgi|Phlrad1|132027|plus.g3686.t1	S02_quant	146.095	27.0616	949.44	1101
jgi|Phlrad1|132027|plus.g3686.t1	S03_quant	167.489	31.0062	942.348	1101
jgi|Phlrad1|132027|plus.g3686.t1	S04_quant	150.462	27.895	956.227	1101
jgi|Phlrad1|132027|plus.g3686.t1	S05_quant	162.283	29.9948	938.348	1101
jgi|Phlrad1|132027|plus.g3686.t1	S06_quant	176.677	32.7279	941.627	1101
jgi|Phlrad1|132028|plus.g3687.t1	S01_quant	1.01965	1.59326	113.726	240
jgi|Phlrad1|132028|plus.g3687.t1	S02_quant	2.24761	3.63565	108.724	240
jgi|Phlrad1|132028|plus.g3687.t1	S03_quant	1.04031	1.6863	107.621	240
jgi|Phlrad1|132028|plus.g3687.t1	S04_quant	0.86972	1.37223	112.361	240
jgi|Phlrad1|132028|plus.g3687.t1	S05_quant	2.73511	4.73276	100.23	240
jgi|Phlrad1|132028|plus.g3687.t1	S06_quant	1.05795	1.73411	106.415	240
jgi|Phlrad1|132029|minus.g3650.t1	S01_quant	380.328	27.2017	2484.61	2628
jgi|Phlrad1|132029|minus.g3650.t1	S02_quant	316.913	22.506	2476.44	2628
jgi|Phlrad1|132029|minus.g3650.t1	S03_quant	310.011	21.9012	2469.35	2628
jgi|Phlrad1|132029|minus.g3650.t1	S04_quant	220.039	15.7089	2483.23	2628
jgi|Phlrad1|132029|minus.g3650.t1	S05_quant	283.54	19.9468	2465.35	2628
jgi|Phlrad1|132029|minus.g3650.t1	S06_quant	267.661	18.9124	2468.63	2628
jgi|Phlrad1|132030|minus.g3651.t1	S01_quant	141.731	19.9319	1263.61	1407
jgi|Phlrad1|132030|minus.g3651.t1	S02_quant	149.466	20.9379	1255.44	1407
jgi|Phlrad1|132030|minus.g3651.t1	S03_quant	169.57	23.6966	1248.35	1407
jgi|Phlrad1|132030|minus.g3651.t1	S04_quant	160.898	22.5983	1262.23	1407
jgi|Phlrad1|132030|minus.g3651.t1	S05_quant	165.93	23.127	1244.35	1407
jgi|Phlrad1|132030|minus.g3651.t1	S06_quant	139.649	19.524	1247.63	1407
jgi|Phlrad1|132031|minus.g3652.t1	S01_quant	152.947	20.3041	1338.61	1482
jgi|Phlrad1|132031|minus.g3652.t1	S02_quant	167.447	22.1344	1330.44	1482
jgi|Phlrad1|132031|minus.g3652.t1	S03_quant	170.61	22.4907	1323.35	1482
jgi|Phlrad1|132031|minus.g3652.t1	S04_quant	133.067	17.6412	1337.23	1482
jgi|Phlrad1|132031|minus.g3652.t1	S05_quant	134.932	17.7375	1319.35	1482
jgi|Phlrad1|132031|minus.g3652.t1	S06_quant	150.229	19.8121	1322.63	1482
jgi|Phlrad1|132032|plus.g3690.t1	S01_quant	355.857	106.89	591.609	735
jgi|Phlrad1|132032|plus.g3690.t1	S02_quant	279.828	84.3491	583.44	735
jgi|Phlrad1|132032|plus.g3690.t1	S03_quant	202.86	61.4022	576.348	735
jgi|Phlrad1|132032|plus.g3690.t1	S04_quant	258.307	77.585	590.227	735
jgi|Phlrad1|132032|plus.g3690.t1	S05_quant	258.012	78.1837	572.348	735
jgi|Phlrad1|132032|plus.g3690.t1	S06_quant	217.937	66.0399	575.627	735
jgi|Phlrad1|132033|plus.g3691.t2	S01_quant	0	0	5382.61	5526
jgi|Phlrad1|132033|plus.g3691.t2	S02_quant	1.12381	0.0367743	5374.44	5526
jgi|Phlrad1|132033|plus.g3691.t2	S03_quant	0	0	5367.35	5526
jgi|Phlrad1|132033|plus.g3691.t2	S04_quant	2.45099	0.080746	5381.23	5526
jgi|Phlrad1|132033|plus.g3691.t2	S05_quant	1.28038	0.0414038	5363.35	5526
jgi|Phlrad1|132033|plus.g3691.t2	S06_quant	0	0	5366.63	5526
jgi|Phlrad1|132034|plus.g3691.t1	S01_quant	3.05894	0.347647	1563.61	1707
jgi|Phlrad1|132034|plus.g3691.t1	S02_quant	0	0	1555.44	1707
jgi|Phlrad1|132034|plus.g3691.t1	S03_quant	1.04031	0.11721	1548.35	1707
jgi|Phlrad1|132034|plus.g3691.t1	S04_quant	1.02789	0.116645	1562.23	1707
jgi|Phlrad1|132034|plus.g3691.t1	S05_quant	1.45473	0.16337	1544.35	1707
jgi|Phlrad1|132034|plus.g3691.t1	S06_quant	2.11589	0.238476	1547.63	1707
jgi|Phlrad1|132035|minus.g3654.t1	S01_quant	0	0	750.609	894
jgi|Phlrad1|132035|minus.g3654.t1	S02_quant	0	0	742.44	894
jgi|Phlrad1|132035|minus.g3654.t1	S03_quant	0	0	735.348	894
jgi|Phlrad1|132035|minus.g3654.t1	S04_quant	0	0	749.227	894
jgi|Phlrad1|132035|minus.g3654.t1	S05_quant	0	0	731.348	894
jgi|Phlrad1|132035|minus.g3654.t1	S06_quant	0	0	734.627	894
jgi|Phlrad1|132036|plus.g3693.t1	S01_quant	0	0	1098.61	1242
jgi|Phlrad1|132036|plus.g3693.t1	S02_quant	0	0	1090.44	1242
jgi|Phlrad1|132036|plus.g3693.t1	S03_quant	0	0	1083.35	1242
jgi|Phlrad1|132036|plus.g3693.t1	S04_quant	0	0	1097.23	1242
jgi|Phlrad1|132036|plus.g3693.t1	S05_quant	0	0	1079.35	1242
jgi|Phlrad1|132036|plus.g3693.t1	S06_quant	0	0	1082.63	1242
jgi|Phlrad1|132037|plus.g3694.t1	S01_quant	1.01965	0.139423	1299.61	1443
jgi|Phlrad1|132037|plus.g3694.t1	S02_quant	0	0	1291.44	1443
jgi|Phlrad1|132037|plus.g3694.t1	S03_quant	2.08061	0.282606	1284.35	1443
jgi|Phlrad1|132037|plus.g3694.t1	S04_quant	0	0	1298.23	1443
jgi|Phlrad1|132037|plus.g3694.t1	S05_quant	0	0	1280.35	1443
jgi|Phlrad1|132037|plus.g3694.t1	S06_quant	0	0	1283.63	1443
jgi|Phlrad1|132038|plus.g3695.t1	S01_quant	0	0	2514.61	2658
jgi|Phlrad1|132038|plus.g3695.t1	S02_quant	0	0	2506.44	2658
jgi|Phlrad1|132038|plus.g3695.t1	S03_quant	0	0	2499.35	2658
jgi|Phlrad1|132038|plus.g3695.t1	S04_quant	0	0	2513.23	2658
jgi|Phlrad1|132038|plus.g3695.t1	S05_quant	0	0	2495.35	2658
jgi|Phlrad1|132038|plus.g3695.t1	S06_quant	0	0	2498.63	2658
jgi|Phlrad1|132039|plus.g3696.t1	S01_quant	0	0	3843.61	3987
jgi|Phlrad1|132039|plus.g3696.t1	S02_quant	0	0	3835.44	3987
jgi|Phlrad1|132039|plus.g3696.t1	S03_quant	0	0	3828.35	3987
jgi|Phlrad1|132039|plus.g3696.t1	S04_quant	0	0	3842.23	3987
jgi|Phlrad1|132039|plus.g3696.t1	S05_quant	0	0	3824.35	3987
jgi|Phlrad1|132039|plus.g3696.t1	S06_quant	0	0	3827.63	3987
jgi|Phlrad1|132040|plus.g3697.t1	S01_quant	14.2751	3.49119	726.609	870
jgi|Phlrad1|132040|plus.g3697.t1	S02_quant	16.8571	4.12646	718.44	870
jgi|Phlrad1|132040|plus.g3697.t1	S03_quant	14.5643	3.57174	711.348	870
jgi|Phlrad1|132040|plus.g3697.t1	S04_quant	5.21832	1.27561	725.227	870
jgi|Phlrad1|132040|plus.g3697.t1	S05_quant	14.5873	3.57666	707.348	870
jgi|Phlrad1|132040|plus.g3697.t1	S06_quant	9.52152	2.33712	710.627	870
jgi|Phlrad1|132041|minus.g3661.t1	S01_quant	13.2554	1.55418	1515.61	1659
jgi|Phlrad1|132041|minus.g3661.t1	S02_quant	38.2094	4.45776	1507.44	1659
jgi|Phlrad1|132041|minus.g3661.t1	S03_quant	29.1286	3.38688	1500.35	1659
jgi|Phlrad1|132041|minus.g3661.t1	S04_quant	31.3099	3.66566	1514.23	1659
jgi|Phlrad1|132041|minus.g3661.t1	S05_quant	37.3799	4.33253	1496.35	1659
jgi|Phlrad1|132041|minus.g3661.t1	S06_quant	28.5646	3.32247	1499.63	1659
jgi|Phlrad1|132042|minus.g3662.t1	S01_quant	8.35976	2.19884	675.609	819
jgi|Phlrad1|132042|minus.g3662.t1	S02_quant	14.6095	3.84954	667.44	819
jgi|Phlrad1|132042|minus.g3662.t1	S03_quant	12.4837	3.29794	660.348	819
jgi|Phlrad1|132042|minus.g3662.t1	S04_quant	14.7852	3.88762	674.227	819
jgi|Phlrad1|132042|minus.g3662.t1	S05_quant	13.6756	3.61366	656.348	819
jgi|Phlrad1|132042|minus.g3662.t1	S06_quant	19.043	5.03564	659.627	819
jgi|Phlrad1|132043|minus.g3663.t1	S01_quant	9.17682	2.67508	609.609	753
jgi|Phlrad1|132043|minus.g3663.t1	S02_quant	8.99045	2.62891	601.44	753
jgi|Phlrad1|132043|minus.g3663.t1	S03_quant	14.5643	4.27485	594.348	753
jgi|Phlrad1|132043|minus.g3663.t1	S04_quant	11.3064	3.29548	608.227	753
jgi|Phlrad1|132043|minus.g3663.t1	S05_quant	14.5873	4.28551	590.348	753
jgi|Phlrad1|132043|minus.g3663.t1	S06_quant	8.46358	2.48689	593.627	753
jgi|Phlrad1|132044|minus.g3664.t1	S01_quant	132.554	8.93056	2637.61	2781
jgi|Phlrad1|132044|minus.g3664.t1	S02_quant	126.99	8.49362	2629.44	2781
jgi|Phlrad1|132044|minus.g3664.t1	S03_quant	150.844	10.0349	2622.35	2781
jgi|Phlrad1|132044|minus.g3664.t1	S04_quant	95.6692	6.43355	2636.23	2781
jgi|Phlrad1|132044|minus.g3664.t1	S05_quant	109.405	7.24676	2618.35	2781
jgi|Phlrad1|132044|minus.g3664.t1	S06_quant	95.2152	6.33508	2621.63	2781
jgi|Phlrad1|132045|plus.g3702.t1	S01_quant	59.1395	7.62865	1377.61	1521
jgi|Phlrad1|132045|plus.g3702.t1	S02_quant	74.1712	9.52529	1369.44	1521
jgi|Phlrad1|132045|plus.g3702.t1	S03_quant	97.7887	12.522	1362.35	1521
jgi|Phlrad1|132045|plus.g3702.t1	S04_quant	84.3629	10.8673	1376.23	1521
jgi|Phlrad1|132045|plus.g3702.t1	S05_quant	76.5832	9.77819	1358.35	1521
jgi|Phlrad1|132045|plus.g3702.t1	S06_quant	62.4189	7.99603	1361.63	1521
jgi|Phlrad1|132046|minus.g3666.t1	S01_quant	185.576	13.7371	2400.61	2544
jgi|Phlrad1|132046|minus.g3666.t1	S02_quant	225.885	16.6048	2392.44	2544
jgi|Phlrad1|132046|minus.g3666.t1	S03_quant	216.384	15.8251	2385.35	2544
jgi|Phlrad1|132046|minus.g3666.t1	S04_quant	192.208	14.2024	2399.23	2544
jgi|Phlrad1|132046|minus.g3666.t1	S05_quant	249.807	18.1936	2381.35	2544
jgi|Phlrad1|132046|minus.g3666.t1	S06_quant	221.111	16.1736	2384.63	2544
jgi|Phlrad1|132047|plus.g3704.t1	S01_quant	19.3733	3.30518	1041.61	1185
jgi|Phlrad1|132047|plus.g3704.t1	S02_quant	20.2285	3.44243	1033.44	1185
jgi|Phlrad1|132047|plus.g3704.t1	S03_quant	11.4434	1.94505	1026.35	1185
jgi|Phlrad1|132047|plus.g3704.t1	S04_quant	15.655	2.66799	1040.23	1185
jgi|Phlrad1|132047|plus.g3704.t1	S05_quant	22.7926	3.86662	1022.35	1185
jgi|Phlrad1|132047|plus.g3704.t1	S06_quant	15.8692	2.69887	1025.63	1185
jgi|Phlrad1|132048|plus.g3705.t1	S01_quant	3.05894	3.78649	143.559	276
jgi|Phlrad1|132048|plus.g3705.t1	S02_quant	4.49523	5.75182	137.446	276
jgi|Phlrad1|132048|plus.g3705.t1	S03_quant	2.08061	2.68939	134.961	276
jgi|Phlrad1|132048|plus.g3705.t1	S04_quant	0.86972	1.0815	142.565	276
jgi|Phlrad1|132048|plus.g3705.t1	S05_quant	3.64682	4.93751	128.098	276
jgi|Phlrad1|132048|plus.g3705.t1	S06_quant	1.05795	1.3744	134.267	276
jgi|Phlrad1|132049|plus.g3706.t1	S01_quant	18.3536	2.96068	1101.61	1245
jgi|Phlrad1|132049|plus.g3706.t1	S02_quant	19.1047	3.07278	1093.44	1245
jgi|Phlrad1|132049|plus.g3706.t1	S03_quant	11.4434	1.83763	1086.35	1245
jgi|Phlrad1|132049|plus.g3706.t1	S04_quant	14.7852	2.38236	1100.23	1245
jgi|Phlrad1|132049|plus.g3706.t1	S05_quant	17.3224	2.77573	1082.35	1245
jgi|Phlrad1|132049|plus.g3706.t1	S06_quant	9.52152	1.52983	1085.63	1245
jgi|Phlrad1|132050|minus.g3669.t1	S01_quant	191.694	20.0191	1701.61	1845
jgi|Phlrad1|132050|minus.g3669.t1	S02_quant	186.552	19.3738	1693.44	1845
jgi|Phlrad1|132050|minus.g3669.t1	S03_quant	209.101	21.6313	1686.35	1845
jgi|Phlrad1|132050|minus.g3669.t1	S04_quant	188.729	19.6786	1700.23	1845
jgi|Phlrad1|132050|minus.g3669.t1	S05_quant	203.31	20.9594	1682.35	1845
jgi|Phlrad1|132050|minus.g3669.t1	S06_quant	205.242	21.2383	1685.63	1845
jgi|Phlrad1|132051|plus.g3708.t1	S01_quant	90.7486	13.3319	1209.61	1353
jgi|Phlrad1|132051|plus.g3708.t1	S02_quant	97.7712	14.3118	1201.44	1353
jgi|Phlrad1|132051|plus.g3708.t1	S03_quant	106.111	15.499	1194.35	1353
jgi|Phlrad1|132051|plus.g3708.t1	S04_quant	113.064	16.5896	1208.23	1353
jgi|Phlrad1|132051|plus.g3708.t1	S05_quant	120.345	17.5344	1190.35	1353
jgi|Phlrad1|132051|plus.g3708.t1	S06_quant	137.533	20.0981	1193.63	1353
jgi|Phlrad1|132052|minus.g3671.t1	S01_quant	3.05894	2.78497	195.185	333
jgi|Phlrad1|132052|minus.g3671.t1	S02_quant	1.12381	1.05271	187.745	333
jgi|Phlrad1|132052|minus.g3671.t1	S03_quant	3.12092	2.96845	183.411	333
jgi|Phlrad1|132052|minus.g3671.t1	S04_quant	2.60916	2.38708	193.773	333
jgi|Phlrad1|132052|minus.g3671.t1	S05_quant	2.73511	2.68151	176.902	333
jgi|Phlrad1|132052|minus.g3671.t1	S06_quant	4.23179	4.04253	182.594	333
jgi|Phlrad1|132053|minus.g3672.t1	S01_quant	2601.12	201.881	2289.61	2433
jgi|Phlrad1|132053|minus.g3672.t1	S02_quant	1289.01	99.3646	2281.44	2433
jgi|Phlrad1|132053|minus.g3672.t1	S03_quant	1011.18	77.5609	2274.35	2433
jgi|Phlrad1|132053|minus.g3672.t1	S04_quant	1990.79	154.237	2288.23	2433
jgi|Phlrad1|132053|minus.g3672.t1	S05_quant	2381.35	181.914	2270.35	2433
jgi|Phlrad1|132053|minus.g3672.t1	S06_quant	1251.55	96.0165	2273.63	2433
jgi|Phlrad1|132054|minus.g3673.t1	S01_quant	268.071	147.731	322.459	465
jgi|Phlrad1|132054|minus.g3673.t1	S02_quant	121.155	67.8543	314.016	465
jgi|Phlrad1|132054|minus.g3673.t1	S03_quant	96.659	54.7788	307.824	465
jgi|Phlrad1|132054|minus.g3673.t1	S04_quant	201.661	111.368	321.015	465
jgi|Phlrad1|132054|minus.g3673.t1	S05_quant	236.096	135.074	303.146	465
jgi|Phlrad1|132054|minus.g3673.t1	S06_quant	122.66	69.6573	307.151	465
jgi|Phlrad1|132055|plus.g3710.t1	S01_quant	33.7444	4.79104	1251.61	1395
jgi|Phlrad1|132055|plus.g3710.t1	S02_quant	32.8062	4.63999	1243.44	1395
jgi|Phlrad1|132055|plus.g3710.t1	S03_quant	36.5001	5.15022	1236.35	1395
jgi|Phlrad1|132055|plus.g3710.t1	S04_quant	35.7722	5.07245	1250.23	1395
jgi|Phlrad1|132055|plus.g3710.t1	S05_quant	39.2391	5.52232	1232.35	1395
jgi|Phlrad1|132055|plus.g3710.t1	S06_quant	30.7425	4.33979	1235.63	1395
jgi|Phlrad1|132056|plus.g3711.t1	S01_quant	47.9234	27.1573	313.586	456
jgi|Phlrad1|132056|plus.g3711.t1	S02_quant	2.24761	1.29515	305.201	456
jgi|Phlrad1|132056|plus.g3711.t1	S03_quant	10.4031	6.07011	298.976	456
jgi|Phlrad1|132056|plus.g3711.t1	S04_quant	18.2641	10.3763	312.046	456
jgi|Phlrad1|132056|plus.g3711.t1	S05_quant	30.0862	17.7268	294.356	456
jgi|Phlrad1|132056|plus.g3711.t1	S06_quant	8.46358	4.94844	298.333	456
jgi|Phlrad1|132057|minus.g3675.t1	S01_quant	32.6287	4.91539	1179.61	1323
jgi|Phlrad1|132057|minus.g3675.t1	S02_quant	28.0952	4.21791	1171.44	1323
jgi|Phlrad1|132057|minus.g3675.t1	S03_quant	35.3704	5.29944	1164.35	1323
jgi|Phlrad1|132057|minus.g3675.t1	S04_quant	30.4402	4.58015	1178.23	1323
jgi|Phlrad1|132057|minus.g3675.t1	S05_quant	20.9692	3.13422	1160.35	1323
jgi|Phlrad1|132057|minus.g3675.t1	S06_quant	16.9272	2.53739	1163.63	1323
jgi|Phlrad1|132058|plus.g3713.t1	S01_quant	37.7269	4.35449	1539.61	1683
jgi|Phlrad1|132058|plus.g3713.t1	S02_quant	38.2094	4.3879	1531.44	1683
jgi|Phlrad1|132058|plus.g3713.t1	S03_quant	46.8138	5.3575	1524.35	1683
jgi|Phlrad1|132058|plus.g3713.t1	S04_quant	56.5318	6.51529	1538.23	1683
jgi|Phlrad1|132058|plus.g3713.t1	S05_quant	32.8214	3.74412	1520.35	1683
jgi|Phlrad1|132058|plus.g3713.t1	S06_quant	37.0282	4.23906	1523.63	1683
jgi|Phlrad1|132059|plus.g3714.t1	S01_quant	43.8448	4.87995	1596.61	1740
jgi|Phlrad1|132059|plus.g3714.t1	S02_quant	42.7046	4.72814	1588.44	1740
jgi|Phlrad1|132059|plus.g3714.t1	S03_quant	52.0153	5.73821	1581.35	1740
jgi|Phlrad1|132059|plus.g3714.t1	S04_quant	40.0071	4.44607	1595.23	1740
jgi|Phlrad1|132059|plus.g3714.t1	S05_quant	39.2033	4.31054	1577.35	1740
jgi|Phlrad1|132059|plus.g3714.t1	S06_quant	32.7964	3.6192	1580.63	1740
jgi|Phlrad1|132060|minus.g3678.t1	S01_quant	31.6091	3.96513	1416.61	1560
jgi|Phlrad1|132060|minus.g3678.t1	S02_quant	21.3523	2.6662	1408.44	1560
jgi|Phlrad1|132060|minus.g3678.t1	S03_quant	24.9673	3.10813	1401.35	1560
jgi|Phlrad1|132060|minus.g3678.t1	S04_quant	26.0916	3.2684	1415.23	1560
jgi|Phlrad1|132060|minus.g3678.t1	S05_quant	27.3511	3.39474	1397.35	1560
jgi|Phlrad1|132060|minus.g3678.t1	S06_quant	19.043	2.37154	1400.63	1560
jgi|Phlrad1|132061|minus.g3679.t1	S01_quant	66.277	14.6925	801.609	945
jgi|Phlrad1|132061|minus.g3679.t1	S02_quant	77.5426	17.1875	793.44	945
jgi|Phlrad1|132061|minus.g3679.t1	S03_quant	78.0229	17.3093	786.348	945
jgi|Phlrad1|132061|minus.g3679.t1	S04_quant	63.4896	14.0653	800.227	945
jgi|Phlrad1|132061|minus.g3679.t1	S05_quant	61.9959	13.7436	782.348	945
jgi|Phlrad1|132061|minus.g3679.t1	S06_quant	71.9404	15.9725	785.627	945
jgi|Phlrad1|132062|minus.g3680.t1	S01_quant	88.7093	19.0937	825.609	969
jgi|Phlrad1|132062|minus.g3680.t1	S02_quant	66.3046	14.2651	817.44	969
jgi|Phlrad1|132062|minus.g3680.t1	S03_quant	67.6199	14.5571	810.348	969
jgi|Phlrad1|132062|minus.g3680.t1	S04_quant	80.0143	17.21	824.227	969
jgi|Phlrad1|132062|minus.g3680.t1	S05_quant	74.7598	16.0798	806.348	969
jgi|Phlrad1|132062|minus.g3680.t1	S06_quant	70.8825	15.2711	809.627	969
jgi|Phlrad1|132063|minus.g3681.t1	S01_quant	57.1002	12.5641	807.609	951
jgi|Phlrad1|132063|minus.g3681.t1	S02_quant	66.3046	14.5862	799.44	951
jgi|Phlrad1|132063|minus.g3681.t1	S03_quant	56.1765	12.3683	792.348	951
jgi|Phlrad1|132063|minus.g3681.t1	S04_quant	72.1868	15.8731	806.227	951
jgi|Phlrad1|132063|minus.g3681.t1	S05_quant	76.5832	16.8481	788.348	951
jgi|Phlrad1|132063|minus.g3681.t1	S06_quant	59.245	13.0541	791.627	951
jgi|Phlrad1|132064|minus.g3682.t1	S01_quant	56.0806	12.2488	813.609	957
jgi|Phlrad1|132064|minus.g3682.t1	S02_quant	48.3237	10.5515	805.44	957
jgi|Phlrad1|132064|minus.g3682.t1	S03_quant	69.7005	15.2306	798.348	957
jgi|Phlrad1|132064|minus.g3682.t1	S04_quant	55.6621	12.1491	812.227	957
jgi|Phlrad1|132064|minus.g3682.t1	S05_quant	71.1129	15.5265	794.348	957
jgi|Phlrad1|132064|minus.g3682.t1	S06_quant	81.4619	17.8144	797.627	957
jgi|Phlrad1|132065|plus.g3720.t1	S01_quant	74.4342	23.8067	555.609	699
jgi|Phlrad1|132065|plus.g3720.t1	S02_quant	70.7998	22.7448	547.44	699
jgi|Phlrad1|132065|plus.g3720.t1	S03_quant	74.902	24.1771	540.458	699
jgi|Phlrad1|132065|plus.g3720.t1	S04_quant	77.4051	24.7596	554.227	699
jgi|Phlrad1|132065|plus.g3720.t1	S05_quant	80.23	25.9434	536.348	699
jgi|Phlrad1|132065|plus.g3720.t1	S06_quant	80.404	25.9896	539.627	699
jgi|Phlrad1|132066|plus.g3721.t1	S01_quant	268.167	19.5096	2442.61	2586
jgi|Phlrad1|132066|plus.g3721.t1	S02_quant	296.685	21.433	2434.44	2586
jgi|Phlrad1|132066|plus.g3721.t1	S03_quant	269.439	19.3643	2427.35	2586
jgi|Phlrad1|132066|plus.g3721.t1	S04_quant	635.766	46.1689	2441.23	2586
jgi|Phlrad1|132066|plus.g3721.t1	S05_quant	586.226	41.9552	2423.35	2586
jgi|Phlrad1|132066|plus.g3721.t1	S06_quant	976.485	70.1906	2426.63	2586
jgi|Phlrad1|132067|plus.g3722.t1	S01_quant	74.8085	9.07665	1464.61	1608
jgi|Phlrad1|132067|plus.g3722.t1	S02_quant	74.2604	8.96707	1456.44	1608
jgi|Phlrad1|132067|plus.g3722.t1	S03_quant	62.9653	7.57882	1449.35	1608
jgi|Phlrad1|132067|plus.g3722.t1	S04_quant	63.2314	7.66094	1463.23	1608
jgi|Phlrad1|132067|plus.g3722.t1	S05_quant	60.8563	7.30246	1445.35	1608
jgi|Phlrad1|132067|plus.g3722.t1	S06_quant	51.322	6.17965	1448.63	1608
jgi|Phlrad1|132068|minus.g3685.t1	S01_quant	237.578	71.7257	588.609	732
jgi|Phlrad1|132068|minus.g3685.t1	S02_quant	204.533	61.9714	580.44	732
jgi|Phlrad1|132068|minus.g3685.t1	S03_quant	159.167	48.4292	573.348	732
jgi|Phlrad1|132068|minus.g3685.t1	S04_quant	245.261	74.0429	587.227	732
jgi|Phlrad1|132068|minus.g3685.t1	S05_quant	333.684	101.647	569.348	732
jgi|Phlrad1|132068|minus.g3685.t1	S06_quant	354.412	107.958	572.627	732
jgi|Phlrad1|132069|plus.g3724.t1	S01_quant	38.7466	2.80167	2457.61	2601
jgi|Phlrad1|132069|plus.g3724.t1	S02_quant	35.9618	2.58203	2449.44	2601
jgi|Phlrad1|132069|plus.g3724.t1	S03_quant	56.1765	4.01254	2442.35	2601
jgi|Phlrad1|132069|plus.g3724.t1	S04_quant	41.7466	3.0131	2456.23	2601
jgi|Phlrad1|132069|plus.g3724.t1	S05_quant	44.6735	3.17754	2438.35	2601
jgi|Phlrad1|132069|plus.g3724.t1	S06_quant	40.202	2.872	2441.63	2601
jgi|Phlrad1|132070|minus.g3687.t1	S01_quant	84.6307	20.6127	729.609	873
jgi|Phlrad1|132070|minus.g3687.t1	S02_quant	100.019	24.3819	721.44	873
jgi|Phlrad1|132070|minus.g3687.t1	S03_quant	80.1035	19.5621	714.348	873
jgi|Phlrad1|132070|minus.g3687.t1	S04_quant	78.2748	19.0553	728.227	873
jgi|Phlrad1|132070|minus.g3687.t1	S05_quant	97.5524	23.8179	710.348	873
jgi|Phlrad1|132070|minus.g3687.t1	S06_quant	116.374	28.4447	713.627	873
jgi|Phlrad1|132071|minus.g3688.t1	S01_quant	475.801	64.3168	1314.61	1458
jgi|Phlrad1|132071|minus.g3688.t1	S02_quant	486.519	65.4932	1306.44	1458
jgi|Phlrad1|132071|minus.g3688.t1	S03_quant	453.026	60.8234	1299.35	1458
jgi|Phlrad1|132071|minus.g3688.t1	S04_quant	402.939	54.3952	1313.23	1458
jgi|Phlrad1|132071|minus.g3688.t1	S05_quant	443.316	59.3558	1295.35	1458
jgi|Phlrad1|132071|minus.g3688.t1	S06_quant	445.913	59.8939	1298.63	1458
jgi|Phlrad1|132072|plus.g3727.t1	S01_quant	16.3144	7.96437	364.011	507
jgi|Phlrad1|132072|plus.g3727.t1	S02_quant	30.3428	15.0045	355.647	507
jgi|Phlrad1|132072|plus.g3727.t1	S03_quant	24.9673	12.4717	349.237	507
jgi|Phlrad1|132072|plus.g3727.t1	S04_quant	26.0916	12.7553	362.636	507
jgi|Phlrad1|132072|plus.g3727.t1	S05_quant	30.9979	15.5981	344.665	507
jgi|Phlrad1|132072|plus.g3727.t1	S06_quant	31.7384	15.8926	348.343	507
jgi|Phlrad1|132073|plus.g3728.t1	S01_quant	23.4519	9.69855	429.701	573
jgi|Phlrad1|132073|plus.g3728.t1	S02_quant	22.4761	9.37818	421.491	573
jgi|Phlrad1|132073|plus.g3728.t1	S03_quant	13.524	5.69059	414.591	573
jgi|Phlrad1|132073|plus.g3728.t1	S04_quant	17.3944	7.19877	428.364	573
jgi|Phlrad1|132073|plus.g3728.t1	S05_quant	11.8522	5.00775	410.479	573
jgi|Phlrad1|132073|plus.g3728.t1	S06_quant	23.2748	9.80986	413.847	573
jgi|Phlrad1|132074|minus.g3691.t1	S01_quant	161.104	22.4961	1272.61	1416
jgi|Phlrad1|132074|minus.g3691.t1	S02_quant	161.828	22.5082	1264.44	1416
jgi|Phlrad1|132074|minus.g3691.t1	S03_quant	175.812	24.393	1257.35	1416
jgi|Phlrad1|132074|minus.g3691.t1	S04_quant	233.955	32.6264	1271.23	1416
jgi|Phlrad1|132074|minus.g3691.t1	S05_quant	252.542	34.9461	1253.35	1416
jgi|Phlrad1|132074|minus.g3691.t1	S06_quant	214.763	29.8106	1256.63	1416
jgi|Phlrad1|132075|minus.g3692.t1	S01_quant	114.2	11.2331	1806.61	1950
jgi|Phlrad1|132075|minus.g3692.t1	S02_quant	120.247	11.7589	1798.44	1950
jgi|Phlrad1|132075|minus.g3692.t1	S03_quant	116.514	11.3468	1791.35	1950
jgi|Phlrad1|132075|minus.g3692.t1	S04_quant	112.194	11.0179	1805.23	1950
jgi|Phlrad1|132075|minus.g3692.t1	S05_quant	116.698	11.3238	1787.35	1950
jgi|Phlrad1|132075|minus.g3692.t1	S06_quant	157.634	15.3554	1790.63	1950
jgi|Phlrad1|132076|plus.g3731.t1	S01_quant	65.2574	22.5784	513.609	657
jgi|Phlrad1|132076|plus.g3731.t1	S02_quant	68.5522	23.8503	505.491	657
jgi|Phlrad1|132076|plus.g3731.t1	S03_quant	88.426	30.9474	498.458	657
jgi|Phlrad1|132076|plus.g3731.t1	S04_quant	72.1868	24.9837	512.227	657
jgi|Phlrad1|132076|plus.g3731.t1	S05_quant	77.4949	27.1879	494.348	657
jgi|Phlrad1|132076|plus.g3731.t1	S06_quant	92.0414	32.2623	497.627	657
jgi|Phlrad1|132077|minus.g3694.t1	S01_quant	95.8468	9.33477	1824.61	1968
jgi|Phlrad1|132077|minus.g3694.t1	S02_quant	69.676	6.74603	1816.44	1968
jgi|Phlrad1|132077|minus.g3694.t1	S03_quant	78.0229	7.52268	1809.35	1968
jgi|Phlrad1|132077|minus.g3694.t1	S04_quant	83.4931	8.11841	1823.23	1968
jgi|Phlrad1|132077|minus.g3694.t1	S05_quant	73.8481	7.09438	1805.35	1968
jgi|Phlrad1|132077|minus.g3694.t1	S06_quant	76.1722	7.34622	1808.63	1968
jgi|Phlrad1|132078|plus.g3733.t1	S01_quant	85.6503	32.4767	468.655	612
jgi|Phlrad1|132078|plus.g3733.t1	S02_quant	105.638	40.3444	460.491	612
jgi|Phlrad1|132078|plus.g3733.t1	S03_quant	112.353	43.219	453.505	612
jgi|Phlrad1|132078|plus.g3733.t1	S04_quant	66.9685	25.4099	467.227	612
jgi|Phlrad1|132078|plus.g3733.t1	S05_quant	83.8768	32.3739	449.348	612
jgi|Phlrad1|132078|plus.g3733.t1	S06_quant	100.505	38.7236	452.719	612
jgi|Phlrad1|132079|plus.g3734.t1	S01_quant	308.953	46.6612	1176.61	1320
jgi|Phlrad1|132079|plus.g3734.t1	S02_quant	370.856	55.8194	1168.44	1320
jgi|Phlrad1|132079|plus.g3734.t1	S03_quant	392.195	58.9132	1161.35	1320
jgi|Phlrad1|132079|plus.g3734.t1	S04_quant	287.877	43.4257	1175.23	1320
jgi|Phlrad1|132079|plus.g3734.t1	S05_quant	269.864	40.4406	1157.35	1320
jgi|Phlrad1|132079|plus.g3734.t1	S06_quant	321.616	48.335	1160.63	1320
jgi|Phlrad1|132080|plus.g3735.t1	S01_quant	65.2574	9.51615	1218.61	1362
jgi|Phlrad1|132080|plus.g3735.t1	S02_quant	82.0379	11.9195	1210.44	1362
jgi|Phlrad1|132080|plus.g3735.t1	S03_quant	101.95	14.7798	1203.35	1362
jgi|Phlrad1|132080|plus.g3735.t1	S04_quant	56.5318	8.23346	1217.23	1362
jgi|Phlrad1|132080|plus.g3735.t1	S05_quant	50.1437	7.25116	1199.35	1362
jgi|Phlrad1|132080|plus.g3735.t1	S06_quant	68.7666	9.97385	1202.63	1362
jgi|Phlrad1|132081|plus.g3736.t1	S01_quant	58.1199	8.89121	1161.61	1305
jgi|Phlrad1|132081|plus.g3736.t1	S02_quant	43.8285	6.68262	1153.44	1305
jgi|Phlrad1|132081|plus.g3736.t1	S03_quant	53.0556	8.07398	1146.35	1305
jgi|Phlrad1|132081|plus.g3736.t1	S04_quant	45.2255	6.91037	1160.23	1305
jgi|Phlrad1|132081|plus.g3736.t1	S05_quant	61.9959	9.41241	1142.35	1305
jgi|Phlrad1|132081|plus.g3736.t1	S06_quant	59.245	9.02039	1145.63	1305
jgi|Phlrad1|132082|plus.g3737.t1	S01_quant	302.835	28.6461	1878.61	2022
jgi|Phlrad1|132082|plus.g3737.t1	S02_quant	276.456	25.9937	1870.44	2022
jgi|Phlrad1|132082|plus.g3737.t1	S03_quant	275.681	25.8099	1863.35	2022
jgi|Phlrad1|132082|plus.g3737.t1	S04_quant	300.923	28.4184	1877.23	2022
jgi|Phlrad1|132082|plus.g3737.t1	S05_quant	251.63	23.4714	1859.35	2022
jgi|Phlrad1|132082|plus.g3737.t1	S06_quant	239.096	22.3905	1862.63	2022
jgi|Phlrad1|132083|minus.g3698.t1	S01_quant	451.704	59.5642	1347.61	1491
jgi|Phlrad1|132083|minus.g3698.t1	S02_quant	692.178	90.8826	1339.44	1491
jgi|Phlrad1|132083|minus.g3698.t1	S03_quant	604.418	79.1393	1332.35	1491
jgi|Phlrad1|132083|minus.g3698.t1	S04_quant	343.54	45.2397	1346.23	1491
jgi|Phlrad1|132083|minus.g3698.t1	S05_quant	403.885	52.733	1328.35	1491
jgi|Phlrad1|132083|minus.g3698.t1	S06_quant	557.538	73.0312	1331.63	1491
jgi|Phlrad1|132084|minus.g3699.t1	S01_quant	61.1788	7.53091	1443.61	1587
jgi|Phlrad1|132084|minus.g3699.t1	S02_quant	61.8959	7.58338	1435.44	1587
jgi|Phlrad1|132084|minus.g3699.t1	S03_quant	54.0959	6.60698	1428.35	1587
jgi|Phlrad1|132084|minus.g3699.t1	S04_quant	39.1374	4.81082	1442.23	1587
jgi|Phlrad1|132084|minus.g3699.t1	S05_quant	72.9363	8.88105	1424.35	1587
jgi|Phlrad1|132084|minus.g3699.t1	S06_quant	66.6507	8.14341	1427.63	1587
jgi|Phlrad1|132085|minus.g3700.t1	S01_quant	341.582	25.9668	2337.61	2481
jgi|Phlrad1|132085|minus.g3700.t1	S02_quant	265.218	20.0234	2329.44	2481
jgi|Phlrad1|132085|minus.g3700.t1	S03_quant	256.956	19.302	2322.35	2481
jgi|Phlrad1|132085|minus.g3700.t1	S04_quant	256.567	19.4692	2336.23	2481
jgi|Phlrad1|132085|minus.g3700.t1	S05_quant	262.571	19.6428	2318.35	2481
jgi|Phlrad1|132085|minus.g3700.t1	S06_quant	238.038	17.8842	2321.63	2481
jgi|Phlrad1|132086|minus.g3701.t1	S01_quant	77.4932	11.109	1239.61	1383
jgi|Phlrad1|132086|minus.g3701.t1	S02_quant	70.7998	10.1112	1231.44	1383
jgi|Phlrad1|132086|minus.g3701.t1	S03_quant	58.2571	8.30074	1224.35	1383
jgi|Phlrad1|132086|minus.g3701.t1	S04_quant	66.0987	9.46355	1238.23	1383
jgi|Phlrad1|132086|minus.g3701.t1	S05_quant	51.9671	7.38553	1220.35	1383
jgi|Phlrad1|132086|minus.g3701.t1	S06_quant	42.3179	6.03242	1223.63	1383
jgi|Phlrad1|132087|plus.g3741.t1	S01_quant	1097.14	34.5463	5643.61	5787
jgi|Phlrad1|132087|plus.g3741.t1	S02_quant	870.95	27.1801	5635.44	5787
jgi|Phlrad1|132087|plus.g3741.t1	S03_quant	856.172	26.537	5628.35	5787
jgi|Phlrad1|132087|plus.g3741.t1	S04_quant	963.65	30.2782	5642.23	5787
jgi|Phlrad1|132087|plus.g3741.t1	S05_quant	1096.78	33.8208	5624.35	5787
jgi|Phlrad1|132087|plus.g3741.t1	S06_quant	860.111	26.6591	5627.63	5787
jgi|Phlrad1|132088|plus.g3742.t1	S01_quant	50.9867	8.43145	1074.61	1218
jgi|Phlrad1|132088|plus.g3742.t1	S02_quant	62.3392	10.2804	1066.44	1218
jgi|Phlrad1|132088|plus.g3742.t1	S03_quant	55.6919	9.1712	1059.35	1218
jgi|Phlrad1|132088|plus.g3742.t1	S04_quant	62.4785	10.3205	1073.23	1218
jgi|Phlrad1|132088|plus.g3742.t1	S05_quant	54.9498	9.03039	1055.35	1218
jgi|Phlrad1|132088|plus.g3742.t1	S06_quant	45.6267	7.51783	1058.63	1218
jgi|Phlrad1|132089|plus.g3742.t2	S01_quant	151.923	25.4785	1059.61	1203
jgi|Phlrad1|132089|plus.g3742.t2	S02_quant	174.784	29.235	1051.44	1203
jgi|Phlrad1|132089|plus.g3742.t2	S03_quant	202.304	33.7934	1044.35	1203
jgi|Phlrad1|132089|plus.g3742.t2	S04_quant	100.159	16.7793	1058.23	1203
jgi|Phlrad1|132089|plus.g3742.t2	S05_quant	114.627	19.1093	1040.35	1203
jgi|Phlrad1|132089|plus.g3742.t2	S06_quant	102.486	17.1291	1043.63	1203
jgi|Phlrad1|132090|minus.g3704.t1	S01_quant	48.9431	37.998	228.889	369
jgi|Phlrad1|132090|minus.g3704.t1	S02_quant	32.5904	25.9495	220.875	369
jgi|Phlrad1|132090|minus.g3704.t1	S03_quant	56.1765	45.3399	216.146	369
jgi|Phlrad1|132090|minus.g3704.t1	S04_quant	40.8769	31.8539	227.497	369
jgi|Phlrad1|132090|minus.g3704.t1	S05_quant	42.8501	35.3084	210.48	369
jgi|Phlrad1|132090|minus.g3704.t1	S06_quant	45.4917	36.8542	215.309	369
jgi|Phlrad1|132091|plus.g3743.t1	S01_quant	302.835	31.8505	1689.61	1833
jgi|Phlrad1|132091|plus.g3743.t1	S02_quant	275.333	28.798	1681.44	1833
jgi|Phlrad1|132091|plus.g3743.t1	S03_quant	317.293	33.0589	1674.35	1833
jgi|Phlrad1|132091|plus.g3743.t1	S04_quant	274.832	28.86	1688.23	1833
jgi|Phlrad1|132091|plus.g3743.t1	S05_quant	276.246	28.6831	1670.35	1833
jgi|Phlrad1|132091|plus.g3743.t1	S06_quant	246.502	25.6908	1673.63	1833
jgi|Phlrad1|132092|minus.g3706.t1	S01_quant	50.9823	7.47128	1212.61	1356
jgi|Phlrad1|132092|minus.g3706.t1	S02_quant	46.0761	6.72785	1204.44	1356
jgi|Phlrad1|132092|minus.g3706.t1	S03_quant	44.7331	6.51751	1197.35	1356
jgi|Phlrad1|132092|minus.g3706.t1	S04_quant	63.4896	9.29262	1211.23	1356
jgi|Phlrad1|132092|minus.g3706.t1	S05_quant	52.8789	7.68513	1193.35	1356
jgi|Phlrad1|132092|minus.g3706.t1	S06_quant	50.7815	7.40224	1196.63	1356
jgi|Phlrad1|132093|plus.g3745.t1	S01_quant	191.694	24.89	1368.61	1512
jgi|Phlrad1|132093|plus.g3745.t1	S02_quant	197.79	25.5688	1360.44	1512
jgi|Phlrad1|132093|plus.g3745.t1	S03_quant	142.522	18.3715	1353.35	1512
jgi|Phlrad1|132093|plus.g3745.t1	S04_quant	201.775	26.163	1367.23	1512
jgi|Phlrad1|132093|plus.g3745.t1	S05_quant	184.164	23.6711	1349.35	1512
jgi|Phlrad1|132093|plus.g3745.t1	S06_quant	186.199	24.0113	1352.63	1512
jgi|Phlrad1|132094|minus.g3708.t1	S01_quant	749.44	42.677	3120.61	3264
jgi|Phlrad1|132094|minus.g3708.t1	S02_quant	743.96	42.0373	3112.44	3264
jgi|Phlrad1|132094|minus.g3708.t1	S03_quant	621.063	34.8897	3105.35	3264
jgi|Phlrad1|132094|minus.g3708.t1	S04_quant	740.132	42.0652	3119.23	3264
jgi|Phlrad1|132094|minus.g3708.t1	S05_quant	769.478	43.0311	3101.35	3264
jgi|Phlrad1|132094|minus.g3708.t1	S06_quant	751.143	42.2017	3104.63	3264
jgi|Phlrad1|132095|plus.g3747.t1	S01_quant	64.2378	14.3478	795.609	939
jgi|Phlrad1|132095|plus.g3747.t1	S02_quant	60.6856	13.5536	787.44	939
jgi|Phlrad1|132095|plus.g3747.t1	S03_quant	75.9423	16.9773	780.348	939
jgi|Phlrad1|132095|plus.g3747.t1	S04_quant	64.3593	14.3657	794.227	939
jgi|Phlrad1|132095|plus.g3747.t1	S05_quant	65.6427	14.6645	776.348	939
jgi|Phlrad1|132095|plus.g3747.t1	S06_quant	61.3609	13.7285	779.627	939
jgi|Phlrad1|132096|minus.g3710.t1	S01_quant	257.971	49.7416	921.609	1065
jgi|Phlrad1|132096|minus.g3710.t1	S02_quant	227.009	43.7068	913.44	1065
jgi|Phlrad1|132096|minus.g3710.t1	S03_quant	225.746	43.4509	906.348	1065
jgi|Phlrad1|132096|minus.g3710.t1	S04_quant	247.87	47.7519	920.227	1065
jgi|Phlrad1|132096|minus.g3710.t1	S05_quant	220.632	42.4064	902.348	1065
jgi|Phlrad1|132096|minus.g3710.t1	S06_quant	294.109	56.6469	905.627	1065
jgi|Phlrad1|132097|plus.g3749.t1	S01_quant	93.8075	46.1618	361.12	504
jgi|Phlrad1|132097|plus.g3749.t1	S02_quant	101.143	50.4405	352.647	504
jgi|Phlrad1|132097|plus.g3749.t1	S03_quant	95.7081	48.2175	346.271	504
jgi|Phlrad1|132097|plus.g3749.t1	S04_quant	98.2784	48.4458	359.636	504
jgi|Phlrad1|132097|plus.g3749.t1	S05_quant	90.2587	45.8122	341.699	504
jgi|Phlrad1|132097|plus.g3749.t1	S06_quant	103.679	52.3668	345.343	504
jgi|Phlrad1|132098|minus.g3711.t2	S01_quant	533.376	27.3495	3465.61	3609
jgi|Phlrad1|132098|minus.g3711.t2	S02_quant	509.199	25.9011	3457.44	3609
jgi|Phlrad1|132098|minus.g3711.t2	S03_quant	621.422	31.4193	3450.35	3609
jgi|Phlrad1|132098|minus.g3711.t2	S04_quant	502.637	25.7223	3464.23	3609
jgi|Phlrad1|132098|minus.g3711.t2	S05_quant	551.293	27.7434	3446.35	3609
jgi|Phlrad1|132098|minus.g3711.t2	S06_quant	474.596	23.9976	3449.63	3609
jgi|Phlrad1|132099|minus.g3711.t1	S01_quant	49.8618	2.57007	3447.61	3591
jgi|Phlrad1|132099|minus.g3711.t1	S02_quant	51.5805	2.63745	3439.44	3591
jgi|Phlrad1|132099|minus.g3711.t1	S03_quant	62.0586	3.15416	3432.35	3591
jgi|Phlrad1|132099|minus.g3711.t1	S04_quant	35.7198	1.8375	3446.23	3591
jgi|Phlrad1|132099|minus.g3711.t1	S05_quant	27.6393	1.39823	3428.35	3591
jgi|Phlrad1|132099|minus.g3711.t1	S06_quant	48.0303	2.44136	3431.63	3591
jgi|Phlrad1|132100|plus.g3751.t1	S01_quant	182.517	27.636	1173.61	1317
jgi|Phlrad1|132100|plus.g3751.t1	S02_quant	173.066	26.1161	1165.44	1317
jgi|Phlrad1|132100|plus.g3751.t1	S03_quant	168.53	25.3811	1158.35	1317
jgi|Phlrad1|132100|plus.g3751.t1	S04_quant	169.595	25.6486	1172.23	1317
jgi|Phlrad1|132100|plus.g3751.t1	S05_quant	154.99	23.2864	1154.35	1317
jgi|Phlrad1|132100|plus.g3751.t1	S06_quant	150.229	22.636	1157.63	1317
jgi|Phlrad1|132101|minus.g3713.t1	S01_quant	675.006	88.0304	1362.61	1506
jgi|Phlrad1|132101|minus.g3713.t1	S02_quant	587.751	76.3167	1354.44	1506
jgi|Phlrad1|132101|minus.g3713.t1	S03_quant	796.874	103.177	1347.35	1506
jgi|Phlrad1|132101|minus.g3713.t1	S04_quant	660.987	86.0842	1361.23	1506
jgi|Phlrad1|132101|minus.g3713.t1	S05_quant	563.433	72.7428	1343.35	1506
jgi|Phlrad1|132101|minus.g3713.t1	S06_quant	633.71	82.0843	1346.63	1506
jgi|Phlrad1|132102|plus.g3754.t1	S01_quant	1.01965	1.93861	93.4663	213
jgi|Phlrad1|132102|plus.g3754.t1	S02_quant	0	0	89.3839	213
jgi|Phlrad1|132102|plus.g3754.t1	S03_quant	2.08061	4.10238	88.4765	213
jgi|Phlrad1|132102|plus.g3754.t1	S04_quant	0	0	91.9548	213
jgi|Phlrad1|132102|plus.g3754.t1	S05_quant	1.82341	3.88609	81.3781	213
jgi|Phlrad1|132102|plus.g3754.t1	S06_quant	1.05795	2.094	88.1258	213
jgi|Phlrad1|132103|plus.g3755.t1	S01_quant	74.4342	20.6802	639.609	783
jgi|Phlrad1|132103|plus.g3755.t1	S02_quant	111.257	30.9871	631.44	783
jgi|Phlrad1|132103|plus.g3755.t1	S03_quant	114.434	31.9742	624.348	783
jgi|Phlrad1|132103|plus.g3755.t1	S04_quant	90.4509	25.1246	638.227	783
jgi|Phlrad1|132103|plus.g3755.t1	S05_quant	94.8173	26.5087	620.348	783
jgi|Phlrad1|132103|plus.g3755.t1	S06_quant	95.2152	26.6316	623.627	783
jgi|Phlrad1|132104|plus.g3756.t1	S01_quant	584.258	65.7697	1578.61	1722
jgi|Phlrad1|132104|plus.g3756.t1	S02_quant	718.112	80.4187	1570.44	1722
jgi|Phlrad1|132104|plus.g3756.t1	S03_quant	545.12	60.8288	1563.35	1722
jgi|Phlrad1|132104|plus.g3756.t1	S04_quant	547.924	61.5867	1577.23	1722
jgi|Phlrad1|132104|plus.g3756.t1	S05_quant	572.55	63.6806	1559.35	1722
jgi|Phlrad1|132104|plus.g3756.t1	S06_quant	608.32	67.9036	1562.63	1722
jgi|Phlrad1|132105|plus.g3757.t1	S01_quant	26.5108	3.36118	1401.61	1545
jgi|Phlrad1|132105|plus.g3757.t1	S02_quant	46.0761	5.81531	1393.44	1545
jgi|Phlrad1|132105|plus.g3757.t1	S03_quant	34.3301	4.31992	1386.35	1545
jgi|Phlrad1|132105|plus.g3757.t1	S04_quant	43.486	5.5057	1400.23	1545
jgi|Phlrad1|132105|plus.g3757.t1	S05_quant	51.0554	6.40562	1382.35	1545
jgi|Phlrad1|132105|plus.g3757.t1	S06_quant	45.4917	5.72668	1385.63	1545
jgi|Phlrad1|132106|plus.g3758.t1	S01_quant	102.984	13.1982	1386.61	1530
jgi|Phlrad1|132106|plus.g3758.t1	S02_quant	123.619	15.7718	1378.44	1530
jgi|Phlrad1|132106|plus.g3758.t1	S03_quant	89.4663	11.3811	1371.35	1530
jgi|Phlrad1|132106|plus.g3758.t1	S04_quant	101.757	13.0228	1385.23	1530
jgi|Phlrad1|132106|plus.g3758.t1	S05_quant	86.6119	10.9859	1367.35	1530
jgi|Phlrad1|132106|plus.g3758.t1	S06_quant	113.2	14.4061	1370.63	1530
jgi|Phlrad1|132107|plus.g3759.t1	S01_quant	89.7289	12.1292	1314.61	1458
jgi|Phlrad1|132107|plus.g3759.t1	S02_quant	107.885	14.5231	1306.44	1458
jgi|Phlrad1|132107|plus.g3759.t1	S03_quant	118.595	15.9226	1299.35	1458
jgi|Phlrad1|132107|plus.g3759.t1	S04_quant	100.018	13.502	1313.23	1458
jgi|Phlrad1|132107|plus.g3759.t1	S05_quant	89.347	11.9627	1295.35	1458
jgi|Phlrad1|132107|plus.g3759.t1	S06_quant	117.432	15.7732	1298.63	1458
jgi|Phlrad1|132108|plus.g3760.t1	S01_quant	234.519	31.2029	1335.61	1479
jgi|Phlrad1|132108|plus.g3760.t1	S02_quant	271.961	36.0311	1327.44	1479
jgi|Phlrad1|132108|plus.g3760.t1	S03_quant	259.036	34.2251	1320.35	1479
jgi|Phlrad1|132108|plus.g3760.t1	S04_quant	249.61	33.166	1334.23	1479
jgi|Phlrad1|132108|plus.g3760.t1	S05_quant	212.427	27.9882	1316.35	1479
jgi|Phlrad1|132108|plus.g3760.t1	S06_quant	297.283	39.2948	1319.63	1479
jgi|Phlrad1|132109|minus.g3720.t1	S01_quant	31.6091	6.13476	915.609	1059
jgi|Phlrad1|132109|minus.g3720.t1	S02_quant	42.7046	8.27643	907.44	1059
jgi|Phlrad1|132109|minus.g3720.t1	S03_quant	37.451	7.25648	900.348	1059
jgi|Phlrad1|132109|minus.g3720.t1	S04_quant	33.9191	6.57735	914.227	1059
jgi|Phlrad1|132109|minus.g3720.t1	S05_quant	34.6448	6.70343	896.348	1059
jgi|Phlrad1|132109|minus.g3720.t1	S06_quant	39.144	7.58961	899.627	1059
jgi|Phlrad1|132110|minus.g3721.t1	S01_quant	9.952	10.9201	161.95	297
jgi|Phlrad1|132110|minus.g3721.t1	S02_quant	7.57846	8.57152	155.492	297
jgi|Phlrad1|132110|minus.g3721.t1	S03_quant	2.16466	2.47986	152.277	297
jgi|Phlrad1|132110|minus.g3721.t1	S04_quant	4.1955	4.62216	160.916	297
jgi|Phlrad1|132110|minus.g3721.t1	S05_quant	6.38418	7.60751	145.546	297
jgi|Phlrad1|132110|minus.g3721.t1	S06_quant	8.98713	10.3328	151.712	297
jgi|Phlrad1|132111|minus.g3721.t2	S01_quant	2.28376	4.24605	95.5787	216
jgi|Phlrad1|132111|minus.g3721.t2	S02_quant	3.6596	7.04962	91.2965	216
jgi|Phlrad1|132111|minus.g3721.t2	S03_quant	8.2384	15.876	90.5261	216
jgi|Phlrad1|132111|minus.g3721.t2	S04_quant	5.37142	10.1087	94.2009	216
jgi|Phlrad1|132111|minus.g3721.t2	S05_quant	1.82116	3.78968	83.3452	216
jgi|Phlrad1|132111|minus.g3721.t2	S06_quant	6.88208	13.3197	90.1243	216
jgi|Phlrad1|132112|minus.g3722.t1	S01_quant	12.3027	2.98417	732.609	876
jgi|Phlrad1|132112|minus.g3722.t1	S02_quant	16.9643	4.11831	724.44	876
jgi|Phlrad1|132112|minus.g3722.t1	S03_quant	8.35579	2.03203	717.348	876
jgi|Phlrad1|132112|minus.g3722.t1	S04_quant	18.3904	4.45861	731.227	876
jgi|Phlrad1|132112|minus.g3722.t1	S05_quant	21.9598	5.33905	713.348	876
jgi|Phlrad1|132112|minus.g3722.t1	S06_quant	18.0179	4.38558	716.627	876
jgi|Phlrad1|132113|minus.g3723.t1	S01_quant	545.444	133.397	726.609	870
jgi|Phlrad1|132113|minus.g3723.t1	S02_quant	512.349	125.418	718.44	870
jgi|Phlrad1|132113|minus.g3723.t1	S03_quant	508.676	124.748	711.348	870
jgi|Phlrad1|132113|minus.g3723.t1	S04_quant	484.308	118.388	725.227	870
jgi|Phlrad1|132113|minus.g3723.t1	S05_quant	481.301	118.01	707.348	870
jgi|Phlrad1|132113|minus.g3723.t1	S06_quant	558.563	137.103	710.627	870
jgi|Phlrad1|132114|plus.g3764.t1	S01_quant	19.3733	10.3875	331.427	474
jgi|Phlrad1|132114|plus.g3764.t1	S02_quant	15.7333	8.56863	322.919	474
jgi|Phlrad1|132114|plus.g3764.t1	S03_quant	20.8061	11.4609	316.699	474
jgi|Phlrad1|132114|plus.g3764.t1	S04_quant	23.4824	12.617	329.949	474
jgi|Phlrad1|132114|plus.g3764.t1	S05_quant	20.0575	11.1498	311.993	474
jgi|Phlrad1|132114|plus.g3764.t1	S06_quant	15.8692	8.76149	315.932	474
jgi|Phlrad1|132115|plus.g3765.t1	S01_quant	48.9431	8.16186	1065.61	1209
jgi|Phlrad1|132115|plus.g3765.t1	S02_quant	38.2094	6.35478	1057.44	1209
jgi|Phlrad1|132115|plus.g3765.t1	S03_quant	41.6122	6.91131	1050.35	1209
jgi|Phlrad1|132115|plus.g3765.t1	S04_quant	46.0952	7.6786	1064.23	1209
jgi|Phlrad1|132115|plus.g3765.t1	S05_quant	33.7331	5.59134	1046.35	1209
jgi|Phlrad1|132115|plus.g3765.t1	S06_quant	48.6656	8.0873	1049.63	1209
jgi|Phlrad1|132116|minus.g3725.t1	S01_quant	1578.41	91.5553	3063.61	3207
jgi|Phlrad1|132116|minus.g3725.t1	S02_quant	1476.68	84.9961	3055.44	3207
jgi|Phlrad1|132116|minus.g3725.t1	S03_quant	1904.8	109.008	3048.35	3207
jgi|Phlrad1|132116|minus.g3725.t1	S04_quant	1633.33	94.5581	3062.23	3207
jgi|Phlrad1|132116|minus.g3725.t1	S05_quant	1849.85	105.385	3044.35	3207
jgi|Phlrad1|132116|minus.g3725.t1	S06_quant	1800.63	103.057	3047.63	3207
jgi|Phlrad1|132117|minus.g3726.t1	S01_quant	98.9058	20.1881	870.609	1014
jgi|Phlrad1|132117|minus.g3726.t1	S02_quant	87.6569	17.8749	862.44	1014
jgi|Phlrad1|132117|minus.g3726.t1	S03_quant	100.91	20.5808	855.348	1014
jgi|Phlrad1|132117|minus.g3726.t1	S04_quant	56.5318	11.5298	869.227	1014
jgi|Phlrad1|132117|minus.g3726.t1	S05_quant	77.4949	15.7871	851.348	1014
jgi|Phlrad1|132117|minus.g3726.t1	S06_quant	66.6507	13.6033	854.627	1014
jgi|Phlrad1|132118|minus.g3727.t1	S01_quant	122.358	25.2358	861.609	1005
jgi|Phlrad1|132118|minus.g3727.t1	S02_quant	115.752	23.8529	853.44	1005
jgi|Phlrad1|132118|minus.g3727.t1	S03_quant	84.2648	17.3688	846.348	1005
jgi|Phlrad1|132118|minus.g3727.t1	S04_quant	88.7115	18.2822	860.227	1005
jgi|Phlrad1|132118|minus.g3727.t1	S05_quant	92.0821	18.9592	842.348	1005
jgi|Phlrad1|132118|minus.g3727.t1	S06_quant	105.795	21.8224	845.627	1005
jgi|Phlrad1|132119|plus.g3769.t1	S01_quant	30.5894	45.7934	118.704	246
jgi|Phlrad1|132119|plus.g3769.t1	S02_quant	17.9809	27.9418	113.173	246
jgi|Phlrad1|132119|plus.g3769.t1	S03_quant	8.32245	12.9722	111.921	246
jgi|Phlrad1|132119|plus.g3769.t1	S04_quant	15.655	23.6828	117.187	246
jgi|Phlrad1|132119|plus.g3769.t1	S05_quant	15.499	25.6984	104.6	246
jgi|Phlrad1|132119|plus.g3769.t1	S06_quant	14.8113	23.2883	110.935	246
jgi|Phlrad1|132120|plus.g3770.t1	S01_quant	17.334	18.0985	170.197	306
jgi|Phlrad1|132120|plus.g3770.t1	S02_quant	14.6095	15.7231	163.411	306
jgi|Phlrad1|132120|plus.g3770.t1	S03_quant	13.524	14.7454	160	306
jgi|Phlrad1|132120|plus.g3770.t1	S04_quant	8.6972	9.12627	168.946	306
jgi|Phlrad1|132120|plus.g3770.t1	S05_quant	8.20534	9.30341	152.964	306
jgi|Phlrad1|132120|plus.g3770.t1	S06_quant	14.8113	16.2439	159.045	306
jgi|Phlrad1|132121|plus.g3771.t1	S01_quant	16.3144	12.666	228.889	369
jgi|Phlrad1|132121|plus.g3771.t1	S02_quant	16.8571	13.4221	220.875	369
jgi|Phlrad1|132121|plus.g3771.t1	S03_quant	22.8867	18.4718	216.146	369
jgi|Phlrad1|132121|plus.g3771.t1	S04_quant	18.2641	14.2326	227.497	369
jgi|Phlrad1|132121|plus.g3771.t1	S05_quant	21.8809	18.0298	210.48	369
jgi|Phlrad1|132121|plus.g3771.t1	S06_quant	16.9272	13.7132	215.309	369
jgi|Phlrad1|132122|plus.g3772.t1	S01_quant	890.152	41.446	3816.61	3960
jgi|Phlrad1|132122|plus.g3772.t1	S02_quant	712.493	32.9018	3808.44	3960
jgi|Phlrad1|132122|plus.g3772.t1	S03_quant	717.811	32.9416	3801.35	3960
jgi|Phlrad1|132122|plus.g3772.t1	S04_quant	847.977	39.4026	3815.23	3960
jgi|Phlrad1|132122|plus.g3772.t1	S05_quant	782.242	35.727	3797.35	3960
jgi|Phlrad1|132122|plus.g3772.t1	S06_quant	722.578	33.1624	3800.63	3960
jgi|Phlrad1|132123|minus.g3729.t1	S01_quant	152.947	24.0182	1131.61	1275
jgi|Phlrad1|132123|minus.g3729.t1	S02_quant	176.438	27.6202	1123.44	1275
jgi|Phlrad1|132123|minus.g3729.t1	S03_quant	219.505	34.3018	1116.35	1275
jgi|Phlrad1|132123|minus.g3729.t1	S04_quant	181.772	28.5116	1130.23	1275
jgi|Phlrad1|132123|minus.g3729.t1	S05_quant	158.637	24.7343	1112.35	1275
jgi|Phlrad1|132123|minus.g3729.t1	S06_quant	188.315	29.443	1115.63	1275
jgi|Phlrad1|132124|minus.g3730.t1	S01_quant	0	0	897.609	1041
jgi|Phlrad1|132124|minus.g3730.t1	S02_quant	0	0	889.44	1041
jgi|Phlrad1|132124|minus.g3730.t1	S03_quant	0	0	882.348	1041
jgi|Phlrad1|132124|minus.g3730.t1	S04_quant	0	0	896.227	1041
jgi|Phlrad1|132124|minus.g3730.t1	S05_quant	0	0	878.348	1041
jgi|Phlrad1|132124|minus.g3730.t1	S06_quant	0	0	881.627	1041
jgi|Phlrad1|132125|minus.g3731.t1	S01_quant	22.4322	4.99154	798.609	942
jgi|Phlrad1|132125|minus.g3731.t1	S02_quant	32.5904	7.25114	790.44	942
jgi|Phlrad1|132125|minus.g3731.t1	S03_quant	18.7255	4.17015	783.348	942
jgi|Phlrad1|132125|minus.g3731.t1	S04_quant	20.8733	4.64162	797.227	942
jgi|Phlrad1|132125|minus.g3731.t1	S05_quant	19.1458	4.26067	779.348	942
jgi|Phlrad1|132125|minus.g3731.t1	S06_quant	14.8113	3.30106	782.627	942
jgi|Phlrad1|132126|plus.g3776.t1	S01_quant	375.648	12.1115	5511.61	5655
jgi|Phlrad1|132126|plus.g3776.t1	S02_quant	421.144	13.4581	5503.44	5655
jgi|Phlrad1|132126|plus.g3776.t1	S03_quant	304.069	9.65096	5496.35	5655
jgi|Phlrad1|132126|plus.g3776.t1	S04_quant	340.61	10.9585	5510.23	5655
jgi|Phlrad1|132126|plus.g3776.t1	S05_quant	384.551	12.1432	5492.35	5655
jgi|Phlrad1|132126|plus.g3776.t1	S06_quant	340.6	10.8105	5495.63	5655
jgi|Phlrad1|132127|minus.g3733.t1	S01_quant	20.3483	22.6992	159.3	294
jgi|Phlrad1|132127|minus.g3733.t1	S02_quant	30.0278	34.5538	152.831	294
jgi|Phlrad1|132127|minus.g3733.t1	S03_quant	19.7658	23.0294	149.729	294
jgi|Phlrad1|132127|minus.g3733.t1	S04_quant	26.7281	29.9144	158.398	294
jgi|Phlrad1|132127|minus.g3733.t1	S05_quant	18.2341	22.131	142.896	294
jgi|Phlrad1|132127|minus.g3733.t1	S06_quant	16.5479	19.3466	149.195	294
jgi|Phlrad1|132128|minus.g3734.t1	S01_quant	25.1183	10.4607	426.701	570
jgi|Phlrad1|132128|minus.g3734.t1	S02_quant	25.3222	10.6414	418.491	570
jgi|Phlrad1|132128|minus.g3734.t1	S03_quant	25.708	10.8951	411.632	570
jgi|Phlrad1|132128|minus.g3734.t1	S04_quant	22.2964	9.29254	425.364	570
jgi|Phlrad1|132128|minus.g3734.t1	S05_quant	26.6281	11.3337	407.479	570
jgi|Phlrad1|132128|minus.g3734.t1	S06_quant	30.0605	12.7624	410.847	570
jgi|Phlrad1|132129|plus.g3777.t1	S01_quant	537.354	209.086	456.701	600
jgi|Phlrad1|132129|plus.g3777.t1	S02_quant	530.437	208.001	448.491	600
jgi|Phlrad1|132129|plus.g3777.t1	S03_quant	436.928	172.642	441.505	600
jgi|Phlrad1|132129|plus.g3777.t1	S04_quant	477.464	185.902	455.32	600
jgi|Phlrad1|132129|plus.g3777.t1	S05_quant	533.347	211.461	437.437	600
jgi|Phlrad1|132129|plus.g3777.t1	S06_quant	517.336	204.731	440.763	600
jgi|Phlrad1|132130|minus.g3737.t1	S01_quant	43.8448	5.10037	1527.61	1671
jgi|Phlrad1|132130|minus.g3737.t1	S02_quant	47.1999	5.46315	1519.44	1671
jgi|Phlrad1|132130|minus.g3737.t1	S03_quant	40.5719	4.68001	1512.35	1671
jgi|Phlrad1|132130|minus.g3737.t1	S04_quant	57.4015	6.66754	1526.23	1671
jgi|Phlrad1|132130|minus.g3737.t1	S05_quant	58.3491	6.70917	1508.35	1671
jgi|Phlrad1|132130|minus.g3737.t1	S06_quant	47.6076	5.49349	1511.63	1671
jgi|Phlrad1|132131|plus.g3779.t1	S01_quant	220.244	49.7555	786.609	930
jgi|Phlrad1|132131|plus.g3779.t1	S02_quant	221.39	50.0171	778.44	930
jgi|Phlrad1|132131|plus.g3779.t1	S03_quant	282.963	63.9959	771.348	930
jgi|Phlrad1|132131|plus.g3779.t1	S04_quant	253.958	57.3361	785.227	930
jgi|Phlrad1|132131|plus.g3779.t1	S05_quant	232.485	52.5458	767.348	930
jgi|Phlrad1|132131|plus.g3779.t1	S06_quant	265.545	60.1049	770.627	930
jgi|Phlrad1|132132|minus.g3739.t1	S01_quant	135.613	24.6257	978.609	1122
jgi|Phlrad1|132132|minus.g3739.t1	S02_quant	126.99	23.0137	970.44	1122
jgi|Phlrad1|132132|minus.g3739.t1	S03_quant	131.079	23.7367	963.348	1122
jgi|Phlrad1|132132|minus.g3739.t1	S04_quant	118.282	21.4577	977.227	1122
jgi|Phlrad1|132132|minus.g3739.t1	S05_quant	116.698	21.0972	959.348	1122
jgi|Phlrad1|132132|minus.g3739.t1	S06_quant	134.359	24.3459	962.627	1122
jgi|Phlrad1|132133|minus.g3740.t1	S01_quant	40.7859	5.07332	1428.61	1572
jgi|Phlrad1|132133|minus.g3740.t1	S02_quant	69.676	8.62673	1420.44	1572
jgi|Phlrad1|132133|minus.g3740.t1	S03_quant	60.3377	7.44754	1413.35	1572
jgi|Phlrad1|132133|minus.g3740.t1	S04_quant	60.8804	7.56216	1427.23	1572
jgi|Phlrad1|132133|minus.g3740.t1	S05_quant	58.3491	7.18046	1409.35	1572
jgi|Phlrad1|132133|minus.g3740.t1	S06_quant	46.5497	5.74785	1412.63	1572
jgi|Phlrad1|132134|minus.g3741.t1	S01_quant	894.23	497.378	319.491	462
jgi|Phlrad1|132134|minus.g3741.t1	S02_quant	122.495	69.2593	311.047	462
jgi|Phlrad1|132134|minus.g3741.t1	S03_quant	110.272	63.1025	304.855	462
jgi|Phlrad1|132134|minus.g3741.t1	S04_quant	529.66	295.264	318.015	462
jgi|Phlrad1|132134|minus.g3741.t1	S05_quant	1254.51	724.677	300.237	462
jgi|Phlrad1|132134|minus.g3741.t1	S06_quant	65.5927	37.6131	304.182	462
jgi|Phlrad1|132135|plus.g3783.t1	S01_quant	101.965	14.3395	1263.61	1407
jgi|Phlrad1|132135|plus.g3783.t1	S02_quant	96.6474	13.5388	1255.44	1407
jgi|Phlrad1|132135|plus.g3783.t1	S03_quant	102.99	14.3924	1248.35	1407
jgi|Phlrad1|132135|plus.g3783.t1	S04_quant	154.81	21.7432	1262.23	1407
jgi|Phlrad1|132135|plus.g3783.t1	S05_quant	159.548	22.2375	1244.35	1407
jgi|Phlrad1|132135|plus.g3783.t1	S06_quant	154.46	21.5948	1247.63	1407
jgi|Phlrad1|132136|plus.g3784.t1	S01_quant	1140.98	263.797	768.609	912
jgi|Phlrad1|132136|plus.g3784.t1	S02_quant	1151.9	266.401	760.44	912
jgi|Phlrad1|132136|plus.g3784.t1	S03_quant	1093.36	253.187	753.348	912
jgi|Phlrad1|132136|plus.g3784.t1	S04_quant	1065.41	246.18	767.227	912
jgi|Phlrad1|132136|plus.g3784.t1	S05_quant	1162.42	269.04	749.348	912
jgi|Phlrad1|132136|plus.g3784.t1	S06_quant	1142.58	264.804	752.627	912
jgi|Phlrad1|132137|plus.g3785.t1	S01_quant	17.334	9.379	328.427	471
jgi|Phlrad1|132137|plus.g3785.t1	S02_quant	11.2381	6.17599	320.016	471
jgi|Phlrad1|132137|plus.g3785.t1	S03_quant	12.4837	6.94159	313.73	471
jgi|Phlrad1|132137|plus.g3785.t1	S04_quant	19.1338	10.3738	326.982	471
jgi|Phlrad1|132137|plus.g3785.t1	S05_quant	8.20534	4.60512	309.024	471
jgi|Phlrad1|132137|plus.g3785.t1	S06_quant	12.6954	7.07425	313.027	471
jgi|Phlrad1|132138|plus.g3786.t1	S01_quant	182.517	21.9651	1476.61	1620
jgi|Phlrad1|132138|plus.g3786.t1	S02_quant	212.399	25.438	1468.44	1620
jgi|Phlrad1|132138|plus.g3786.t1	S03_quant	231.988	27.694	1461.35	1620
jgi|Phlrad1|132138|plus.g3786.t1	S04_quant	216.56	26.0244	1475.23	1620
jgi|Phlrad1|132138|plus.g3786.t1	S05_quant	212.427	25.2803	1457.35	1620
jgi|Phlrad1|132138|plus.g3786.t1	S06_quant	232.748	27.7948	1460.63	1620
jgi|Phlrad1|132139|minus.g3746.t1	S01_quant	228.401	67.5775	600.609	744
jgi|Phlrad1|132139|minus.g3746.t1	S02_quant	231.504	68.7227	592.44	744
jgi|Phlrad1|132139|minus.g3746.t1	S03_quant	302.729	90.222	585.348	744
jgi|Phlrad1|132139|minus.g3746.t1	S04_quant	149.592	44.2566	599.227	744
jgi|Phlrad1|132139|minus.g3746.t1	S05_quant	230.661	68.8136	581.348	744
jgi|Phlrad1|132139|minus.g3746.t1	S06_quant	144.939	43.2436	584.627	744
jgi|Phlrad1|132140|plus.g3788.t1	S01_quant	82.5914	6.67245	2199.61	2343
jgi|Phlrad1|132140|plus.g3788.t1	S02_quant	85.4093	6.85427	2191.44	2343
jgi|Phlrad1|132140|plus.g3788.t1	S03_quant	73.8617	5.89889	2184.35	2343
jgi|Phlrad1|132140|plus.g3788.t1	S04_quant	85.2326	6.87376	2198.23	2343
jgi|Phlrad1|132140|plus.g3788.t1	S05_quant	79.3183	6.30934	2180.35	2343
jgi|Phlrad1|132140|plus.g3788.t1	S06_quant	68.7666	5.49307	2183.63	2343
jgi|Phlrad1|132141|minus.g3748.t1	S01_quant	413.977	64.3272	1143.61	1287
jgi|Phlrad1|132141|minus.g3748.t1	S02_quant	334.894	51.8716	1135.44	1287
jgi|Phlrad1|132141|minus.g3748.t1	S03_quant	341.22	52.7551	1128.35	1287
jgi|Phlrad1|132141|minus.g3748.t1	S04_quant	385.286	59.7987	1142.23	1287
jgi|Phlrad1|132141|minus.g3748.t1	S05_quant	371.064	57.2379	1124.35	1287
jgi|Phlrad1|132141|minus.g3748.t1	S06_quant	360.76	55.8045	1127.63	1287
jgi|Phlrad1|132142|plus.g3790.t1	S01_quant	46.9038	3.85769	2160.61	2304
jgi|Phlrad1|132142|plus.g3790.t1	S02_quant	50.5713	4.13199	2152.44	2304
jgi|Phlrad1|132142|plus.g3790.t1	S03_quant	43.6928	3.55292	2145.35	2304
jgi|Phlrad1|132142|plus.g3790.t1	S04_quant	66.0987	5.42695	2159.23	2304
jgi|Phlrad1|132142|plus.g3790.t1	S05_quant	70.2012	5.68583	2141.35	2304
jgi|Phlrad1|132142|plus.g3790.t1	S06_quant	70.8825	5.76506	2144.63	2304
jgi|Phlrad1|132143|minus.g3750.t1	S01_quant	99.9254	10.5283	1686.61	1830
jgi|Phlrad1|132143|minus.g3750.t1	S02_quant	112.381	11.7753	1678.44	1830
jgi|Phlrad1|132143|minus.g3750.t1	S03_quant	81.1439	8.46957	1671.35	1830
jgi|Phlrad1|132143|minus.g3750.t1	S04_quant	136.546	14.3642	1685.23	1830
jgi|Phlrad1|132143|minus.g3750.t1	S05_quant	138.579	14.4148	1667.35	1830
jgi|Phlrad1|132143|minus.g3750.t1	S06_quant	157.634	16.4584	1670.63	1830
jgi|Phlrad1|132144|plus.g3792.t1	S01_quant	42.8252	17.2293	441.701	585
jgi|Phlrad1|132144|plus.g3792.t1	S02_quant	48.3237	19.6049	433.491	585
jgi|Phlrad1|132144|plus.g3792.t1	S03_quant	21.8464	8.93478	426.549	585
jgi|Phlrad1|132144|plus.g3792.t1	S04_quant	60.0107	24.1614	440.32	585
jgi|Phlrad1|132144|plus.g3792.t1	S05_quant	40.115	16.4679	422.479	585
jgi|Phlrad1|132144|plus.g3792.t1	S06_quant	42.3179	17.3352	425.806	585
jgi|Phlrad1|132145|minus.g3752.t1	S01_quant	1832.31	88.3695	3684.61	3828
jgi|Phlrad1|132145|minus.g3752.t1	S02_quant	1841.92	88.1107	3676.44	3828
jgi|Phlrad1|132145|minus.g3752.t1	S03_quant	1924.57	91.499	3669.35	3828
jgi|Phlrad1|132145|minus.g3752.t1	S04_quant	1654.21	79.6201	3683.23	3828
jgi|Phlrad1|132145|minus.g3752.t1	S05_quant	1755.94	83.0867	3665.35	3828
jgi|Phlrad1|132145|minus.g3752.t1	S06_quant	1600.67	76.1055	3668.63	3828
jgi|Phlrad1|132146|minus.g3753.t1	S01_quant	1068.59	54.0448	3513.61	3657
jgi|Phlrad1|132146|minus.g3753.t1	S02_quant	799.026	40.0871	3505.44	3657
jgi|Phlrad1|132146|minus.g3753.t1	S03_quant	964.363	48.0895	3498.35	3657
jgi|Phlrad1|132146|minus.g3753.t1	S04_quant	1007.14	50.8355	3512.23	3657
jgi|Phlrad1|132146|minus.g3753.t1	S05_quant	943.614	46.8343	3494.35	3657
jgi|Phlrad1|132146|minus.g3753.t1	S06_quant	819.909	40.8892	3497.63	3657
jgi|Phlrad1|132147|minus.g3754.t1	S01_quant	8.15718	12.2116	118.704	246
jgi|Phlrad1|132147|minus.g3754.t1	S02_quant	3.37142	5.23909	113.173	246
jgi|Phlrad1|132147|minus.g3754.t1	S03_quant	2.08061	3.24304	111.921	246
jgi|Phlrad1|132147|minus.g3754.t1	S04_quant	3.47888	5.26284	117.187	246
jgi|Phlrad1|132147|minus.g3754.t1	S05_quant	5.47023	9.07002	104.6	246
jgi|Phlrad1|132147|minus.g3754.t1	S06_quant	6.34768	9.98072	110.935	246
jgi|Phlrad1|132148|minus.g3755.t1	S01_quant	392.564	96.0077	726.609	870
jgi|Phlrad1|132148|minus.g3755.t1	S02_quant	382.094	93.5332	718.44	870
jgi|Phlrad1|132148|minus.g3755.t1	S03_quant	578.41	141.849	711.348	870
jgi|Phlrad1|132148|minus.g3755.t1	S04_quant	387.026	94.6077	725.227	870
jgi|Phlrad1|132148|minus.g3755.t1	S05_quant	298.127	73.0979	707.348	870
jgi|Phlrad1|132148|minus.g3755.t1	S06_quant	351.238	86.2138	710.627	870
jgi|Phlrad1|132149|minus.g3756.t1	S01_quant	219.224	26.17	1488.61	1632
jgi|Phlrad1|132149|minus.g3756.t1	S02_quant	238.247	28.3023	1480.44	1632
jgi|Phlrad1|132149|minus.g3756.t1	S03_quant	237.19	28.0843	1473.35	1632
jgi|Phlrad1|132149|minus.g3756.t1	S04_quant	200.036	23.8447	1487.23	1632
jgi|Phlrad1|132149|minus.g3756.t1	S05_quant	205.133	24.213	1469.35	1632
jgi|Phlrad1|132149|minus.g3756.t1	S06_quant	230.632	27.3177	1472.63	1632
jgi|Phlrad1|132150|minus.g3757.t1	S01_quant	1174.63	90.4557	2307.61	2451
jgi|Phlrad1|132150|minus.g3757.t1	S02_quant	858.588	65.6672	2299.44	2451
jgi|Phlrad1|132150|minus.g3757.t1	S03_quant	705.327	53.6763	2292.35	2451
jgi|Phlrad1|132150|minus.g3757.t1	S04_quant	1015.83	78.0875	2306.23	2451
jgi|Phlrad1|132150|minus.g3757.t1	S05_quant	785.889	59.5628	2288.35	2451
jgi|Phlrad1|132150|minus.g3757.t1	S06_quant	743.737	56.6098	2291.63	2451
jgi|Phlrad1|132151|minus.g3758.t1	S01_quant	1206.24	138.417	1548.61	1692
jgi|Phlrad1|132151|minus.g3758.t1	S02_quant	1109.2	126.634	1540.44	1692
jgi|Phlrad1|132151|minus.g3758.t1	S03_quant	1167.22	132.796	1533.35	1692
jgi|Phlrad1|132151|minus.g3758.t1	S04_quant	1175.86	134.73	1547.23	1692
jgi|Phlrad1|132151|minus.g3758.t1	S05_quant	1150.57	130.48	1529.35	1692
jgi|Phlrad1|132151|minus.g3758.t1	S06_quant	1184.9	134.853	1532.63	1692
jgi|Phlrad1|132152|plus.g3799.t1	S01_quant	1346.95	78.8242	3036.61	3180
jgi|Phlrad1|132152|plus.g3799.t1	S02_quant	1156.4	67.1543	3028.44	3180
jgi|Phlrad1|132152|plus.g3799.t1	S03_quant	1253.57	72.3802	3021.35	3180
jgi|Phlrad1|132152|plus.g3799.t1	S04_quant	1395.03	81.4805	3035.23	3180
jgi|Phlrad1|132152|plus.g3799.t1	S05_quant	1308.3	75.1998	3017.35	3180
jgi|Phlrad1|132152|plus.g3799.t1	S06_quant	1217.7	70.3167	3020.63	3180
jgi|Phlrad1|132153|minus.g3760.t1	S01_quant	9.17682	4.10994	396.783	540
jgi|Phlrad1|132153|minus.g3760.t1	S02_quant	16.8571	7.63029	388.533	540
jgi|Phlrad1|132153|minus.g3760.t1	S03_quant	11.4434	5.22662	381.949	540
jgi|Phlrad1|132153|minus.g3760.t1	S04_quant	13.9155	6.23905	395.405	540
jgi|Phlrad1|132153|minus.g3760.t1	S05_quant	13.6756	6.28264	377.52	540
jgi|Phlrad1|132153|minus.g3760.t1	S06_quant	8.46358	3.87312	381.162	540
jgi|Phlrad1|132154|minus.g3761.t1	S01_quant	7.13753	13.8758	91.4083	210
jgi|Phlrad1|132154|minus.g3761.t1	S02_quant	7.86665	15.838	87.3526	210
jgi|Phlrad1|132154|minus.g3761.t1	S03_quant	5.20153	10.5128	86.3144	210
jgi|Phlrad1|132154|minus.g3761.t1	S04_quant	2.60916	5.15501	89.7289	210
jgi|Phlrad1|132154|minus.g3761.t1	S05_quant	3.64682	7.97011	79.3572	210
jgi|Phlrad1|132154|minus.g3761.t1	S06_quant	6.34768	12.8425	86.2152	210
jgi|Phlrad1|132155|plus.g3800.t1	S01_quant	113.181	23.3431	861.609	1005
jgi|Phlrad1|132155|plus.g3800.t1	S02_quant	102.266	21.0739	853.44	1005
jgi|Phlrad1|132155|plus.g3800.t1	S03_quant	125.877	25.946	846.348	1005
jgi|Phlrad1|132155|plus.g3800.t1	S04_quant	91.3206	18.8199	860.227	1005
jgi|Phlrad1|132155|plus.g3800.t1	S05_quant	119.433	24.5906	842.348	1005
jgi|Phlrad1|132155|plus.g3800.t1	S06_quant	97.3311	20.0766	845.627	1005
jgi|Phlrad1|132156|minus.g3762.t1	S01_quant	33.6483	56.0751	106.632	231
jgi|Phlrad1|132156|minus.g3762.t1	S02_quant	25.8475	44.5611	102.012	231
jgi|Phlrad1|132156|minus.g3762.t1	S03_quant	28.0883	48.389	101.263	231
jgi|Phlrad1|132156|minus.g3762.t1	S04_quant	33.0494	55.4996	105.569	231
jgi|Phlrad1|132156|minus.g3762.t1	S05_quant	40.115	74.2378	93.7169	231
jgi|Phlrad1|132156|minus.g3762.t1	S06_quant	25.3907	44.222	100.151	231
jgi|Phlrad1|132157|minus.g3763.t1	S01_quant	106.043	48.9638	384.861	528
jgi|Phlrad1|132157|minus.g3763.t1	S02_quant	74.1712	34.6362	376.609	528
jgi|Phlrad1|132157|minus.g3763.t1	S03_quant	86.3454	40.7122	369.987	528
jgi|Phlrad1|132157|minus.g3763.t1	S04_quant	89.5812	41.4	383.599	528
jgi|Phlrad1|132157|minus.g3763.t1	S05_quant	68.3778	32.4411	365.557	528
jgi|Phlrad1|132157|minus.g3763.t1	S06_quant	62.4189	29.4897	369.2	528
jgi|Phlrad1|132158|plus.g3801.t1	S01_quant	197.812	11.2752	3117.61	3261
jgi|Phlrad1|132158|plus.g3801.t1	S02_quant	204.533	11.5682	3109.44	3261
jgi|Phlrad1|132158|plus.g3801.t1	S03_quant	186.215	10.4712	3102.35	3261
jgi|Phlrad1|132158|plus.g3801.t1	S04_quant	230.476	13.1117	3116.23	3261
jgi|Phlrad1|132158|plus.g3801.t1	S05_quant	211.515	11.8399	3098.35	3261
jgi|Phlrad1|132158|plus.g3801.t1	S06_quant	213.705	12.0183	3101.63	3261
jgi|Phlrad1|132159|minus.g3765.t1	S01_quant	424.173	31.0499	2427.61	2571
jgi|Phlrad1|132159|minus.g3765.t1	S02_quant	437.161	31.7769	2419.44	2571
jgi|Phlrad1|132159|minus.g3765.t1	S03_quant	382.833	27.6848	2412.35	2571
jgi|Phlrad1|132159|minus.g3765.t1	S04_quant	420.075	30.6942	2426.23	2571
jgi|Phlrad1|132159|minus.g3765.t1	S05_quant	453.117	32.6308	2408.35	2571
jgi|Phlrad1|132159|minus.g3765.t1	S06_quant	423.179	30.6077	2411.63	2571
jgi|Phlrad1|132160|minus.g3766.t1	S01_quant	52.002	8.10176	1140.61	1284
jgi|Phlrad1|132160|minus.g3766.t1	S02_quant	109.009	16.9291	1132.44	1284
jgi|Phlrad1|132160|minus.g3766.t1	S03_quant	64.499	9.99859	1125.35	1284
jgi|Phlrad1|132160|minus.g3766.t1	S04_quant	68.7079	10.692	1139.23	1284
jgi|Phlrad1|132160|minus.g3766.t1	S05_quant	73.8481	11.4218	1121.35	1284
jgi|Phlrad1|132160|minus.g3766.t1	S06_quant	102.621	15.9164	1124.63	1284
jgi|Phlrad1|132161|minus.g3767.t1	S01_quant	240.637	61.1227	699.609	843
jgi|Phlrad1|132161|minus.g3767.t1	S02_quant	267.466	68.0299	691.44	843
jgi|Phlrad1|132161|minus.g3767.t1	S03_quant	333.938	85.1259	684.348	843
jgi|Phlrad1|132161|minus.g3767.t1	S04_quant	226.997	57.6347	698.227	843
jgi|Phlrad1|132161|minus.g3767.t1	S05_quant	244.337	62.2865	680.348	843
jgi|Phlrad1|132161|minus.g3767.t1	S06_quant	246.502	62.8951	683.627	843
jgi|Phlrad1|132162|plus.g3805.t1	S01_quant	0	0	1038.61	1182
jgi|Phlrad1|132162|plus.g3805.t1	S02_quant	0	0	1030.44	1182
jgi|Phlrad1|132162|plus.g3805.t1	S03_quant	0	0	1023.35	1182
jgi|Phlrad1|132162|plus.g3805.t1	S04_quant	0	0	1037.23	1182
jgi|Phlrad1|132162|plus.g3805.t1	S05_quant	0	0	1019.35	1182
jgi|Phlrad1|132162|plus.g3805.t1	S06_quant	0	0	1022.63	1182
jgi|Phlrad1|132163|minus.g3769.t1	S01_quant	0	0	1332.61	1476
jgi|Phlrad1|132163|minus.g3769.t1	S02_quant	0	0	1324.44	1476
jgi|Phlrad1|132163|minus.g3769.t1	S03_quant	0	0	1317.35	1476
jgi|Phlrad1|132163|minus.g3769.t1	S04_quant	0	0	1331.23	1476
jgi|Phlrad1|132163|minus.g3769.t1	S05_quant	0	0	1313.35	1476
jgi|Phlrad1|132163|minus.g3769.t1	S06_quant	0	0	1316.63	1476
jgi|Phlrad1|132164|plus.g3807.t1	S01_quant	0	0	1182.61	1326
jgi|Phlrad1|132164|plus.g3807.t1	S02_quant	0	0	1174.44	1326
jgi|Phlrad1|132164|plus.g3807.t1	S03_quant	0	0	1167.35	1326
jgi|Phlrad1|132164|plus.g3807.t1	S04_quant	0	0	1181.23	1326
jgi|Phlrad1|132164|plus.g3807.t1	S05_quant	0	0	1163.35	1326
jgi|Phlrad1|132164|plus.g3807.t1	S06_quant	0	0	1166.63	1326
jgi|Phlrad1|132165|plus.g3808.t1	S01_quant	0	0	453.701	597
jgi|Phlrad1|132165|plus.g3808.t1	S02_quant	0	0	445.491	597
jgi|Phlrad1|132165|plus.g3808.t1	S03_quant	0	0	438.505	597
jgi|Phlrad1|132165|plus.g3808.t1	S04_quant	0	0	452.32	597
jgi|Phlrad1|132165|plus.g3808.t1	S05_quant	0	0	434.437	597
jgi|Phlrad1|132165|plus.g3808.t1	S06_quant	0	0	437.763	597
jgi|Phlrad1|132166|minus.g3772.t1	S01_quant	0	0	1377.61	1521
jgi|Phlrad1|132166|minus.g3772.t1	S02_quant	0	0	1369.44	1521
jgi|Phlrad1|132166|minus.g3772.t1	S03_quant	0	0	1362.35	1521
jgi|Phlrad1|132166|minus.g3772.t1	S04_quant	0	0	1376.23	1521
jgi|Phlrad1|132166|minus.g3772.t1	S05_quant	0	0	1358.35	1521
jgi|Phlrad1|132166|minus.g3772.t1	S06_quant	0	0	1361.63	1521
jgi|Phlrad1|132167|plus.g3810.t1	S01_quant	1338.8	108.16	2199.61	2343
jgi|Phlrad1|132167|plus.g3810.t1	S02_quant	1260.91	101.191	2191.44	2343
jgi|Phlrad1|132167|plus.g3810.t1	S03_quant	1250.45	99.8657	2184.35	2343
jgi|Phlrad1|132167|plus.g3810.t1	S04_quant	1328.06	107.104	2198.23	2343
jgi|Phlrad1|132167|plus.g3810.t1	S05_quant	1378.5	109.652	2180.35	2343
jgi|Phlrad1|132167|plus.g3810.t1	S06_quant	1271.65	101.58	2183.63	2343
jgi|Phlrad1|132168|minus.g3774.t1	S01_quant	40.7859	5.61579	1290.61	1434
jgi|Phlrad1|132168|minus.g3774.t1	S02_quant	52.8189	7.24333	1282.44	1434
jgi|Phlrad1|132168|minus.g3774.t1	S03_quant	39.5316	5.4074	1275.35	1434
jgi|Phlrad1|132168|minus.g3774.t1	S04_quant	43.486	5.97973	1289.23	1434
jgi|Phlrad1|132168|minus.g3774.t1	S05_quant	37.3799	5.09929	1271.35	1434
jgi|Phlrad1|132168|minus.g3774.t1	S06_quant	66.6507	9.1209	1274.63	1434
jgi|Phlrad1|132169|minus.g3775.t1	S01_quant	1.01965	1.13745	159.3	294
jgi|Phlrad1|132169|minus.g3775.t1	S02_quant	3.37142	3.87959	152.831	294
jgi|Phlrad1|132169|minus.g3775.t1	S03_quant	3.12092	3.63621	149.729	294
jgi|Phlrad1|132169|minus.g3775.t1	S04_quant	3.47888	3.8936	158.398	294
jgi|Phlrad1|132169|minus.g3775.t1	S05_quant	0.911704	1.10655	142.896	294
jgi|Phlrad1|132169|minus.g3775.t1	S06_quant	2.11589	2.47375	149.195	294
jgi|Phlrad1|132170|plus.g3812.t1	S01_quant	36.7073	5.11365	1275.61	1419
jgi|Phlrad1|132170|plus.g3812.t1	S02_quant	71.9236	9.97999	1267.44	1419
jgi|Phlrad1|132170|plus.g3812.t1	S03_quant	49.9347	6.91169	1260.35	1419
jgi|Phlrad1|132170|plus.g3812.t1	S04_quant	39.1374	5.44511	1274.23	1419
jgi|Phlrad1|132170|plus.g3812.t1	S05_quant	50.1437	6.92218	1256.35	1419
jgi|Phlrad1|132170|plus.g3812.t1	S06_quant	62.4189	8.64352	1259.63	1419
jgi|Phlrad1|132171|minus.g3777.t1	S01_quant	545.511	21.7128	4464.61	4608
jgi|Phlrad1|132171|minus.g3777.t1	S02_quant	674.284	26.6097	4456.44	4608
jgi|Phlrad1|132171|minus.g3777.t1	S03_quant	653.312	25.6152	4449.35	4608
jgi|Phlrad1|132171|minus.g3777.t1	S04_quant	678.382	26.9455	4463.23	4608
jgi|Phlrad1|132171|minus.g3777.t1	S05_quant	680.131	26.5353	4445.35	4608
jgi|Phlrad1|132171|minus.g3777.t1	S06_quant	727.868	28.5393	4448.63	4608
jgi|Phlrad1|132172|minus.g3778.t1	S01_quant	868.739	233.691	660.609	804
jgi|Phlrad1|132172|minus.g3778.t1	S02_quant	781.046	210.534	652.44	804
jgi|Phlrad1|132172|minus.g3778.t1	S03_quant	892.582	241.283	645.348	804
jgi|Phlrad1|132172|minus.g3778.t1	S04_quant	953.213	256.34	659.227	804
jgi|Phlrad1|132172|minus.g3778.t1	S05_quant	817.799	221.151	641.348	804
jgi|Phlrad1|132172|minus.g3778.t1	S06_quant	895.023	242.182	644.627	804
jgi|Phlrad1|132173|plus.g3815.t1	S01_quant	186.595	27.8268	1191.61	1335
jgi|Phlrad1|132173|plus.g3815.t1	S02_quant	180.933	26.8879	1183.44	1335
jgi|Phlrad1|132173|plus.g3815.t1	S03_quant	186.215	27.6154	1176.35	1335
jgi|Phlrad1|132173|plus.g3815.t1	S04_quant	189.599	28.2402	1190.23	1335
jgi|Phlrad1|132173|plus.g3815.t1	S05_quant	168.665	24.952	1172.35	1335
jgi|Phlrad1|132173|plus.g3815.t1	S06_quant	178.793	26.5276	1175.63	1335
jgi|Phlrad1|132174|minus.g3780.t1	S01_quant	157.026	28.3402	984.609	1128
jgi|Phlrad1|132174|minus.g3780.t1	S02_quant	126.99	22.8723	976.44	1128
jgi|Phlrad1|132174|minus.g3780.t1	S03_quant	127.958	23.0282	969.348	1128
jgi|Phlrad1|132174|minus.g3780.t1	S04_quant	153.94	27.7562	983.227	1128
jgi|Phlrad1|132174|minus.g3780.t1	S05_quant	115.786	20.8022	965.348	1128
jgi|Phlrad1|132174|minus.g3780.t1	S06_quant	148.113	26.6718	968.627	1128
jgi|Phlrad1|132175|plus.g3817.t1	S01_quant	86.67	17.8133	864.609	1008
jgi|Phlrad1|132175|plus.g3817.t1	S02_quant	89.9045	18.4616	856.44	1008
jgi|Phlrad1|132175|plus.g3817.t1	S03_quant	64.499	13.2477	849.348	1008
jgi|Phlrad1|132175|plus.g3817.t1	S04_quant	98.2784	20.1834	863.227	1008
jgi|Phlrad1|132175|plus.g3817.t1	S05_quant	104.846	21.5106	845.348	1008
jgi|Phlrad1|132175|plus.g3817.t1	S06_quant	89.9255	18.4834	848.627	1008
jgi|Phlrad1|132176|plus.g3818.t1	S01_quant	581.199	85.8095	1203.61	1347
jgi|Phlrad1|132176|plus.g3818.t1	S02_quant	519.199	76.3821	1195.44	1347
jgi|Phlrad1|132176|plus.g3818.t1	S03_quant	513.911	75.4427	1188.35	1347
jgi|Phlrad1|132176|plus.g3818.t1	S04_quant	557.491	82.2076	1202.23	1347
jgi|Phlrad1|132176|plus.g3818.t1	S05_quant	530.612	77.7023	1184.35	1347
jgi|Phlrad1|132176|plus.g3818.t1	S06_quant	526.858	77.3802	1187.63	1347
jgi|Phlrad1|132177|plus.g3819.t1	S01_quant	198.831	29.9531	1179.61	1323
jgi|Phlrad1|132177|plus.g3819.t1	S02_quant	193.295	29.0192	1171.44	1323
jgi|Phlrad1|132177|plus.g3819.t1	S03_quant	224.706	33.667	1164.35	1323
jgi|Phlrad1|132177|plus.g3819.t1	S04_quant	236.564	35.5943	1178.23	1323
jgi|Phlrad1|132177|plus.g3819.t1	S05_quant	206.957	30.9334	1160.35	1323
jgi|Phlrad1|132177|plus.g3819.t1	S06_quant	244.386	36.6335	1163.63	1323
jgi|Phlrad1|132178|minus.g3784.t1	S01_quant	96.8665	24.292	708.609	852
jgi|Phlrad1|132178|minus.g3784.t1	S02_quant	75.295	18.9052	700.44	852
jgi|Phlrad1|132178|minus.g3784.t1	S03_quant	67.6199	17.0136	693.348	852
jgi|Phlrad1|132178|minus.g3784.t1	S04_quant	99.1481	24.8534	707.227	852
jgi|Phlrad1|132178|minus.g3784.t1	S05_quant	100.287	25.2316	689.348	852
jgi|Phlrad1|132178|minus.g3784.t1	S06_quant	76.1722	19.1829	692.627	852
jgi|Phlrad1|132179|plus.g3821.t1	S01_quant	80.5521	15.532	921.609	1065
jgi|Phlrad1|132179|plus.g3821.t1	S02_quant	82.0379	15.795	913.44	1065
jgi|Phlrad1|132179|plus.g3821.t1	S03_quant	93.6275	18.0211	906.348	1065
jgi|Phlrad1|132179|plus.g3821.t1	S04_quant	60.0107	11.561	920.227	1065
jgi|Phlrad1|132179|plus.g3821.t1	S05_quant	70.2012	13.4929	902.348	1065
jgi|Phlrad1|132179|plus.g3821.t1	S06_quant	69.8245	13.4485	905.627	1065
jgi|Phlrad1|132180|minus.g3786.t1	S01_quant	129.495	21.0613	1092.61	1236
jgi|Phlrad1|132180|minus.g3786.t1	S02_quant	141.6	22.9637	1084.44	1236
jgi|Phlrad1|132180|minus.g3786.t1	S03_quant	158.126	25.6048	1077.35	1236
jgi|Phlrad1|132180|minus.g3786.t1	S04_quant	162.638	26.4221	1091.23	1236
jgi|Phlrad1|132180|minus.g3786.t1	S05_quant	151.343	24.4544	1073.35	1236
jgi|Phlrad1|132180|minus.g3786.t1	S06_quant	143.881	23.3106	1076.63	1236
jgi|Phlrad1|132181|plus.g3823.t1	S01_quant	506.765	31.9951	2814.61	2958
jgi|Phlrad1|132181|plus.g3823.t1	S02_quant	474.246	29.719	2806.44	2958
jgi|Phlrad1|132181|plus.g3823.t1	S03_quant	505.589	31.5074	2799.35	2958
jgi|Phlrad1|132181|plus.g3823.t1	S04_quant	510.526	32.1717	2813.23	2958
jgi|Phlrad1|132181|plus.g3823.t1	S05_quant	528.789	32.8082	2795.35	2958
jgi|Phlrad1|132181|plus.g3823.t1	S06_quant	544.843	33.958	2798.63	2958
jgi|Phlrad1|132182|minus.g3788.t1	S01_quant	38.7466	12.3925	555.609	699
jgi|Phlrad1|132182|minus.g3788.t1	S02_quant	48.3237	15.5242	547.44	699
jgi|Phlrad1|132182|minus.g3788.t1	S03_quant	50.975	16.4539	540.458	699
jgi|Phlrad1|132182|minus.g3788.t1	S04_quant	53.9227	17.2482	554.227	699
jgi|Phlrad1|132182|minus.g3788.t1	S05_quant	41.0267	13.2665	536.348	699
jgi|Phlrad1|132182|minus.g3788.t1	S06_quant	61.3609	19.8342	539.627	699
jgi|Phlrad1|132183|plus.g3825.t1	S01_quant	193.733	39.9567	861.609	1005
jgi|Phlrad1|132183|plus.g3825.t1	S02_quant	164.076	33.8109	853.44	1005
jgi|Phlrad1|132183|plus.g3825.t1	S03_quant	167.489	34.5232	846.348	1005
jgi|Phlrad1|132183|plus.g3825.t1	S04_quant	166.986	34.4135	860.227	1005
jgi|Phlrad1|132183|plus.g3825.t1	S05_quant	167.754	34.5395	842.348	1005
jgi|Phlrad1|132183|plus.g3825.t1	S06_quant	161.866	33.3882	845.627	1005
jgi|Phlrad1|132184|plus.g3826.t1	S01_quant	145.81	20.0765	1290.61	1434
jgi|Phlrad1|132184|plus.g3826.t1	S02_quant	192.171	26.3534	1282.44	1434
jgi|Phlrad1|132184|plus.g3826.t1	S03_quant	146.683	20.0643	1275.35	1434
jgi|Phlrad1|132184|plus.g3826.t1	S04_quant	166.986	22.9621	1289.23	1434
jgi|Phlrad1|132184|plus.g3826.t1	S05_quant	135.844	18.5316	1271.35	1434
jgi|Phlrad1|132184|plus.g3826.t1	S06_quant	162.924	22.2955	1274.63	1434
jgi|Phlrad1|132185|plus.g3827.t1	S01_quant	56.0806	10.3744	960.609	1104
jgi|Phlrad1|132185|plus.g3827.t1	S02_quant	62.9332	11.6206	952.44	1104
jgi|Phlrad1|132185|plus.g3827.t1	S03_quant	57.2168	10.5586	945.348	1104
jgi|Phlrad1|132185|plus.g3827.t1	S04_quant	56.5318	10.448	959.227	1104
jgi|Phlrad1|132185|plus.g3827.t1	S05_quant	49.232	9.07055	941.348	1104
jgi|Phlrad1|132185|plus.g3827.t1	S06_quant	48.6656	8.98624	944.627	1104
jgi|Phlrad1|132186|minus.g3792.t1	S01_quant	93.8075	61.8176	269.663	411
jgi|Phlrad1|132186|minus.g3792.t1	S02_quant	161.828	108.98	261.152	411
jgi|Phlrad1|132186|minus.g3792.t1	S03_quant	111.313	75.9179	255.784	411
jgi|Phlrad1|132186|minus.g3792.t1	S04_quant	152.201	100.73	267.868	411
jgi|Phlrad1|132186|minus.g3792.t1	S05_quant	193.281	133.694	250.734	411
jgi|Phlrad1|132186|minus.g3792.t1	S06_quant	290.935	199.237	254.709	411
jgi|Phlrad1|132187|minus.g3793.t1	S01_quant	21.4126	5.19389	732.609	876
jgi|Phlrad1|132187|minus.g3793.t1	S02_quant	26.9714	6.54766	724.44	876
jgi|Phlrad1|132187|minus.g3793.t1	S03_quant	19.7658	4.80682	717.348	876
jgi|Phlrad1|132187|minus.g3793.t1	S04_quant	23.4824	5.69314	731.227	876
jgi|Phlrad1|132187|minus.g3793.t1	S05_quant	24.616	5.98484	713.348	876
jgi|Phlrad1|132187|minus.g3793.t1	S06_quant	22.2169	5.40763	716.627	876
jgi|Phlrad1|132188|plus.g3829.t1	S01_quant	1666.1	74.9245	3951.61	4095
jgi|Phlrad1|132188|plus.g3829.t1	S02_quant	1517.14	67.6606	3943.44	4095
jgi|Phlrad1|132188|plus.g3829.t1	S03_quant	1479.31	65.5601	3936.35	4095
jgi|Phlrad1|132188|plus.g3829.t1	S04_quant	1555.93	69.8279	3950.23	4095
jgi|Phlrad1|132188|plus.g3829.t1	S05_quant	1493.37	65.8646	3932.35	4095
jgi|Phlrad1|132188|plus.g3829.t1	S06_quant	1447.27	64.1435	3935.63	4095
jgi|Phlrad1|132189|plus.g3830.t1	S01_quant	261.03	137.497	337.36	480
jgi|Phlrad1|132189|plus.g3830.t1	S02_quant	251.733	134.611	328.887	480
jgi|Phlrad1|132189|plus.g3830.t1	S03_quant	299.608	162.065	322.506	480
jgi|Phlrad1|132189|plus.g3830.t1	S04_quant	233.085	123.011	335.916	480
jgi|Phlrad1|132189|plus.g3830.t1	S05_quant	272.6	148.707	317.93	480
jgi|Phlrad1|132189|plus.g3830.t1	S06_quant	248.618	134.786	321.74	480
jgi|Phlrad1|132190|minus.g3795.t1	S01_quant	0	0	293.13	435
jgi|Phlrad1|132190|minus.g3795.t1	S02_quant	1.12381	0.694704	284.497	435
jgi|Phlrad1|132190|minus.g3795.t1	S03_quant	1.04031	0.651324	278.636	435
jgi|Phlrad1|132190|minus.g3795.t1	S04_quant	0.86972	0.528828	291.559	435
jgi|Phlrad1|132190|minus.g3795.t1	S05_quant	0.911704	0.577361	273.869	435
jgi|Phlrad1|132190|minus.g3795.t1	S06_quant	0	0	277.793	435
jgi|Phlrad1|132191|plus.g3832.t1	S01_quant	359.935	34.5439	1851.61	1995
jgi|Phlrad1|132191|plus.g3832.t1	S02_quant	395.58	37.7391	1843.44	1995
jgi|Phlrad1|132191|plus.g3832.t1	S03_quant	434.848	41.31	1836.35	1995
jgi|Phlrad1|132191|plus.g3832.t1	S04_quant	381.807	36.5831	1850.23	1995
jgi|Phlrad1|132191|plus.g3832.t1	S05_quant	421.207	39.868	1832.35	1995
jgi|Phlrad1|132191|plus.g3832.t1	S06_quant	405.194	38.503	1835.63	1995
jgi|Phlrad1|132192|minus.g3797.t1	S01_quant	77.4932	14.2465	966.609	1110
jgi|Phlrad1|132192|minus.g3797.t1	S02_quant	96.6474	17.7342	958.44	1110
jgi|Phlrad1|132192|minus.g3797.t1	S03_quant	107.151	19.6486	951.348	1110
jgi|Phlrad1|132192|minus.g3797.t1	S04_quant	101.757	18.6895	965.227	1110
jgi|Phlrad1|132192|minus.g3797.t1	S05_quant	95.729	17.5255	947.348	1110
jgi|Phlrad1|132192|minus.g3797.t1	S06_quant	148.113	27.1768	950.627	1110
jgi|Phlrad1|132193|plus.g3834.t1	S01_quant	559.786	154.8	642.609	786
jgi|Phlrad1|132193|plus.g3834.t1	S02_quant	555.16	153.891	634.44	786
jgi|Phlrad1|132193|plus.g3834.t1	S03_quant	446.291	124.103	627.348	786
jgi|Phlrad1|132193|plus.g3834.t1	S04_quant	513.135	141.867	641.227	786
jgi|Phlrad1|132193|plus.g3834.t1	S05_quant	483.203	134.442	623.348	786
jgi|Phlrad1|132193|plus.g3834.t1	S06_quant	579.755	161.381	626.627	786
jgi|Phlrad1|132194|plus.g3835.t1	S01_quant	22.4322	5.5089	723.609	867
jgi|Phlrad1|132194|plus.g3835.t1	S02_quant	13.4857	3.31501	715.44	867
jgi|Phlrad1|132194|plus.g3835.t1	S03_quant	14.5643	3.58687	708.348	867
jgi|Phlrad1|132194|plus.g3835.t1	S04_quant	22.6127	5.5506	722.227	867
jgi|Phlrad1|132194|plus.g3835.t1	S05_quant	11.8522	2.91841	704.348	867
jgi|Phlrad1|132194|plus.g3835.t1	S06_quant	23.2748	5.73718	707.627	867
jgi|Phlrad1|132195|plus.g3836.t1	S01_quant	29.5698	5.81518	903.609	1047
jgi|Phlrad1|132195|plus.g3836.t1	S02_quant	51.6951	10.1531	895.44	1047
jgi|Phlrad1|132195|plus.g3836.t1	S03_quant	27.048	5.31158	888.348	1047
jgi|Phlrad1|132195|plus.g3836.t1	S04_quant	24.3522	4.78501	902.227	1047
jgi|Phlrad1|132195|plus.g3836.t1	S05_quant	37.3799	7.33079	884.348	1047
jgi|Phlrad1|132195|plus.g3836.t1	S06_quant	43.3758	8.52381	887.627	1047
jgi|Phlrad1|132196|plus.g3837.t1	S01_quant	393.173	84.0156	831.609	975
jgi|Phlrad1|132196|plus.g3837.t1	S02_quant	626.88	133.887	823.44	975
jgi|Phlrad1|132196|plus.g3837.t1	S03_quant	704.211	150.487	816.348	975
jgi|Phlrad1|132196|plus.g3837.t1	S04_quant	253.795	54.1935	830.227	975
jgi|Phlrad1|132196|plus.g3837.t1	S05_quant	189.393	40.4351	812.348	975
jgi|Phlrad1|132196|plus.g3837.t1	S06_quant	228.267	48.8166	815.627	975
jgi|Phlrad1|132197|minus.g3800.t1	S01_quant	52.002	6.84205	1350.61	1494
jgi|Phlrad1|132197|minus.g3800.t1	S02_quant	62.9332	8.24462	1342.44	1494
jgi|Phlrad1|132197|minus.g3800.t1	S03_quant	66.5796	8.698	1335.35	1494
jgi|Phlrad1|132197|minus.g3800.t1	S04_quant	59.141	7.77078	1349.23	1494
jgi|Phlrad1|132197|minus.g3800.t1	S05_quant	53.7906	7.0073	1331.35	1494
jgi|Phlrad1|132197|minus.g3800.t1	S06_quant	44.4338	5.80724	1334.63	1494
jgi|Phlrad1|132198|plus.g3839.t1	S01_quant	19.3733	5.9706	576.609	720
jgi|Phlrad1|132198|plus.g3839.t1	S02_quant	5.61903	1.73845	568.44	720
jgi|Phlrad1|132198|plus.g3839.t1	S03_quant	8.32245	2.58638	561.348	720
jgi|Phlrad1|132198|plus.g3839.t1	S04_quant	11.3064	3.48453	575.227	720
jgi|Phlrad1|132198|plus.g3839.t1	S05_quant	20.0575	6.24146	557.348	720
jgi|Phlrad1|132198|plus.g3839.t1	S06_quant	13.7533	4.27907	560.627	720
jgi|Phlrad1|132199|plus.g3840.t1	S01_quant	46.1329	6.02966	1359.61	1503
jgi|Phlrad1|132199|plus.g3840.t1	S02_quant	47.1999	6.14228	1351.44	1503
jgi|Phlrad1|132199|plus.g3840.t1	S03_quant	63.4587	8.23478	1344.35	1503
jgi|Phlrad1|132199|plus.g3840.t1	S04_quant	58.2713	7.60577	1358.23	1503
jgi|Phlrad1|132199|plus.g3840.t1	S05_quant	50.1437	6.48837	1340.35	1503
jgi|Phlrad1|132199|plus.g3840.t1	S06_quant	43.3758	5.631	1343.63	1503
jgi|Phlrad1|132200|plus.g3841.t1	S01_quant	58.1199	12.6476	816.609	960
jgi|Phlrad1|132200|plus.g3841.t1	S02_quant	64.057	13.9349	808.44	960
jgi|Phlrad1|132200|plus.g3841.t1	S03_quant	39.5316	8.6059	801.348	960
jgi|Phlrad1|132200|plus.g3841.t1	S04_quant	44.3557	9.64567	815.227	960
jgi|Phlrad1|132200|plus.g3841.t1	S05_quant	48.3203	10.5104	797.348	960
jgi|Phlrad1|132200|plus.g3841.t1	S06_quant	41.2599	8.98907	800.627	960
jgi|Phlrad1|132201|minus.g3803.t1	S01_quant	46.2953	13.0459	630.609	774
jgi|Phlrad1|132201|minus.g3803.t1	S02_quant	47.4043	13.3939	622.44	774
jgi|Phlrad1|132201|minus.g3803.t1	S03_quant	41.688	11.8185	615.348	774
jgi|Phlrad1|132201|minus.g3803.t1	S04_quant	44.5192	12.543	629.227	774
jgi|Phlrad1|132201|minus.g3803.t1	S05_quant	51.2967	14.5525	611.348	774
jgi|Phlrad1|132201|minus.g3803.t1	S06_quant	53.1471	15.0829	614.627	774
jgi|Phlrad1|132202|minus.g3804.t1	S01_quant	27.5305	11.2285	435.701	579
jgi|Phlrad1|132202|minus.g3804.t1	S02_quant	35.9618	14.7945	427.491	579
jgi|Phlrad1|132202|minus.g3804.t1	S03_quant	30.1689	12.5145	420.549	579
jgi|Phlrad1|132202|minus.g3804.t1	S04_quant	37.398	15.2636	434.364	579
jgi|Phlrad1|132202|minus.g3804.t1	S05_quant	42.8501	17.8441	416.479	579
jgi|Phlrad1|132202|minus.g3804.t1	S06_quant	32.7964	13.6268	419.806	579
jgi|Phlrad1|132203|minus.g3805.t1	S01_quant	62.7264	5.98125	1863.61	2007
jgi|Phlrad1|132203|minus.g3805.t1	S02_quant	44.509	4.21877	1855.44	2007
jgi|Phlrad1|132203|minus.g3805.t1	S03_quant	18.146	1.71265	1848.35	2007
jgi|Phlrad1|132203|minus.g3805.t1	S04_quant	59.6881	5.6822	1862.23	2007
jgi|Phlrad1|132203|minus.g3805.t1	S05_quant	59.8824	5.63109	1844.35	2007
jgi|Phlrad1|132203|minus.g3805.t1	S06_quant	70.0659	6.61468	1847.63	2007
jgi|Phlrad1|132204|minus.g3805.t2	S01_quant	133.817	12.6987	1872.61	2016
jgi|Phlrad1|132204|minus.g3805.t2	S02_quant	183.624	17.3207	1864.44	2016
jgi|Phlrad1|132204|minus.g3805.t2	S03_quant	168.069	15.7858	1857.35	2016
jgi|Phlrad1|132204|minus.g3805.t2	S04_quant	142.087	13.4614	1871.23	2016
jgi|Phlrad1|132204|minus.g3805.t2	S05_quant	167.132	15.6401	1853.35	2016
jgi|Phlrad1|132204|minus.g3805.t2	S06_quant	114.017	10.7118	1856.63	2016
jgi|Phlrad1|132205|minus.g3806.t1	S01_quant	957.448	58.2756	2919.61	3063
jgi|Phlrad1|132205|minus.g3806.t1	S02_quant	987.826	59.6703	2911.44	3063
jgi|Phlrad1|132205|minus.g3806.t1	S03_quant	943.557	56.6751	2904.35	3063
jgi|Phlrad1|132205|minus.g3806.t1	S04_quant	1144.55	69.5309	2918.23	3063
jgi|Phlrad1|132205|minus.g3806.t1	S05_quant	1177.92	70.4373	2900.35	3063
jgi|Phlrad1|132205|minus.g3806.t1	S06_quant	1200.77	72.1333	2903.63	3063
jgi|Phlrad1|132206|minus.g3807.t1	S01_quant	12.2358	7.80967	278.416	420
jgi|Phlrad1|132206|minus.g3807.t1	S02_quant	24.7237	16.1094	269.911	420
jgi|Phlrad1|132206|minus.g3807.t1	S03_quant	23.927	15.7922	264.313	420
jgi|Phlrad1|132206|minus.g3807.t1	S04_quant	18.2641	11.6993	276.759	420
jgi|Phlrad1|132206|minus.g3807.t1	S05_quant	28.2628	18.9002	259.349	420
jgi|Phlrad1|132206|minus.g3807.t1	S06_quant	19.043	12.6096	263.421	420
jgi|Phlrad1|132207|plus.g3845.t1	S01_quant	37.7269	2.9868	2244.61	2388
jgi|Phlrad1|132207|plus.g3845.t1	S02_quant	37.0856	2.91631	2236.44	2388
jgi|Phlrad1|132207|plus.g3845.t1	S03_quant	35.3704	2.7678	2229.35	2388
jgi|Phlrad1|132207|plus.g3845.t1	S04_quant	33.9191	2.6806	2243.23	2388
jgi|Phlrad1|132207|plus.g3845.t1	S05_quant	41.0267	3.19746	2225.35	2388
jgi|Phlrad1|132207|plus.g3845.t1	S06_quant	30.6805	2.40127	2228.63	2388
jgi|Phlrad1|132208|minus.g3809.t1	S01_quant	552.649	173.939	564.609	708
jgi|Phlrad1|132208|minus.g3809.t1	S02_quant	441.656	139.589	556.44	708
jgi|Phlrad1|132208|minus.g3809.t1	S03_quant	436.928	138.737	549.403	708
jgi|Phlrad1|132208|minus.g3809.t1	S04_quant	551.403	173.559	563.227	708
jgi|Phlrad1|132208|minus.g3809.t1	S05_quant	556.14	176.867	545.348	708
jgi|Phlrad1|132208|minus.g3809.t1	S06_quant	421.063	133.871	548.627	708
jgi|Phlrad1|132209|minus.g3810.t1	S01_quant	7.13753	6.89334	183.998	321
jgi|Phlrad1|132209|minus.g3810.t1	S02_quant	11.2381	11.1815	176.758	321
jgi|Phlrad1|132209|minus.g3810.t1	S03_quant	10.4031	10.4933	172.951	321
jgi|Phlrad1|132209|minus.g3810.t1	S04_quant	6.95776	6.75793	182.523	321
jgi|Phlrad1|132209|minus.g3810.t1	S05_quant	7.29363	7.61314	166.156	321
jgi|Phlrad1|132209|minus.g3810.t1	S06_quant	5.28974	5.36455	171.995	321
jgi|Phlrad1|132210|plus.g3847.t1	S01_quant	199.851	17.9854	1974.61	2118
jgi|Phlrad1|132210|plus.g3847.t1	S02_quant	251.733	22.5136	1966.44	2118
jgi|Phlrad1|132210|plus.g3847.t1	S03_quant	261.117	23.2485	1959.35	2118
jgi|Phlrad1|132210|plus.g3847.t1	S04_quant	241.782	21.7224	1973.23	2118
jgi|Phlrad1|132210|plus.g3847.t1	S05_quant	242.513	21.5104	1955.35	2118
jgi|Phlrad1|132210|plus.g3847.t1	S06_quant	195.72	17.4301	1958.63	2118
jgi|Phlrad1|132211|minus.g3812.t1	S01_quant	95.8468	8.59953	1980.61	2124
jgi|Phlrad1|132211|minus.g3812.t1	S02_quant	106.762	9.51913	1972.44	2124
jgi|Phlrad1|132211|minus.g3812.t1	S03_quant	89.4663	7.94132	1965.35	2124
jgi|Phlrad1|132211|minus.g3812.t1	S04_quant	126.979	11.3736	1979.23	2124
jgi|Phlrad1|132211|minus.g3812.t1	S05_quant	112.14	9.9161	1961.35	2124
jgi|Phlrad1|132211|minus.g3812.t1	S06_quant	142.823	12.6804	1964.63	2124
jgi|Phlrad1|132212|plus.g3849.t2	S01_quant	0	0	2604.61	2748
jgi|Phlrad1|132212|plus.g3849.t2	S02_quant	2.0942e-07	1.41849e-08	2596.44	2748
jgi|Phlrad1|132212|plus.g3849.t2	S03_quant	28.298	1.9065	2589.35	2748
jgi|Phlrad1|132212|plus.g3849.t2	S04_quant	70.5429	4.80399	2603.23	2748
jgi|Phlrad1|132212|plus.g3849.t2	S05_quant	26.4437	1.77394	2585.35	2748
jgi|Phlrad1|132212|plus.g3849.t2	S06_quant	138.94	9.36212	2588.63	2748
jgi|Phlrad1|132213|plus.g3849.t1	S01_quant	422.134	29.0348	2583.61	2727
jgi|Phlrad1|132213|plus.g3849.t1	S02_quant	430.418	29.3917	2575.44	2727
jgi|Phlrad1|132213|plus.g3849.t1	S03_quant	396.147	26.9076	2568.35	2727
jgi|Phlrad1|132213|plus.g3849.t1	S04_quant	387.8	26.6241	2582.23	2727
jgi|Phlrad1|132213|plus.g3849.t1	S05_quant	377.441	25.5275	2564.35	2727
jgi|Phlrad1|132213|plus.g3849.t1	S06_quant	356.179	24.1965	2567.63	2727
jgi|Phlrad1|132214|minus.g3814.t1	S01_quant	1760.93	82.7706	3780.61	3924
jgi|Phlrad1|132214|minus.g3814.t1	S02_quant	1500.28	69.9417	3772.44	3924
jgi|Phlrad1|132214|minus.g3814.t1	S03_quant	1473.07	68.2483	3765.35	3924
jgi|Phlrad1|132214|minus.g3814.t1	S04_quant	1867.29	87.5931	3779.23	3924
jgi|Phlrad1|132214|minus.g3814.t1	S05_quant	1702.15	78.4858	3761.35	3924
jgi|Phlrad1|132214|minus.g3814.t1	S06_quant	1660.98	76.9588	3764.63	3924
jgi|Phlrad1|132215|plus.g3851.t1	S01_quant	160.085	23.287	1221.61	1365
jgi|Phlrad1|132215|plus.g3851.t1	S02_quant	166.323	24.1058	1213.44	1365
jgi|Phlrad1|132215|plus.g3851.t1	S03_quant	165.409	23.9198	1206.35	1365
jgi|Phlrad1|132215|plus.g3851.t1	S04_quant	179.162	26.0296	1220.23	1365
jgi|Phlrad1|132215|plus.g3851.t1	S05_quant	134.021	19.332	1202.35	1365
jgi|Phlrad1|132215|plus.g3851.t1	S06_quant	176.677	25.5614	1205.63	1365
jgi|Phlrad1|132216|minus.g3816.t1	S01_quant	69.336	12.7074	969.609	1113
jgi|Phlrad1|132216|minus.g3816.t1	S02_quant	77.5426	14.1842	961.44	1113
jgi|Phlrad1|132216|minus.g3816.t1	S03_quant	88.426	16.1639	954.348	1113
jgi|Phlrad1|132216|minus.g3816.t1	S04_quant	80.0143	14.6505	968.227	1113
jgi|Phlrad1|132216|minus.g3816.t1	S05_quant	72.9363	13.3106	950.348	1113
jgi|Phlrad1|132216|minus.g3816.t1	S06_quant	77.2301	14.1262	953.627	1113
jgi|Phlrad1|132217|minus.g3817.t1	S01_quant	1717.09	1030.71	296.041	438
jgi|Phlrad1|132217|minus.g3817.t1	S02_quant	1331.71	814.796	287.44	438
jgi|Phlrad1|132217|minus.g3817.t1	S03_quant	1318.07	816.763	281.523	438
jgi|Phlrad1|132217|minus.g3817.t1	S04_quant	1642.9	988.978	294.5	438
jgi|Phlrad1|132217|minus.g3817.t1	S05_quant	1527.1	956.696	276.841	438
jgi|Phlrad1|132217|minus.g3817.t1	S06_quant	1245.2	773.751	280.709	438
jgi|Phlrad1|132218|minus.g3818.t1	S01_quant	120.318	30.5614	699.609	843
jgi|Phlrad1|132218|minus.g3818.t1	S02_quant	42.7046	10.8619	691.44	843
jgi|Phlrad1|132218|minus.g3818.t1	S03_quant	78.0229	19.8892	684.348	843
jgi|Phlrad1|132218|minus.g3818.t1	S04_quant	109.585	27.8237	698.227	843
jgi|Phlrad1|132218|minus.g3818.t1	S05_quant	99.3758	25.3329	680.348	843
jgi|Phlrad1|132218|minus.g3818.t1	S06_quant	45.4917	11.6073	683.627	843
jgi|Phlrad1|132219|plus.g3855.t1	S01_quant	319.149	250.84	226.096	366
jgi|Phlrad1|132219|plus.g3855.t1	S02_quant	327.028	263.679	218.119	366
jgi|Phlrad1|132219|plus.g3855.t1	S03_quant	371.389	303.686	213.343	366
jgi|Phlrad1|132219|plus.g3855.t1	S04_quant	293.096	231.311	224.634	366
jgi|Phlrad1|132219|plus.g3855.t1	S05_quant	344.624	287.958	207.564	366
jgi|Phlrad1|132219|plus.g3855.t1	S06_quant	316.326	259.753	212.418	366
jgi|Phlrad1|132220|plus.g3856.t1	S01_quant	1642.65	568.341	513.609	657
jgi|Phlrad1|132220|plus.g3856.t1	S02_quant	1563.21	543.865	505.491	657
jgi|Phlrad1|132220|plus.g3856.t1	S03_quant	1953.69	683.756	498.458	657
jgi|Phlrad1|132220|plus.g3856.t1	S04_quant	1455.04	503.586	512.227	657
jgi|Phlrad1|132220|plus.g3856.t1	S05_quant	1573.6	552.075	494.348	657
jgi|Phlrad1|132220|plus.g3856.t1	S06_quant	1416.59	496.543	497.627	657
jgi|Phlrad1|132221|plus.g3857.t1	S01_quant	72.3949	9.27791	1386.61	1530
jgi|Phlrad1|132221|plus.g3857.t1	S02_quant	66.3046	8.45944	1378.44	1530
jgi|Phlrad1|132221|plus.g3857.t1	S03_quant	74.902	9.52837	1371.35	1530
jgi|Phlrad1|132221|plus.g3857.t1	S04_quant	62.6199	8.01405	1385.23	1530
jgi|Phlrad1|132221|plus.g3857.t1	S05_quant	68.3778	8.67306	1367.35	1530
jgi|Phlrad1|132221|plus.g3857.t1	S06_quant	68.7666	8.75134	1370.63	1530
jgi|Phlrad1|132222|minus.g3822.t1	S01_quant	399.702	60.6764	1170.61	1314
jgi|Phlrad1|132222|minus.g3822.t1	S02_quant	394.456	59.678	1162.44	1314
jgi|Phlrad1|132222|minus.g3822.t1	S03_quant	492.065	74.2988	1155.35	1314
jgi|Phlrad1|132222|minus.g3822.t1	S04_quant	444.427	67.3849	1169.23	1314
jgi|Phlrad1|132222|minus.g3822.t1	S05_quant	422.119	63.5865	1151.35	1314
jgi|Phlrad1|132222|minus.g3822.t1	S06_quant	457.033	69.0435	1154.63	1314
jgi|Phlrad1|132223|plus.g3859.t1	S01_quant	378.289	91.3846	735.609	879
jgi|Phlrad1|132223|plus.g3859.t1	S02_quant	379.847	91.8326	727.44	879
jgi|Phlrad1|132223|plus.g3859.t1	S03_quant	399.477	96.7437	720.348	879
jgi|Phlrad1|132223|plus.g3859.t1	S04_quant	330.494	79.7983	734.227	879
jgi|Phlrad1|132223|plus.g3859.t1	S05_quant	347.359	84.0991	716.348	879
jgi|Phlrad1|132223|plus.g3859.t1	S06_quant	361.818	87.6999	719.627	879
jgi|Phlrad1|132224|plus.g3860.t1	S01_quant	131.534	30.7713	759.609	903
jgi|Phlrad1|132224|plus.g3860.t1	S02_quant	139.352	32.6141	751.44	903
jgi|Phlrad1|132224|plus.g3860.t1	S03_quant	149.804	35.1091	744.348	903
jgi|Phlrad1|132224|plus.g3860.t1	S04_quant	86.1023	20.1315	758.227	903
jgi|Phlrad1|132224|plus.g3860.t1	S05_quant	92.9938	21.7848	740.348	903
jgi|Phlrad1|132224|plus.g3860.t1	S06_quant	82.5199	19.3562	743.627	903
jgi|Phlrad1|132225|minus.g3825.t1	S01_quant	71.3753	14.1305	897.609	1041
jgi|Phlrad1|132225|minus.g3825.t1	S02_quant	59.5617	11.7771	889.44	1041
jgi|Phlrad1|132225|minus.g3825.t1	S03_quant	69.7005	13.7806	882.348	1041
jgi|Phlrad1|132225|minus.g3825.t1	S04_quant	76.5354	15.1393	896.227	1041
jgi|Phlrad1|132225|minus.g3825.t1	S05_quant	72.9363	14.4017	878.348	1041
jgi|Phlrad1|132225|minus.g3825.t1	S06_quant	81.4619	16.1171	881.627	1041
jgi|Phlrad1|132226|plus.g3862.t1	S01_quant	58.1199	7.75029	1332.61	1476
jgi|Phlrad1|132226|plus.g3862.t1	S02_quant	39.3332	5.22292	1324.44	1476
jgi|Phlrad1|132226|plus.g3862.t1	S03_quant	46.8138	6.19934	1317.35	1476
jgi|Phlrad1|132226|plus.g3862.t1	S04_quant	28.7008	3.8221	1331.23	1476
jgi|Phlrad1|132226|plus.g3862.t1	S05_quant	41.0267	5.4178	1313.35	1476
jgi|Phlrad1|132226|plus.g3862.t1	S06_quant	25.3907	3.36379	1316.63	1476
jgi|Phlrad1|132227|minus.g3827.t1	S01_quant	275.486	47.6859	1026.61	1170
jgi|Phlrad1|132227|minus.g3827.t1	S02_quant	358.688	61.9394	1018.44	1170
jgi|Phlrad1|132227|minus.g3827.t1	S03_quant	452.533	78.0589	1011.35	1170
jgi|Phlrad1|132227|minus.g3827.t1	S04_quant	135.676	23.4609	1025.23	1170
jgi|Phlrad1|132227|minus.g3827.t1	S05_quant	172.312	29.6669	1007.35	1170
jgi|Phlrad1|132227|minus.g3827.t1	S06_quant	271.892	46.927	1010.63	1170
jgi|Phlrad1|132228|minus.g3828.t1	S01_quant	3.05894	2.63348	206.413	345
jgi|Phlrad1|132228|minus.g3828.t1	S02_quant	7.86665	6.96339	198.68	345
jgi|Phlrad1|132228|minus.g3828.t1	S03_quant	9.36275	8.41146	194.18	345
jgi|Phlrad1|132228|minus.g3828.t1	S04_quant	8.6972	7.5261	204.866	345
jgi|Phlrad1|132228|minus.g3828.t1	S05_quant	18.2341	16.8056	188.177	345
jgi|Phlrad1|132228|minus.g3828.t1	S06_quant	8.46358	7.6389	193.259	345
jgi|Phlrad1|132229|minus.g3829.t1	S01_quant	485.352	37.918	2274.61	2418
jgi|Phlrad1|132229|minus.g3829.t1	S02_quant	491.103	38.1079	2266.44	2418
jgi|Phlrad1|132229|minus.g3829.t1	S03_quant	606.498	46.8295	2259.35	2418
jgi|Phlrad1|132229|minus.g3829.t1	S04_quant	514.874	40.1531	2273.23	2418
jgi|Phlrad1|132229|minus.g3829.t1	S05_quant	479.556	36.8776	2255.35	2418
jgi|Phlrad1|132229|minus.g3829.t1	S06_quant	475.018	36.6845	2258.63	2418
jgi|Phlrad1|132230|minus.g3830.t1	S01_quant	349.739	26.0848	2382.61	2526
jgi|Phlrad1|132230|minus.g3830.t1	S02_quant	329.275	24.3884	2374.44	2526
jgi|Phlrad1|132230|minus.g3830.t1	S03_quant	369.309	27.2145	2367.35	2526
jgi|Phlrad1|132230|minus.g3830.t1	S04_quant	321.797	23.9575	2381.23	2526
jgi|Phlrad1|132230|minus.g3830.t1	S05_quant	334.595	24.5544	2363.35	2526
jgi|Phlrad1|132230|minus.g3830.t1	S06_quant	360.76	26.5892	2366.63	2526
jgi|Phlrad1|132231|plus.g3866.t2	S01_quant	569.085	70.1984	1440.61	1584
jgi|Phlrad1|132231|plus.g3866.t2	S02_quant	680.926	83.6006	1432.44	1584
jgi|Phlrad1|132231|plus.g3866.t2	S03_quant	730.575	89.4163	1425.35	1584
jgi|Phlrad1|132231|plus.g3866.t2	S04_quant	596.906	73.5255	1439.23	1584
jgi|Phlrad1|132231|plus.g3866.t2	S05_quant	683.056	83.3474	1421.35	1584
jgi|Phlrad1|132231|plus.g3866.t2	S06_quant	541.616	66.3142	1424.63	1584
jgi|Phlrad1|132232|plus.g3866.t1	S01_quant	1159.22	142.696	1443.61	1587
jgi|Phlrad1|132232|plus.g3866.t1	S02_quant	921.622	112.916	1435.44	1587
jgi|Phlrad1|132232|plus.g3866.t1	S03_quant	1174.23	143.414	1428.35	1587
jgi|Phlrad1|132232|plus.g3866.t1	S04_quant	979.027	120.343	1442.23	1587
jgi|Phlrad1|132232|plus.g3866.t1	S05_quant	1013.63	123.424	1424.35	1587
jgi|Phlrad1|132232|plus.g3866.t1	S06_quant	947.974	115.824	1427.63	1587
jgi|Phlrad1|132233|minus.g3832.t1	S01_quant	85.6503	15.9441	954.609	1098
jgi|Phlrad1|132233|minus.g3832.t1	S02_quant	113.504	21.0914	946.44	1098
jgi|Phlrad1|132233|minus.g3832.t1	S03_quant	122.756	22.7976	939.348	1098
jgi|Phlrad1|132233|minus.g3832.t1	S04_quant	105.236	19.5717	953.227	1098
jgi|Phlrad1|132233|minus.g3832.t1	S05_quant	96.6407	17.9194	935.348	1098
jgi|Phlrad1|132233|minus.g3832.t1	S06_quant	105.795	19.6602	938.627	1098
jgi|Phlrad1|132234|minus.g3833.t1	S01_quant	1163.42	53.331	3876.61	4020
jgi|Phlrad1|132234|minus.g3833.t1	S02_quant	1186.74	53.9517	3868.44	4020
jgi|Phlrad1|132234|minus.g3833.t1	S03_quant	1257.73	56.8226	3861.35	4020
jgi|Phlrad1|132234|minus.g3833.t1	S04_quant	1321.11	60.4368	3875.23	4020
jgi|Phlrad1|132234|minus.g3833.t1	S05_quant	1301.91	58.5369	3857.35	4020
jgi|Phlrad1|132234|minus.g3833.t1	S06_quant	1230.39	55.5907	3860.63	4020
jgi|Phlrad1|132235|plus.g3869.t1	S01_quant	237.578	106.402	396.783	540
jgi|Phlrad1|132235|plus.g3869.t1	S02_quant	267.466	121.067	388.533	540
jgi|Phlrad1|132235|plus.g3869.t1	S03_quant	289.205	132.091	381.949	540
jgi|Phlrad1|132235|plus.g3869.t1	S04_quant	229.606	102.944	395.405	540
jgi|Phlrad1|132235|plus.g3869.t1	S05_quant	205.133	94.2395	377.52	540
jgi|Phlrad1|132235|plus.g3869.t1	S06_quant	252.849	115.709	381.162	540
jgi|Phlrad1|132236|plus.g3870.t1	S01_quant	88.7093	48.4409	325.427	468
jgi|Phlrad1|132236|plus.g3870.t1	S02_quant	135.981	75.4366	317.016	468
jgi|Phlrad1|132236|plus.g3870.t1	S03_quant	224.706	126.117	310.824	468
jgi|Phlrad1|132236|plus.g3870.t1	S04_quant	100.888	55.1994	324.015	468
jgi|Phlrad1|132236|plus.g3870.t1	S05_quant	144.049	81.6216	306.085	468
jgi|Phlrad1|132236|plus.g3870.t1	S06_quant	143.881	80.9343	310.089	468
jgi|Phlrad1|132237|plus.g3871.t1	S01_quant	1185.85	126.975	1659.61	1803
jgi|Phlrad1|132237|plus.g3871.t1	S02_quant	1100.21	117.165	1651.44	1803
jgi|Phlrad1|132237|plus.g3871.t1	S03_quant	999.734	106.063	1644.35	1803
jgi|Phlrad1|132237|plus.g3871.t1	S04_quant	1093.24	116.878	1658.23	1803
jgi|Phlrad1|132237|plus.g3871.t1	S05_quant	1066.69	112.782	1640.35	1803
jgi|Phlrad1|132237|plus.g3871.t1	S06_quant	1007.17	106.884	1643.63	1803
jgi|Phlrad1|132238|plus.g3872.t1	S01_quant	1818.03	52.2209	6186.61	6330
jgi|Phlrad1|132238|plus.g3872.t1	S02_quant	1948.68	55.4687	6178.44	6330
jgi|Phlrad1|132238|plus.g3872.t1	S03_quant	1834.06	51.8449	6171.35	6330
jgi|Phlrad1|132238|plus.g3872.t1	S04_quant	2198.65	63.0176	6185.23	6330
jgi|Phlrad1|132238|plus.g3872.t1	S05_quant	2140.68	60.1991	6167.35	6330
jgi|Phlrad1|132238|plus.g3872.t1	S06_quant	2104.26	59.4821	6170.63	6330
jgi|Phlrad1|132239|minus.g3838.t1	S01_quant	372.171	25.48	2595.61	2739
jgi|Phlrad1|132239|minus.g3838.t1	S02_quant	438.285	29.7901	2587.44	2739
jgi|Phlrad1|132239|minus.g3838.t1	S03_quant	409.88	27.711	2580.35	2739
jgi|Phlrad1|132239|minus.g3838.t1	S04_quant	431.381	29.4791	2594.23	2739
jgi|Phlrad1|132239|minus.g3838.t1	S05_quant	409.355	27.557	2576.35	2739
jgi|Phlrad1|132239|minus.g3838.t1	S06_quant	482.424	32.6203	2579.63	2739
jgi|Phlrad1|132240|plus.g3874.t1	S01_quant	41.8055	6.58243	1128.61	1272
jgi|Phlrad1|132240|plus.g3874.t1	S02_quant	29.219	4.5863	1120.44	1272
jgi|Phlrad1|132240|plus.g3874.t1	S03_quant	60.3377	9.45433	1113.35	1272
jgi|Phlrad1|132240|plus.g3874.t1	S04_quant	23.4824	3.69312	1127.23	1272
jgi|Phlrad1|132240|plus.g3874.t1	S05_quant	47.4086	7.41184	1109.35	1272
jgi|Phlrad1|132240|plus.g3874.t1	S06_quant	25.3907	3.98054	1112.63	1272
jgi|Phlrad1|132241|plus.g3875.t1	S01_quant	293.658	40.6226	1284.61	1428
jgi|Phlrad1|132241|plus.g3875.t1	S02_quant	296.685	40.8772	1276.44	1428
jgi|Phlrad1|132241|plus.g3875.t1	S03_quant	362.026	49.7545	1269.35	1428
jgi|Phlrad1|132241|plus.g3875.t1	S04_quant	259.177	35.8058	1283.23	1428
jgi|Phlrad1|132241|plus.g3875.t1	S05_quant	306.333	41.9875	1265.35	1428
jgi|Phlrad1|132241|plus.g3875.t1	S06_quant	302.573	41.6018	1268.63	1428
jgi|Phlrad1|132242|plus.g3876.t1	S01_quant	1534.57	260.305	1047.61	1191
jgi|Phlrad1|132242|plus.g3876.t1	S02_quant	1030.53	174.36	1039.44	1191
jgi|Phlrad1|132242|plus.g3876.t1	S03_quant	965.404	163.138	1032.35	1191
jgi|Phlrad1|132242|plus.g3876.t1	S04_quant	1379.38	233.732	1046.23	1191
jgi|Phlrad1|132242|plus.g3876.t1	S05_quant	1177.01	198.507	1028.35	1191
jgi|Phlrad1|132242|plus.g3876.t1	S06_quant	1023.03	172.975	1031.63	1191
jgi|Phlrad1|132243|minus.g3842.t1	S01_quant	101.965	17.3457	1044.61	1188
jgi|Phlrad1|132243|minus.g3842.t1	S02_quant	135.981	23.0738	1036.44	1188
jgi|Phlrad1|132243|minus.g3842.t1	S03_quant	133.159	22.5674	1029.35	1188
jgi|Phlrad1|132243|minus.g3842.t1	S04_quant	96.539	16.4053	1043.23	1188
jgi|Phlrad1|132243|minus.g3842.t1	S05_quant	80.23	13.5707	1025.35	1188
jgi|Phlrad1|132243|minus.g3842.t1	S06_quant	89.9255	15.249	1028.63	1188
jgi|Phlrad1|132244|plus.g3878.t1	S01_quant	573.042	42.7395	2382.61	2526
jgi|Phlrad1|132244|plus.g3878.t1	S02_quant	541.675	40.1202	2374.44	2526
jgi|Phlrad1|132244|plus.g3878.t1	S03_quant	639.788	47.1462	2367.35	2526
jgi|Phlrad1|132244|plus.g3878.t1	S04_quant	608.804	45.325	2381.23	2526
jgi|Phlrad1|132244|plus.g3878.t1	S05_quant	588.961	43.221	2363.35	2526
jgi|Phlrad1|132244|plus.g3878.t1	S06_quant	564.944	41.6382	2366.63	2526
jgi|Phlrad1|132245|minus.g3844.t1	S01_quant	245.735	31.9769	1365.61	1509
jgi|Phlrad1|132245|minus.g3844.t1	S02_quant	240.495	31.1581	1357.44	1509
jgi|Phlrad1|132245|minus.g3844.t1	S03_quant	288.165	37.2278	1350.35	1509
jgi|Phlrad1|132245|minus.g3844.t1	S04_quant	261.786	34.0189	1364.23	1509
jgi|Phlrad1|132245|minus.g3844.t1	S05_quant	247.984	31.9449	1346.35	1509
jgi|Phlrad1|132245|minus.g3844.t1	S06_quant	281.414	36.3704	1349.63	1509
jgi|Phlrad1|132246|minus.g3845.t1	S01_quant	95.8468	10.769	1581.61	1725
jgi|Phlrad1|132246|minus.g3845.t1	S02_quant	91.0283	10.1745	1573.44	1725
jgi|Phlrad1|132246|minus.g3845.t1	S03_quant	80.1035	8.92147	1566.35	1725
jgi|Phlrad1|132246|minus.g3845.t1	S04_quant	105.236	11.8061	1580.23	1725
jgi|Phlrad1|132246|minus.g3845.t1	S05_quant	95.729	10.6268	1562.35	1725
jgi|Phlrad1|132246|minus.g3845.t1	S06_quant	95.2152	10.608	1565.63	1725
jgi|Phlrad1|132247|minus.g3846.t1	S01_quant	40.2507	46.4458	154.001	288
jgi|Phlrad1|132247|minus.g3846.t1	S02_quant	29.5753	35.2152	147.701	288
jgi|Phlrad1|132247|minus.g3846.t1	S03_quant	20.095	24.2284	144.689	288
jgi|Phlrad1|132247|minus.g3846.t1	S04_quant	37.5177	43.4486	153.081	288
jgi|Phlrad1|132247|minus.g3846.t1	S05_quant	27.5186	34.611	137.895	288
jgi|Phlrad1|132247|minus.g3846.t1	S06_quant	24.0405	29.0639	144.28	288
jgi|Phlrad1|132248|plus.g3880.t1	S01_quant	8.69237	16.5264	93.4663	213
jgi|Phlrad1|132248|plus.g3880.t1	S02_quant	19.8722	39.0996	89.3839	213
jgi|Phlrad1|132248|plus.g3880.t1	S03_quant	14.2351	28.0675	88.4765	213
jgi|Phlrad1|132248|plus.g3880.t1	S04_quant	6.83799	13.183	91.9548	213
jgi|Phlrad1|132248|plus.g3880.t1	S05_quant	13.5081	28.7888	81.3781	213
jgi|Phlrad1|132248|plus.g3880.t1	S06_quant	10.8717	21.5185	88.1258	213
jgi|Phlrad1|132249|plus.g3881.t1	S01_quant	266.128	28.861	1638.61	1782
jgi|Phlrad1|132249|plus.g3881.t1	S02_quant	232.628	25.0924	1630.44	1782
jgi|Phlrad1|132249|plus.g3881.t1	S03_quant	227.827	24.4831	1623.35	1782
jgi|Phlrad1|132249|plus.g3881.t1	S04_quant	246.131	26.6513	1637.23	1782
jgi|Phlrad1|132249|plus.g3881.t1	S05_quant	240.69	25.7783	1619.35	1782
jgi|Phlrad1|132249|plus.g3881.t1	S06_quant	265.545	28.5454	1622.63	1782
jgi|Phlrad1|132250|minus.g3848.t1	S01_quant	120.318	14.4504	1479.61	1623
jgi|Phlrad1|132250|minus.g3848.t1	S02_quant	114.628	13.7005	1471.44	1623
jgi|Phlrad1|132250|minus.g3848.t1	S03_quant	143.562	17.1029	1464.35	1623
jgi|Phlrad1|132250|minus.g3848.t1	S04_quant	141.764	17.0015	1478.23	1623
jgi|Phlrad1|132250|minus.g3848.t1	S05_quant	131.285	15.5918	1460.35	1623
jgi|Phlrad1|132250|minus.g3848.t1	S06_quant	131.185	15.6341	1463.63	1623
jgi|Phlrad1|132251|minus.g3849.t1	S01_quant	123.046	8.62344	2535.61	2679
jgi|Phlrad1|132251|minus.g3849.t1	S02_quant	93.4674	6.50377	2527.44	2679
jgi|Phlrad1|132251|minus.g3849.t1	S03_quant	103.922	7.19316	2520.35	2679
jgi|Phlrad1|132251|minus.g3849.t1	S04_quant	106.752	7.46781	2534.23	2679
jgi|Phlrad1|132251|minus.g3849.t1	S05_quant	53.4205	3.68191	2516.35	2679
jgi|Phlrad1|132251|minus.g3849.t1	S06_quant	139.645	9.66734	2519.63	2679
jgi|Phlrad1|132252|minus.g3849.t2	S01_quant	200.756	13.8082	2583.61	2727
jgi|Phlrad1|132252|minus.g3849.t2	S02_quant	239.4	16.3477	2575.44	2727
jgi|Phlrad1|132252|minus.g3849.t2	S03_quant	118.689	8.06176	2568.35	2727
jgi|Phlrad1|132252|minus.g3849.t2	S04_quant	171.034	11.7422	2582.23	2727
jgi|Phlrad1|132252|minus.g3849.t2	S05_quant	269.257	18.2107	2564.35	2727
jgi|Phlrad1|132252|minus.g3849.t2	S06_quant	209.754	14.2494	2567.63	2727
jgi|Phlrad1|132253|minus.g3849.t3	S01_quant	87.1157	5.98496	2586.61	2730
jgi|Phlrad1|132253|minus.g3849.t3	S02_quant	106.541	7.26686	2578.44	2730
jgi|Phlrad1|132253|minus.g3849.t3	S03_quant	185.189	12.564	2571.35	2730
jgi|Phlrad1|132253|minus.g3849.t3	S04_quant	84.0169	5.76141	2585.23	2730
jgi|Phlrad1|132253|minus.g3849.t3	S05_quant	70.2673	4.74684	2567.35	2730
jgi|Phlrad1|132253|minus.g3849.t3	S06_quant	73.779	5.00622	2570.63	2730
jgi|Phlrad1|132254|plus.g3884.t1	S01_quant	186.595	24.9387	1329.61	1473
jgi|Phlrad1|132254|plus.g3884.t1	S02_quant	223.637	29.7634	1321.44	1473
jgi|Phlrad1|132254|plus.g3884.t1	S03_quant	236.149	31.3436	1314.35	1473
jgi|Phlrad1|132254|plus.g3884.t1	S04_quant	173.944	23.2166	1328.23	1473
jgi|Phlrad1|132254|plus.g3884.t1	S05_quant	181.429	24.0136	1310.35	1473
jgi|Phlrad1|132254|plus.g3884.t1	S06_quant	183.025	24.3027	1313.63	1473
jgi|Phlrad1|132255|minus.g3851.t1	S01_quant	105.024	103.016	181.167	318
jgi|Phlrad1|132255|minus.g3851.t1	S02_quant	110.133	111.308	174.011	318
jgi|Phlrad1|132255|minus.g3851.t1	S03_quant	121.716	124.648	170.346	318
jgi|Phlrad1|132255|minus.g3851.t1	S04_quant	46.9649	46.3305	179.708	318
jgi|Phlrad1|132255|minus.g3851.t1	S05_quant	86.6119	91.8476	163.548	318
jgi|Phlrad1|132255|minus.g3851.t1	S06_quant	66.6507	68.605	169.459	318
jgi|Phlrad1|132256|minus.g3852.t1	S01_quant	549.59	28.5016	3426.61	3570
jgi|Phlrad1|132256|minus.g3852.t1	S02_quant	545.046	28.0409	3418.44	3570
jgi|Phlrad1|132256|minus.g3852.t1	S03_quant	543.04	27.7701	3411.35	3570
jgi|Phlrad1|132256|minus.g3852.t1	S04_quant	562.709	29.1243	3425.23	3570
jgi|Phlrad1|132256|minus.g3852.t1	S05_quant	577.109	29.375	3407.35	3570
jgi|Phlrad1|132256|minus.g3852.t1	S06_quant	599.856	30.6782	3410.63	3570
jgi|Phlrad1|132257|plus.g3886.t1	S01_quant	252.872	75.1936	597.609	741
jgi|Phlrad1|132257|plus.g3886.t1	S02_quant	239.371	71.4196	589.44	741
jgi|Phlrad1|132257|plus.g3886.t1	S03_quant	259.036	77.598	582.348	741
jgi|Phlrad1|132257|plus.g3886.t1	S04_quant	255.698	76.0285	596.227	741
jgi|Phlrad1|132257|plus.g3886.t1	S05_quant	233.396	69.9908	578.348	741
jgi|Phlrad1|132257|plus.g3886.t1	S06_quant	254.965	76.4633	581.627	741
jgi|Phlrad1|132258|plus.g3887.t1	S01_quant	21.4126	2.0617	1845.61	1989
jgi|Phlrad1|132258|plus.g3887.t1	S02_quant	11.2381	1.07563	1837.44	1989
jgi|Phlrad1|132258|plus.g3887.t1	S03_quant	16.6449	1.58643	1830.35	1989
jgi|Phlrad1|132258|plus.g3887.t1	S04_quant	26.9613	2.59172	1844.23	1989
jgi|Phlrad1|132258|plus.g3887.t1	S05_quant	22.7926	2.16445	1826.35	1989
jgi|Phlrad1|132258|plus.g3887.t1	S06_quant	29.6225	2.82407	1829.63	1989
jgi|Phlrad1|132259|plus.g3888.t1	S01_quant	116.24	73.4228	281.332	423
jgi|Phlrad1|132259|plus.g3888.t1	S02_quant	103.39	66.6592	272.775	423
jgi|Phlrad1|132259|plus.g3888.t1	S03_quant	174.771	114.171	267.046	423
jgi|Phlrad1|132259|plus.g3888.t1	S04_quant	57.4015	36.3821	279.703	423
jgi|Phlrad1|132259|plus.g3888.t1	S05_quant	103.934	68.7435	262.219	423
jgi|Phlrad1|132259|plus.g3888.t1	S06_quant	124.838	81.7486	266.368	423
jgi|Phlrad1|132260|minus.g3855.t1	S01_quant	1759.91	137.131	2280.61	2424
jgi|Phlrad1|132260|minus.g3855.t1	S02_quant	1210.34	93.67	2272.44	2424
jgi|Phlrad1|132260|minus.g3855.t1	S03_quant	945.638	72.822	2265.35	2424
jgi|Phlrad1|132260|minus.g3855.t1	S04_quant	1925.56	149.772	2279.23	2424
jgi|Phlrad1|132260|minus.g3855.t1	S05_quant	1808.82	138.728	2261.35	2424
jgi|Phlrad1|132260|minus.g3855.t1	S06_quant	1815.44	139.83	2264.63	2424
jgi|Phlrad1|132261|minus.g3856.t1	S01_quant	124.397	26.6782	828.609	972
jgi|Phlrad1|132261|minus.g3856.t1	S02_quant	109.009	23.367	820.44	972
jgi|Phlrad1|132261|minus.g3856.t1	S03_quant	88.426	18.966	813.348	972
jgi|Phlrad1|132261|minus.g3856.t1	S04_quant	101.757	21.8073	827.227	972
jgi|Phlrad1|132261|minus.g3856.t1	S05_quant	99.3758	21.2952	809.348	972
jgi|Phlrad1|132261|minus.g3856.t1	S06_quant	86.7517	18.621	812.627	972
jgi|Phlrad1|132262|minus.g3857.t1	S01_quant	70.1248	29.8333	417.701	561
jgi|Phlrad1|132262|minus.g3857.t1	S02_quant	23.0676	9.90603	409.533	561
jgi|Phlrad1|132262|minus.g3857.t1	S03_quant	24.1162	10.4468	402.713	561
jgi|Phlrad1|132262|minus.g3857.t1	S04_quant	60.4261	25.7284	416.364	561
jgi|Phlrad1|132262|minus.g3857.t1	S05_quant	41.9384	18.2515	398.52	561
jgi|Phlrad1|132262|minus.g3857.t1	S06_quant	24.5679	10.663	401.888	561
jgi|Phlrad1|132263|minus.g3858.t1	S01_quant	195.46	31.8774	1089.61	1233
jgi|Phlrad1|132263|minus.g3858.t1	S02_quant	170.819	27.7791	1081.44	1233
jgi|Phlrad1|132263|minus.g3858.t1	S03_quant	112.353	18.2437	1074.35	1233
jgi|Phlrad1|132263|minus.g3858.t1	S04_quant	155.546	25.3396	1088.23	1233
jgi|Phlrad1|132263|minus.g3858.t1	S05_quant	141.539	22.9344	1070.35	1233
jgi|Phlrad1|132263|minus.g3858.t1	S06_quant	114.258	18.5631	1073.63	1233
jgi|Phlrad1|132264|minus.g3859.t1	S01_quant	129.125	14.591	1572.61	1716
jgi|Phlrad1|132264|minus.g3859.t1	S02_quant	129.448	14.552	1564.44	1716
jgi|Phlrad1|132264|minus.g3859.t1	S03_quant	86.0125	9.63493	1557.35	1716
jgi|Phlrad1|132264|minus.g3859.t1	S04_quant	99.3931	11.2145	1571.23	1716
jgi|Phlrad1|132264|minus.g3859.t1	S05_quant	113.535	12.6764	1553.35	1716
jgi|Phlrad1|132264|minus.g3859.t1	S06_quant	100.084	11.2149	1556.63	1716
jgi|Phlrad1|132265|minus.g3860.t1	S01_quant	1186.87	123.296	1710.61	1854
jgi|Phlrad1|132265|minus.g3860.t1	S02_quant	1231.69	127.238	1702.44	1854
jgi|Phlrad1|132265|minus.g3860.t1	S03_quant	1337.83	137.663	1695.35	1854
jgi|Phlrad1|132265|minus.g3860.t1	S04_quant	1369.81	142.076	1709.23	1854
jgi|Phlrad1|132265|minus.g3860.t1	S05_quant	1399.47	143.505	1691.35	1854
jgi|Phlrad1|132265|minus.g3860.t1	S06_quant	1440.92	148.314	1694.63	1854
jgi|Phlrad1|132266|plus.g3894.t1	S01_quant	710.694	103.129	1224.61	1368
jgi|Phlrad1|132266|plus.g3894.t1	S02_quant	723.731	104.634	1216.44	1368
jgi|Phlrad1|132266|plus.g3894.t1	S03_quant	752.141	108.498	1209.35	1368
jgi|Phlrad1|132266|plus.g3894.t1	S04_quant	849.717	123.148	1223.23	1368
jgi|Phlrad1|132266|plus.g3894.t1	S05_quant	707.483	101.798	1205.35	1368
jgi|Phlrad1|132266|plus.g3894.t1	S06_quant	831.547	120.008	1208.63	1368
jgi|Phlrad1|132267|plus.g3895.t1	S01_quant	5.09823	1.94559	465.655	609
jgi|Phlrad1|132267|plus.g3895.t1	S02_quant	8.99045	3.45608	457.491	609
jgi|Phlrad1|132267|plus.g3895.t1	S03_quant	2.08061	0.805682	450.505	609
jgi|Phlrad1|132267|plus.g3895.t1	S04_quant	2.60916	0.996294	464.274	609
jgi|Phlrad1|132267|plus.g3895.t1	S05_quant	3.64682	1.41702	446.348	609
jgi|Phlrad1|132267|plus.g3895.t1	S06_quant	3.17384	1.23101	449.719	609
jgi|Phlrad1|132268|plus.g3896.t1	S01_quant	6.11788	9.9846	108.885	234
jgi|Phlrad1|132268|plus.g3896.t1	S02_quant	3.37142	5.68305	104.332	234
jgi|Phlrad1|132268|plus.g3896.t1	S03_quant	8.32245	14.0556	103.294	234
jgi|Phlrad1|132268|plus.g3896.t1	S04_quant	3.47888	5.72862	107.659	234
jgi|Phlrad1|132268|plus.g3896.t1	S05_quant	3.64682	6.60032	95.8264	234
jgi|Phlrad1|132268|plus.g3896.t1	S06_quant	4.23179	7.20856	102.398	234
jgi|Phlrad1|132269|plus.g3897.t1	S01_quant	13.2554	4.69596	501.608	645
jgi|Phlrad1|132269|plus.g3897.t1	S02_quant	16.8571	6.00743	493.491	645
jgi|Phlrad1|132269|plus.g3897.t1	S03_quant	14.5643	5.22296	486.458	645
jgi|Phlrad1|132269|plus.g3897.t1	S04_quant	9.56692	3.39052	500.227	645
jgi|Phlrad1|132269|plus.g3897.t1	S05_quant	8.20534	2.95034	482.348	645
jgi|Phlrad1|132269|plus.g3897.t1	S06_quant	13.7533	4.93993	485.627	645
jgi|Phlrad1|132270|plus.g3898.t1	S01_quant	0	0	349.12	492
jgi|Phlrad1|132270|plus.g3898.t1	S02_quant	1.12381	0.579899	340.82	492
jgi|Phlrad1|132270|plus.g3898.t1	S03_quant	0	0	334.374	492
jgi|Phlrad1|132270|plus.g3898.t1	S04_quant	0	0	347.847	492
jgi|Phlrad1|132270|plus.g3898.t1	S05_quant	0	0	329.833	492
jgi|Phlrad1|132270|plus.g3898.t1	S06_quant	1.05795	0.553366	333.479	492
jgi|Phlrad1|132271|minus.g3864.t1	S01_quant	58.1199	7.33734	1407.61	1551
jgi|Phlrad1|132271|minus.g3864.t1	S02_quant	68.5522	8.61495	1399.44	1551
jgi|Phlrad1|132271|minus.g3864.t1	S03_quant	82.1842	10.2971	1392.35	1551
jgi|Phlrad1|132271|minus.g3864.t1	S04_quant	79.1445	9.97761	1406.23	1551
jgi|Phlrad1|132271|minus.g3864.t1	S05_quant	84.7885	10.5919	1388.35	1551
jgi|Phlrad1|132271|minus.g3864.t1	S06_quant	78.2881	9.81272	1391.63	1551
jgi|Phlrad1|132272|plus.g3900.t1	S01_quant	409.898	24.1065	3021.61	3165
jgi|Phlrad1|132272|plus.g3900.t1	S02_quant	488.856	28.5302	3013.44	3165
jgi|Phlrad1|132272|plus.g3900.t1	S03_quant	405.719	23.5429	3006.35	3165
jgi|Phlrad1|132272|plus.g3900.t1	S04_quant	391.374	22.9728	3020.23	3165
jgi|Phlrad1|132272|plus.g3900.t1	S05_quant	379.269	21.909	3002.35	3165
jgi|Phlrad1|132272|plus.g3900.t1	S06_quant	396.73	23.0238	3005.63	3165
jgi|Phlrad1|132273|plus.g3901.t1	S01_quant	128.476	18.0249	1266.61	1410
jgi|Phlrad1|132273|plus.g3901.t1	S02_quant	141.6	19.7886	1258.44	1410
jgi|Phlrad1|132273|plus.g3901.t1	S03_quant	140.441	19.579	1251.35	1410
jgi|Phlrad1|132273|plus.g3901.t1	S04_quant	135.676	19.0106	1265.23	1410
jgi|Phlrad1|132273|plus.g3901.t1	S05_quant	179.606	24.9729	1247.35	1410
jgi|Phlrad1|132273|plus.g3901.t1	S06_quant	163.982	22.871	1250.63	1410
jgi|Phlrad1|132274|minus.g3867.t1	S01_quant	65.2574	16.2277	714.609	858
jgi|Phlrad1|132274|minus.g3867.t1	S02_quant	85.4093	21.2626	706.44	858
jgi|Phlrad1|132274|minus.g3867.t1	S03_quant	64.499	16.0891	699.348	858
jgi|Phlrad1|132274|minus.g3867.t1	S04_quant	67.8382	16.8619	713.227	858
jgi|Phlrad1|132274|minus.g3867.t1	S05_quant	61.0842	15.2357	695.348	858
jgi|Phlrad1|132274|minus.g3867.t1	S06_quant	84.6358	21.1312	698.627	858
jgi|Phlrad1|132275|minus.g3868.t1	S01_quant	148.868	7.32889	3609.61	3753
jgi|Phlrad1|132275|minus.g3868.t1	S02_quant	148.342	7.24395	3601.44	3753
jgi|Phlrad1|132275|minus.g3868.t1	S03_quant	144.603	7.01824	3594.35	3753
jgi|Phlrad1|132275|minus.g3868.t1	S04_quant	143.504	7.05068	3608.23	3753
jgi|Phlrad1|132275|minus.g3868.t1	S05_quant	136.756	6.6061	3590.35	3753
jgi|Phlrad1|132275|minus.g3868.t1	S06_quant	154.46	7.49722	3593.63	3753
jgi|Phlrad1|132276|plus.g3903.t1	S01_quant	151.927	22.714	1188.61	1332
jgi|Phlrad1|132276|plus.g3903.t1	S02_quant	94.3997	14.0641	1180.44	1332
jgi|Phlrad1|132276|plus.g3903.t1	S03_quant	155.006	23.0459	1173.35	1332
jgi|Phlrad1|132276|plus.g3903.t1	S04_quant	174.814	26.1038	1187.23	1332
jgi|Phlrad1|132276|plus.g3903.t1	S05_quant	126.727	18.7958	1169.35	1332
jgi|Phlrad1|132276|plus.g3903.t1	S06_quant	147.055	21.8744	1172.63	1332
jgi|Phlrad1|132277|plus.g3904.t1	S01_quant	36.7073	12.6266	516.609	660
jgi|Phlrad1|132277|plus.g3904.t1	S02_quant	33.7142	11.6604	508.491	660
jgi|Phlrad1|132277|plus.g3904.t1	S03_quant	55.1362	19.1812	501.458	660
jgi|Phlrad1|132277|plus.g3904.t1	S04_quant	34.7888	11.9702	515.227	660
jgi|Phlrad1|132277|plus.g3904.t1	S05_quant	30.0862	10.4916	497.348	660
jgi|Phlrad1|132277|plus.g3904.t1	S06_quant	29.6225	10.3211	500.627	660
jgi|Phlrad1|132278|minus.g3871.t1	S01_quant	590.963	42.5234	2469.61	2613
jgi|Phlrad1|132278|minus.g3871.t1	S02_quant	679.865	48.5757	2461.44	2613
jgi|Phlrad1|132278|minus.g3871.t1	S03_quant	552.402	39.2638	2454.35	2613
jgi|Phlrad1|132278|minus.g3871.t1	S04_quant	636.118	45.6892	2468.23	2613
jgi|Phlrad1|132278|minus.g3871.t1	S05_quant	624.654	44.2128	2450.35	2613
jgi|Phlrad1|132278|minus.g3871.t1	S06_quant	648.346	46.0909	2453.63	2613
jgi|Phlrad1|132279|minus.g3871.t2	S01_quant	5.90933	0.811767	1293.61	1437
jgi|Phlrad1|132279|minus.g3871.t2	S02_quant	9.92711	1.35818	1285.44	1437
jgi|Phlrad1|132279|minus.g3871.t2	S03_quant	0	0	1278.35	1437
jgi|Phlrad1|132279|minus.g3871.t2	S04_quant	0	0	1292.23	1437
jgi|Phlrad1|132279|minus.g3871.t2	S05_quant	8.98037	1.2222	1274.35	1437
jgi|Phlrad1|132279|minus.g3871.t2	S06_quant	15.4473	2.10895	1277.63	1437
jgi|Phlrad1|132280|minus.g3872.t1	S01_quant	228.401	27.2106	1491.61	1635
jgi|Phlrad1|132280|minus.g3872.t1	S02_quant	234.876	27.8454	1483.44	1635
jgi|Phlrad1|132280|minus.g3872.t1	S03_quant	245.512	29.0106	1476.35	1635
jgi|Phlrad1|132280|minus.g3872.t1	S04_quant	236.564	28.1421	1490.23	1635
jgi|Phlrad1|132280|minus.g3872.t1	S05_quant	201.487	23.7341	1472.35	1635
jgi|Phlrad1|132280|minus.g3872.t1	S06_quant	217.937	25.7615	1475.63	1635
jgi|Phlrad1|132281|plus.g3907.t1	S01_quant	382.368	46.5842	1458.61	1602
jgi|Phlrad1|132281|plus.g3907.t1	S02_quant	376.475	45.6481	1450.44	1602
jgi|Phlrad1|132281|plus.g3907.t1	S03_quant	424.445	51.3006	1443.35	1602
jgi|Phlrad1|132281|plus.g3907.t1	S04_quant	382.677	46.555	1457.23	1602
jgi|Phlrad1|132281|plus.g3907.t1	S05_quant	413.914	49.8747	1439.35	1602
jgi|Phlrad1|132281|plus.g3907.t1	S06_quant	399.904	48.3524	1442.63	1602
jgi|Phlrad1|132282|minus.g3874.t1	S01_quant	5.09823	2.30047	393.822	537
jgi|Phlrad1|132282|minus.g3874.t1	S02_quant	2.24761	1.02529	385.533	537
jgi|Phlrad1|132282|minus.g3874.t1	S03_quant	5.20153	2.3943	378.987	537
jgi|Phlrad1|132282|minus.g3874.t1	S04_quant	0.86972	0.392883	392.444	537
jgi|Phlrad1|132282|minus.g3874.t1	S05_quant	6.38193	2.95509	374.557	537
jgi|Phlrad1|132282|minus.g3874.t1	S06_quant	2.11589	0.975862	378.2	537
jgi|Phlrad1|132283|minus.g3875.t1	S01_quant	92.7879	37.0782	444.701	588
jgi|Phlrad1|132283|minus.g3875.t1	S02_quant	88.7807	35.7708	436.491	588
jgi|Phlrad1|132283|minus.g3875.t1	S03_quant	125.877	51.1218	429.549	588
jgi|Phlrad1|132283|minus.g3875.t1	S04_quant	61.7501	24.6934	443.32	588
jgi|Phlrad1|132283|minus.g3875.t1	S05_quant	66.5544	27.1318	425.437	588
jgi|Phlrad1|132283|minus.g3875.t1	S06_quant	82.5199	33.5705	428.763	588
jgi|Phlrad1|132284|minus.g3876.t1	S01_quant	157.734	23.2882	1203.61	1347
jgi|Phlrad1|132284|minus.g3876.t1	S02_quant	149.471	21.9894	1195.44	1347
jgi|Phlrad1|132284|minus.g3876.t1	S03_quant	202.447	29.7194	1188.35	1347
jgi|Phlrad1|132284|minus.g3876.t1	S04_quant	133.398	19.6709	1202.23	1347
jgi|Phlrad1|132284|minus.g3876.t1	S05_quant	119.398	17.4845	1184.35	1347
jgi|Phlrad1|132284|minus.g3876.t1	S06_quant	131.942	19.3785	1187.63	1347
jgi|Phlrad1|132285|plus.g3910.t1	S01_quant	60.4703	12.5153	858.609	1002
jgi|Phlrad1|132285|plus.g3910.t1	S02_quant	38.2052	7.90068	850.44	1002
jgi|Phlrad1|132285|plus.g3910.t1	S03_quant	61.7908	12.7817	843.348	1002
jgi|Phlrad1|132285|plus.g3910.t1	S04_quant	60.5498	12.5221	857.227	1002
jgi|Phlrad1|132285|plus.g3910.t1	S05_quant	66.5898	13.7595	839.348	1002
jgi|Phlrad1|132285|plus.g3910.t1	S06_quant	77.5314	16.0494	842.627	1002
jgi|Phlrad1|132286|minus.g3877.t1	S01_quant	179.458	23.0486	1383.61	1527
jgi|Phlrad1|132286|minus.g3877.t1	S02_quant	161.828	20.6918	1375.44	1527
jgi|Phlrad1|132286|minus.g3877.t1	S03_quant	164.368	20.9553	1368.35	1527
jgi|Phlrad1|132286|minus.g3877.t1	S04_quant	169.595	21.7518	1382.23	1527
jgi|Phlrad1|132286|minus.g3877.t1	S05_quant	185.988	23.6426	1364.35	1527
jgi|Phlrad1|132286|minus.g3877.t1	S06_quant	152.344	19.4301	1367.63	1527
jgi|Phlrad1|132287|plus.g3912.t1	S01_quant	3088.51	100.288	5472.61	5616
jgi|Phlrad1|132287|plus.g3912.t1	S02_quant	2524.07	81.2347	5464.44	5616
jgi|Phlrad1|132287|plus.g3912.t1	S03_quant	2354.21	75.2552	5457.35	5616
jgi|Phlrad1|132287|plus.g3912.t1	S04_quant	3056.2	99.0279	5471.23	5616
jgi|Phlrad1|132287|plus.g3912.t1	S05_quant	2842.69	90.4072	5453.35	5616
jgi|Phlrad1|132287|plus.g3912.t1	S06_quant	2462.9	78.7298	5456.63	5616
jgi|Phlrad1|132288|plus.g3913.t1	S01_quant	34.668	31.1356	197.864	336
jgi|Phlrad1|132288|plus.g3913.t1	S02_quant	24.7237	22.8324	190.436	336
jgi|Phlrad1|132288|plus.g3913.t1	S03_quant	24.9673	23.3991	186.143	336
jgi|Phlrad1|132288|plus.g3913.t1	S04_quant	28.7008	25.8916	196.515	336
jgi|Phlrad1|132288|plus.g3913.t1	S05_quant	29.1745	28.1514	179.738	336
jgi|Phlrad1|132288|plus.g3913.t1	S06_quant	30.6805	28.9027	185.157	336
jgi|Phlrad1|132289|minus.g3879.t1	S01_quant	332.405	20.7873	2841.61	2985
jgi|Phlrad1|132289|minus.g3879.t1	S02_quant	316.913	19.6704	2833.44	2985
jgi|Phlrad1|132289|minus.g3879.t1	S03_quant	300.648	18.5569	2826.35	2985
jgi|Phlrad1|132289|minus.g3879.t1	S04_quant	361.804	22.583	2840.23	2985
jgi|Phlrad1|132289|minus.g3879.t1	S05_quant	356.476	21.9057	2822.35	2985
jgi|Phlrad1|132289|minus.g3879.t1	S06_quant	372.397	22.9884	2825.63	2985
jgi|Phlrad1|132290|minus.g3880.t1	S01_quant	67.2967	11.8922	1005.61	1149
jgi|Phlrad1|132290|minus.g3880.t1	S02_quant	57.3141	10.1056	997.44	1149
jgi|Phlrad1|132290|minus.g3880.t1	S03_quant	45.7735	8.06304	990.348	1149
jgi|Phlrad1|132290|minus.g3880.t1	S04_quant	52.1832	9.21213	1004.23	1149
jgi|Phlrad1|132290|minus.g3880.t1	S05_quant	70.2012	12.3439	986.348	1149
jgi|Phlrad1|132290|minus.g3880.t1	S06_quant	48.6656	8.57762	989.627	1149
jgi|Phlrad1|132291|plus.g3916.t1	S01_quant	528.177	53.4623	1755.61	1899
jgi|Phlrad1|132291|plus.g3916.t1	S02_quant	323.656	32.5737	1747.44	1899
jgi|Phlrad1|132291|plus.g3916.t1	S03_quant	410.921	41.1903	1740.35	1899
jgi|Phlrad1|132291|plus.g3916.t1	S04_quant	442.688	44.7376	1754.23	1899
jgi|Phlrad1|132291|plus.g3916.t1	S05_quant	417.561	41.708	1736.35	1899
jgi|Phlrad1|132291|plus.g3916.t1	S06_quant	367.108	36.809	1739.63	1899
jgi|Phlrad1|132292|plus.g3917.t1	S01_quant	42.8252	9.97915	762.609	906
jgi|Phlrad1|132292|plus.g3917.t1	S02_quant	32.5904	7.59715	754.44	906
jgi|Phlrad1|132292|plus.g3917.t1	S03_quant	55.1362	12.8702	747.348	906
jgi|Phlrad1|132292|plus.g3917.t1	S04_quant	37.398	8.70953	761.227	906
jgi|Phlrad1|132292|plus.g3917.t1	S05_quant	38.2916	8.93403	743.348	906
jgi|Phlrad1|132292|plus.g3917.t1	S06_quant	38.0861	8.89773	746.627	906
jgi|Phlrad1|132293|minus.g3883.t1	S01_quant	78.5128	10.6862	1305.61	1449
jgi|Phlrad1|132293|minus.g3883.t1	S02_quant	101.143	13.7098	1297.44	1449
jgi|Phlrad1|132293|minus.g3883.t1	S03_quant	79.0632	10.6891	1290.35	1449
jgi|Phlrad1|132293|minus.g3883.t1	S04_quant	85.2326	11.5855	1304.23	1449
jgi|Phlrad1|132293|minus.g3883.t1	S05_quant	94.8173	12.784	1286.35	1449
jgi|Phlrad1|132293|minus.g3883.t1	S06_quant	79.346	10.7319	1289.63	1449
jgi|Phlrad1|132294|plus.g3919.t1	S01_quant	151.927	43.6431	618.609	762
jgi|Phlrad1|132294|plus.g3919.t1	S02_quant	183.18	52.7742	610.44	762
jgi|Phlrad1|132294|plus.g3919.t1	S03_quant	144.603	41.8101	603.348	762
jgi|Phlrad1|132294|plus.g3919.t1	S04_quant	165.247	47.4623	617.227	762
jgi|Phlrad1|132294|plus.g3919.t1	S05_quant	136.756	39.5733	599.348	762
jgi|Phlrad1|132294|plus.g3919.t1	S06_quant	172.445	49.9137	602.627	762
jgi|Phlrad1|132295|minus.g3885.t1	S01_quant	359.935	29.9361	2136.61	2280
jgi|Phlrad1|132295|minus.g3885.t1	S02_quant	279.828	23.1215	2128.44	2280
jgi|Phlrad1|132295|minus.g3885.t1	S03_quant	280.883	23.0986	2121.35	2280
jgi|Phlrad1|132295|minus.g3885.t1	S04_quant	347.888	28.884	2135.23	2280
jgi|Phlrad1|132295|minus.g3885.t1	S05_quant	334.595	27.4072	2117.35	2280
jgi|Phlrad1|132295|minus.g3885.t1	S06_quant	298.341	24.5395	2120.63	2280
jgi|Phlrad1|132296|minus.g3886.t1	S01_quant	346.68	95.4235	645.609	789
jgi|Phlrad1|132296|minus.g3886.t1	S02_quant	304.552	84.0248	637.44	789
jgi|Phlrad1|132296|minus.g3886.t1	S03_quant	279.842	77.4472	630.348	789
jgi|Phlrad1|132296|minus.g3886.t1	S04_quant	309.62	85.2024	644.227	789
jgi|Phlrad1|132296|minus.g3886.t1	S05_quant	342.801	94.921	626.348	789
jgi|Phlrad1|132296|minus.g3886.t1	S06_quant	293.051	81.1852	629.627	789
jgi|Phlrad1|132297|plus.g3922.t1	S01_quant	5889.48	944.902	1107.61	1251
jgi|Phlrad1|132297|plus.g3922.t1	S02_quant	3847.91	615.516	1099.44	1251
jgi|Phlrad1|132297|plus.g3922.t1	S03_quant	3106.35	496.092	1092.35	1251
jgi|Phlrad1|132297|plus.g3922.t1	S04_quant	5831.47	934.534	1106.23	1251
jgi|Phlrad1|132297|plus.g3922.t1	S05_quant	6141.24	978.644	1088.35	1251
jgi|Phlrad1|132297|plus.g3922.t1	S06_quant	4124.94	659.112	1091.63	1251
jgi|Phlrad1|132298|plus.g3923.t1	S01_quant	318.13	29.5734	1911.61	2055
jgi|Phlrad1|132298|plus.g3923.t1	S02_quant	359.618	33.2268	1903.44	2055
jgi|Phlrad1|132298|plus.g3923.t1	S03_quant	291.286	26.7962	1896.35	2055
jgi|Phlrad1|132298|plus.g3923.t1	S04_quant	312.23	28.9768	1910.23	2055
jgi|Phlrad1|132298|plus.g3923.t1	S05_quant	283.54	25.9866	1892.35	2055
jgi|Phlrad1|132298|plus.g3923.t1	S06_quant	302.573	27.8416	1895.63	2055
jgi|Phlrad1|132299|plus.g3924.t1	S01_quant	730.067	54.3825	2385.61	2529
jgi|Phlrad1|132299|plus.g3924.t1	S02_quant	712.493	52.7056	2377.44	2529
jgi|Phlrad1|132299|plus.g3924.t1	S03_quant	688.682	50.685	2370.35	2529
jgi|Phlrad1|132299|plus.g3924.t1	S04_quant	785.357	58.3957	2384.23	2529
jgi|Phlrad1|132299|plus.g3924.t1	S05_quant	758.538	55.5949	2366.35	2529
jgi|Phlrad1|132299|plus.g3924.t1	S06_quant	711.998	52.4102	2369.63	2529
jgi|Phlrad1|132300|plus.g3925.t1	S01_quant	271.226	127.218	378.861	522
jgi|Phlrad1|132300|plus.g3925.t1	S02_quant	284.323	134.908	370.647	522
jgi|Phlrad1|132300|plus.g3925.t1	S03_quant	297.527	142.584	364.024	522
jgi|Phlrad1|132300|plus.g3925.t1	S04_quant	274.832	129.032	377.599	522
jgi|Phlrad1|132300|plus.g3925.t1	S05_quant	252.542	121.791	359.63	522
jgi|Phlrad1|132300|plus.g3925.t1	S06_quant	285.646	137.168	363.237	522
jgi|Phlrad1|132301|minus.g3891.t1	S01_quant	70.3556	9.77816	1278.61	1422
jgi|Phlrad1|132301|minus.g3891.t1	S02_quant	74.1712	10.2676	1270.44	1422
jgi|Phlrad1|132301|minus.g3891.t1	S03_quant	73.8617	10.1993	1263.35	1422
jgi|Phlrad1|132301|minus.g3891.t1	S04_quant	70.4473	9.77817	1277.23	1422
jgi|Phlrad1|132301|minus.g3891.t1	S05_quant	91.1704	12.5558	1259.35	1422
jgi|Phlrad1|132301|minus.g3891.t1	S06_quant	97.3311	13.446	1262.63	1422
jgi|Phlrad1|132302|plus.g3927.t1	S01_quant	84.6307	11.9018	1263.61	1407
jgi|Phlrad1|132302|plus.g3927.t1	S02_quant	88.7807	12.4368	1255.44	1407
jgi|Phlrad1|132302|plus.g3927.t1	S03_quant	97.7887	13.6655	1248.35	1407
jgi|Phlrad1|132302|plus.g3927.t1	S04_quant	107.845	15.1469	1262.23	1407
jgi|Phlrad1|132302|plus.g3927.t1	S05_quant	104.846	14.6132	1244.35	1407
jgi|Phlrad1|132302|plus.g3927.t1	S06_quant	88.8676	12.4244	1247.63	1407
jgi|Phlrad1|132303|minus.g3893.t1	S01_quant	539.393	65.3117	1467.61	1611
jgi|Phlrad1|132303|minus.g3893.t1	S02_quant	489.98	59.0443	1459.44	1611
jgi|Phlrad1|132303|minus.g3893.t1	S03_quant	474.379	56.9807	1452.35	1611
jgi|Phlrad1|132303|minus.g3893.t1	S04_quant	524.441	63.4099	1466.23	1611
jgi|Phlrad1|132303|minus.g3893.t1	S05_quant	529.7	63.4298	1448.35	1611
jgi|Phlrad1|132303|minus.g3893.t1	S06_quant	487.714	58.6039	1451.63	1611
jgi|Phlrad1|132304|minus.g3894.t1	S01_quant	78.5128	15.8077	882.609	1026
jgi|Phlrad1|132304|minus.g3894.t1	S02_quant	77.5426	15.5954	874.44	1026
jgi|Phlrad1|132304|minus.g3894.t1	S03_quant	69.7005	14.0189	867.348	1026
jgi|Phlrad1|132304|minus.g3894.t1	S04_quant	86.972	17.4966	881.227	1026
jgi|Phlrad1|132304|minus.g3894.t1	S05_quant	90.2587	18.1317	863.348	1026
jgi|Phlrad1|132304|minus.g3894.t1	S06_quant	90.9835	18.3125	866.627	1026
jgi|Phlrad1|132305|plus.g3930.t1	S01_quant	36.7073	14.6683	444.701	588
jgi|Phlrad1|132305|plus.g3930.t1	S02_quant	51.6951	20.8286	436.491	588
jgi|Phlrad1|132305|plus.g3930.t1	S03_quant	42.6525	17.3223	429.549	588
jgi|Phlrad1|132305|plus.g3930.t1	S04_quant	43.486	17.3897	443.32	588
jgi|Phlrad1|132305|plus.g3930.t1	S05_quant	42.8501	17.4684	425.437	588
jgi|Phlrad1|132305|plus.g3930.t1	S06_quant	44.4338	18.0764	428.763	588
jgi|Phlrad1|132306|minus.g3896.t1	S01_quant	201.89	74.1851	483.608	627
jgi|Phlrad1|132306|minus.g3896.t1	S02_quant	178.685	66.0894	475.491	627
jgi|Phlrad1|132306|minus.g3896.t1	S03_quant	231.988	86.3821	468.505	627
jgi|Phlrad1|132306|minus.g3896.t1	S04_quant	193.948	71.3007	482.227	627
jgi|Phlrad1|132306|minus.g3896.t1	S05_quant	190.546	71.1693	464.348	627
jgi|Phlrad1|132306|minus.g3896.t1	S06_quant	201.01	74.9781	467.627	627
jgi|Phlrad1|132307|plus.g3932.t1	S01_quant	231.46	26.8725	1530.61	1674
jgi|Phlrad1|132307|plus.g3932.t1	S02_quant	198.914	22.9779	1522.44	1674
jgi|Phlrad1|132307|plus.g3932.t1	S03_quant	182.054	20.9585	1515.35	1674
jgi|Phlrad1|132307|plus.g3932.t1	S04_quant	193.948	22.484	1529.23	1674
jgi|Phlrad1|132307|plus.g3932.t1	S05_quant	204.222	23.4355	1511.35	1674
jgi|Phlrad1|132307|plus.g3932.t1	S06_quant	196.778	22.6615	1514.63	1674
jgi|Phlrad1|132308|minus.g3898.t1	S01_quant	279.383	84.7791	585.609	729
jgi|Phlrad1|132308|minus.g3898.t1	S02_quant	239.371	72.9038	577.44	729
jgi|Phlrad1|132308|minus.g3898.t1	S03_quant	256.956	78.5943	570.348	729
jgi|Phlrad1|132308|minus.g3898.t1	S04_quant	244.391	74.1592	584.227	729
jgi|Phlrad1|132308|minus.g3898.t1	S05_quant	239.778	73.4281	566.348	729
jgi|Phlrad1|132308|minus.g3898.t1	S06_quant	203.126	62.2001	569.627	729
jgi|Phlrad1|132309|plus.g3934.t1	S01_quant	0	0	1872.61	2016
jgi|Phlrad1|132309|plus.g3934.t1	S02_quant	0	0	1864.44	2016
jgi|Phlrad1|132309|plus.g3934.t1	S03_quant	0	0	1857.35	2016
jgi|Phlrad1|132309|plus.g3934.t1	S04_quant	0	0	1871.23	2016
jgi|Phlrad1|132309|plus.g3934.t1	S05_quant	0	0	1853.35	2016
jgi|Phlrad1|132309|plus.g3934.t1	S06_quant	0	0	1856.63	2016
jgi|Phlrad1|132310|plus.g3935.t1	S01_quant	0	0	1359.61	1503
jgi|Phlrad1|132310|plus.g3935.t1	S02_quant	0	0	1351.44	1503
jgi|Phlrad1|132310|plus.g3935.t1	S03_quant	0	0	1344.35	1503
jgi|Phlrad1|132310|plus.g3935.t1	S04_quant	0	0	1358.23	1503
jgi|Phlrad1|132310|plus.g3935.t1	S05_quant	0	0	1340.35	1503
jgi|Phlrad1|132310|plus.g3935.t1	S06_quant	0	0	1343.63	1503
jgi|Phlrad1|132311|minus.g3901.t1	S01_quant	0	0	675.609	819
jgi|Phlrad1|132311|minus.g3901.t1	S02_quant	0	0	667.44	819
jgi|Phlrad1|132311|minus.g3901.t1	S03_quant	0	0	660.348	819
jgi|Phlrad1|132311|minus.g3901.t1	S04_quant	0	0	674.227	819
jgi|Phlrad1|132311|minus.g3901.t1	S05_quant	0	0	656.348	819
jgi|Phlrad1|132311|minus.g3901.t1	S06_quant	0	0	659.627	819
jgi|Phlrad1|132312|plus.g3937.t1	S01_quant	0	0	1155.61	1299
jgi|Phlrad1|132312|plus.g3937.t1	S02_quant	0	0	1147.44	1299
jgi|Phlrad1|132312|plus.g3937.t1	S03_quant	0	0	1140.35	1299
jgi|Phlrad1|132312|plus.g3937.t1	S04_quant	0	0	1154.23	1299
jgi|Phlrad1|132312|plus.g3937.t1	S05_quant	0	0	1136.35	1299
jgi|Phlrad1|132312|plus.g3937.t1	S06_quant	0	0	1139.63	1299
jgi|Phlrad1|132313|minus.g3903.t1	S01_quant	0	0	272.554	414
jgi|Phlrad1|132313|minus.g3903.t1	S02_quant	0	0	264.099	414
jgi|Phlrad1|132313|minus.g3903.t1	S03_quant	0	0	258.577	414
jgi|Phlrad1|132313|minus.g3903.t1	S04_quant	0	0	270.814	414
jgi|Phlrad1|132313|minus.g3903.t1	S05_quant	0	0	253.582	414
jgi|Phlrad1|132313|minus.g3903.t1	S06_quant	0	0	257.632	414
jgi|Phlrad1|132314|minus.g3904.t1	S01_quant	0	0	243.225	384
jgi|Phlrad1|132314|minus.g3904.t1	S02_quant	0	0	235.096	384
jgi|Phlrad1|132314|minus.g3904.t1	S03_quant	0	0	229.998	384
jgi|Phlrad1|132314|minus.g3904.t1	S04_quant	0	0	241.81	384
jgi|Phlrad1|132314|minus.g3904.t1	S05_quant	0	0	224.561	384
jgi|Phlrad1|132314|minus.g3904.t1	S06_quant	0	0	229.046	384
jgi|Phlrad1|132315|plus.g3940.t1	S01_quant	1.02022	0.418987	432.701	576
jgi|Phlrad1|132315|plus.g3940.t1	S02_quant	1.12609	0.466543	424.491	576
jgi|Phlrad1|132315|plus.g3940.t1	S03_quant	0	0	417.549	576
jgi|Phlrad1|132315|plus.g3940.t1	S04_quant	0	0	431.364	576
jgi|Phlrad1|132315|plus.g3940.t1	S05_quant	0	0	413.479	576
jgi|Phlrad1|132315|plus.g3940.t1	S06_quant	0	0	416.806	576
jgi|Phlrad1|132316|plus.g3941.t1	S01_quant	0	0	1578.61	1722
jgi|Phlrad1|132316|plus.g3941.t1	S02_quant	0	0	1570.44	1722
jgi|Phlrad1|132316|plus.g3941.t1	S03_quant	0	0	1563.35	1722
jgi|Phlrad1|132316|plus.g3941.t1	S04_quant	0	0	1577.23	1722
jgi|Phlrad1|132316|plus.g3941.t1	S05_quant	0	0	1559.35	1722
jgi|Phlrad1|132316|plus.g3941.t1	S06_quant	0	0	1562.63	1722
jgi|Phlrad1|132317|plus.g3942.t1	S01_quant	0	0	3180.61	3324
jgi|Phlrad1|132317|plus.g3942.t1	S02_quant	0	0	3172.44	3324
jgi|Phlrad1|132317|plus.g3942.t1	S03_quant	0	0	3165.35	3324
jgi|Phlrad1|132317|plus.g3942.t1	S04_quant	0	0	3179.23	3324
jgi|Phlrad1|132317|plus.g3942.t1	S05_quant	0	0	3161.35	3324
jgi|Phlrad1|132317|plus.g3942.t1	S06_quant	0	0	3164.63	3324
jgi|Phlrad1|132318|plus.g3943.t1	S01_quant	0	0	1530.61	1674
jgi|Phlrad1|132318|plus.g3943.t1	S02_quant	0	0	1522.44	1674
jgi|Phlrad1|132318|plus.g3943.t1	S03_quant	0	0	1515.35	1674
jgi|Phlrad1|132318|plus.g3943.t1	S04_quant	0	0	1529.23	1674
jgi|Phlrad1|132318|plus.g3943.t1	S05_quant	0	0	1511.35	1674
jgi|Phlrad1|132318|plus.g3943.t1	S06_quant	0	0	1514.63	1674
jgi|Phlrad1|132319|plus.g3944.t1	S01_quant	0	0	2898.61	3042
jgi|Phlrad1|132319|plus.g3944.t1	S02_quant	0	0	2890.44	3042
jgi|Phlrad1|132319|plus.g3944.t1	S03_quant	0	0	2883.35	3042
jgi|Phlrad1|132319|plus.g3944.t1	S04_quant	0	0	2897.23	3042
jgi|Phlrad1|132319|plus.g3944.t1	S05_quant	0	0	2879.35	3042
jgi|Phlrad1|132319|plus.g3944.t1	S06_quant	0	0	2882.63	3042
jgi|Phlrad1|132320|plus.g3945.t1	S01_quant	0	0	1284.61	1428
jgi|Phlrad1|132320|plus.g3945.t1	S02_quant	0	0	1276.44	1428
jgi|Phlrad1|132320|plus.g3945.t1	S03_quant	0	0	1269.35	1428
jgi|Phlrad1|132320|plus.g3945.t1	S04_quant	0	0	1283.23	1428
jgi|Phlrad1|132320|plus.g3945.t1	S05_quant	0	0	1265.35	1428
jgi|Phlrad1|132320|plus.g3945.t1	S06_quant	0	0	1268.63	1428
jgi|Phlrad1|132321|plus.g3946.t1	S01_quant	596.493	37.8215	2802.61	2946
jgi|Phlrad1|132321|plus.g3946.t1	S02_quant	618.094	38.8996	2794.44	2946
jgi|Phlrad1|132321|plus.g3946.t1	S03_quant	651.231	40.7584	2787.35	2946
jgi|Phlrad1|132321|plus.g3946.t1	S04_quant	652.29	41.2813	2801.23	2946
jgi|Phlrad1|132321|plus.g3946.t1	S05_quant	682.867	42.5505	2783.35	2946
jgi|Phlrad1|132321|plus.g3946.t1	S06_quant	625.247	39.1371	2786.63	2946
jgi|Phlrad1|132322|minus.g3912.t1	S01_quant	263.069	25.2474	1851.61	1995
jgi|Phlrad1|132322|minus.g3912.t1	S02_quant	306.799	29.2692	1843.44	1995
jgi|Phlrad1|132322|minus.g3912.t1	S03_quant	187.255	17.789	1836.35	1995
jgi|Phlrad1|132322|minus.g3912.t1	S04_quant	487.913	46.7497	1850.23	1995
jgi|Phlrad1|132322|minus.g3912.t1	S05_quant	440.353	41.6802	1832.35	1995
jgi|Phlrad1|132322|minus.g3912.t1	S06_quant	614.667	58.408	1835.63	1995
jgi|Phlrad1|132323|minus.g3913.t1	S01_quant	517.981	128.269	717.609	861
jgi|Phlrad1|132323|minus.g3913.t1	S02_quant	509.084	126.2	709.44	861
jgi|Phlrad1|132323|minus.g3913.t1	S03_quant	480.621	119.378	702.348	861
jgi|Phlrad1|132323|minus.g3913.t1	S04_quant	516.614	127.872	716.227	861
jgi|Phlrad1|132323|minus.g3913.t1	S05_quant	444.912	110.494	698.348	861
jgi|Phlrad1|132323|minus.g3913.t1	S06_quant	459.149	114.147	701.627	861
jgi|Phlrad1|132324|plus.g3949.t1	S01_quant	243.696	22.7253	1905.61	2049
jgi|Phlrad1|132324|plus.g3949.t1	S02_quant	248.361	23.0198	1897.44	2049
jgi|Phlrad1|132324|plus.g3949.t1	S03_quant	278.802	25.7292	1890.35	2049
jgi|Phlrad1|132324|plus.g3949.t1	S04_quant	252.219	23.4812	1904.23	2049
jgi|Phlrad1|132324|plus.g3949.t1	S05_quant	256.189	23.5545	1886.35	2049
jgi|Phlrad1|132324|plus.g3949.t1	S06_quant	250.733	23.1448	1889.63	2049
jgi|Phlrad1|132325|plus.g3950.t1	S01_quant	192.713	85.0231	402.783	546
jgi|Phlrad1|132325|plus.g3950.t1	S02_quant	194.419	86.6644	394.533	546
jgi|Phlrad1|132325|plus.g3950.t1	S03_quant	241.351	108.54	387.911	546
jgi|Phlrad1|132325|plus.g3950.t1	S04_quant	171.335	75.6701	401.405	546
jgi|Phlrad1|132325|plus.g3950.t1	S05_quant	165.018	74.6245	383.52	546
jgi|Phlrad1|132325|plus.g3950.t1	S06_quant	184.083	82.943	387.124	546
jgi|Phlrad1|132326|minus.g3916.t1	S01_quant	2045.41	506.511	717.609	861
jgi|Phlrad1|132326|minus.g3916.t1	S02_quant	1213.71	300.875	709.44	861
jgi|Phlrad1|132326|minus.g3916.t1	S03_quant	990.371	245.991	702.348	861
jgi|Phlrad1|132326|minus.g3916.t1	S04_quant	1515.92	375.221	716.227	861
jgi|Phlrad1|132326|minus.g3916.t1	S05_quant	1513.43	375.86	698.348	861
jgi|Phlrad1|132326|minus.g3916.t1	S06_quant	1220.87	303.515	701.627	861
jgi|Phlrad1|132327|minus.g3917.t1	S01_quant	1049.22	79.2522	2352.61	2496
jgi|Phlrad1|132327|minus.g3917.t1	S02_quant	832.741	62.4678	2344.44	2496
jgi|Phlrad1|132327|minus.g3917.t1	S03_quant	904.026	67.473	2337.35	2496
jgi|Phlrad1|132327|minus.g3917.t1	S04_quant	895.812	67.5435	2351.23	2496
jgi|Phlrad1|132327|minus.g3917.t1	S05_quant	819.622	60.9215	2333.35	2496
jgi|Phlrad1|132327|minus.g3917.t1	S06_quant	743.737	55.5196	2336.63	2496
jgi|Phlrad1|132328|plus.g3954.t1	S01_quant	360.955	26.0997	2457.61	2601
jgi|Phlrad1|132328|plus.g3954.t1	S02_quant	352.875	25.3361	2449.44	2601
jgi|Phlrad1|132328|plus.g3954.t1	S03_quant	406.76	29.0538	2442.35	2601
jgi|Phlrad1|132328|plus.g3954.t1	S04_quant	399.202	28.8128	2456.23	2601
jgi|Phlrad1|132328|plus.g3954.t1	S05_quant	401.15	28.533	2438.35	2601
jgi|Phlrad1|132328|plus.g3954.t1	S06_quant	442.222	31.592	2441.63	2601
jgi|Phlrad1|132329|minus.g3919.t1	S01_quant	70.3556	13.0559	957.609	1101
jgi|Phlrad1|132329|minus.g3919.t1	S02_quant	71.9236	13.3226	949.44	1101
jgi|Phlrad1|132329|minus.g3919.t1	S03_quant	88.426	16.3697	942.348	1101
jgi|Phlrad1|132329|minus.g3919.t1	S04_quant	69.5776	12.8994	956.227	1101
jgi|Phlrad1|132329|minus.g3919.t1	S05_quant	65.6427	12.1327	938.348	1101
jgi|Phlrad1|132329|minus.g3919.t1	S06_quant	72.9984	13.5223	941.627	1101
jgi|Phlrad1|132330|plus.g3956.t1	S01_quant	519	140.248	657.609	801
jgi|Phlrad1|132330|plus.g3956.t1	S02_quant	514.703	139.381	649.44	801
jgi|Phlrad1|132330|plus.g3956.t1	S03_quant	641.869	174.321	642.348	801
jgi|Phlrad1|132330|plus.g3956.t1	S04_quant	465.3	125.701	656.227	801
jgi|Phlrad1|132330|plus.g3956.t1	S05_quant	500.526	135.989	638.348	801
jgi|Phlrad1|132330|plus.g3956.t1	S06_quant	477.134	129.71	641.627	801
jgi|Phlrad1|132331|minus.g3921.t1	S01_quant	145.81	25.4625	1017.61	1161
jgi|Phlrad1|132331|minus.g3921.t1	S02_quant	157.333	27.411	1009.44	1161
jgi|Phlrad1|132331|minus.g3921.t1	S03_quant	140.441	24.4427	1002.35	1161
jgi|Phlrad1|132331|minus.g3921.t1	S04_quant	128.719	22.4549	1016.23	1161
jgi|Phlrad1|132331|minus.g3921.t1	S05_quant	151.343	26.2916	998.348	1161
jgi|Phlrad1|132331|minus.g3921.t1	S06_quant	171.387	29.8462	1001.63	1161
jgi|Phlrad1|132332|plus.g3958.t1	S01_quant	191.694	44.3199	768.609	912
jgi|Phlrad1|132332|plus.g3958.t1	S02_quant	216.895	50.1614	760.44	912
jgi|Phlrad1|132332|plus.g3958.t1	S03_quant	238.23	55.1663	753.348	912
jgi|Phlrad1|132332|plus.g3958.t1	S04_quant	200.036	46.2216	767.227	912
jgi|Phlrad1|132332|plus.g3958.t1	S05_quant	247.984	57.3952	749.348	912
jgi|Phlrad1|132332|plus.g3958.t1	S06_quant	248.618	57.6194	752.627	912
jgi|Phlrad1|132333|minus.g3923.t1	S01_quant	143.77	48.3315	528.609	672
jgi|Phlrad1|132333|minus.g3923.t1	S02_quant	113.504	38.3555	520.44	672
jgi|Phlrad1|132333|minus.g3923.t1	S03_quant	89.4663	30.3968	513.458	672
jgi|Phlrad1|132333|minus.g3923.t1	S04_quant	84.3629	28.3671	527.227	672
jgi|Phlrad1|132333|minus.g3923.t1	S05_quant	82.9651	28.2499	509.348	672
jgi|Phlrad1|132333|minus.g3923.t1	S06_quant	82.5199	28.0785	512.627	672
jgi|Phlrad1|132334|plus.g3960.t1	S01_quant	375.23	115.043	579.609	723
jgi|Phlrad1|132334|plus.g3960.t1	S02_quant	315.79	97.1881	571.44	723
jgi|Phlrad1|132334|plus.g3960.t1	S03_quant	302.729	93.5793	564.348	723
jgi|Phlrad1|132334|plus.g3960.t1	S04_quant	296.575	90.9278	578.227	723
jgi|Phlrad1|132334|plus.g3960.t1	S05_quant	343.713	106.383	560.348	723
jgi|Phlrad1|132334|plus.g3960.t1	S06_quant	284.588	88.0726	563.627	723
jgi|Phlrad1|132335|minus.g3925.t1	S01_quant	315.071	25.8777	2163.61	2307
jgi|Phlrad1|132335|minus.g3925.t1	S02_quant	303.428	24.7574	2155.44	2307
jgi|Phlrad1|132335|minus.g3925.t1	S03_quant	286.084	23.2307	2148.35	2307
jgi|Phlrad1|132335|minus.g3925.t1	S04_quant	296.575	24.3161	2162.23	2307
jgi|Phlrad1|132335|minus.g3925.t1	S05_quant	288.099	23.3014	2144.35	2307
jgi|Phlrad1|132335|minus.g3925.t1	S06_quant	304.689	24.7465	2147.63	2307
jgi|Phlrad1|132336|plus.g3962.t1	S01_quant	1692.61	286.294	1050.61	1194
jgi|Phlrad1|132336|plus.g3962.t1	S02_quant	1573.33	265.433	1042.44	1194
jgi|Phlrad1|132336|plus.g3962.t1	S03_quant	1671.77	281.685	1035.35	1194
jgi|Phlrad1|132336|plus.g3962.t1	S04_quant	1668.12	281.851	1049.23	1194
jgi|Phlrad1|132336|plus.g3962.t1	S05_quant	1934.64	325.335	1031.35	1194
jgi|Phlrad1|132336|plus.g3962.t1	S06_quant	1597.5	269.323	1034.63	1194
jgi|Phlrad1|132337|minus.g3927.t1	S01_quant	169.261	105.796	284.304	426
jgi|Phlrad1|132337|minus.g3927.t1	S02_quant	85.4093	54.4835	275.693	426
jgi|Phlrad1|132337|minus.g3927.t1	S03_quant	58.2571	37.6494	269.938	426
jgi|Phlrad1|132337|minus.g3927.t1	S04_quant	123.5	77.4537	282.675	426
jgi|Phlrad1|132337|minus.g3927.t1	S05_quant	135.844	88.8593	265.139	426
jgi|Phlrad1|132337|minus.g3927.t1	S06_quant	83.5778	54.1367	269.287	426
jgi|Phlrad1|132338|plus.g3964.t1	S01_quant	478.214	35.2673	2409.61	2553
jgi|Phlrad1|132338|plus.g3964.t1	S02_quant	523.694	38.3523	2401.44	2553
jgi|Phlrad1|132338|plus.g3964.t1	S03_quant	432.767	31.5311	2394.35	2553
jgi|Phlrad1|132338|plus.g3964.t1	S04_quant	520.962	38.3504	2408.23	2553
jgi|Phlrad1|132338|plus.g3964.t1	S05_quant	660.986	47.9587	2390.35	2553
jgi|Phlrad1|132338|plus.g3964.t1	S06_quant	555.422	40.4747	2393.63	2553
jgi|Phlrad1|132339|plus.g3965.t1	S01_quant	1040.04	39.1349	4722.61	4866
jgi|Phlrad1|132339|plus.g3965.t1	S02_quant	1118.19	41.7129	4714.44	4866
jgi|Phlrad1|132339|plus.g3965.t1	S03_quant	1321.19	48.9622	4707.35	4866
jgi|Phlrad1|132339|plus.g3965.t1	S04_quant	1151.51	43.2388	4721.23	4866
jgi|Phlrad1|132339|plus.g3965.t1	S05_quant	1169.72	43.133	4703.35	4866
jgi|Phlrad1|132339|plus.g3965.t1	S06_quant	1116.13	41.3641	4706.63	4866
jgi|Phlrad1|132340|minus.g3930.t1	S01_quant	431.311	45.2023	1695.61	1839
jgi|Phlrad1|132340|minus.g3930.t1	S02_quant	466.38	48.6068	1687.44	1839
jgi|Phlrad1|132340|minus.g3930.t1	S03_quant	424.445	44.0651	1680.35	1839
jgi|Phlrad1|132340|minus.g3930.t1	S04_quant	524.441	54.8765	1694.23	1839
jgi|Phlrad1|132340|minus.g3930.t1	S05_quant	525.142	54.3311	1676.35	1839
jgi|Phlrad1|132340|minus.g3930.t1	S06_quant	595.624	61.8552	1679.63	1839
jgi|Phlrad1|132341|minus.g3931.t1	S01_quant	302.835	31.794	1692.61	1836
jgi|Phlrad1|132341|minus.g3931.t1	S02_quant	277.58	28.9814	1684.44	1836
jgi|Phlrad1|132341|minus.g3931.t1	S03_quant	347.462	36.1374	1677.35	1836
jgi|Phlrad1|132341|minus.g3931.t1	S04_quant	338.321	35.4641	1691.23	1836
jgi|Phlrad1|132341|minus.g3931.t1	S05_quant	295.392	30.616	1673.35	1836
jgi|Phlrad1|132341|minus.g3931.t1	S06_quant	341.717	35.5506	1676.63	1836
jgi|Phlrad1|132342|plus.g3968.t1	S01_quant	356.876	57.1022	1110.61	1254
jgi|Phlrad1|132342|plus.g3968.t1	S02_quant	327.028	52.1693	1102.44	1254
jgi|Phlrad1|132342|plus.g3968.t1	S03_quant	334.978	53.3504	1095.35	1254
jgi|Phlrad1|132342|plus.g3968.t1	S04_quant	327.015	52.2646	1109.23	1254
jgi|Phlrad1|132342|plus.g3968.t1	S05_quant	397.503	63.1704	1091.35	1254
jgi|Phlrad1|132342|plus.g3968.t1	S06_quant	341.717	54.4524	1094.63	1254
jgi|Phlrad1|132343|plus.g3969.t1	S01_quant	825.914	139.3	1053.61	1197
jgi|Phlrad1|132343|plus.g3969.t1	S02_quant	964.226	162.205	1045.44	1197
jgi|Phlrad1|132343|plus.g3969.t1	S03_quant	1164.1	195.578	1038.35	1197
jgi|Phlrad1|132343|plus.g3969.t1	S04_quant	1009.75	170.123	1052.23	1197
jgi|Phlrad1|132343|plus.g3969.t1	S05_quant	1027.49	172.285	1034.35	1197
jgi|Phlrad1|132343|plus.g3969.t1	S06_quant	933.109	156.858	1037.63	1197
jgi|Phlrad1|132344|minus.g3934.t1	S01_quant	102.984	30.4702	600.609	744
jgi|Phlrad1|132344|minus.g3934.t1	S02_quant	88.7807	26.3548	592.44	744
jgi|Phlrad1|132344|minus.g3934.t1	S03_quant	79.0632	23.5631	585.348	744
jgi|Phlrad1|132344|minus.g3934.t1	S04_quant	105.236	31.134	599.227	744
jgi|Phlrad1|132344|minus.g3934.t1	S05_quant	91.1704	27.1991	581.348	744
jgi|Phlrad1|132344|minus.g3934.t1	S06_quant	101.563	30.3021	584.627	744
jgi|Phlrad1|132345|plus.g3971.t1	S01_quant	925.839	39.2791	4188.61	4332
[truncated: 85,775 more rows]

## Sheet: 24hr-tpm
target_id	sample	est_counts	tpm	eff_len	len
jgi|Phlrad1|132012|plus.g3673.t1	S07_quant	0	0	565.642	729
jgi|Phlrad1|132012|plus.g3673.t1	S08_quant	0	0	574.318	729
jgi|Phlrad1|132012|plus.g3673.t1	S09_quant	0	0	568.21	729
jgi|Phlrad1|132012|plus.g3673.t1	S10_quant	0	0	572.716	729
jgi|Phlrad1|132012|plus.g3673.t1	S11_quant	0	0	579.81	729
jgi|Phlrad1|132012|plus.g3673.t1	S12_quant	0	0	562.822	729
jgi|Phlrad1|132013|plus.g3674.t1	S07_quant	0	0	4111.64	4275
jgi|Phlrad1|132013|plus.g3674.t1	S08_quant	0	0	4120.32	4275
jgi|Phlrad1|132013|plus.g3674.t1	S09_quant	0	0	4114.15	4275
jgi|Phlrad1|132013|plus.g3674.t1	S10_quant	0	0	4118.72	4275
jgi|Phlrad1|132013|plus.g3674.t1	S11_quant	0	0	4125.81	4275
jgi|Phlrad1|132013|plus.g3674.t1	S12_quant	0	0	4108.82	4275
jgi|Phlrad1|132014|minus.g3636.t1	S07_quant	0	0	583.642	747
jgi|Phlrad1|132014|minus.g3636.t1	S08_quant	0	0	592.318	747
jgi|Phlrad1|132014|minus.g3636.t1	S09_quant	0	0	586.153	747
jgi|Phlrad1|132014|minus.g3636.t1	S10_quant	0	0	590.716	747
jgi|Phlrad1|132014|minus.g3636.t1	S11_quant	0	0	597.81	747
jgi|Phlrad1|132014|minus.g3636.t1	S12_quant	0	0	580.822	747
jgi|Phlrad1|132015|plus.g3676.t1	S07_quant	0.975065	0.783995	207.124	366
jgi|Phlrad1|132015|plus.g3676.t1	S08_quant	0	0	216.059	366
jgi|Phlrad1|132015|plus.g3676.t1	S09_quant	0	0	210.768	366
jgi|Phlrad1|132015|plus.g3676.t1	S10_quant	1.95457	1.53999	213.12	366
jgi|Phlrad1|132015|plus.g3676.t1	S11_quant	1.43512	1.10237	220.942	366
jgi|Phlrad1|132015|plus.g3676.t1	S12_quant	1.11692	0.904889	204.747	366
jgi|Phlrad1|132016|minus.g3638.t1	S07_quant	0	0	335.253	498
jgi|Phlrad1|132016|minus.g3638.t1	S08_quant	0	0	343.835	498
jgi|Phlrad1|132016|minus.g3638.t1	S09_quant	2.6074	1.29148	337.823	498
jgi|Phlrad1|132016|minus.g3638.t1	S10_quant	2.43855	1.19682	342.13	498
jgi|Phlrad1|132016|minus.g3638.t1	S11_quant	1.28069	0.621981	349.451	498
jgi|Phlrad1|132016|minus.g3638.t1	S12_quant	0	0	332.53	498
jgi|Phlrad1|132017|minus.g3639.t1	S07_quant	71.1797	17.9977	658.642	822
jgi|Phlrad1|132017|minus.g3639.t1	S08_quant	63.8961	16.129	667.318	822
jgi|Phlrad1|132017|minus.g3639.t1	S09_quant	45.9605	11.6319	661.153	822
jgi|Phlrad1|132017|minus.g3639.t1	S10_quant	42.5046	10.721	665.716	822
jgi|Phlrad1|132017|minus.g3639.t1	S11_quant	35.2865	8.90094	672.81	822
jgi|Phlrad1|132017|minus.g3639.t1	S12_quant	44.6767	11.3002	655.822	822
jgi|Phlrad1|132018|minus.g3640.t1	S07_quant	635.742	209.364	505.696	669
jgi|Phlrad1|132018|minus.g3640.t1	S08_quant	598.906	196.152	514.318	669
jgi|Phlrad1|132018|minus.g3640.t1	S09_quant	368.705	121.396	508.21	669
jgi|Phlrad1|132018|minus.g3640.t1	S10_quant	820.437	268.667	512.767	669
jgi|Phlrad1|132018|minus.g3640.t1	S11_quant	698.101	227.902	519.864	669
jgi|Phlrad1|132018|minus.g3640.t1	S12_quant	805.297	265.664	502.822	669
jgi|Phlrad1|132019|minus.g3641.t1	S07_quant	329.572	66.3961	826.642	990
jgi|Phlrad1|132019|minus.g3641.t1	S08_quant	307.083	61.9254	835.318	990
jgi|Phlrad1|132019|minus.g3641.t1	S09_quant	308.446	62.2462	829.153	990
jgi|Phlrad1|132019|minus.g3641.t1	S10_quant	248.108	49.9704	833.716	990
jgi|Phlrad1|132019|minus.g3641.t1	S11_quant	287.061	57.9423	840.81	990
jgi|Phlrad1|132019|minus.g3641.t1	S12_quant	241.254	48.5772	823.822	990
jgi|Phlrad1|132020|plus.g3680.t1	S07_quant	146.26	14.331	1699.64	1863
jgi|Phlrad1|132020|plus.g3680.t1	S08_quant	128.746	12.6949	1708.32	1863
jgi|Phlrad1|132020|plus.g3680.t1	S09_quant	144.009	14.1567	1702.15	1863
jgi|Phlrad1|132020|plus.g3680.t1	S10_quant	129.491	12.7399	1706.72	1863
jgi|Phlrad1|132020|plus.g3680.t1	S11_quant	109.674	10.8608	1713.81	1863
jgi|Phlrad1|132020|plus.g3680.t1	S12_quant	132.913	12.9934	1696.82	1863
jgi|Phlrad1|132021|minus.g3643.t1	S07_quant	357.849	34.1588	1744.64	1908
jgi|Phlrad1|132021|minus.g3643.t1	S08_quant	338.554	32.5261	1753.32	1908
jgi|Phlrad1|132021|minus.g3643.t1	S09_quant	335.001	32.0836	1747.15	1908
jgi|Phlrad1|132021|minus.g3643.t1	S10_quant	354.864	34.0164	1751.72	1908
jgi|Phlrad1|132021|minus.g3643.t1	S11_quant	351.912	33.9574	1758.81	1908
jgi|Phlrad1|132021|minus.g3643.t1	S12_quant	271.411	25.8473	1741.82	1908
jgi|Phlrad1|132022|plus.g3682.t1	S07_quant	241.816	27.1985	1480.64	1644
jgi|Phlrad1|132022|plus.g3682.t1	S08_quant	272.75	30.8492	1489.32	1644
jgi|Phlrad1|132022|plus.g3682.t1	S09_quant	250.229	28.2306	1483.15	1644
jgi|Phlrad1|132022|plus.g3682.t1	S10_quant	236.246	26.6646	1487.72	1644
jgi|Phlrad1|132022|plus.g3682.t1	S11_quant	265.126	30.1013	1494.81	1644
jgi|Phlrad1|132022|plus.g3682.t1	S12_quant	301.567	33.8496	1477.82	1644
jgi|Phlrad1|132023|minus.g3645.t1	S07_quant	78.9803	10.7579	1222.64	1386
jgi|Phlrad1|132023|minus.g3645.t1	S08_quant	61.035	8.34977	1231.32	1386
jgi|Phlrad1|132023|minus.g3645.t1	S09_quant	61.2806	8.36954	1225.15	1386
jgi|Phlrad1|132023|minus.g3645.t1	S10_quant	71.1704	9.71817	1229.72	1386
jgi|Phlrad1|132023|minus.g3645.t1	S11_quant	62.9436	8.6371	1236.81	1386
jgi|Phlrad1|132023|minus.g3645.t1	S12_quant	63.6642	8.65746	1219.82	1386
jgi|Phlrad1|132024|minus.g3646.t1	S07_quant	19.5013	18.965	171.246	327
jgi|Phlrad1|132024|minus.g3646.t1	S08_quant	15.2588	14.2674	180.153	327
jgi|Phlrad1|132024|minus.g3646.t1	S09_quant	17.3628	16.5932	175.089	327
jgi|Phlrad1|132024|minus.g3646.t1	S10_quant	13.8387	13.1789	176.322	327
jgi|Phlrad1|132024|minus.g3646.t1	S11_quant	20.0275	18.3809	184.918	327
jgi|Phlrad1|132024|minus.g3646.t1	S12_quant	17.8707	17.5027	169.367	327
jgi|Phlrad1|132025|minus.g3647.t1	S07_quant	126.758	21.5486	979.642	1143
jgi|Phlrad1|132025|minus.g3647.t1	S08_quant	118.255	20.1553	988.318	1143
jgi|Phlrad1|132025|minus.g3647.t1	S09_quant	98.049	16.7045	982.153	1143
jgi|Phlrad1|132025|minus.g3647.t1	S10_quant	95.8824	16.3169	986.716	1143
jgi|Phlrad1|132025|minus.g3647.t1	S11_quant	101.091	17.2635	993.81	1143
jgi|Phlrad1|132025|minus.g3647.t1	S12_quant	113.925	19.3463	976.822	1143
jgi|Phlrad1|132026|minus.g3648.t1	S07_quant	170.636	20.6125	1378.64	1542
jgi|Phlrad1|132026|minus.g3648.t1	S08_quant	145.912	17.7166	1387.32	1542
jgi|Phlrad1|132026|minus.g3648.t1	S09_quant	158.308	19.1792	1381.15	1542
jgi|Phlrad1|132026|minus.g3648.t1	S10_quant	125.537	15.212	1385.72	1542
jgi|Phlrad1|132026|minus.g3648.t1	S11_quant	146.868	17.896	1392.81	1542
jgi|Phlrad1|132026|minus.g3648.t1	S12_quant	120.627	14.5437	1375.82	1542
jgi|Phlrad1|132027|plus.g3686.t1	S07_quant	168.686	29.9607	937.642	1101
jgi|Phlrad1|132027|plus.g3686.t1	S08_quant	148.773	26.4821	946.318	1101
jgi|Phlrad1|132027|plus.g3686.t1	S09_quant	137.881	24.5401	940.153	1101
jgi|Phlrad1|132027|plus.g3686.t1	S10_quant	164.087	29.1651	944.716	1101
jgi|Phlrad1|132027|plus.g3686.t1	S11_quant	164.988	29.4186	951.81	1101
jgi|Phlrad1|132027|plus.g3686.t1	S12_quant	158.602	28.1431	934.822	1101
jgi|Phlrad1|132028|plus.g3687.t1	S07_quant	0.975065	1.65894	97.8843	240
jgi|Phlrad1|132028|plus.g3687.t1	S08_quant	3.81469	5.9258	108.437	240
jgi|Phlrad1|132028|plus.g3687.t1	S09_quant	4.08537	6.53748	104.566	240
jgi|Phlrad1|132028|plus.g3687.t1	S10_quant	2.96543	4.8891	101.847	240
jgi|Phlrad1|132028|plus.g3687.t1	S11_quant	0.95369	1.44474	112.031	240
jgi|Phlrad1|132028|plus.g3687.t1	S12_quant	2.23383	3.77998	98.0286	240
jgi|Phlrad1|132029|minus.g3650.t1	S07_quant	239.866	16.2078	2464.64	2628
jgi|Phlrad1|132029|minus.g3650.t1	S08_quant	258.445	17.6017	2473.32	2628
jgi|Phlrad1|132029|minus.g3650.t1	S09_quant	314.574	21.3351	2467.15	2628
jgi|Phlrad1|132029|minus.g3650.t1	S10_quant	320.267	21.7572	2471.72	2628
jgi|Phlrad1|132029|minus.g3650.t1	S11_quant	314.718	21.5475	2478.81	2628
jgi|Phlrad1|132029|minus.g3650.t1	S12_quant	336.192	22.6528	2461.82	2628
jgi|Phlrad1|132030|minus.g3651.t1	S07_quant	138.459	18.5411	1243.64	1407
jgi|Phlrad1|132030|minus.g3651.t1	S08_quant	131.607	17.7023	1252.32	1407
jgi|Phlrad1|132030|minus.g3651.t1	S09_quant	129.711	17.417	1246.15	1407
jgi|Phlrad1|132030|minus.g3651.t1	S10_quant	127.514	17.1194	1250.72	1407
jgi|Phlrad1|132030|minus.g3651.t1	S11_quant	119.211	16.085	1257.81	1407
jgi|Phlrad1|132030|minus.g3651.t1	S12_quant	91.5872	12.2438	1240.82	1407
jgi|Phlrad1|132031|minus.g3652.t1	S07_quant	165.761	20.9346	1318.64	1482
jgi|Phlrad1|132031|minus.g3652.t1	S08_quant	118.255	15.0076	1327.32	1482
jgi|Phlrad1|132031|minus.g3652.t1	S09_quant	137.881	17.4631	1321.15	1482
jgi|Phlrad1|132031|minus.g3652.t1	S10_quant	112.687	14.2729	1325.72	1482
jgi|Phlrad1|132031|minus.g3652.t1	S11_quant	99.1838	12.6297	1332.81	1482
jgi|Phlrad1|132031|minus.g3652.t1	S12_quant	132.913	16.7557	1315.82	1482
jgi|Phlrad1|132032|plus.g3690.t1	S07_quant	243.766	71.0164	571.642	735
jgi|Phlrad1|132032|plus.g3690.t1	S08_quant	270.843	78.6171	580.318	735
jgi|Phlrad1|132032|plus.g3690.t1	S09_quant	278.827	81.2598	574.153	735
jgi|Phlrad1|132032|plus.g3690.t1	S10_quant	276.774	80.3063	578.716	735
jgi|Phlrad1|132032|plus.g3690.t1	S11_quant	211.719	61.3371	585.81	735
jgi|Phlrad1|132032|plus.g3690.t1	S12_quant	234.552	68.3999	568.822	735
jgi|Phlrad1|132033|plus.g3691.t2	S07_quant	0	0	5362.64	5526
jgi|Phlrad1|132033|plus.g3691.t2	S08_quant	0	0	5371.32	5526
jgi|Phlrad1|132033|plus.g3691.t2	S09_quant	1.43484	0.0447498	5365.15	5526
jgi|Phlrad1|132033|plus.g3691.t2	S10_quant	0.988478	0.0309105	5369.72	5526
jgi|Phlrad1|132033|plus.g3691.t2	S11_quant	1.34271	0.0423816	5376.81	5526
jgi|Phlrad1|132033|plus.g3691.t2	S12_quant	1.56755	0.0485135	5359.82	5526
jgi|Phlrad1|132034|plus.g3691.t1	S07_quant	0.975065	0.105195	1543.64	1707
jgi|Phlrad1|132034|plus.g3691.t1	S08_quant	3.81469	0.413946	1552.32	1707
jgi|Phlrad1|132034|plus.g3691.t1	S09_quant	4.69322	0.507911	1546.15	1707
jgi|Phlrad1|132034|plus.g3691.t1	S10_quant	0	0	1550.72	1707
jgi|Phlrad1|132034|plus.g3691.t1	S11_quant	1.51836	0.165417	1557.81	1707
jgi|Phlrad1|132034|plus.g3691.t1	S12_quant	0.666283	0.0717295	1540.82	1707
jgi|Phlrad1|132035|minus.g3654.t1	S07_quant	0	0	730.642	894
jgi|Phlrad1|132035|minus.g3654.t1	S08_quant	0	0	739.318	894
jgi|Phlrad1|132035|minus.g3654.t1	S09_quant	0	0	733.153	894
jgi|Phlrad1|132035|minus.g3654.t1	S10_quant	0	0	737.716	894
jgi|Phlrad1|132035|minus.g3654.t1	S11_quant	0	0	744.81	894
jgi|Phlrad1|132035|minus.g3654.t1	S12_quant	0	0	727.822	894
jgi|Phlrad1|132036|plus.g3693.t1	S07_quant	0	0	1078.64	1242
jgi|Phlrad1|132036|plus.g3693.t1	S08_quant	0	0	1087.32	1242
jgi|Phlrad1|132036|plus.g3693.t1	S09_quant	0	0	1081.15	1242
jgi|Phlrad1|132036|plus.g3693.t1	S10_quant	0	0	1085.72	1242
jgi|Phlrad1|132036|plus.g3693.t1	S11_quant	0	0	1092.81	1242
jgi|Phlrad1|132036|plus.g3693.t1	S12_quant	0	0	1075.82	1242
jgi|Phlrad1|132037|plus.g3694.t1	S07_quant	0	0	1279.64	1443
jgi|Phlrad1|132037|plus.g3694.t1	S08_quant	0.953673	0.124693	1288.32	1443
jgi|Phlrad1|132037|plus.g3694.t1	S09_quant	1.02134	0.133291	1282.15	1443
jgi|Phlrad1|132037|plus.g3694.t1	S10_quant	0.988478	0.128995	1286.72	1443
jgi|Phlrad1|132037|plus.g3694.t1	S11_quant	0	0	1293.81	1443
jgi|Phlrad1|132037|plus.g3694.t1	S12_quant	0	0	1276.82	1443
jgi|Phlrad1|132038|plus.g3695.t1	S07_quant	0	0	2494.64	2658
jgi|Phlrad1|132038|plus.g3695.t1	S08_quant	0	0	2503.32	2658
jgi|Phlrad1|132038|plus.g3695.t1	S09_quant	0	0	2497.15	2658
jgi|Phlrad1|132038|plus.g3695.t1	S10_quant	0	0	2501.72	2658
jgi|Phlrad1|132038|plus.g3695.t1	S11_quant	0	0	2508.81	2658
jgi|Phlrad1|132038|plus.g3695.t1	S12_quant	0	0	2491.82	2658
jgi|Phlrad1|132039|plus.g3696.t1	S07_quant	0	0	3823.64	3987
jgi|Phlrad1|132039|plus.g3696.t1	S08_quant	0	0	3832.32	3987
jgi|Phlrad1|132039|plus.g3696.t1	S09_quant	0	0	3826.15	3987
jgi|Phlrad1|132039|plus.g3696.t1	S10_quant	0	0	3830.72	3987
jgi|Phlrad1|132039|plus.g3696.t1	S11_quant	0	0	3837.81	3987
jgi|Phlrad1|132039|plus.g3696.t1	S12_quant	0	0	3820.82	3987
jgi|Phlrad1|132040|plus.g3697.t1	S07_quant	9.75065	2.29797	706.642	870
jgi|Phlrad1|132040|plus.g3697.t1	S08_quant	9.53673	2.24577	715.318	870
jgi|Phlrad1|132040|plus.g3697.t1	S09_quant	7.14941	1.68694	709.153	870
jgi|Phlrad1|132040|plus.g3697.t1	S10_quant	7.90783	1.86047	713.716	870
jgi|Phlrad1|132040|plus.g3697.t1	S11_quant	8.58321	2.02092	720.81	870
jgi|Phlrad1|132040|plus.g3697.t1	S12_quant	17.8707	4.21182	703.822	870
jgi|Phlrad1|132041|minus.g3661.t1	S07_quant	36.0774	4.01714	1495.64	1659
jgi|Phlrad1|132041|minus.g3661.t1	S08_quant	20.9808	2.34935	1504.32	1659
jgi|Phlrad1|132041|minus.g3661.t1	S09_quant	30.6403	3.4222	1498.15	1659
jgi|Phlrad1|132041|minus.g3661.t1	S10_quant	30.6428	3.42406	1502.72	1659
jgi|Phlrad1|132041|minus.g3661.t1	S11_quant	19.0738	2.14405	1509.81	1659
jgi|Phlrad1|132041|minus.g3661.t1	S12_quant	24.5722	2.7304	1492.82	1659
jgi|Phlrad1|132042|minus.g3662.t1	S07_quant	6.82546	1.7337	655.642	819
jgi|Phlrad1|132042|minus.g3662.t1	S08_quant	9.53673	2.41818	664.318	819
jgi|Phlrad1|132042|minus.g3662.t1	S09_quant	7.14941	1.81766	658.153	819
jgi|Phlrad1|132042|minus.g3662.t1	S10_quant	17.7926	4.50819	662.716	819
jgi|Phlrad1|132042|minus.g3662.t1	S11_quant	15.259	3.8663	669.81	819
jgi|Phlrad1|132042|minus.g3662.t1	S12_quant	22.3383	5.67607	652.822	819
jgi|Phlrad1|132043|minus.g3663.t1	S07_quant	12.6758	3.58012	589.642	753
jgi|Phlrad1|132043|minus.g3663.t1	S08_quant	6.67571	1.87945	598.318	753
jgi|Phlrad1|132043|minus.g3663.t1	S09_quant	10.2134	2.88607	592.153	753
jgi|Phlrad1|132043|minus.g3663.t1	S10_quant	10.8733	3.05972	596.716	753
jgi|Phlrad1|132043|minus.g3663.t1	S11_quant	6.67583	1.8764	603.81	753
jgi|Phlrad1|132043|minus.g3663.t1	S12_quant	11.1692	3.15723	586.822	753
jgi|Phlrad1|132044|minus.g3664.t1	S07_quant	159.911	10.1736	2617.64	2781
jgi|Phlrad1|132044|minus.g3664.t1	S08_quant	127.792	8.19638	2626.32	2781
jgi|Phlrad1|132044|minus.g3664.t1	S09_quant	112.348	7.17475	2620.15	2781
jgi|Phlrad1|132044|minus.g3664.t1	S10_quant	99.8363	6.38699	2624.72	2781
jgi|Phlrad1|132044|minus.g3664.t1	S11_quant	92.508	5.96546	2631.81	2781
jgi|Phlrad1|132044|minus.g3664.t1	S12_quant	79.3011	5.0307	2614.82	2781
jgi|Phlrad1|132045|plus.g3702.t1	S07_quant	87.7559	10.7647	1357.64	1521
jgi|Phlrad1|132045|plus.g3702.t1	S08_quant	64.8497	7.99506	1366.32	1521
jgi|Phlrad1|132045|plus.g3702.t1	S09_quant	79.6648	9.80048	1360.15	1521
jgi|Phlrad1|132045|plus.g3702.t1	S10_quant	72.1589	8.87846	1364.72	1521
jgi|Phlrad1|132045|plus.g3702.t1	S11_quant	84.8784	10.5008	1371.81	1521
jgi|Phlrad1|132045|plus.g3702.t1	S12_quant	90.4702	11.0768	1354.82	1521
jgi|Phlrad1|132046|minus.g3666.t1	S07_quant	204.764	14.3241	2380.64	2544
jgi|Phlrad1|132046|minus.g3666.t1	S08_quant	237.464	16.7413	2389.32	2544
jgi|Phlrad1|132046|minus.g3666.t1	S09_quant	210.397	14.7726	2383.15	2544
jgi|Phlrad1|132046|minus.g3666.t1	S10_quant	189.788	13.3468	2387.72	2544
jgi|Phlrad1|132046|minus.g3666.t1	S11_quant	244.145	17.302	2394.81	2544
jgi|Phlrad1|132046|minus.g3666.t1	S12_quant	232.319	16.2068	2377.82	2544
jgi|Phlrad1|132047|plus.g3704.t1	S07_quant	14.626	2.38416	1021.64	1185
jgi|Phlrad1|132047|plus.g3704.t1	S08_quant	14.3051	2.33875	1030.32	1185
jgi|Phlrad1|132047|plus.g3704.t1	S09_quant	20.4269	3.33738	1024.15	1185
jgi|Phlrad1|132047|plus.g3704.t1	S10_quant	15.8157	2.58156	1028.72	1185
jgi|Phlrad1|132047|plus.g3704.t1	S11_quant	21.9349	3.59397	1035.81	1185
jgi|Phlrad1|132047|plus.g3704.t1	S12_quant	11.1692	1.8185	1018.82	1185
jgi|Phlrad1|132048|plus.g3705.t1	S07_quant	4.87533	6.41802	126.506	276
jgi|Phlrad1|132048|plus.g3705.t1	S08_quant	1.90735	2.3524	136.579	276
jgi|Phlrad1|132048|plus.g3705.t1	S09_quant	2.04269	2.58726	132.108	276
jgi|Phlrad1|132048|plus.g3705.t1	S10_quant	9.88478	12.6439	131.273	276
jgi|Phlrad1|132048|plus.g3705.t1	S11_quant	4.76845	5.76453	140.389	276
jgi|Phlrad1|132048|plus.g3705.t1	S12_quant	0	0	125.935	276
jgi|Phlrad1|132049|plus.g3706.t1	S07_quant	13.6509	2.10178	1081.64	1245
jgi|Phlrad1|132049|plus.g3706.t1	S08_quant	20.0271	3.09407	1090.32	1245
jgi|Phlrad1|132049|plus.g3706.t1	S09_quant	7.14941	1.10344	1084.15	1245
jgi|Phlrad1|132049|plus.g3706.t1	S10_quant	18.7811	2.89665	1088.72	1245
jgi|Phlrad1|132049|plus.g3706.t1	S11_quant	13.3517	2.06785	1095.81	1245
jgi|Phlrad1|132049|plus.g3706.t1	S12_quant	7.81842	1.20216	1078.82	1245
jgi|Phlrad1|132050|minus.g3669.t1	S07_quant	198.913	19.6988	1681.64	1845
jgi|Phlrad1|132050|minus.g3669.t1	S08_quant	191.688	19.1026	1690.32	1845
jgi|Phlrad1|132050|minus.g3669.t1	S09_quant	209.375	20.8024	1684.15	1845
jgi|Phlrad1|132050|minus.g3669.t1	S10_quant	208.569	20.7388	1688.72	1845
jgi|Phlrad1|132050|minus.g3669.t1	S11_quant	173.572	17.3708	1695.81	1845
jgi|Phlrad1|132050|minus.g3669.t1	S12_quant	196.577	19.4232	1678.82	1845
jgi|Phlrad1|132051|plus.g3708.t1	S07_quant	109.207	15.2878	1189.64	1353
jgi|Phlrad1|132051|plus.g3708.t1	S08_quant	124.931	17.5616	1198.32	1353
jgi|Phlrad1|132051|plus.g3708.t1	S09_quant	158.308	22.2198	1192.15	1353
jgi|Phlrad1|132051|plus.g3708.t1	S10_quant	66.228	9.29267	1196.72	1353
jgi|Phlrad1|132051|plus.g3708.t1	S11_quant	78.2026	11.0251	1203.81	1353
jgi|Phlrad1|132051|plus.g3708.t1	S12_quant	74.8334	10.4593	1186.82	1353
jgi|Phlrad1|132052|minus.g3671.t1	S07_quant	0	0	176.618	333
jgi|Phlrad1|132052|minus.g3671.t1	S08_quant	0	0	185.737	333
jgi|Phlrad1|132052|minus.g3671.t1	S09_quant	1.02134	0.946711	180.519	333
jgi|Phlrad1|132052|minus.g3671.t1	S10_quant	0	0	181.793	333
jgi|Phlrad1|132052|minus.g3671.t1	S11_quant	5.72214	5.10107	190.378	333
jgi|Phlrad1|132052|minus.g3671.t1	S12_quant	3.35075	3.1801	174.78	333
jgi|Phlrad1|132053|minus.g3672.t1	S07_quant	1322.19	97.0165	2269.64	2433
jgi|Phlrad1|132053|minus.g3672.t1	S08_quant	2022.74	149.552	2278.32	2433
jgi|Phlrad1|132053|minus.g3672.t1	S09_quant	2318.45	170.738	2272.15	2433
jgi|Phlrad1|132053|minus.g3672.t1	S10_quant	3249.13	239.634	2276.72	2433
jgi|Phlrad1|132053|minus.g3672.t1	S11_quant	3275.93	243.441	2283.81	2433
jgi|Phlrad1|132053|minus.g3672.t1	S12_quant	2425.94	177.523	2266.82	2433
jgi|Phlrad1|132054|minus.g3673.t1	S07_quant	154.06	84.795	302.573	465
jgi|Phlrad1|132054|minus.g3673.t1	S08_quant	198.183	107.265	311.225	465
jgi|Phlrad1|132054|minus.g3673.t1	S09_quant	254.28	139.29	305.465	465
jgi|Phlrad1|132054|minus.g3673.t1	S10_quant	331.081	179.67	309.42	465
jgi|Phlrad1|132054|minus.g3673.t1	S11_quant	339.452	181.839	316.818	465
jgi|Phlrad1|132054|minus.g3673.t1	S12_quant	217.75	120.311	300.223	465
jgi|Phlrad1|132055|plus.g3710.t1	S07_quant	32.1771	4.35083	1231.64	1395
jgi|Phlrad1|132055|plus.g3710.t1	S08_quant	39.2813	5.3348	1240.32	1395
jgi|Phlrad1|132055|plus.g3710.t1	S09_quant	35.7814	4.85129	1234.15	1395
jgi|Phlrad1|132055|plus.g3710.t1	S10_quant	40.5863	5.50171	1238.72	1395
jgi|Phlrad1|132055|plus.g3710.t1	S11_quant	29.6265	4.03597	1245.81	1395
jgi|Phlrad1|132055|plus.g3710.t1	S12_quant	40.2573	5.43434	1228.82	1395
jgi|Phlrad1|132056|plus.g3711.t1	S07_quant	8.77559	4.97411	293.812	456
jgi|Phlrad1|132056|plus.g3711.t1	S08_quant	21.9345	12.2217	302.317	456
jgi|Phlrad1|132056|plus.g3711.t1	S09_quant	20.4269	11.5268	296.526	456
jgi|Phlrad1|132056|plus.g3711.t1	S10_quant	37.5622	20.9905	300.482	456
jgi|Phlrad1|132056|plus.g3711.t1	S11_quant	21.9349	12.0913	307.881	456
jgi|Phlrad1|132056|plus.g3711.t1	S12_quant	18.9876	10.8086	291.401	456
jgi|Phlrad1|132057|minus.g3675.t1	S07_quant	38.0275	5.46115	1159.64	1323
jgi|Phlrad1|132057|minus.g3675.t1	S08_quant	33.3785	4.81251	1168.32	1323
jgi|Phlrad1|132057|minus.g3675.t1	S09_quant	32.683	4.70573	1162.15	1323
jgi|Phlrad1|132057|minus.g3675.t1	S10_quant	19.7696	2.84526	1166.72	1323
jgi|Phlrad1|132057|minus.g3675.t1	S11_quant	17.1664	2.482	1173.81	1323
jgi|Phlrad1|132057|minus.g3675.t1	S12_quant	14.5199	2.08204	1156.82	1323
jgi|Phlrad1|132058|plus.g3713.t1	S07_quant	45.8281	5.02227	1519.64	1683
jgi|Phlrad1|132058|plus.g3713.t1	S08_quant	47.6836	5.25558	1528.32	1683
jgi|Phlrad1|132058|plus.g3713.t1	S09_quant	24.5122	2.6946	1522.15	1683
jgi|Phlrad1|132058|plus.g3713.t1	S10_quant	37.5622	4.13126	1526.72	1683
jgi|Phlrad1|132058|plus.g3713.t1	S11_quant	34.3329	3.7989	1533.81	1683
jgi|Phlrad1|132058|plus.g3713.t1	S12_quant	29.0398	3.17578	1516.82	1683
jgi|Phlrad1|132059|plus.g3714.t1	S07_quant	39.0026	4.11974	1576.64	1740
jgi|Phlrad1|132059|plus.g3714.t1	S08_quant	41.9616	4.45862	1585.32	1740
jgi|Phlrad1|132059|plus.g3714.t1	S09_quant	39.8324	4.22067	1579.15	1740
jgi|Phlrad1|132059|plus.g3714.t1	S10_quant	40.5276	4.29698	1583.72	1740
jgi|Phlrad1|132059|plus.g3714.t1	S11_quant	42.9161	4.57848	1590.81	1740
jgi|Phlrad1|132059|plus.g3714.t1	S12_quant	43.5597	4.59115	1573.82	1740
jgi|Phlrad1|132060|minus.g3678.t1	S07_quant	15.601	1.86028	1396.64	1560
jgi|Phlrad1|132060|minus.g3678.t1	S08_quant	32.4249	3.88659	1405.32	1560
jgi|Phlrad1|132060|minus.g3678.t1	S09_quant	24.5122	2.93148	1399.15	1560
jgi|Phlrad1|132060|minus.g3678.t1	S10_quant	28.6659	3.42907	1403.72	1560
jgi|Phlrad1|132060|minus.g3678.t1	S11_quant	24.7959	2.98285	1410.81	1560
jgi|Phlrad1|132060|minus.g3678.t1	S12_quant	27.9229	3.32311	1393.82	1560
jgi|Phlrad1|132061|minus.g3679.t1	S07_quant	83.8556	17.8663	781.642	945
jgi|Phlrad1|132061|minus.g3679.t1	S08_quant	67.7108	14.4318	790.318	945
jgi|Phlrad1|132061|minus.g3679.t1	S09_quant	81.7075	17.4353	784.153	945
jgi|Phlrad1|132061|minus.g3679.t1	S10_quant	83.0322	17.6773	788.716	945
jgi|Phlrad1|132061|minus.g3679.t1	S11_quant	67.712	14.4403	795.81	945
jgi|Phlrad1|132061|minus.g3679.t1	S12_quant	79.3011	16.8901	778.822	945
jgi|Phlrad1|132062|minus.g3680.t1	S07_quant	76.0551	15.7216	805.642	969
jgi|Phlrad1|132062|minus.g3680.t1	S08_quant	82.9695	17.1629	814.318	969
jgi|Phlrad1|132062|minus.g3680.t1	S09_quant	74.5581	15.4372	808.153	969
jgi|Phlrad1|132062|minus.g3680.t1	S10_quant	85.9976	17.768	812.716	969
jgi|Phlrad1|132062|minus.g3680.t1	S11_quant	67.712	14.0175	819.81	969
jgi|Phlrad1|132062|minus.g3680.t1	S12_quant	64.7812	13.3851	802.822	969
jgi|Phlrad1|132063|minus.g3681.t1	S07_quant	72.1548	15.2562	787.642	951
jgi|Phlrad1|132063|minus.g3681.t1	S08_quant	53.4057	11.2971	796.318	951
jgi|Phlrad1|132063|minus.g3681.t1	S09_quant	67.4087	14.2749	790.153	951
jgi|Phlrad1|132063|minus.g3681.t1	S10_quant	83.0322	17.5438	794.716	951
jgi|Phlrad1|132063|minus.g3681.t1	S11_quant	60.0825	12.7173	801.81	951
jgi|Phlrad1|132063|minus.g3681.t1	S12_quant	58.0797	12.2756	784.822	951
jgi|Phlrad1|132064|minus.g3682.t1	S07_quant	60.454	12.6856	793.642	957
jgi|Phlrad1|132064|minus.g3682.t1	S08_quant	67.7108	14.216	802.318	957
jgi|Phlrad1|132064|minus.g3682.t1	S09_quant	75.5794	15.8846	796.153	957
jgi|Phlrad1|132064|minus.g3682.t1	S10_quant	88.963	18.6561	800.716	957
jgi|Phlrad1|132064|minus.g3682.t1	S11_quant	69.6194	14.6265	807.81	957
jgi|Phlrad1|132064|minus.g3682.t1	S12_quant	69.2488	14.5253	790.822	957
jgi|Phlrad1|132065|plus.g3720.t1	S07_quant	69.2296	21.522	535.696	699
jgi|Phlrad1|132065|plus.g3720.t1	S08_quant	58.174	18.0029	544.318	699
jgi|Phlrad1|132065|plus.g3720.t1	S09_quant	64.3446	20.0046	538.21	699
jgi|Phlrad1|132065|plus.g3720.t1	S10_quant	53.3778	16.515	542.716	699
jgi|Phlrad1|132065|plus.g3720.t1	S11_quant	61.0362	18.8406	549.81	699
jgi|Phlrad1|132065|plus.g3720.t1	S12_quant	75.9503	23.645	532.822	699
jgi|Phlrad1|132066|plus.g3721.t1	S07_quant	228.165	15.6845	2422.64	2586
jgi|Phlrad1|132066|plus.g3721.t1	S08_quant	398.635	27.6184	2431.32	2586
jgi|Phlrad1|132066|plus.g3721.t1	S09_quant	481.053	33.1912	2425.15	2586
jgi|Phlrad1|132066|plus.g3721.t1	S10_quant	199.673	13.7992	2429.72	2586
jgi|Phlrad1|132066|plus.g3721.t1	S11_quant	207.905	14.4798	2436.81	2586
jgi|Phlrad1|132066|plus.g3721.t1	S12_quant	180.94	12.4035	2419.82	2586
jgi|Phlrad1|132067|plus.g3722.t1	S07_quant	51.8994	5.9829	1444.64	1608
jgi|Phlrad1|132067|plus.g3722.t1	S08_quant	35.2282	4.08315	1453.32	1608
jgi|Phlrad1|132067|plus.g3722.t1	S09_quant	74.1176	8.5699	1447.15	1608
jgi|Phlrad1|132067|plus.g3722.t1	S10_quant	65.3007	7.55311	1451.72	1608
jgi|Phlrad1|132067|plus.g3722.t1	S11_quant	65.3599	7.60383	1458.81	1608
jgi|Phlrad1|132067|plus.g3722.t1	S12_quant	55.5737	6.39365	1441.82	1608
jgi|Phlrad1|132068|minus.g3685.t1	S07_quant	243.766	71.3911	568.642	732
jgi|Phlrad1|132068|minus.g3685.t1	S08_quant	337.6	98.5038	577.318	732
jgi|Phlrad1|132068|minus.g3685.t1	S09_quant	309.467	90.6631	571.153	732
jgi|Phlrad1|132068|minus.g3685.t1	S10_quant	207.58	60.5436	575.716	732
jgi|Phlrad1|132068|minus.g3685.t1	S11_quant	225.071	65.5408	582.81	732
jgi|Phlrad1|132068|minus.g3685.t1	S12_quant	250.189	73.3467	565.822	732
jgi|Phlrad1|132069|plus.g3724.t1	S07_quant	32.1771	2.1983	2437.64	2601
jgi|Phlrad1|132069|plus.g3724.t1	S08_quant	30.5175	2.10137	2446.32	2601
jgi|Phlrad1|132069|plus.g3724.t1	S09_quant	22.4696	1.5408	2440.15	2601
jgi|Phlrad1|132069|plus.g3724.t1	S10_quant	44.4815	3.05521	2444.72	2601
jgi|Phlrad1|132069|plus.g3724.t1	S11_quant	38.1476	2.64058	2451.81	2601
jgi|Phlrad1|132069|plus.g3724.t1	S12_quant	32.3906	2.2067	2434.82	2601
jgi|Phlrad1|132070|minus.g3687.t1	S07_quant	78.9803	18.5348	709.642	873
jgi|Phlrad1|132070|minus.g3687.t1	S08_quant	93.4599	21.9166	718.318	873
jgi|Phlrad1|132070|minus.g3687.t1	S09_quant	93.9636	22.0778	712.153	873
jgi|Phlrad1|132070|minus.g3687.t1	S10_quant	72.1589	16.9057	716.716	873
jgi|Phlrad1|132070|minus.g3687.t1	S11_quant	66.7583	15.6531	723.81	873
jgi|Phlrad1|132070|minus.g3687.t1	S12_quant	91.5872	21.4939	706.822	873
jgi|Phlrad1|132071|minus.g3688.t1	S07_quant	442.459	56.9157	1294.64	1458
jgi|Phlrad1|132071|minus.g3688.t1	S08_quant	393.924	50.9129	1303.32	1458
jgi|Phlrad1|132071|minus.g3688.t1	S09_quant	430.426	55.5234	1297.15	1458
jgi|Phlrad1|132071|minus.g3688.t1	S10_quant	391.376	50.4857	1301.72	1458
jgi|Phlrad1|132071|minus.g3688.t1	S11_quant	387.643	50.266	1308.81	1458
jgi|Phlrad1|132071|minus.g3688.t1	S12_quant	412.414	52.9569	1291.82	1458
jgi|Phlrad1|132072|plus.g3727.t1	S07_quant	17.5512	8.49396	344.116	507
jgi|Phlrad1|132072|plus.g3727.t1	S08_quant	27.6565	13.2088	352.695	507
jgi|Phlrad1|132072|plus.g3727.t1	S09_quant	9.19209	4.43526	346.789	507
jgi|Phlrad1|132072|plus.g3727.t1	S10_quant	20.758	9.92677	351.13	507
jgi|Phlrad1|132072|plus.g3727.t1	S11_quant	36.2402	17.1686	358.24	507
jgi|Phlrad1|132072|plus.g3727.t1	S12_quant	24.5722	11.9393	341.395	507
jgi|Phlrad1|132073|plus.g3728.t1	S07_quant	13.6509	5.54778	409.781	573
jgi|Phlrad1|132073|plus.g3728.t1	S08_quant	19.0735	7.67966	418.362	573
jgi|Phlrad1|132073|plus.g3728.t1	S09_quant	10.2134	4.14459	412.344	573
jgi|Phlrad1|132073|plus.g3728.t1	S10_quant	17.7926	7.16564	416.941	573
jgi|Phlrad1|132073|plus.g3728.t1	S11_quant	21.9349	8.77904	424.041	573
jgi|Phlrad1|132073|plus.g3728.t1	S12_quant	20.1045	8.19474	406.958	573
jgi|Phlrad1|132074|minus.g3691.t1	S07_quant	180.387	23.9821	1252.64	1416
jgi|Phlrad1|132074|minus.g3691.t1	S08_quant	164.985	22.0336	1261.32	1416
jgi|Phlrad1|132074|minus.g3691.t1	S09_quant	152.18	20.2876	1255.15	1416
jgi|Phlrad1|132074|minus.g3691.t1	S10_quant	164.087	21.8722	1259.72	1416
jgi|Phlrad1|132074|minus.g3691.t1	S11_quant	184.062	24.6588	1266.81	1416
jgi|Phlrad1|132074|minus.g3691.t1	S12_quant	182.057	24.163	1249.82	1416
jgi|Phlrad1|132075|minus.g3692.t1	S07_quant	138.459	12.9061	1786.64	1950
jgi|Phlrad1|132075|minus.g3692.t1	S08_quant	126.838	11.9008	1795.32	1950
jgi|Phlrad1|132075|minus.g3692.t1	S09_quant	98.049	9.1699	1789.15	1950
jgi|Phlrad1|132075|minus.g3692.t1	S10_quant	130.479	12.2145	1793.72	1950
jgi|Phlrad1|132075|minus.g3692.t1	S11_quant	113.489	10.6956	1800.81	1950
jgi|Phlrad1|132075|minus.g3692.t1	S12_quant	130.679	12.152	1783.82	1950
jgi|Phlrad1|132076|plus.g3731.t1	S07_quant	85.8057	28.9445	493.696	657
jgi|Phlrad1|132076|plus.g3731.t1	S08_quant	82.0158	27.5033	502.318	657
jgi|Phlrad1|132076|plus.g3731.t1	S09_quant	75.5794	25.4863	496.21	657
jgi|Phlrad1|132076|plus.g3731.t1	S10_quant	62.2741	20.8815	500.767	657
jgi|Phlrad1|132076|plus.g3731.t1	S11_quant	79.1563	26.452	507.864	657
jgi|Phlrad1|132076|plus.g3731.t1	S12_quant	72.5996	24.5359	490.822	657
jgi|Phlrad1|132077|minus.g3694.t1	S07_quant	90.6811	8.36826	1804.64	1968
jgi|Phlrad1|132077|minus.g3694.t1	S08_quant	66.7571	6.20138	1813.32	1968
jgi|Phlrad1|132077|minus.g3694.t1	S09_quant	98.049	9.07856	1807.15	1968
jgi|Phlrad1|132077|minus.g3694.t1	S10_quant	85.0091	7.87889	1811.72	1968
jgi|Phlrad1|132077|minus.g3694.t1	S11_quant	79.1563	7.38614	1818.81	1968
jgi|Phlrad1|132077|minus.g3694.t1	S12_quant	86.0026	7.91755	1801.82	1968
jgi|Phlrad1|132078|plus.g3733.t1	S07_quant	84.8307	31.4855	448.696	612
jgi|Phlrad1|132078|plus.g3733.t1	S08_quant	108.719	40.0453	457.318	612
jgi|Phlrad1|132078|plus.g3733.t1	S09_quant	99.0703	36.7357	451.257	612
jgi|Phlrad1|132078|plus.g3733.t1	S10_quant	80.0667	29.4984	455.767	612
jgi|Phlrad1|132078|plus.g3733.t1	S11_quant	76.2952	27.9718	462.91	612
jgi|Phlrad1|132078|plus.g3733.t1	S12_quant	108.341	40.3024	445.915	612
jgi|Phlrad1|132079|plus.g3734.t1	S07_quant	380.275	54.7531	1156.64	1320
jgi|Phlrad1|132079|plus.g3734.t1	S08_quant	322.341	46.5947	1165.32	1320
jgi|Phlrad1|132079|plus.g3734.t1	S09_quant	367.684	53.0765	1159.15	1320
jgi|Phlrad1|132079|plus.g3734.t1	S10_quant	242.177	34.9443	1163.72	1320
jgi|Phlrad1|132079|plus.g3734.t1	S11_quant	232.7	33.7311	1170.81	1320
jgi|Phlrad1|132079|plus.g3734.t1	S12_quant	294.866	42.3914	1153.82	1320
jgi|Phlrad1|132080|plus.g3735.t1	S07_quant	90.6811	12.599	1198.64	1362
jgi|Phlrad1|132080|plus.g3735.t1	S08_quant	83.9232	11.7092	1207.32	1362
jgi|Phlrad1|132080|plus.g3735.t1	S09_quant	104.177	14.5125	1201.15	1362
jgi|Phlrad1|132080|plus.g3735.t1	S10_quant	35.5852	4.95581	1205.72	1362
jgi|Phlrad1|132080|plus.g3735.t1	S11_quant	52.453	7.34001	1212.81	1362
jgi|Phlrad1|132080|plus.g3735.t1	S12_quant	61.4304	8.52135	1195.82	1362
jgi|Phlrad1|132081|plus.g3736.t1	S07_quant	52.6535	7.68081	1141.64	1305
jgi|Phlrad1|132081|plus.g3736.t1	S08_quant	63.8961	9.35667	1150.32	1305
jgi|Phlrad1|132081|plus.g3736.t1	S09_quant	72.5154	10.6051	1144.15	1305
jgi|Phlrad1|132081|plus.g3736.t1	S10_quant	38.5507	5.63519	1148.72	1305
jgi|Phlrad1|132081|plus.g3736.t1	S11_quant	41.0087	6.02156	1155.81	1305
jgi|Phlrad1|132081|plus.g3736.t1	S12_quant	51.3782	7.48366	1138.82	1305
jgi|Phlrad1|132082|plus.g3737.t1	S07_quant	265.218	23.7638	1858.64	2022
jgi|Phlrad1|132082|plus.g3737.t1	S08_quant	306.129	27.6154	1867.32	2022
jgi|Phlrad1|132082|plus.g3737.t1	S09_quant	310.488	27.9147	1861.15	2022
jgi|Phlrad1|132082|plus.g3737.t1	S10_quant	295.555	26.6001	1865.72	2022
jgi|Phlrad1|132082|plus.g3737.t1	S11_quant	349.051	31.6311	1872.81	2022
jgi|Phlrad1|132082|plus.g3737.t1	S12_quant	301.567	26.955	1855.82	2022
jgi|Phlrad1|132083|minus.g3698.t1	S07_quant	554.812	69.5944	1327.64	1491
jgi|Phlrad1|132083|minus.g3698.t1	S08_quant	589.277	74.2806	1336.32	1491
jgi|Phlrad1|132083|minus.g3698.t1	S09_quant	438.156	55.1184	1330.15	1491
jgi|Phlrad1|132083|minus.g3698.t1	S10_quant	494.239	62.1782	1334.72	1491
jgi|Phlrad1|132083|minus.g3698.t1	S11_quant	558.863	70.686	1341.81	1491
jgi|Phlrad1|132083|minus.g3698.t1	S12_quant	503.613	63.0567	1324.82	1491
jgi|Phlrad1|132084|minus.g3699.t1	S07_quant	72.1548	8.44061	1423.64	1587
jgi|Phlrad1|132084|minus.g3699.t1	S08_quant	67.8032	7.974	1432.32	1587
jgi|Phlrad1|132084|minus.g3699.t1	S09_quant	61.2806	7.18995	1426.15	1587
jgi|Phlrad1|132084|minus.g3699.t1	S10_quant	76.1128	8.93294	1430.72	1587
jgi|Phlrad1|132084|minus.g3699.t1	S11_quant	79.1563	9.34337	1437.81	1587
jgi|Phlrad1|132084|minus.g3699.t1	S12_quant	62.6634	7.31587	1420.82	1587
jgi|Phlrad1|132085|minus.g3700.t1	S07_quant	276.918	19.8983	2317.64	2481
jgi|Phlrad1|132085|minus.g3700.t1	S08_quant	293.731	21.269	2326.32	2481
jgi|Phlrad1|132085|minus.g3700.t1	S09_quant	329.894	23.7918	2320.15	2481
jgi|Phlrad1|132085|minus.g3700.t1	S10_quant	292.59	21.1339	2324.72	2481
jgi|Phlrad1|132085|minus.g3700.t1	S11_quant	283.246	20.6153	2331.81	2481
jgi|Phlrad1|132085|minus.g3700.t1	S12_quant	276.995	19.8494	2314.82	2481
jgi|Phlrad1|132086|minus.g3701.t1	S07_quant	58.5039	7.98844	1219.64	1383
jgi|Phlrad1|132086|minus.g3701.t1	S08_quant	80.1085	10.9858	1228.32	1383
jgi|Phlrad1|132086|minus.g3701.t1	S09_quant	73.5367	10.0681	1222.15	1383
jgi|Phlrad1|132086|minus.g3701.t1	S10_quant	70.182	9.60664	1226.72	1383
jgi|Phlrad1|132086|minus.g3701.t1	S11_quant	77.2489	10.6258	1233.81	1383
jgi|Phlrad1|132086|minus.g3701.t1	S12_quant	82.6518	11.2672	1216.82	1383
jgi|Phlrad1|132087|plus.g3741.t1	S07_quant	923.387	27.3448	5623.64	5787
jgi|Phlrad1|132087|plus.g3741.t1	S08_quant	1004.22	30.0335	5632.32	5787
jgi|Phlrad1|132087|plus.g3741.t1	S09_quant	1014.19	30.1633	5626.15	5787
jgi|Phlrad1|132087|plus.g3741.t1	S10_quant	1407.59	41.9762	5630.72	5787
jgi|Phlrad1|132087|plus.g3741.t1	S11_quant	1190.21	35.8287	5637.81	5787
jgi|Phlrad1|132087|plus.g3741.t1	S12_quant	929.275	27.4243	5620.82	5787
jgi|Phlrad1|132088|plus.g3742.t1	S07_quant	82.9616	13.1003	1054.64	1218
jgi|Phlrad1|132088|plus.g3742.t1	S08_quant	22.6085	3.58157	1063.32	1218
jgi|Phlrad1|132088|plus.g3742.t1	S09_quant	46.6103	7.37756	1057.15	1218
jgi|Phlrad1|132088|plus.g3742.t1	S10_quant	96.5834	15.2751	1061.72	1218
jgi|Phlrad1|132088|plus.g3742.t1	S11_quant	83.3634	13.2371	1068.81	1218
jgi|Phlrad1|132088|plus.g3742.t1	S12_quant	77.5602	12.2317	1051.82	1218
jgi|Phlrad1|132089|plus.g3742.t2	S07_quant	84.7496	13.5757	1039.64	1203
jgi|Phlrad1|132089|plus.g3742.t2	S08_quant	120.442	19.3532	1048.32	1203
jgi|Phlrad1|132089|plus.g3742.t2	S09_quant	105.57	16.9503	1042.15	1203
jgi|Phlrad1|132089|plus.g3742.t2	S10_quant	207.868	33.3464	1046.72	1203
jgi|Phlrad1|132089|plus.g3742.t2	S11_quant	194.16	31.2693	1053.81	1203
jgi|Phlrad1|132089|plus.g3742.t2	S12_quant	219.54	35.1237	1036.82	1203
jgi|Phlrad1|132090|minus.g3704.t1	S07_quant	22.4265	17.796	209.87	369
jgi|Phlrad1|132090|minus.g3704.t1	S08_quant	26.7028	20.5666	218.706	369
jgi|Phlrad1|132090|minus.g3704.t1	S09_quant	35.747	28.0095	213.552	369
jgi|Phlrad1|132090|minus.g3704.t1	S10_quant	36.5737	28.4304	216.011	369
jgi|Phlrad1|132090|minus.g3704.t1	S11_quant	31.4718	23.8677	223.784	369
jgi|Phlrad1|132090|minus.g3704.t1	S12_quant	43.5597	34.8231	207.496	369
jgi|Phlrad1|132091|plus.g3743.t1	S07_quant	229.14	22.8553	1669.64	1833
jgi|Phlrad1|132091|plus.g3743.t1	S08_quant	229.835	23.0679	1678.32	1833
jgi|Phlrad1|132091|plus.g3743.t1	S09_quant	228.781	22.8935	1672.15	1833
jgi|Phlrad1|132091|plus.g3743.t1	S10_quant	303.463	30.3904	1676.72	1833
jgi|Phlrad1|132091|plus.g3743.t1	S11_quant	306.135	30.8559	1683.81	1833
jgi|Phlrad1|132091|plus.g3743.t1	S12_quant	285.931	28.4553	1666.82	1833
jgi|Phlrad1|132092|minus.g3706.t1	S07_quant	52.6535	7.35236	1192.64	1356
jgi|Phlrad1|132092|minus.g3706.t1	S08_quant	44.8226	6.28499	1201.32	1356
jgi|Phlrad1|132092|minus.g3706.t1	S09_quant	56.1739	7.86466	1195.15	1356
jgi|Phlrad1|132092|minus.g3706.t1	S10_quant	51.4009	7.19419	1199.72	1356
jgi|Phlrad1|132092|minus.g3706.t1	S11_quant	37.1939	5.23061	1206.81	1356
jgi|Phlrad1|132092|minus.g3706.t1	S12_quant	52.4951	7.3186	1189.82	1356
jgi|Phlrad1|132093|plus.g3745.t1	S07_quant	178.437	22.0342	1348.64	1512
jgi|Phlrad1|132093|plus.g3745.t1	S08_quant	205.04	25.4461	1357.32	1512
jgi|Phlrad1|132093|plus.g3745.t1	S09_quant	218.568	27.0676	1351.15	1512
jgi|Phlrad1|132093|plus.g3745.t1	S10_quant	171.995	21.3028	1355.72	1512
jgi|Phlrad1|132093|plus.g3745.t1	S11_quant	196.46	24.4658	1362.81	1512
jgi|Phlrad1|132093|plus.g3745.t1	S12_quant	187.642	23.1278	1345.82	1512
jgi|Phlrad1|132094|minus.g3708.t1	S07_quant	696.196	37.3929	3100.64	3264
jgi|Phlrad1|132094|minus.g3708.t1	S08_quant	701.903	38.0257	3109.32	3264
jgi|Phlrad1|132094|minus.g3708.t1	S09_quant	774.178	41.7452	3103.15	3264
jgi|Phlrad1|132094|minus.g3708.t1	S10_quant	827.356	44.7035	3107.72	3264
jgi|Phlrad1|132094|minus.g3708.t1	S11_quant	739.11	40.2714	3114.81	3264
jgi|Phlrad1|132094|minus.g3708.t1	S12_quant	721.528	38.6357	3097.82	3264
jgi|Phlrad1|132095|plus.g3747.t1	S07_quant	48.7533	10.4677	775.642	939
jgi|Phlrad1|132095|plus.g3747.t1	S08_quant	78.2012	16.7952	784.318	939
jgi|Phlrad1|132095|plus.g3747.t1	S09_quant	57.1952	12.2988	778.153	939
jgi|Phlrad1|132095|plus.g3747.t1	S10_quant	62.2741	13.3596	782.716	939
jgi|Phlrad1|132095|plus.g3747.t1	S11_quant	70.5731	15.1648	789.81	939
jgi|Phlrad1|132095|plus.g3747.t1	S12_quant	60.3135	12.9457	772.822	939
jgi|Phlrad1|132096|minus.g3710.t1	S07_quant	195.013	36.0196	901.642	1065
jgi|Phlrad1|132096|minus.g3710.t1	S08_quant	222.206	41.1176	910.318	1065
jgi|Phlrad1|132096|minus.g3710.t1	S09_quant	223.674	41.3945	904.153	1065
jgi|Phlrad1|132096|minus.g3710.t1	S10_quant	231.304	42.741	908.716	1065
jgi|Phlrad1|132096|minus.g3710.t1	S11_quant	224.117	41.5326	915.81	1065
jgi|Phlrad1|132096|minus.g3710.t1	S12_quant	222.266	41.0196	898.822	1065
jgi|Phlrad1|132097|plus.g3749.t1	S07_quant	117.008	57.1072	341.219	504
jgi|Phlrad1|132097|plus.g3749.t1	S08_quant	110.626	53.2725	349.8	504
jgi|Phlrad1|132097|plus.g3749.t1	S09_quant	104.177	50.7049	343.789	504
jgi|Phlrad1|132097|plus.g3749.t1	S10_quant	116.64	56.2596	348.13	504
jgi|Phlrad1|132097|plus.g3749.t1	S11_quant	95.369	45.5576	355.276	504
jgi|Phlrad1|132097|plus.g3749.t1	S12_quant	99.4056	48.723	338.429	504
jgi|Phlrad1|132098|minus.g3711.t2	S07_quant	610.391	29.5017	3445.64	3609
jgi|Phlrad1|132098|minus.g3711.t2	S08_quant	501.637	24.462	3454.32	3609
jgi|Phlrad1|132098|minus.g3711.t2	S09_quant	478.106	23.201	3448.15	3609
jgi|Phlrad1|132098|minus.g3711.t2	S10_quant	452.257	21.9945	3452.72	3609
jgi|Phlrad1|132098|minus.g3711.t2	S11_quant	486.494	23.8641	3459.81	3609
jgi|Phlrad1|132098|minus.g3711.t2	S12_quant	487.69	23.4974	3442.82	3609
jgi|Phlrad1|132099|minus.g3711.t1	S07_quant	0	0	3427.64	3591
jgi|Phlrad1|132099|minus.g3711.t1	S08_quant	42.91	2.10344	3436.32	3591
jgi|Phlrad1|132099|minus.g3711.t1	S09_quant	74.441	3.63135	3430.15	3591
jgi|Phlrad1|132099|minus.g3711.t1	S10_quant	54.8328	2.68064	3434.72	3591
jgi|Phlrad1|132099|minus.g3711.t1	S11_quant	47.5731	2.34581	3441.81	3591
jgi|Phlrad1|132099|minus.g3711.t1	S12_quant	64.0671	3.10305	3424.82	3591
jgi|Phlrad1|132100|plus.g3751.t1	S07_quant	168.686	24.3511	1153.64	1317
jgi|Phlrad1|132100|plus.g3751.t1	S08_quant	191.688	27.7802	1162.32	1317
jgi|Phlrad1|132100|plus.g3751.t1	S09_quant	184.863	26.7549	1156.15	1317
jgi|Phlrad1|132100|plus.g3751.t1	S10_quant	178.915	25.8827	1160.72	1317
jgi|Phlrad1|132100|plus.g3751.t1	S11_quant	185.97	27.0265	1167.81	1317
jgi|Phlrad1|132100|plus.g3751.t1	S12_quant	161.953	23.3438	1150.82	1317
jgi|Phlrad1|132101|minus.g3713.t1	S07_quant	596.74	74.0175	1342.64	1506
jgi|Phlrad1|132101|minus.g3713.t1	S08_quant	538.825	67.1669	1351.32	1506
jgi|Phlrad1|132101|minus.g3713.t1	S09_quant	500.458	62.2537	1345.15	1506
jgi|Phlrad1|132101|minus.g3713.t1	S10_quant	556.513	69.2346	1349.72	1506
jgi|Phlrad1|132101|minus.g3713.t1	S11_quant	663.769	83.0265	1356.81	1506
jgi|Phlrad1|132101|minus.g3713.t1	S12_quant	660.098	81.7246	1339.82	1506
jgi|Phlrad1|132102|plus.g3754.t1	S07_quant	3.90026	8.25058	78.7261	213
jgi|Phlrad1|132102|plus.g3754.t1	S08_quant	0.953673	1.80416	89.0408	213
jgi|Phlrad1|132102|plus.g3754.t1	S09_quant	1.02134	1.99173	85.8044	213
jgi|Phlrad1|132102|plus.g3754.t1	S10_quant	0	0	81.7864	213
jgi|Phlrad1|132102|plus.g3754.t1	S11_quant	0	0	92.5579	213
jgi|Phlrad1|132102|plus.g3754.t1	S12_quant	0	0	80.0216	213
jgi|Phlrad1|132103|plus.g3755.t1	S07_quant	115.058	30.9232	619.642	783
jgi|Phlrad1|132103|plus.g3755.t1	S08_quant	124.931	33.4932	628.318	783
jgi|Phlrad1|132103|plus.g3755.t1	S09_quant	123.583	33.2375	622.153	783
jgi|Phlrad1|132103|plus.g3755.t1	S10_quant	85.0091	22.7764	626.716	783
jgi|Phlrad1|132103|plus.g3755.t1	S11_quant	97.2764	26.0476	633.81	783
jgi|Phlrad1|132103|plus.g3755.t1	S12_quant	116.159	31.2382	616.822	783
jgi|Phlrad1|132104|plus.g3756.t1	S07_quant	510.934	54.5919	1558.64	1722
jgi|Phlrad1|132104|plus.g3756.t1	S08_quant	473.022	50.8381	1567.32	1722
jgi|Phlrad1|132104|plus.g3756.t1	S09_quant	444.284	47.6195	1561.15	1722
jgi|Phlrad1|132104|plus.g3756.t1	S10_quant	400.334	42.9338	1565.72	1722
jgi|Phlrad1|132104|plus.g3756.t1	S11_quant	445.373	48.0582	1572.81	1722
jgi|Phlrad1|132104|plus.g3756.t1	S12_quant	400.973	42.7511	1555.82	1722
jgi|Phlrad1|132105|plus.g3757.t1	S07_quant	39.9777	4.81872	1381.64	1545
jgi|Phlrad1|132105|plus.g3757.t1	S08_quant	45.7763	5.54615	1390.32	1545
jgi|Phlrad1|132105|plus.g3757.t1	S09_quant	58.2166	7.03771	1384.15	1545
jgi|Phlrad1|132105|plus.g3757.t1	S10_quant	56.3433	6.81269	1388.72	1545
jgi|Phlrad1|132105|plus.g3757.t1	S11_quant	32.4255	3.94257	1395.81	1545
jgi|Phlrad1|132105|plus.g3757.t1	S12_quant	34.6244	4.16549	1378.82	1545
jgi|Phlrad1|132106|plus.g3758.t1	S07_quant	129.684	15.803	1366.64	1530
jgi|Phlrad1|132106|plus.g3758.t1	S08_quant	108.719	13.3158	1375.32	1530
jgi|Phlrad1|132106|plus.g3758.t1	S09_quant	175.671	21.4693	1369.15	1530
jgi|Phlrad1|132106|plus.g3758.t1	S10_quant	86.9861	10.6327	1373.72	1530
jgi|Phlrad1|132106|plus.g3758.t1	S11_quant	77.2489	9.49463	1380.81	1530
jgi|Phlrad1|132106|plus.g3758.t1	S12_quant	94.9379	11.5471	1363.82	1530
jgi|Phlrad1|132107|plus.g3759.t1	S07_quant	130.659	16.8073	1294.64	1458
jgi|Phlrad1|132107|plus.g3759.t1	S08_quant	132.56	17.1328	1303.32	1458
jgi|Phlrad1|132107|plus.g3759.t1	S09_quant	144.009	18.5767	1297.15	1458
jgi|Phlrad1|132107|plus.g3759.t1	S10_quant	107.744	13.8985	1301.72	1458
jgi|Phlrad1|132107|plus.g3759.t1	S11_quant	100.137	12.9849	1308.81	1458
jgi|Phlrad1|132107|plus.g3759.t1	S12_quant	83.7687	10.7565	1291.82	1458
jgi|Phlrad1|132108|plus.g3760.t1	S07_quant	357.849	45.2972	1315.64	1479
jgi|Phlrad1|132108|plus.g3760.t1	S08_quant	239.372	30.4471	1324.32	1479
jgi|Phlrad1|132108|plus.g3760.t1	S09_quant	245.122	31.1162	1318.15	1479
jgi|Phlrad1|132108|plus.g3760.t1	S10_quant	220.431	27.9831	1322.72	1479
jgi|Phlrad1|132108|plus.g3760.t1	S11_quant	200.275	25.5597	1329.81	1479
jgi|Phlrad1|132108|plus.g3760.t1	S12_quant	180.94	22.8624	1312.82	1479
jgi|Phlrad1|132109|minus.g3720.t1	S07_quant	40.9527	7.61479	895.642	1059
jgi|Phlrad1|132109|minus.g3720.t1	S08_quant	46.73	8.70441	904.318	1059
jgi|Phlrad1|132109|minus.g3720.t1	S09_quant	31.6617	5.89864	898.153	1059
jgi|Phlrad1|132109|minus.g3720.t1	S10_quant	43.493	8.09019	902.716	1059
jgi|Phlrad1|132109|minus.g3720.t1	S11_quant	35.2865	6.5823	909.81	1059
jgi|Phlrad1|132109|minus.g3720.t1	S12_quant	33.5075	6.22542	892.822	1059
jgi|Phlrad1|132110|minus.g3721.t1	S07_quant	7.15985	8.25991	144.357	297
jgi|Phlrad1|132110|minus.g3721.t1	S08_quant	11.4441	12.5292	153.859	297
jgi|Phlrad1|132110|minus.g3721.t1	S09_quant	1.74369	1.94589	149.941	297
jgi|Phlrad1|132110|minus.g3721.t1	S10_quant	3.75617	4.2248	149.29	297
jgi|Phlrad1|132110|minus.g3721.t1	S11_quant	2.37112	2.54038	158.407	297
jgi|Phlrad1|132110|minus.g3721.t1	S12_quant	5.23756	6.07807	142.94	297
jgi|Phlrad1|132111|minus.g3721.t2	S07_quant	4.54093	9.36731	80.7309	216
jgi|Phlrad1|132111|minus.g3721.t2	S08_quant	4.80225e-08	8.87376e-08	91.1596	216
jgi|Phlrad1|132111|minus.g3721.t2	S09_quant	10.5124	20.065	87.6666	216
jgi|Phlrad1|132111|minus.g3721.t2	S10_quant	3.16317	6.33778	83.8062	216
jgi|Phlrad1|132111|minus.g3721.t2	S11_quant	3.35102	6.00586	94.6938	216
jgi|Phlrad1|132111|minus.g3721.t2	S12_quant	5.9316	12.0026	81.976	216
jgi|Phlrad1|132112|minus.g3722.t1	S07_quant	6.85114	1.60104	712.642	876
jgi|Phlrad1|132112|minus.g3722.t1	S08_quant	13.396	3.12834	721.318	876
jgi|Phlrad1|132112|minus.g3722.t1	S09_quant	19.5322	4.57004	715.153	876
jgi|Phlrad1|132112|minus.g3722.t1	S10_quant	21.907	5.11107	719.716	876
jgi|Phlrad1|132112|minus.g3722.t1	S11_quant	37.7804	8.82195	726.81	876
jgi|Phlrad1|132112|minus.g3722.t1	S12_quant	19.107	4.46512	709.822	876
jgi|Phlrad1|132113|minus.g3723.t1	S07_quant	508.958	119.948	706.642	870
jgi|Phlrad1|132113|minus.g3723.t1	S08_quant	554.993	130.693	715.318	870
jgi|Phlrad1|132113|minus.g3723.t1	S09_quant	449.265	106.006	709.153	870
jgi|Phlrad1|132113|minus.g3723.t1	S10_quant	647.293	152.288	713.716	870
jgi|Phlrad1|132113|minus.g3723.t1	S11_quant	693.7	163.332	720.81	870
jgi|Phlrad1|132113|minus.g3723.t1	S12_quant	690.135	162.653	703.822	870
jgi|Phlrad1|132114|plus.g3764.t1	S07_quant	27.3018	14.5987	311.45	474
jgi|Phlrad1|132114|plus.g3764.t1	S08_quant	23.8418	12.5465	320.098	474
jgi|Phlrad1|132114|plus.g3764.t1	S09_quant	25.5336	13.5959	314.249	474
jgi|Phlrad1|132114|plus.g3764.t1	S10_quant	26.6889	14.0796	318.295	474
jgi|Phlrad1|132114|plus.g3764.t1	S11_quant	20.9812	10.931	325.754	474
jgi|Phlrad1|132114|plus.g3764.t1	S12_quant	25.6891	13.7888	309.039	474
jgi|Phlrad1|132115|plus.g3765.t1	S07_quant	48.7533	7.7648	1045.64	1209
jgi|Phlrad1|132115|plus.g3765.t1	S08_quant	42.9153	6.85655	1054.32	1209
jgi|Phlrad1|132115|plus.g3765.t1	S09_quant	36.7684	5.86974	1048.15	1209
jgi|Phlrad1|132115|plus.g3765.t1	S10_quant	59.3087	9.46013	1052.72	1209
jgi|Phlrad1|132115|plus.g3765.t1	S11_quant	109.674	17.5629	1059.81	1209
jgi|Phlrad1|132115|plus.g3765.t1	S12_quant	82.6518	13.1472	1042.82	1209
jgi|Phlrad1|132116|minus.g3725.t1	S07_quant	1563.03	85.523	3043.64	3207
jgi|Phlrad1|132116|minus.g3725.t1	S08_quant	1494.4	82.4715	3052.32	3207
jgi|Phlrad1|132116|minus.g3725.t1	S09_quant	1476.86	81.1255	3046.15	3207
jgi|Phlrad1|132116|minus.g3725.t1	S10_quant	1577.61	86.8337	3050.72	3207
jgi|Phlrad1|132116|minus.g3725.t1	S11_quant	1717.6	95.3301	3057.81	3207
jgi|Phlrad1|132116|minus.g3725.t1	S12_quant	1821.69	99.3746	3040.82	3207
jgi|Phlrad1|132117|minus.g3726.t1	S07_quant	60.454	11.8355	850.642	1014
jgi|Phlrad1|132117|minus.g3726.t1	S08_quant	61.035	11.9644	859.318	1014
jgi|Phlrad1|132117|minus.g3726.t1	S09_quant	65.366	12.8202	853.153	1014
jgi|Phlrad1|132117|minus.g3726.t1	S10_quant	152.226	29.8012	857.716	1014
jgi|Phlrad1|132117|minus.g3726.t1	S11_quant	141.146	27.6992	864.81	1014
jgi|Phlrad1|132117|minus.g3726.t1	S12_quant	104.99	20.5417	847.822	1014
jgi|Phlrad1|132118|minus.g3727.t1	S07_quant	97.5065	19.2937	841.642	1005
jgi|Phlrad1|132118|minus.g3727.t1	S08_quant	95.3673	18.8922	850.318	1005
jgi|Phlrad1|132118|minus.g3727.t1	S09_quant	90.8996	18.0181	844.153	1005
jgi|Phlrad1|132118|minus.g3727.t1	S10_quant	77.1013	15.2542	848.716	1005
jgi|Phlrad1|132118|minus.g3727.t1	S11_quant	90.6006	17.9669	855.81	1005
jgi|Phlrad1|132118|minus.g3727.t1	S12_quant	83.7687	16.5655	838.822	1005
jgi|Phlrad1|132119|plus.g3769.t1	S07_quant	21.4514	34.8591	102.483	246
jgi|Phlrad1|132119|plus.g3769.t1	S08_quant	27.6565	41.3626	112.63	246
jgi|Phlrad1|132119|plus.g3769.t1	S09_quant	14.2988	21.9782	108.862	246
jgi|Phlrad1|132119|plus.g3769.t1	S10_quant	33.6083	53.0399	106.398	246
jgi|Phlrad1|132119|plus.g3769.t1	S11_quant	18.1201	26.3775	116.586	246
jgi|Phlrad1|132119|plus.g3769.t1	S12_quant	13.403	21.7011	102.45	246
jgi|Phlrad1|132120|plus.g3770.t1	S07_quant	20.4764	22.4016	152.224	306
jgi|Phlrad1|132120|plus.g3770.t1	S08_quant	9.53673	9.94274	161.569	306
jgi|Phlrad1|132120|plus.g3770.t1	S09_quant	10.2134	10.8483	157.535	306
jgi|Phlrad1|132120|plus.g3770.t1	S10_quant	7.90783	8.4464	157.208	306
jgi|Phlrad1|132120|plus.g3770.t1	S11_quant	10.4906	10.7158	166.148	306
jgi|Phlrad1|132120|plus.g3770.t1	S12_quant	4.46767	4.91716	150.715	306
jgi|Phlrad1|132121|plus.g3771.t1	S07_quant	17.5512	13.9273	209.87	369
jgi|Phlrad1|132121|plus.g3771.t1	S08_quant	29.5638	22.7701	218.706	369
jgi|Phlrad1|132121|plus.g3771.t1	S09_quant	27.5763	21.6073	213.552	369
jgi|Phlrad1|132121|plus.g3771.t1	S10_quant	14.8272	11.5258	216.011	369
jgi|Phlrad1|132121|plus.g3771.t1	S11_quant	22.8886	17.3584	223.784	369
jgi|Phlrad1|132121|plus.g3771.t1	S12_quant	20.1045	16.0722	207.496	369
jgi|Phlrad1|132122|plus.g3772.t1	S07_quant	782.977	34.3446	3796.64	3960
jgi|Phlrad1|132122|plus.g3772.t1	S08_quant	929.831	41.1603	3805.32	3960
jgi|Phlrad1|132122|plus.g3772.t1	S09_quant	977.426	43.0493	3799.15	3960
jgi|Phlrad1|132122|plus.g3772.t1	S10_quant	902.481	39.84	3803.72	3960
jgi|Phlrad1|132122|plus.g3772.t1	S11_quant	941.292	41.9205	3810.81	3960
jgi|Phlrad1|132122|plus.g3772.t1	S12_quant	886.832	38.7754	3793.82	3960
jgi|Phlrad1|132123|minus.g3729.t1	S07_quant	159.911	23.9564	1111.64	1275
jgi|Phlrad1|132123|minus.g3729.t1	S08_quant	143.051	21.5087	1120.32	1275
jgi|Phlrad1|132123|minus.g3729.t1	S09_quant	156.266	23.4686	1114.15	1275
jgi|Phlrad1|132123|minus.g3729.t1	S10_quant	169.03	25.3707	1118.72	1275
jgi|Phlrad1|132123|minus.g3729.t1	S11_quant	175.479	26.4533	1125.81	1275
jgi|Phlrad1|132123|minus.g3729.t1	S12_quant	158.602	23.7268	1108.82	1275
jgi|Phlrad1|132124|minus.g3730.t1	S07_quant	0	0	877.642	1041
jgi|Phlrad1|132124|minus.g3730.t1	S08_quant	0	0	886.318	1041
jgi|Phlrad1|132124|minus.g3730.t1	S09_quant	0	0	880.153	1041
jgi|Phlrad1|132124|minus.g3730.t1	S10_quant	0	0	884.716	1041
jgi|Phlrad1|132124|minus.g3730.t1	S11_quant	0	0	891.81	1041
jgi|Phlrad1|132124|minus.g3730.t1	S12_quant	0	0	874.822	1041
jgi|Phlrad1|132125|minus.g3731.t1	S07_quant	21.4514	4.58805	778.642	942
jgi|Phlrad1|132125|minus.g3731.t1	S08_quant	19.0735	4.08079	787.318	942
jgi|Phlrad1|132125|minus.g3731.t1	S09_quant	24.5122	5.25068	781.153	942
jgi|Phlrad1|132125|minus.g3731.t1	S10_quant	16.8041	3.59121	785.716	942
jgi|Phlrad1|132125|minus.g3731.t1	S11_quant	12.398	2.654	792.81	942
jgi|Phlrad1|132125|minus.g3731.t1	S12_quant	7.81842	1.67166	775.822	942
jgi|Phlrad1|132126|plus.g3776.t1	S07_quant	344.21	10.4383	5491.64	5655
jgi|Phlrad1|132126|plus.g3776.t1	S08_quant	371.914	11.3899	5500.32	5655
jgi|Phlrad1|132126|plus.g3776.t1	S09_quant	391.074	11.9104	5494.15	5655
jgi|Phlrad1|132126|plus.g3776.t1	S10_quant	369.915	11.2961	5498.72	5655
jgi|Phlrad1|132126|plus.g3776.t1	S11_quant	316.676	9.76142	5505.81	5655
jgi|Phlrad1|132126|plus.g3776.t1	S12_quant	317.227	9.58698	5488.82	5655
jgi|Phlrad1|132127|minus.g3733.t1	S07_quant	24.3766	28.6424	141.734	294
jgi|Phlrad1|132127|minus.g3733.t1	S08_quant	25.4758	28.34	151.423	294
jgi|Phlrad1|132127|minus.g3733.t1	S09_quant	15.9361	18.0963	147.354	294
jgi|Phlrad1|132127|minus.g3733.t1	S10_quant	26.6889	30.5601	146.644	294
jgi|Phlrad1|132127|minus.g3733.t1	S11_quant	20.0275	21.8112	155.835	294
jgi|Phlrad1|132127|minus.g3733.t1	S12_quant	14.5199	17.1504	140.437	294
jgi|Phlrad1|132128|minus.g3734.t1	S07_quant	25.3397	10.3741	406.781	570
jgi|Phlrad1|132128|minus.g3734.t1	S08_quant	19.3647	7.85324	415.362	570
jgi|Phlrad1|132128|minus.g3734.t1	S09_quant	29.1039	11.8969	409.344	570
jgi|Phlrad1|132128|minus.g3734.t1	S10_quant	19.5457	7.92792	413.983	570
jgi|Phlrad1|132128|minus.g3734.t1	S11_quant	23.7916	9.59	421.041	570
jgi|Phlrad1|132128|minus.g3734.t1	S12_quant	14.4977	5.95326	403.958	570
jgi|Phlrad1|132129|plus.g3777.t1	S07_quant	324.697	123.825	436.696	600
jgi|Phlrad1|132129|plus.g3777.t1	S08_quant	336.646	127.341	445.318	600
jgi|Phlrad1|132129|plus.g3777.t1	S09_quant	405.473	154.459	439.257	600
jgi|Phlrad1|132129|plus.g3777.t1	S10_quant	432.91	163.807	443.767	600
jgi|Phlrad1|132129|plus.g3777.t1	S11_quant	332.838	125.274	450.91	600
jgi|Phlrad1|132129|plus.g3777.t1	S12_quant	352.946	134.926	433.915	600
jgi|Phlrad1|132130|minus.g3737.t1	S07_quant	52.6535	5.81619	1507.64	1671
jgi|Phlrad1|132130|minus.g3737.t1	S08_quant	41.0079	4.55557	1516.32	1671
jgi|Phlrad1|132130|minus.g3737.t1	S09_quant	41.8751	4.63985	1510.15	1671
jgi|Phlrad1|132130|minus.g3737.t1	S10_quant	41.5161	4.6023	1514.72	1671
jgi|Phlrad1|132130|minus.g3737.t1	S11_quant	46.7308	5.2115	1521.81	1671
jgi|Phlrad1|132130|minus.g3737.t1	S12_quant	39.0921	4.30919	1504.82	1671
jgi|Phlrad1|132131|plus.g3779.t1	S07_quant	246.691	53.5884	766.642	930
jgi|Phlrad1|132131|plus.g3779.t1	S08_quant	210.762	45.7907	775.318	930
jgi|Phlrad1|132131|plus.g3779.t1	S09_quant	226.738	49.3266	769.153	930
jgi|Phlrad1|132131|plus.g3779.t1	S10_quant	221.419	48.0533	773.716	930
jgi|Phlrad1|132131|plus.g3779.t1	S11_quant	266.08	57.8343	780.81	930
jgi|Phlrad1|132131|plus.g3779.t1	S12_quant	242.371	52.6356	763.822	930
jgi|Phlrad1|132132|minus.g3739.t1	S07_quant	158.936	27.6105	958.642	1122
jgi|Phlrad1|132132|minus.g3739.t1	S08_quant	112.533	19.5964	967.318	1122
jgi|Phlrad1|132132|minus.g3739.t1	S09_quant	112.348	19.5587	961.153	1122
jgi|Phlrad1|132132|minus.g3739.t1	S10_quant	117.629	20.4529	965.716	1122
jgi|Phlrad1|132132|minus.g3739.t1	S11_quant	119.211	20.7974	972.81	1122
jgi|Phlrad1|132132|minus.g3739.t1	S12_quant	122.861	21.322	955.822	1122
jgi|Phlrad1|132133|minus.g3740.t1	S07_quant	38.0275	4.4958	1408.64	1572
jgi|Phlrad1|132133|minus.g3740.t1	S08_quant	50.5446	6.00722	1417.32	1572
jgi|Phlrad1|132133|minus.g3740.t1	S09_quant	42.8964	5.08646	1411.15	1572
jgi|Phlrad1|132133|minus.g3740.t1	S10_quant	54.3663	6.44827	1415.72	1572
jgi|Phlrad1|132133|minus.g3740.t1	S11_quant	44.8234	5.3466	1422.81	1572
jgi|Phlrad1|132133|minus.g3740.t1	S12_quant	35.7413	4.21727	1405.82	1572
jgi|Phlrad1|132134|minus.g3741.t1	S07_quant	203.789	113.232	299.723	462
jgi|Phlrad1|132134|minus.g3741.t1	S08_quant	244.14	133.412	308.256	462
jgi|Phlrad1|132134|minus.g3741.t1	S09_quant	347.257	192.088	302.495	462
jgi|Phlrad1|132134|minus.g3741.t1	S10_quant	1120.93	614.138	306.482	462
jgi|Phlrad1|132134|minus.g3741.t1	S11_quant	639.926	346.041	313.849	462
jgi|Phlrad1|132134|minus.g3741.t1	S12_quant	495.911	276.766	297.223	462
jgi|Phlrad1|132135|plus.g3783.t1	S07_quant	122.858	16.452	1243.64	1407
jgi|Phlrad1|132135|plus.g3783.t1	S08_quant	132.56	17.8306	1252.32	1407
jgi|Phlrad1|132135|plus.g3783.t1	S09_quant	189.97	25.5083	1246.15	1407
jgi|Phlrad1|132135|plus.g3783.t1	S10_quant	180.892	24.2856	1250.72	1407
jgi|Phlrad1|132135|plus.g3783.t1	S11_quant	206.951	27.9236	1257.81	1407
jgi|Phlrad1|132135|plus.g3783.t1	S12_quant	174.239	23.2931	1240.82	1407
jgi|Phlrad1|132136|plus.g3784.t1	S07_quant	1068.67	237.728	748.642	912
jgi|Phlrad1|132136|plus.g3784.t1	S08_quant	1174.92	261.335	757.318	912
jgi|Phlrad1|132136|plus.g3784.t1	S09_quant	1065.26	237.299	751.153	912
jgi|Phlrad1|132136|plus.g3784.t1	S10_quant	1158.5	257.41	755.716	912
jgi|Phlrad1|132136|plus.g3784.t1	S11_quant	1158.73	257.802	762.81	912
jgi|Phlrad1|132136|plus.g3784.t1	S12_quant	1224.14	272.262	745.822	912
jgi|Phlrad1|132137|plus.g3785.t1	S07_quant	10.7257	5.78981	308.512	471
jgi|Phlrad1|132137|plus.g3785.t1	S08_quant	11.4441	6.07806	317.162	471
jgi|Phlrad1|132137|plus.g3785.t1	S09_quant	9.19209	4.9412	311.28	471
jgi|Phlrad1|132137|plus.g3785.t1	S10_quant	12.8502	6.84222	315.358	471
jgi|Phlrad1|132137|plus.g3785.t1	S11_quant	15.259	8.02371	322.754	471
jgi|Phlrad1|132137|plus.g3785.t1	S12_quant	12.2861	6.65727	306.132	471
jgi|Phlrad1|132138|plus.g3786.t1	S07_quant	212.564	24.3023	1456.64	1620
jgi|Phlrad1|132138|plus.g3786.t1	S08_quant	225.067	25.8729	1465.32	1620
jgi|Phlrad1|132138|plus.g3786.t1	S09_quant	215.503	24.7128	1459.15	1620
jgi|Phlrad1|132138|plus.g3786.t1	S10_quant	222.408	25.5142	1463.72	1620
jgi|Phlrad1|132138|plus.g3786.t1	S11_quant	224.117	25.8606	1470.81	1620
jgi|Phlrad1|132138|plus.g3786.t1	S12_quant	262.475	29.9481	1453.82	1620
jgi|Phlrad1|132139|minus.g3746.t1	S07_quant	315.921	90.6107	580.642	744
jgi|Phlrad1|132139|minus.g3746.t1	S08_quant	165.939	47.4312	589.318	744
jgi|Phlrad1|132139|minus.g3746.t1	S09_quant	147.073	42.2008	583.153	744
jgi|Phlrad1|132139|minus.g3746.t1	S10_quant	105.767	30.2185	587.716	744
jgi|Phlrad1|132139|minus.g3746.t1	S11_quant	86.7858	24.7622	594.81	744
jgi|Phlrad1|132139|minus.g3746.t1	S12_quant	104.99	30.1402	577.822	744
jgi|Phlrad1|132140|plus.g3788.t1	S07_quant	83.8556	6.40702	2179.64	2343
jgi|Phlrad1|132140|plus.g3788.t1	S08_quant	88.6915	6.82711	2188.32	2343
jgi|Phlrad1|132140|plus.g3788.t1	S09_quant	71.4941	5.48218	2182.15	2343
jgi|Phlrad1|132140|plus.g3788.t1	S10_quant	85.0091	6.52774	2186.72	2343
jgi|Phlrad1|132140|plus.g3788.t1	S11_quant	90.6006	7.00892	2193.81	2343
jgi|Phlrad1|132140|plus.g3788.t1	S12_quant	81.5349	6.21315	2176.82	2343
jgi|Phlrad1|132141|minus.g3748.t1	S07_quant	287.644	42.6321	1123.64	1287
jgi|Phlrad1|132141|minus.g3748.t1	S08_quant	352.859	52.4926	1132.32	1287
jgi|Phlrad1|132141|minus.g3748.t1	S09_quant	412.623	61.3091	1126.15	1287
jgi|Phlrad1|132141|minus.g3748.t1	S10_quant	456.677	67.8181	1130.72	1287
jgi|Phlrad1|132141|minus.g3748.t1	S11_quant	507.363	75.6778	1137.81	1287
jgi|Phlrad1|132141|minus.g3748.t1	S12_quant	457.936	67.7734	1120.82	1287
jgi|Phlrad1|132142|plus.g3790.t1	S07_quant	49.7283	3.86874	2140.64	2304
jgi|Phlrad1|132142|plus.g3790.t1	S08_quant	51.4983	4.03606	2149.32	2304
jgi|Phlrad1|132142|plus.g3790.t1	S09_quant	57.1952	4.46556	2143.15	2304
jgi|Phlrad1|132142|plus.g3790.t1	S10_quant	61.2856	4.7915	2147.72	2304
jgi|Phlrad1|132142|plus.g3790.t1	S11_quant	61.0362	4.80726	2154.81	2304
jgi|Phlrad1|132142|plus.g3790.t1	S12_quant	31.2737	2.4266	2137.82	2304
jgi|Phlrad1|132143|minus.g3750.t1	S07_quant	108.232	10.8149	1666.64	1830
jgi|Phlrad1|132143|minus.g3750.t1	S08_quant	143.051	14.3833	1675.32	1830
jgi|Phlrad1|132143|minus.g3750.t1	S09_quant	117.455	11.7745	1669.15	1830
jgi|Phlrad1|132143|minus.g3750.t1	S10_quant	69.1935	6.94182	1673.72	1830
jgi|Phlrad1|132143|minus.g3750.t1	S11_quant	112.535	11.3629	1680.81	1830
jgi|Phlrad1|132143|minus.g3750.t1	S12_quant	90.4702	9.01966	1663.82	1830
jgi|Phlrad1|132144|plus.g3792.t1	S07_quant	58.5039	23.102	421.739	585
jgi|Phlrad1|132144|plus.g3792.t1	S08_quant	54.3593	21.2768	430.362	585
jgi|Phlrad1|132144|plus.g3792.t1	S09_quant	43.9178	17.3178	424.344	585
jgi|Phlrad1|132144|plus.g3792.t1	S10_quant	31.6313	12.3838	428.898	585
jgi|Phlrad1|132144|plus.g3792.t1	S11_quant	32.4255	12.623	435.955	585
jgi|Phlrad1|132144|plus.g3792.t1	S12_quant	18.9876	7.5178	418.958	585
jgi|Phlrad1|132145|minus.g3752.t1	S07_quant	1775.59	80.6903	3664.64	3828
jgi|Phlrad1|132145|minus.g3752.t1	S08_quant	2019.88	92.6258	3673.32	3828
jgi|Phlrad1|132145|minus.g3752.t1	S09_quant	1900.72	86.7278	3667.15	3828
jgi|Phlrad1|132145|minus.g3752.t1	S10_quant	1821.77	83.3131	3671.72	3828
jgi|Phlrad1|132145|minus.g3752.t1	S11_quant	1843.48	85.0455	3678.81	3828
jgi|Phlrad1|132145|minus.g3752.t1	S12_quant	2093.1	94.8166	3661.82	3828
jgi|Phlrad1|132146|minus.g3753.t1	S07_quant	926.312	44.1559	3493.64	3657
jgi|Phlrad1|132146|minus.g3753.t1	S08_quant	994.681	47.8402	3502.32	3657
jgi|Phlrad1|132146|minus.g3753.t1	S09_quant	1076.5	51.5218	3496.15	3657
jgi|Phlrad1|132146|minus.g3753.t1	S10_quant	1134.77	54.4305	3500.72	3657
jgi|Phlrad1|132146|minus.g3753.t1	S11_quant	1139.66	55.139	3507.81	3657
jgi|Phlrad1|132146|minus.g3753.t1	S12_quant	1080.06	51.3229	3490.82	3657
jgi|Phlrad1|132147|minus.g3754.t1	S07_quant	1.95013	3.16901	102.483	246
jgi|Phlrad1|132147|minus.g3754.t1	S08_quant	4.76836	7.13148	112.63	246
jgi|Phlrad1|132147|minus.g3754.t1	S09_quant	3.06403	4.70961	108.862	246
jgi|Phlrad1|132147|minus.g3754.t1	S10_quant	7.90783	12.48	106.398	246
jgi|Phlrad1|132147|minus.g3754.t1	S11_quant	6.67583	9.71804	116.586	246
jgi|Phlrad1|132147|minus.g3754.t1	S12_quant	5.58458	9.04212	102.45	246
jgi|Phlrad1|132148|minus.g3755.t1	S07_quant	305.195	71.9263	706.642	870
jgi|Phlrad1|132148|minus.g3755.t1	S08_quant	260.353	61.3095	715.318	870
jgi|Phlrad1|132148|minus.g3755.t1	S09_quant	223.674	52.777	709.153	870
jgi|Phlrad1|132148|minus.g3755.t1	S10_quant	357.829	84.186	713.716	870
jgi|Phlrad1|132148|minus.g3755.t1	S11_quant	367.171	86.4503	720.81	870
jgi|Phlrad1|132148|minus.g3755.t1	S12_quant	340.66	80.2878	703.822	870
jgi|Phlrad1|132149|minus.g3756.t1	S07_quant	203.789	23.1086	1468.64	1632
jgi|Phlrad1|132149|minus.g3756.t1	S08_quant	197.41	22.5092	1477.32	1632
jgi|Phlrad1|132149|minus.g3756.t1	S09_quant	213.461	24.2789	1471.15	1632
jgi|Phlrad1|132149|minus.g3756.t1	S10_quant	232.292	26.4315	1475.72	1632
jgi|Phlrad1|132149|minus.g3756.t1	S11_quant	180.247	20.6302	1482.81	1632
jgi|Phlrad1|132149|minus.g3756.t1	S12_quant	194.343	21.9928	1465.82	1632
jgi|Phlrad1|132150|minus.g3757.t1	S07_quant	1016.02	73.9644	2287.64	2451
jgi|Phlrad1|132150|minus.g3757.t1	S08_quant	1032.83	75.7637	2296.32	2451
jgi|Phlrad1|132150|minus.g3757.t1	S09_quant	1102.03	80.5189	2290.15	2451
jgi|Phlrad1|132150|minus.g3757.t1	S10_quant	1323.57	96.852	2294.72	2451
jgi|Phlrad1|132150|minus.g3757.t1	S11_quant	1138.71	83.9579	2301.81	2451
jgi|Phlrad1|132150|minus.g3757.t1	S12_quant	880.13	63.8978	2284.82	2451
jgi|Phlrad1|132151|minus.g3758.t1	S07_quant	1215.91	132.466	1528.64	1692
jgi|Phlrad1|132151|minus.g3758.t1	S08_quant	1235.01	135.323	1537.32	1692
jgi|Phlrad1|132151|minus.g3758.t1	S09_quant	1249.1	136.505	1531.15	1692
jgi|Phlrad1|132151|minus.g3758.t1	S10_quant	1347.3	147.313	1535.72	1692
jgi|Phlrad1|132151|minus.g3758.t1	S11_quant	1226.45	134.913	1542.81	1692
jgi|Phlrad1|132151|minus.g3758.t1	S12_quant	1296.74	140.975	1525.82	1692
jgi|Phlrad1|132152|plus.g3799.t1	S07_quant	1442.12	79.6136	3016.64	3180
jgi|Phlrad1|132152|plus.g3799.t1	S08_quant	1283.64	71.4724	3025.32	3180
jgi|Phlrad1|132152|plus.g3799.t1	S09_quant	1368.6	75.8509	3019.15	3180
jgi|Phlrad1|132152|plus.g3799.t1	S10_quant	1425.39	79.1555	3023.72	3180
jgi|Phlrad1|132152|plus.g3799.t1	S11_quant	1540.21	86.2463	3030.81	3180
jgi|Phlrad1|132152|plus.g3799.t1	S12_quant	1336.95	73.5849	3013.82	3180
jgi|Phlrad1|132153|minus.g3760.t1	S07_quant	15.601	6.89347	376.899	540
jgi|Phlrad1|132153|minus.g3760.t1	S08_quant	15.2588	6.66846	385.442	540
jgi|Phlrad1|132153|minus.g3760.t1	S09_quant	10.2134	4.50327	379.501	540
jgi|Phlrad1|132153|minus.g3760.t1	S10_quant	14.8272	6.48325	384.021	540
jgi|Phlrad1|132153|minus.g3760.t1	S11_quant	16.2127	7.03422	391.165	540
jgi|Phlrad1|132153|minus.g3760.t1	S12_quant	18.9876	8.41901	374.111	540
jgi|Phlrad1|132154|minus.g3761.t1	S07_quant	7.80052	16.9331	76.7181	210
jgi|Phlrad1|132154|minus.g3761.t1	S08_quant	0.953673	1.84721	86.9659	210
jgi|Phlrad1|132154|minus.g3761.t1	S09_quant	5.10672	10.1998	83.7755	210
jgi|Phlrad1|132154|minus.g3761.t1	S10_quant	1.97696	4.17127	79.5827	210
jgi|Phlrad1|132154|minus.g3761.t1	S11_quant	6.67583	12.5552	90.2404	210
jgi|Phlrad1|132154|minus.g3761.t1	S12_quant	2.23383	4.753	77.9604	210
jgi|Phlrad1|132155|plus.g3800.t1	S07_quant	149.185	29.5194	841.642	1005
jgi|Phlrad1|132155|plus.g3800.t1	S08_quant	105.858	20.9704	850.318	1005
jgi|Phlrad1|132155|plus.g3800.t1	S09_quant	129.711	25.7113	844.153	1005
jgi|Phlrad1|132155|plus.g3800.t1	S10_quant	156.18	30.8995	848.716	1005
jgi|Phlrad1|132155|plus.g3800.t1	S11_quant	184.062	36.5012	855.81	1005
jgi|Phlrad1|132155|plus.g3800.t1	S12_quant	188.759	37.3275	838.822	1005
jgi|Phlrad1|132156|minus.g3762.t1	S07_quant	27.3018	49.8391	91.2286	231
jgi|Phlrad1|132156|minus.g3762.t1	S08_quant	23.8418	39.4542	101.791	231
jgi|Phlrad1|132156|minus.g3762.t1	S09_quant	36.7684	62.7951	97.9756	231
jgi|Phlrad1|132156|minus.g3762.t1	S10_quant	40.5276	71.7201	94.8855	231
jgi|Phlrad1|132156|minus.g3762.t1	S11_quant	33.3792	53.7321	105.429	231
jgi|Phlrad1|132156|minus.g3762.t1	S12_quant	27.9229	50.4585	91.7947	231
jgi|Phlrad1|132157|minus.g3763.t1	S07_quant	62.4042	28.4748	364.974	528
jgi|Phlrad1|132157|minus.g3763.t1	S08_quant	80.8352	36.4622	373.442	528
jgi|Phlrad1|132157|minus.g3763.t1	S09_quant	72.5154	33.0105	367.576	528
jgi|Phlrad1|132157|minus.g3763.t1	S10_quant	96.8709	43.7191	372.059	528
jgi|Phlrad1|132157|minus.g3763.t1	S11_quant	102.999	46.0976	379.203	528
jgi|Phlrad1|132157|minus.g3763.t1	S12_quant	74.8334	34.27	362.221	528
jgi|Phlrad1|132158|plus.g3801.t1	S07_quant	290.569	15.6217	3097.64	3261
jgi|Phlrad1|132158|plus.g3801.t1	S08_quant	210.035	11.3897	3106.32	3261
jgi|Phlrad1|132158|plus.g3801.t1	S09_quant	217.546	11.7419	3100.15	3261
jgi|Phlrad1|132158|plus.g3801.t1	S10_quant	188.799	10.211	3104.72	3261
jgi|Phlrad1|132158|plus.g3801.t1	S11_quant	183.109	9.98654	3111.81	3261
jgi|Phlrad1|132158|plus.g3801.t1	S12_quant	153.018	8.20157	3094.82	3261
jgi|Phlrad1|132159|minus.g3765.t1	S07_quant	441.704	30.5527	2407.64	2571
jgi|Phlrad1|132159|minus.g3765.t1	S08_quant	360.488	25.1306	2416.32	2571
jgi|Phlrad1|132159|minus.g3765.t1	S09_quant	444.284	30.845	2410.15	2571
jgi|Phlrad1|132159|minus.g3765.t1	S10_quant	388.472	27.0137	2414.72	2571
jgi|Phlrad1|132159|minus.g3765.t1	S11_quant	409.133	28.6711	2421.81	2571
jgi|Phlrad1|132159|minus.g3765.t1	S12_quant	383.102	26.4255	2404.82	2571
jgi|Phlrad1|132160|minus.g3766.t1	S07_quant	98.4816	14.6352	1120.64	1284
jgi|Phlrad1|132160|minus.g3766.t1	S08_quant	87.7379	13.0869	1129.32	1284
jgi|Phlrad1|132160|minus.g3766.t1	S09_quant	83.7502	12.4772	1123.15	1284
jgi|Phlrad1|132160|minus.g3766.t1	S10_quant	47.447	7.06478	1127.72	1284
jgi|Phlrad1|132160|minus.g3766.t1	S11_quant	61.0362	9.12817	1134.81	1284
jgi|Phlrad1|132160|minus.g3766.t1	S12_quant	55.8458	8.28723	1117.82	1284
jgi|Phlrad1|132161|minus.g3767.t1	S07_quant	259.367	63.5542	679.642	843
jgi|Phlrad1|132161|minus.g3767.t1	S08_quant	277.519	67.9154	688.318	843
jgi|Phlrad1|132161|minus.g3767.t1	S09_quant	241.037	59.125	682.153	843
jgi|Phlrad1|132161|minus.g3767.t1	S10_quant	316.313	77.3446	686.716	843
jgi|Phlrad1|132161|minus.g3767.t1	S11_quant	298.505	73.0181	693.81	843
jgi|Phlrad1|132161|minus.g3767.t1	S12_quant	312.737	76.6471	676.822	843
jgi|Phlrad1|132162|plus.g3805.t1	S07_quant	0	0	1018.64	1182
jgi|Phlrad1|132162|plus.g3805.t1	S08_quant	0	0	1027.32	1182
jgi|Phlrad1|132162|plus.g3805.t1	S09_quant	0	0	1021.15	1182
jgi|Phlrad1|132162|plus.g3805.t1	S10_quant	0	0	1025.72	1182
jgi|Phlrad1|132162|plus.g3805.t1	S11_quant	0	0	1032.81	1182
jgi|Phlrad1|132162|plus.g3805.t1	S12_quant	0	0	1015.82	1182
jgi|Phlrad1|132163|minus.g3769.t1	S07_quant	0	0	1312.64	1476
jgi|Phlrad1|132163|minus.g3769.t1	S08_quant	0	0	1321.32	1476
jgi|Phlrad1|132163|minus.g3769.t1	S09_quant	0	0	1315.15	1476
jgi|Phlrad1|132163|minus.g3769.t1	S10_quant	0	0	1319.72	1476
jgi|Phlrad1|132163|minus.g3769.t1	S11_quant	0	0	1326.81	1476
jgi|Phlrad1|132163|minus.g3769.t1	S12_quant	0	0	1309.82	1476
jgi|Phlrad1|132164|plus.g3807.t1	S07_quant	0	0	1162.64	1326
jgi|Phlrad1|132164|plus.g3807.t1	S08_quant	0	0	1171.32	1326
jgi|Phlrad1|132164|plus.g3807.t1	S09_quant	0	0	1165.15	1326
jgi|Phlrad1|132164|plus.g3807.t1	S10_quant	0	0	1169.72	1326
jgi|Phlrad1|132164|plus.g3807.t1	S11_quant	0	0	1176.81	1326
jgi|Phlrad1|132164|plus.g3807.t1	S12_quant	0	0	1159.82	1326
jgi|Phlrad1|132165|plus.g3808.t1	S07_quant	0	0	433.739	597
jgi|Phlrad1|132165|plus.g3808.t1	S08_quant	0	0	442.318	597
jgi|Phlrad1|132165|plus.g3808.t1	S09_quant	0	0	436.257	597
jgi|Phlrad1|132165|plus.g3808.t1	S10_quant	0	0	440.812	597
jgi|Phlrad1|132165|plus.g3808.t1	S11_quant	0	0	447.955	597
jgi|Phlrad1|132165|plus.g3808.t1	S12_quant	0	0	430.915	597
jgi|Phlrad1|132166|minus.g3772.t1	S07_quant	0	0	1357.64	1521
jgi|Phlrad1|132166|minus.g3772.t1	S08_quant	0	0	1366.32	1521
jgi|Phlrad1|132166|minus.g3772.t1	S09_quant	0	0	1360.15	1521
jgi|Phlrad1|132166|minus.g3772.t1	S10_quant	0	0	1364.72	1521
jgi|Phlrad1|132166|minus.g3772.t1	S11_quant	0	0	1371.81	1521
jgi|Phlrad1|132166|minus.g3772.t1	S12_quant	0	0	1354.82	1521
jgi|Phlrad1|132167|plus.g3810.t1	S07_quant	1375.82	105.12	2179.64	2343
jgi|Phlrad1|132167|plus.g3810.t1	S08_quant	1209.26	93.0837	2188.32	2343
jgi|Phlrad1|132167|plus.g3810.t1	S09_quant	1213.36	93.0405	2182.15	2343
jgi|Phlrad1|132167|plus.g3810.t1	S10_quant	1282.06	98.4475	2186.72	2343
jgi|Phlrad1|132167|plus.g3810.t1	S11_quant	1215.96	94.0671	2193.81	2343
jgi|Phlrad1|132167|plus.g3810.t1	S12_quant	1238.66	94.3889	2176.82	2343
jgi|Phlrad1|132168|minus.g3774.t1	S07_quant	57.5288	7.54001	1270.64	1434
jgi|Phlrad1|132168|minus.g3774.t1	S08_quant	77.2475	10.1712	1279.32	1434
jgi|Phlrad1|132168|minus.g3774.t1	S09_quant	62.302	8.18823	1273.15	1434
jgi|Phlrad1|132168|minus.g3774.t1	S10_quant	47.447	6.23539	1277.72	1434
jgi|Phlrad1|132168|minus.g3774.t1	S11_quant	45.7771	6.04685	1284.81	1434
jgi|Phlrad1|132168|minus.g3774.t1	S12_quant	36.8582	4.82245	1267.82	1434
jgi|Phlrad1|132169|minus.g3775.t1	S07_quant	0	0	141.734	294
jgi|Phlrad1|132169|minus.g3775.t1	S08_quant	1.90735	2.12179	151.423	294
jgi|Phlrad1|132169|minus.g3775.t1	S09_quant	4.08537	4.63916	147.354	294
jgi|Phlrad1|132169|minus.g3775.t1	S10_quant	2.96543	3.39557	146.644	294
jgi|Phlrad1|132169|minus.g3775.t1	S11_quant	2.86107	3.11589	155.835	294
jgi|Phlrad1|132169|minus.g3775.t1	S12_quant	4.46767	5.27706	140.437	294
jgi|Phlrad1|132170|plus.g3812.t1	S07_quant	53.6286	7.11279	1255.64	1419
jgi|Phlrad1|132170|plus.g3812.t1	S08_quant	48.6373	6.48005	1264.32	1419
jgi|Phlrad1|132170|plus.g3812.t1	S09_quant	60.2593	8.01418	1258.15	1419
jgi|Phlrad1|132170|plus.g3812.t1	S10_quant	59.3087	7.88683	1262.72	1419
jgi|Phlrad1|132170|plus.g3812.t1	S11_quant	52.453	7.01053	1269.81	1419
jgi|Phlrad1|132170|plus.g3812.t1	S12_quant	74.8334	9.90827	1252.82	1419
jgi|Phlrad1|132171|minus.g3777.t1	S07_quant	610.391	22.8708	4444.64	4608
jgi|Phlrad1|132171|minus.g3777.t1	S08_quant	599.86	22.6898	4453.32	4608
jgi|Phlrad1|132171|minus.g3777.t1	S09_quant	653.66	24.5945	4447.15	4608
jgi|Phlrad1|132171|minus.g3777.t1	S10_quant	687.981	25.9501	4451.72	4608
jgi|Phlrad1|132171|minus.g3777.t1	S11_quant	734.342	27.9511	4458.81	4608
jgi|Phlrad1|132171|minus.g3777.t1	S12_quant	743.866	27.7796	4441.82	4608
jgi|Phlrad1|132172|minus.g3778.t1	S07_quant	912.661	237.249	640.642	804
jgi|Phlrad1|132172|minus.g3778.t1	S08_quant	814.436	211.283	649.318	804
jgi|Phlrad1|132172|minus.g3778.t1	S09_quant	848.737	220.814	643.153	804
jgi|Phlrad1|132172|minus.g3778.t1	S10_quant	935.1	242.417	647.716	804
jgi|Phlrad1|132172|minus.g3778.t1	S11_quant	919.358	238.28	654.81	804
jgi|Phlrad1|132172|minus.g3778.t1	S12_quant	922.573	239.935	637.822	804
jgi|Phlrad1|132173|plus.g3815.t1	S07_quant	217.44	30.9067	1171.64	1335
jgi|Phlrad1|132173|plus.g3815.t1	S08_quant	181.198	25.8594	1180.32	1335
jgi|Phlrad1|132173|plus.g3815.t1	S09_quant	161.372	22.9971	1174.15	1335
jgi|Phlrad1|132173|plus.g3815.t1	S10_quant	211.534	30.1343	1178.72	1335
jgi|Phlrad1|132173|plus.g3815.t1	S11_quant	216.488	30.984	1185.81	1335
jgi|Phlrad1|132173|plus.g3815.t1	S12_quant	192.11	27.2642	1168.82	1335
jgi|Phlrad1|132174|minus.g3780.t1	S07_quant	124.808	21.547	964.642	1128
jgi|Phlrad1|132174|minus.g3780.t1	S08_quant	117.302	20.3009	973.318	1128
jgi|Phlrad1|132174|minus.g3780.t1	S09_quant	128.689	22.2647	967.153	1128
jgi|Phlrad1|132174|minus.g3780.t1	S10_quant	89.9515	15.5439	971.716	1128
jgi|Phlrad1|132174|minus.g3780.t1	S11_quant	101.091	17.5281	978.81	1128
jgi|Phlrad1|132174|minus.g3780.t1	S12_quant	93.821	16.1807	961.822	1128
jgi|Phlrad1|132175|plus.g3817.t1	S07_quant	87.7559	17.3027	844.642	1008
jgi|Phlrad1|132175|plus.g3817.t1	S08_quant	79.1548	15.6254	853.318	1008
jgi|Phlrad1|132175|plus.g3817.t1	S09_quant	87.8355	17.3491	847.153	1008
jgi|Phlrad1|132175|plus.g3817.t1	S10_quant	1279.09	252.172	851.716	1008
jgi|Phlrad1|132175|plus.g3817.t1	S11_quant	2332.73	460.984	858.81	1008
jgi|Phlrad1|132175|plus.g3817.t1	S12_quant	1343.65	264.763	841.822	1008
jgi|Phlrad1|132176|plus.g3818.t1	S07_quant	515.809	72.5736	1183.64	1347
jgi|Phlrad1|132176|plus.g3818.t1	S08_quant	530.242	74.9113	1192.32	1347
jgi|Phlrad1|132176|plus.g3818.t1	S09_quant	533.141	75.2091	1186.15	1347
jgi|Phlrad1|132176|plus.g3818.t1	S10_quant	538.721	75.9706	1190.72	1347
jgi|Phlrad1|132176|plus.g3818.t1	S11_quant	589.381	83.5079	1197.81	1347
jgi|Phlrad1|132176|plus.g3818.t1	S12_quant	593.083	83.3148	1180.82	1347
jgi|Phlrad1|132177|plus.g3819.t1	S07_quant	217.44	31.2266	1159.64	1323
jgi|Phlrad1|132177|plus.g3819.t1	S08_quant	194.549	28.0501	1168.32	1323
jgi|Phlrad1|132177|plus.g3819.t1	S09_quant	213.461	30.7343	1162.15	1323
jgi|Phlrad1|132177|plus.g3819.t1	S10_quant	206.592	29.733	1166.72	1323
jgi|Phlrad1|132177|plus.g3819.t1	S11_quant	221.256	31.9902	1173.81	1323
jgi|Phlrad1|132177|plus.g3819.t1	S12_quant	215.565	30.9103	1156.82	1323
jgi|Phlrad1|132178|minus.g3784.t1	S07_quant	67.2795	16.2704	688.642	852
jgi|Phlrad1|132178|minus.g3784.t1	S08_quant	83.9232	20.2729	697.318	852
jgi|Phlrad1|132178|minus.g3784.t1	S09_quant	100.092	24.2322	691.153	852
jgi|Phlrad1|132178|minus.g3784.t1	S10_quant	103.79	25.0504	695.716	852
jgi|Phlrad1|132178|minus.g3784.t1	S11_quant	109.674	26.4842	702.81	852
jgi|Phlrad1|132178|minus.g3784.t1	S12_quant	94.9379	22.9625	685.822	852
jgi|Phlrad1|132179|plus.g3821.t1	S07_quant	63.3792	11.7064	901.642	1065
jgi|Phlrad1|132179|plus.g3821.t1	S08_quant	50.5446	9.35292	910.318	1065
jgi|Phlrad1|132179|plus.g3821.t1	S09_quant	53.1099	9.82884	904.153	1065
jgi|Phlrad1|132179|plus.g3821.t1	S10_quant	78.0898	14.4297	908.716	1065
jgi|Phlrad1|132179|plus.g3821.t1	S11_quant	116.35	21.5616	915.81	1065
jgi|Phlrad1|132179|plus.g3821.t1	S12_quant	101.639	18.7577	898.822	1065
jgi|Phlrad1|132180|minus.g3786.t1	S07_quant	150.16	23.3136	1072.64	1236
jgi|Phlrad1|132180|minus.g3786.t1	S08_quant	142.097	22.1359	1081.32	1236
jgi|Phlrad1|132180|minus.g3786.t1	S09_quant	114.39	17.8028	1075.15	1236
jgi|Phlrad1|132180|minus.g3786.t1	S10_quant	145.306	22.5977	1079.72	1236
jgi|Phlrad1|132180|minus.g3786.t1	S11_quant	145.915	22.7858	1086.81	1236
jgi|Phlrad1|132180|minus.g3786.t1	S12_quant	160.836	24.9381	1069.82	1236
jgi|Phlrad1|132181|plus.g3823.t1	S07_quant	507.034	30.2148	2794.64	2958
jgi|Phlrad1|132181|plus.g3823.t1	S08_quant	437.736	26.303	2803.32	2958
jgi|Phlrad1|132181|plus.g3823.t1	S09_quant	513.736	30.7321	2797.15	2958
jgi|Phlrad1|132181|plus.g3823.t1	S10_quant	512.032	30.6876	2801.72	2958
jgi|Phlrad1|132181|plus.g3823.t1	S11_quant	481.614	29.1002	2808.81	2958
jgi|Phlrad1|132181|plus.g3823.t1	S12_quant	488.093	29.0005	2791.82	2958
jgi|Phlrad1|132182|minus.g3788.t1	S07_quant	47.7782	14.8532	535.696	699
jgi|Phlrad1|132182|minus.g3788.t1	S08_quant	48.6373	15.0516	544.318	699
jgi|Phlrad1|132182|minus.g3788.t1	S09_quant	43.9178	13.6539	538.21	699
jgi|Phlrad1|132182|minus.g3788.t1	S10_quant	41.5161	12.845	542.716	699
jgi|Phlrad1|132182|minus.g3788.t1	S11_quant	39.1013	12.0697	549.81	699
jgi|Phlrad1|132182|minus.g3788.t1	S12_quant	37.9752	11.8225	532.822	699
jgi|Phlrad1|132183|plus.g3825.t1	S07_quant	152.11	30.0982	841.642	1005
jgi|Phlrad1|132183|plus.g3825.t1	S08_quant	169.754	33.6282	850.318	1005
jgi|Phlrad1|132183|plus.g3825.t1	S09_quant	150.138	29.7603	844.153	1005
jgi|Phlrad1|132183|plus.g3825.t1	S10_quant	152.226	30.1172	848.716	1005
jgi|Phlrad1|132183|plus.g3825.t1	S11_quant	136.378	27.0449	855.81	1005
jgi|Phlrad1|132183|plus.g3825.t1	S12_quant	118.393	23.4125	838.822	1005
jgi|Phlrad1|132184|plus.g3826.t1	S07_quant	154.06	20.1919	1270.64	1434
jgi|Phlrad1|132184|plus.g3826.t1	S08_quant	176.429	23.2305	1279.32	1434
jgi|Phlrad1|132184|plus.g3826.t1	S09_quant	148.095	19.4638	1273.15	1434
jgi|Phlrad1|132184|plus.g3826.t1	S10_quant	150.249	19.7454	1277.72	1434
jgi|Phlrad1|132184|plus.g3826.t1	S11_quant	112.535	14.8652	1284.81	1434
jgi|Phlrad1|132184|plus.g3826.t1	S12_quant	155.251	20.3128	1267.82	1434
jgi|Phlrad1|132185|plus.g3827.t1	S07_quant	69.2296	12.2568	940.642	1104
jgi|Phlrad1|132185|plus.g3827.t1	S08_quant	62.9424	11.1686	949.318	1104
jgi|Phlrad1|132185|plus.g3827.t1	S09_quant	61.2806	10.872	943.153	1104
jgi|Phlrad1|132185|plus.g3827.t1	S10_quant	64.2511	11.3839	947.716	1104
jgi|Phlrad1|132185|plus.g3827.t1	S11_quant	50.5456	8.98433	954.81	1104
jgi|Phlrad1|132185|plus.g3827.t1	S12_quant	65.8981	11.6558	937.822	1104
jgi|Phlrad1|132186|minus.g3792.t1	S07_quant	361.749	240.94	250.039	411
jgi|Phlrad1|132186|minus.g3792.t1	S08_quant	395.774	257.809	258.592	411
jgi|Phlrad1|132186|minus.g3792.t1	S09_quant	395.26	261.618	252.804	411
jgi|Phlrad1|132186|minus.g3792.t1	S10_quant	189.788	124.327	256.327	411
jgi|Phlrad1|132186|minus.g3792.t1	S11_quant	208.858	134.201	264.128	411
jgi|Phlrad1|132186|minus.g3792.t1	S12_quant	214.448	143.708	247.532	411
jgi|Phlrad1|132187|minus.g3793.t1	S07_quant	19.5013	4.55724	712.642	876
jgi|Phlrad1|132187|minus.g3793.t1	S08_quant	14.3051	3.34064	721.318	876
jgi|Phlrad1|132187|minus.g3793.t1	S09_quant	22.4696	5.25732	715.153	876
jgi|Phlrad1|132187|minus.g3793.t1	S10_quant	22.735	5.30425	719.716	876
jgi|Phlrad1|132187|minus.g3793.t1	S11_quant	20.0275	4.67655	726.81	876
jgi|Phlrad1|132187|minus.g3793.t1	S12_quant	20.1045	4.69824	709.822	876
jgi|Phlrad1|132188|plus.g3829.t1	S07_quant	1291.96	54.7249	3931.64	4095
jgi|Phlrad1|132188|plus.g3829.t1	S08_quant	1441	61.6024	3940.32	4095
jgi|Phlrad1|132188|plus.g3829.t1	S09_quant	1546.31	65.7681	3934.15	4095
jgi|Phlrad1|132188|plus.g3829.t1	S10_quant	1690.3	72.0607	3938.72	4095
jgi|Phlrad1|132188|plus.g3829.t1	S11_quant	1668.96	71.7842	3945.81	4095
jgi|Phlrad1|132188|plus.g3829.t1	S12_quant	1602.78	67.6709	3928.82	4095
jgi|Phlrad1|132189|plus.g3830.t1	S07_quant	257.417	135.043	317.45	480
jgi|Phlrad1|132189|plus.g3830.t1	S08_quant	258.445	133.541	326.001	480
jgi|Phlrad1|132189|plus.g3830.t1	S09_quant	302.318	157.991	320.185	480
jgi|Phlrad1|132189|plus.g3830.t1	S10_quant	303.463	157.16	324.23	480
jgi|Phlrad1|132189|plus.g3830.t1	S11_quant	297.551	152.248	331.688	480
jgi|Phlrad1|132189|plus.g3830.t1	S12_quant	333.958	175.945	314.852	480
jgi|Phlrad1|132190|minus.g3795.t1	S07_quant	0.975065	0.594109	273.323	435
jgi|Phlrad1|132190|minus.g3795.t1	S08_quant	2.86102	1.71047	281.754	435
jgi|Phlrad1|132190|minus.g3795.t1	S09_quant	0	0	276.011	435
jgi|Phlrad1|132190|minus.g3795.t1	S10_quant	0	0	279.768	435
jgi|Phlrad1|132190|minus.g3795.t1	S11_quant	0.95369	0.56331	287.329	435
jgi|Phlrad1|132190|minus.g3795.t1	S12_quant	1.11692	0.683894	270.909	435
jgi|Phlrad1|132191|plus.g3832.t1	S07_quant	395.876	35.9939	1831.64	1995
jgi|Phlrad1|132191|plus.g3832.t1	S08_quant	418.662	38.3209	1840.32	1995
jgi|Phlrad1|132191|plus.g3832.t1	S09_quant	450.413	41.0907	1834.15	1995
jgi|Phlrad1|132191|plus.g3832.t1	S10_quant	405.276	37.0106	1838.72	1995
jgi|Phlrad1|132191|plus.g3832.t1	S11_quant	473.03	43.4932	1845.81	1995
jgi|Phlrad1|132191|plus.g3832.t1	S12_quant	508.197	46.0948	1828.82	1995
jgi|Phlrad1|132192|minus.g3797.t1	S07_quant	104.332	18.3544	946.642	1110
jgi|Phlrad1|132192|minus.g3797.t1	S08_quant	82.0158	14.4616	955.318	1110
jgi|Phlrad1|132192|minus.g3797.t1	S09_quant	109.284	19.2659	949.153	1110
jgi|Phlrad1|132192|minus.g3797.t1	S10_quant	71.1704	12.5306	953.716	1110
jgi|Phlrad1|132192|minus.g3797.t1	S11_quant	70.5731	12.4658	960.81	1110
jgi|Phlrad1|132192|minus.g3797.t1	S12_quant	88.2364	15.5078	943.822	1110
jgi|Phlrad1|132193|plus.g3834.t1	S07_quant	549.937	147.09	622.642	786
jgi|Phlrad1|132193|plus.g3834.t1	S08_quant	575.065	153.438	631.318	786
jgi|Phlrad1|132193|plus.g3834.t1	S09_quant	584.209	156.369	625.153	786
jgi|Phlrad1|132193|plus.g3834.t1	S10_quant	596.052	158.939	629.716	786
jgi|Phlrad1|132193|plus.g3834.t1	S11_quant	522.622	139.283	636.81	786
jgi|Phlrad1|132193|plus.g3834.t1	S12_quant	566.277	151.549	619.822	786
jgi|Phlrad1|132194|plus.g3835.t1	S07_quant	14.626	3.46165	703.642	867
jgi|Phlrad1|132194|plus.g3835.t1	S08_quant	19.0735	4.51046	712.318	867
jgi|Phlrad1|132194|plus.g3835.t1	S09_quant	22.4696	5.32432	706.153	867
jgi|Phlrad1|132194|plus.g3835.t1	S10_quant	21.7465	5.13788	710.716	867
jgi|Phlrad1|132194|plus.g3835.t1	S11_quant	21.9349	5.18615	717.81	867
jgi|Phlrad1|132194|plus.g3835.t1	S12_quant	11.1692	2.64365	700.822	867
jgi|Phlrad1|132195|plus.g3836.t1	S07_quant	41.9278	7.90197	883.642	1047
jgi|Phlrad1|132195|plus.g3836.t1	S08_quant	32.4249	6.12102	892.318	1047
jgi|Phlrad1|132195|plus.g3836.t1	S09_quant	30.6403	5.78566	886.153	1047
jgi|Phlrad1|132195|plus.g3836.t1	S10_quant	50.4124	9.50359	890.716	1047
jgi|Phlrad1|132195|plus.g3836.t1	S11_quant	31.4718	5.94917	897.81	1047
jgi|Phlrad1|132195|plus.g3836.t1	S12_quant	27.9229	5.25853	880.822	1047
jgi|Phlrad1|132196|plus.g3837.t1	S07_quant	461.049	94.6002	811.642	975
jgi|Phlrad1|132196|plus.g3837.t1	S08_quant	373.84	76.7659	820.318	975
jgi|Phlrad1|132196|plus.g3837.t1	S09_quant	298.712	61.3925	814.153	975
jgi|Phlrad1|132196|plus.g3837.t1	S10_quant	148.085	30.3716	818.716	975
jgi|Phlrad1|132196|plus.g3837.t1	S11_quant	134.133	27.566	825.81	975
jgi|Phlrad1|132196|plus.g3837.t1	S12_quant	140.731	28.8622	808.822	975
jgi|Phlrad1|132197|minus.g3800.t1	S07_quant	52.6535	6.58985	1330.64	1494
jgi|Phlrad1|132197|minus.g3800.t1	S08_quant	56.2667	7.07673	1339.32	1494
jgi|Phlrad1|132197|minus.g3800.t1	S09_quant	58.2166	7.30694	1333.15	1494
jgi|Phlrad1|132197|minus.g3800.t1	S10_quant	61.2856	7.69281	1337.72	1494
jgi|Phlrad1|132197|minus.g3800.t1	S11_quant	46.7308	5.89742	1344.81	1494
jgi|Phlrad1|132197|minus.g3800.t1	S12_quant	70.3657	8.79049	1327.82	1494
jgi|Phlrad1|132198|plus.g3839.t1	S07_quant	14.626	4.37581	556.642	720
jgi|Phlrad1|132198|plus.g3839.t1	S08_quant	14.3051	4.26249	565.318	720
jgi|Phlrad1|132198|plus.g3839.t1	S09_quant	14.2988	4.27852	559.21	720
jgi|Phlrad1|132198|plus.g3839.t1	S10_quant	8.8963	2.64996	563.716	720
jgi|Phlrad1|132198|plus.g3839.t1	S11_quant	15.259	4.53686	570.81	720
jgi|Phlrad1|132198|plus.g3839.t1	S12_quant	20.1045	6.02164	553.822	720
jgi|Phlrad1|132199|plus.g3840.t1	S07_quant	56.5538	7.03044	1339.64	1503
jgi|Phlrad1|132199|plus.g3840.t1	S08_quant	52.732	6.58791	1348.32	1503
jgi|Phlrad1|132199|plus.g3840.t1	S09_quant	71.4941	8.91326	1342.15	1503
jgi|Phlrad1|132199|plus.g3840.t1	S10_quant	43.5697	5.43248	1346.72	1503
jgi|Phlrad1|132199|plus.g3840.t1	S11_quant	40.2597	5.04699	1353.81	1503
jgi|Phlrad1|132199|plus.g3840.t1	S12_quant	54.7289	6.79102	1336.82	1503
jgi|Phlrad1|132200|plus.g3841.t1	S07_quant	74.1049	15.4915	796.642	960
jgi|Phlrad1|132200|plus.g3841.t1	S08_quant	54.3593	11.3703	805.318	960
jgi|Phlrad1|132200|plus.g3841.t1	S09_quant	75.5794	15.825	799.153	960
jgi|Phlrad1|132200|plus.g3841.t1	S10_quant	57.3317	11.9779	803.716	960
jgi|Phlrad1|132200|plus.g3841.t1	S11_quant	53.4067	11.1788	810.81	960
jgi|Phlrad1|132200|plus.g3841.t1	S12_quant	40.209	8.40217	793.822	960
jgi|Phlrad1|132201|minus.g3803.t1	S07_quant	66.4612	18.1255	610.642	774
jgi|Phlrad1|132201|minus.g3803.t1	S08_quant	59.1277	16.0821	619.318	774
jgi|Phlrad1|132201|minus.g3803.t1	S09_quant	81.228	22.1669	613.153	774
jgi|Phlrad1|132201|minus.g3803.t1	S10_quant	73.334	19.9345	617.716	774
jgi|Phlrad1|132201|minus.g3803.t1	S11_quant	55.6518	15.1165	624.81	774
jgi|Phlrad1|132201|minus.g3803.t1	S12_quant	62.5473	17.0696	607.822	774
jgi|Phlrad1|132202|minus.g3804.t1	S07_quant	53.6286	21.4825	415.739	579
jgi|Phlrad1|132202|minus.g3804.t1	S08_quant	49.591	19.6848	424.362	579
jgi|Phlrad1|132202|minus.g3804.t1	S09_quant	59.2379	23.6939	418.344	579
jgi|Phlrad1|132202|minus.g3804.t1	S10_quant	45.47	18.0524	422.941	579
jgi|Phlrad1|132202|minus.g3804.t1	S11_quant	32.4255	12.7992	429.955	579
jgi|Phlrad1|132202|minus.g3804.t1	S12_quant	41.3259	16.6	412.958	579
jgi|Phlrad1|132203|minus.g3805.t1	S07_quant	30.8475	2.78646	1843.64	2007
jgi|Phlrad1|132203|minus.g3805.t1	S08_quant	105.465	9.59087	1852.32	2007
jgi|Phlrad1|132203|minus.g3805.t1	S09_quant	36.9077	3.34517	1846.15	2007
jgi|Phlrad1|132203|minus.g3805.t1	S10_quant	30.0061	2.72245	1850.72	2007
jgi|Phlrad1|132203|minus.g3805.t1	S11_quant	28.6271	2.61514	1857.81	2007
jgi|Phlrad1|132203|minus.g3805.t1	S12_quant	95.3196	8.58938	1840.82	2007
jgi|Phlrad1|132204|minus.g3805.t2	S07_quant	273.373	24.5739	1852.64	2016
jgi|Phlrad1|132204|minus.g3805.t2	S08_quant	136.548	12.3575	1861.32	2016
jgi|Phlrad1|132204|minus.g3805.t2	S09_quant	283.794	25.5972	1855.15	2016
jgi|Phlrad1|132204|minus.g3805.t2	S10_quant	182.517	16.4796	1859.72	2016
jgi|Phlrad1|132204|minus.g3805.t2	S11_quant	174.304	15.8463	1866.81	2016
jgi|Phlrad1|132204|minus.g3805.t2	S12_quant	86.7378	7.77804	1849.82	2016
jgi|Phlrad1|132205|minus.g3806.t1	S07_quant	2179.27	125.163	2899.64	3063
jgi|Phlrad1|132205|minus.g3806.t1	S08_quant	1697.48	98.3167	2908.32	3063
jgi|Phlrad1|132205|minus.g3806.t1	S09_quant	2084.56	120.189	2902.15	3063
jgi|Phlrad1|132205|minus.g3806.t1	S10_quant	1118.88	64.6355	2906.72	3063
jgi|Phlrad1|132205|minus.g3806.t1	S11_quant	1067.18	62.1578	2913.81	3063
jgi|Phlrad1|132205|minus.g3806.t1	S12_quant	1033.15	59.1605	2896.82	3063
jgi|Phlrad1|132206|minus.g3807.t1	S07_quant	21.4514	13.7993	258.886	420
jgi|Phlrad1|132206|minus.g3807.t1	S08_quant	23.8418	15.0216	267.354	420
jgi|Phlrad1|132206|minus.g3807.t1	S09_quant	22.4696	14.3809	261.442	420
jgi|Phlrad1|132206|minus.g3807.t1	S10_quant	11.8617	7.51501	265.038	420
jgi|Phlrad1|132206|minus.g3807.t1	S11_quant	17.1664	10.6795	272.803	420
jgi|Phlrad1|132206|minus.g3807.t1	S12_quant	21.2214	13.7303	256.381	420
jgi|Phlrad1|132207|plus.g3845.t1	S07_quant	45.8281	3.43068	2224.64	2388
jgi|Phlrad1|132207|plus.g3845.t1	S08_quant	40.0542	3.02109	2233.32	2388
jgi|Phlrad1|132207|plus.g3845.t1	S09_quant	25.5336	1.91836	2227.15	2388
jgi|Phlrad1|132207|plus.g3845.t1	S10_quant	22.735	1.71059	2231.72	2388
jgi|Phlrad1|132207|plus.g3845.t1	S11_quant	35.2865	2.67492	2238.81	2388
jgi|Phlrad1|132207|plus.g3845.t1	S12_quant	27.9229	2.0847	2221.82	2388
jgi|Phlrad1|132208|minus.g3809.t1	S07_quant	465.106	142.217	544.642	708
jgi|Phlrad1|132208|minus.g3809.t1	S08_quant	539.779	164.326	553.318	708
jgi|Phlrad1|132208|minus.g3809.t1	S09_quant	541.312	165.525	547.21	708
jgi|Phlrad1|132208|minus.g3809.t1	S10_quant	642.511	195.549	551.716	708
jgi|Phlrad1|132208|minus.g3809.t1	S11_quant	637.065	193.481	558.81	708
jgi|Phlrad1|132208|minus.g3809.t1	S12_quant	570.744	174.734	541.822	708
jgi|Phlrad1|132209|minus.g3810.t1	S07_quant	5.85039	5.87685	165.787	321
jgi|Phlrad1|132209|minus.g3810.t1	S08_quant	4.76836	4.59285	174.885	321
jgi|Phlrad1|132209|minus.g3810.t1	S09_quant	7.14941	7.03088	170.149	321
jgi|Phlrad1|132209|minus.g3810.t1	S10_quant	3.95391	3.8859	170.854	321
jgi|Phlrad1|132209|minus.g3810.t1	S11_quant	5.72214	5.40684	179.612	321
jgi|Phlrad1|132209|minus.g3810.t1	S12_quant	8.93533	9.03649	164.022	321
jgi|Phlrad1|132210|plus.g3847.t1	S07_quant	281.794	24.009	1954.64	2118
jgi|Phlrad1|132210|plus.g3847.t1	S08_quant	226.974	19.4738	1963.32	2118
jgi|Phlrad1|132210|plus.g3847.t1	S09_quant	231.845	19.8217	1957.15	2118
jgi|Phlrad1|132210|plus.g3847.t1	S10_quant	259.97	22.2524	1961.72	2118
jgi|Phlrad1|132210|plus.g3847.t1	S11_quant	233.654	20.1414	1968.81	2118
jgi|Phlrad1|132210|plus.g3847.t1	S12_quant	288.164	24.4902	1951.82	2118
jgi|Phlrad1|132211|minus.g3812.t1	S07_quant	86.7808	7.37114	1960.64	2124
jgi|Phlrad1|132211|minus.g3812.t1	S08_quant	99.1819	8.48364	1969.32	2124
jgi|Phlrad1|132211|minus.g3812.t1	S09_quant	84.7715	7.22545	1963.15	2124
jgi|Phlrad1|132211|minus.g3812.t1	S10_quant	107.744	9.19435	1967.72	2124
jgi|Phlrad1|132211|minus.g3812.t1	S11_quant	119.211	10.245	1974.81	2124
jgi|Phlrad1|132211|minus.g3812.t1	S12_quant	98.2887	8.32764	1957.82	2124
jgi|Phlrad1|132212|plus.g3849.t2	S07_quant	19.9792	1.28732	2584.64	2748
jgi|Phlrad1|132212|plus.g3849.t2	S08_quant	80.3201	5.21715	2593.32	2748
jgi|Phlrad1|132212|plus.g3849.t2	S09_quant	24.328	1.57345	2587.15	2748
jgi|Phlrad1|132212|plus.g3849.t2	S10_quant	43.9385	2.84674	2591.72	2748
jgi|Phlrad1|132212|plus.g3849.t2	S11_quant	21.4849	1.40307	2598.81	2748
jgi|Phlrad1|132212|plus.g3849.t2	S12_quant	0	0	2581.82	2748
jgi|Phlrad1|132213|plus.g3849.t1	S07_quant	404.174	26.2555	2563.64	2727
jgi|Phlrad1|132213|plus.g3849.t1	S08_quant	240.114	15.7238	2572.32	2727
jgi|Phlrad1|132213|plus.g3849.t1	S09_quant	329.057	21.4564	2566.15	2727
jgi|Phlrad1|132213|plus.g3849.t1	S10_quant	340.58	22.2461	2570.72	2727
jgi|Phlrad1|132213|plus.g3849.t1	S11_quant	364.76	24.0146	2577.81	2727
jgi|Phlrad1|132213|plus.g3849.t1	S12_quant	351.829	22.79	2560.82	2727
jgi|Phlrad1|132214|minus.g3814.t1	S07_quant	1720.99	76.2124	3760.64	3924
jgi|Phlrad1|132214|minus.g3814.t1	S08_quant	1721.38	76.927	3769.32	3924
jgi|Phlrad1|132214|minus.g3814.t1	S09_quant	1871.1	83.1983	3763.15	3924
jgi|Phlrad1|132214|minus.g3814.t1	S10_quant	1810.89	80.7057	3767.72	3924
jgi|Phlrad1|132214|minus.g3814.t1	S11_quant	1703.29	76.5796	3774.81	3924
jgi|Phlrad1|132214|minus.g3814.t1	S12_quant	1720.05	75.9271	3757.82	3924
jgi|Phlrad1|132215|plus.g3851.t1	S07_quant	209.639	29.054	1201.64	1365
jgi|Phlrad1|132215|plus.g3851.t1	S08_quant	152.588	21.2366	1210.32	1365
jgi|Phlrad1|132215|plus.g3851.t1	S09_quant	160.351	22.2822	1204.15	1365
jgi|Phlrad1|132215|plus.g3851.t1	S10_quant	180.892	25.1295	1208.72	1365
jgi|Phlrad1|132215|plus.g3851.t1	S11_quant	168.803	23.5632	1215.81	1365
jgi|Phlrad1|132215|plus.g3851.t1	S12_quant	164.187	22.7183	1198.82	1365
jgi|Phlrad1|132216|minus.g3816.t1	S07_quant	52.6535	9.23372	949.642	1113
jgi|Phlrad1|132216|minus.g3816.t1	S08_quant	67.7108	11.9018	958.318	1113
jgi|Phlrad1|132216|minus.g3816.t1	S09_quant	44.9391	7.89744	952.153	1113
jgi|Phlrad1|132216|minus.g3816.t1	S10_quant	46.4585	8.15402	956.716	1113
jgi|Phlrad1|132216|minus.g3816.t1	S11_quant	50.5456	8.90043	963.81	1113
jgi|Phlrad1|132216|minus.g3816.t1	S12_quant	54.7289	9.58826	946.822	1113
jgi|Phlrad1|132217|minus.g3817.t1	S07_quant	1775.59	1070.23	276.296	438
jgi|Phlrad1|132217|minus.g3817.t1	S08_quant	1742.36	1031.01	284.668	438
jgi|Phlrad1|132217|minus.g3817.t1	S09_quant	1707.69	1024.64	278.872	438
jgi|Phlrad1|132217|minus.g3817.t1	S10_quant	2332.81	1385.56	282.711	438
jgi|Phlrad1|132217|minus.g3817.t1	S11_quant	2043.76	1194.82	290.3	438
jgi|Phlrad1|132217|minus.g3817.t1	S12_quant	1866.37	1130.61	273.827	438
jgi|Phlrad1|132218|minus.g3818.t1	S07_quant	80.9304	19.8308	679.642	843
jgi|Phlrad1|132218|minus.g3818.t1	S08_quant	118.255	28.9399	688.318	843
jgi|Phlrad1|132218|minus.g3818.t1	S09_quant	97.0276	23.8003	682.153	843
jgi|Phlrad1|132218|minus.g3818.t1	S10_quant	144.318	35.2885	686.716	843
jgi|Phlrad1|132218|minus.g3818.t1	S11_quant	121.119	29.6272	693.81	843
jgi|Phlrad1|132218|minus.g3818.t1	S12_quant	78.1842	19.1618	676.822	843
jgi|Phlrad1|132219|plus.g3855.t1	S07_quant	297.395	239.119	207.124	366
jgi|Phlrad1|132219|plus.g3855.t1	S08_quant	284.194	221.569	216.059	366
jgi|Phlrad1|132219|plus.g3855.t1	S09_quant	252.272	200.278	210.768	366
jgi|Phlrad1|132219|plus.g3855.t1	S10_quant	301.486	237.538	213.12	366
jgi|Phlrad1|132219|plus.g3855.t1	S11_quant	355.727	273.249	220.942	366
jgi|Phlrad1|132219|plus.g3855.t1	S12_quant	377.518	305.853	204.747	366
jgi|Phlrad1|132220|plus.g3856.t1	S07_quant	1505.5	507.844	493.696	657
jgi|Phlrad1|132220|plus.g3856.t1	S08_quant	1303.67	437.174	502.318	657
jgi|Phlrad1|132220|plus.g3856.t1	S09_quant	1354.3	456.687	496.21	657
jgi|Phlrad1|132220|plus.g3856.t1	S10_quant	1778.27	596.283	500.767	657
jgi|Phlrad1|132220|plus.g3856.t1	S11_quant	1675.63	559.953	507.864	657
jgi|Phlrad1|132220|plus.g3856.t1	S12_quant	1911.04	645.86	490.822	657
jgi|Phlrad1|132221|plus.g3857.t1	S07_quant	58.5039	7.12918	1366.64	1530
jgi|Phlrad1|132221|plus.g3857.t1	S08_quant	63.8961	7.82594	1375.32	1530
jgi|Phlrad1|132221|plus.g3857.t1	S09_quant	51.0672	6.24107	1369.15	1530
jgi|Phlrad1|132221|plus.g3857.t1	S10_quant	57.3317	7.0079	1373.72	1530
jgi|Phlrad1|132221|plus.g3857.t1	S11_quant	68.6657	8.43967	1380.81	1530
jgi|Phlrad1|132221|plus.g3857.t1	S12_quant	72.5996	8.83015	1363.82	1530
jgi|Phlrad1|132222|minus.g3822.t1	S07_quant	420.253	60.8247	1150.64	1314
jgi|Phlrad1|132222|minus.g3822.t1	S08_quant	419.616	60.9698	1159.32	1314
jgi|Phlrad1|132222|minus.g3822.t1	S09_quant	456.541	66.2462	1153.15	1314
jgi|Phlrad1|132222|minus.g3822.t1	S10_quant	429	62.2221	1157.72	1314
jgi|Phlrad1|132222|minus.g3822.t1	S11_quant	424.392	61.8346	1164.81	1314
jgi|Phlrad1|132222|minus.g3822.t1	S12_quant	422.194	61.014	1147.82	1314
jgi|Phlrad1|132223|plus.g3859.t1	S07_quant	343.223	79.8711	715.642	879
jgi|Phlrad1|132223|plus.g3859.t1	S08_quant	343.322	79.8432	724.318	879
jgi|Phlrad1|132223|plus.g3859.t1	S09_quant	336.022	78.2924	718.153	879
jgi|Phlrad1|132223|plus.g3859.t1	S10_quant	318.29	73.9512	722.716	879
jgi|Phlrad1|132223|plus.g3859.t1	S11_quant	353.819	82.2794	729.81	879
jgi|Phlrad1|132223|plus.g3859.t1	S12_quant	352.946	82.1331	712.822	879
jgi|Phlrad1|132224|plus.g3860.t1	S07_quant	126.758	28.5407	739.642	903
jgi|Phlrad1|132224|plus.g3860.t1	S08_quant	130.653	29.4103	748.318	903
jgi|Phlrad1|132224|plus.g3860.t1	S09_quant	76.6008	17.2706	742.153	903
jgi|Phlrad1|132224|plus.g3860.t1	S10_quant	223.396	50.2354	746.716	903
jgi|Phlrad1|132224|plus.g3860.t1	S11_quant	282.292	63.556	753.81	903
jgi|Phlrad1|132224|plus.g3860.t1	S12_quant	184.291	41.4891	736.822	903
jgi|Phlrad1|132225|minus.g3825.t1	S07_quant	82.8805	15.727	877.642	1041
jgi|Phlrad1|132225|minus.g3825.t1	S08_quant	109.672	20.8436	886.318	1041
jgi|Phlrad1|132225|minus.g3825.t1	S09_quant	85.7929	16.3103	880.153	1041
jgi|Phlrad1|132225|minus.g3825.t1	S10_quant	71.1704	13.5078	884.716	1041
jgi|Phlrad1|132225|minus.g3825.t1	S11_quant	83.9248	15.9712	891.81	1041
jgi|Phlrad1|132225|minus.g3825.t1	S12_quant	100.522	19.0605	874.822	1041
jgi|Phlrad1|132226|plus.g3862.t1	S07_quant	44.853	5.69055	1312.64	1476
jgi|Phlrad1|132226|plus.g3862.t1	S08_quant	31.4712	4.01209	1321.32	1476
jgi|Phlrad1|132226|plus.g3862.t1	S09_quant	31.6617	4.02834	1315.15	1476
jgi|Phlrad1|132226|plus.g3862.t1	S10_quant	32.6198	4.1504	1319.72	1476
jgi|Phlrad1|132226|plus.g3862.t1	S11_quant	25.7496	3.29368	1326.81	1476
jgi|Phlrad1|132226|plus.g3862.t1	S12_quant	26.806	3.39478	1309.82	1476
jgi|Phlrad1|132227|minus.g3827.t1	S07_quant	308.121	50.9748	1006.64	1170
jgi|Phlrad1|132227|minus.g3827.t1	S08_quant	246.048	40.8209	1015.32	1170
jgi|Phlrad1|132227|minus.g3827.t1	S09_quant	308.446	51.1435	1009.15	1170
jgi|Phlrad1|132227|minus.g3827.t1	S10_quant	564.421	93.4925	1013.72	1170
jgi|Phlrad1|132227|minus.g3827.t1	S11_quant	609.887	101.397	1020.81	1170
jgi|Phlrad1|132227|minus.g3827.t1	S12_quant	825.401	136.395	1003.82	1170
jgi|Phlrad1|132228|minus.g3828.t1	S07_quant	15.601	13.8458	187.649	345
jgi|Phlrad1|132228|minus.g3828.t1	S08_quant	11.4441	9.79751	196.757	345
jgi|Phlrad1|132228|minus.g3828.t1	S09_quant	21.4482	18.7684	191.22	345
jgi|Phlrad1|132228|minus.g3828.t1	S10_quant	7.90783	6.8809	192.975	345
jgi|Phlrad1|132228|minus.g3828.t1	S11_quant	9.5369	8.03589	201.416	345
jgi|Phlrad1|132228|minus.g3828.t1	S12_quant	7.81842	6.99492	185.408	345
jgi|Phlrad1|132229|minus.g3829.t1	S07_quant	532.386	39.324	2254.64	2418
jgi|Phlrad1|132229|minus.g3829.t1	S08_quant	501.632	37.334	2263.32	2418
jgi|Phlrad1|132229|minus.g3829.t1	S09_quant	504.544	37.403	2257.15	2418
jgi|Phlrad1|132229|minus.g3829.t1	S10_quant	462.608	34.3451	2261.72	2418
jgi|Phlrad1|132229|minus.g3829.t1	S11_quant	492.104	36.8111	2268.81	2418
jgi|Phlrad1|132229|minus.g3829.t1	S12_quant	481.391	35.4614	2251.82	2418
jgi|Phlrad1|132230|minus.g3830.t1	S07_quant	319.821	22.5434	2362.64	2526
jgi|Phlrad1|132230|minus.g3830.t1	S08_quant	431.06	30.6206	2371.32	2526
jgi|Phlrad1|132230|minus.g3830.t1	S09_quant	469.818	33.2383	2365.15	2526
jgi|Phlrad1|132230|minus.g3830.t1	S10_quant	347.944	24.6549	2369.72	2526
jgi|Phlrad1|132230|minus.g3830.t1	S11_quant	359.541	25.6728	2376.81	2526
jgi|Phlrad1|132230|minus.g3830.t1	S12_quant	442.299	31.0905	2359.82	2526
jgi|Phlrad1|132231|plus.g3866.t2	S07_quant	650.059	76.204	1420.64	1584
jgi|Phlrad1|132231|plus.g3866.t2	S08_quant	602.878	71.0503	1429.32	1584
jgi|Phlrad1|132231|plus.g3866.t2	S09_quant	547.505	64.3732	1423.15	1584
jgi|Phlrad1|132231|plus.g3866.t2	S10_quant	560.308	65.8984	1427.72	1584
jgi|Phlrad1|132231|plus.g3866.t2	S11_quant	684.265	80.9374	1434.81	1584
jgi|Phlrad1|132231|plus.g3866.t2	S12_quant	569.081	66.58	1417.82	1584
jgi|Phlrad1|132232|plus.g3866.t1	S07_quant	849.591	99.3844	1423.64	1587
jgi|Phlrad1|132232|plus.g3866.t1	S08_quant	861.009	101.259	1432.32	1587
jgi|Phlrad1|132232|plus.g3866.t1	S09_quant	887.483	104.127	1426.15	1587
jgi|Phlrad1|132232|plus.g3866.t1	S10_quant	946.133	111.042	1430.72	1587
jgi|Phlrad1|132232|plus.g3866.t1	S11_quant	847.362	100.02	1437.81	1587
jgi|Phlrad1|132232|plus.g3866.t1	S12_quant	1067.2	124.594	1420.82	1587
jgi|Phlrad1|132233|minus.g3832.t1	S07_quant	91.6561	16.3315	934.642	1098
jgi|Phlrad1|132233|minus.g3832.t1	S08_quant	107.765	19.2435	943.318	1098
jgi|Phlrad1|132233|minus.g3832.t1	S09_quant	85.7929	15.3183	937.153	1098
jgi|Phlrad1|132233|minus.g3832.t1	S10_quant	54.3663	9.69393	941.716	1098
jgi|Phlrad1|132233|minus.g3832.t1	S11_quant	61.9899	11.0882	948.81	1098
jgi|Phlrad1|132233|minus.g3832.t1	S12_quant	65.8981	11.7309	931.822	1098
jgi|Phlrad1|132234|minus.g3833.t1	S07_quant	1196.4	51.6628	3856.64	4020
jgi|Phlrad1|132234|minus.g3833.t1	S08_quant	1275.06	55.5662	3865.32	4020
jgi|Phlrad1|132234|minus.g3833.t1	S09_quant	1420.69	61.5993	3859.15	4020
jgi|Phlrad1|132234|minus.g3833.t1	S10_quant	1653.72	71.87	3863.72	4020
jgi|Phlrad1|132234|minus.g3833.t1	S11_quant	1503.02	65.8993	3870.81	4020
jgi|Phlrad1|132234|minus.g3833.t1	S12_quant	1684.31	72.4973	3853.82	4020
jgi|Phlrad1|132235|plus.g3869.t1	S07_quant	260.342	115.035	376.899	540
jgi|Phlrad1|132235|plus.g3869.t1	S08_quant	209.808	91.6914	385.442	540
jgi|Phlrad1|132235|plus.g3869.t1	S09_quant	184.863	81.5092	379.501	540
jgi|Phlrad1|132235|plus.g3869.t1	S10_quant	196.707	86.0111	384.021	540
jgi|Phlrad1|132235|plus.g3869.t1	S11_quant	185.97	80.6866	391.165	540
jgi|Phlrad1|132235|plus.g3869.t1	S12_quant	217.799	96.571	374.111	540
jgi|Phlrad1|132236|plus.g3870.t1	S07_quant	135.534	73.8731	305.543	468
jgi|Phlrad1|132236|plus.g3870.t1	S08_quant	100.136	53.6801	314.225	468
jgi|Phlrad1|132236|plus.g3870.t1	S09_quant	110.305	59.8533	308.373	468
jgi|Phlrad1|132236|plus.g3870.t1	S10_quant	118.617	63.7591	312.389	468
jgi|Phlrad1|132236|plus.g3870.t1	S11_quant	146.868	77.9528	319.754	468
jgi|Phlrad1|132236|plus.g3870.t1	S12_quant	185.408	101.448	303.163	468
jgi|Phlrad1|132237|plus.g3871.t1	S07_quant	907.786	92.2027	1639.64	1803
jgi|Phlrad1|132237|plus.g3871.t1	S08_quant	1010.89	103.307	1648.32	1803
jgi|Phlrad1|132237|plus.g3871.t1	S09_quant	985.597	100.428	1642.15	1803
jgi|Phlrad1|132237|plus.g3871.t1	S10_quant	1041.86	106.238	1646.72	1803
jgi|Phlrad1|132237|plus.g3871.t1	S11_quant	1044.29	107.166	1653.81	1803
jgi|Phlrad1|132237|plus.g3871.t1	S12_quant	1049.9	106.399	1636.82	1803
jgi|Phlrad1|132238|plus.g3872.t1	S07_quant	2124.67	57.3788	6166.64	6330
jgi|Phlrad1|132238|plus.g3872.t1	S08_quant	2184.86	59.5978	6175.32	6330
jgi|Phlrad1|132238|plus.g3872.t1	S09_quant	2283.72	61.9423	6169.15	6330
jgi|Phlrad1|132238|plus.g3872.t1	S10_quant	2162.79	58.8244	6173.72	6330
jgi|Phlrad1|132238|plus.g3872.t1	S11_quant	2055.2	56.4324	6180.81	6330
jgi|Phlrad1|132238|plus.g3872.t1	S12_quant	2275.16	61.2284	6163.82	6330
jgi|Phlrad1|132239|minus.g3838.t1	S07_quant	385.151	24.9032	2575.64	2739
jgi|Phlrad1|132239|minus.g3838.t1	S08_quant	404.357	26.3563	2584.32	2739
jgi|Phlrad1|132239|minus.g3838.t1	S09_quant	395.26	25.6533	2578.15	2739
jgi|Phlrad1|132239|minus.g3838.t1	S10_quant	346.956	22.5573	2582.72	2739
jgi|Phlrad1|132239|minus.g3838.t1	S11_quant	365.263	23.9363	2589.81	2739
jgi|Phlrad1|132239|minus.g3838.t1	S12_quant	402.09	25.9242	2572.82	2739
jgi|Phlrad1|132240|plus.g3874.t1	S07_quant	26.3268	3.95472	1108.64	1272
jgi|Phlrad1|132240|plus.g3874.t1	S08_quant	25.7492	3.88196	1117.32	1272
jgi|Phlrad1|132240|plus.g3874.t1	S09_quant	26.5549	3.9989	1111.15	1272
jgi|Phlrad1|132240|plus.g3874.t1	S10_quant	34.5967	5.20681	1115.72	1272
jgi|Phlrad1|132240|plus.g3874.t1	S11_quant	17.1664	2.59473	1122.81	1272
jgi|Phlrad1|132240|plus.g3874.t1	S12_quant	26.806	4.02104	1105.82	1272
jgi|Phlrad1|132241|plus.g3875.t1	S07_quant	255.467	33.6416	1264.64	1428
jgi|Phlrad1|132241|plus.g3875.t1	S08_quant	269.889	35.7038	1273.32	1428
jgi|Phlrad1|132241|plus.g3875.t1	S09_quant	275.763	36.4146	1267.15	1428
jgi|Phlrad1|132241|plus.g3875.t1	S10_quant	313.348	41.3739	1271.72	1428
jgi|Phlrad1|132241|plus.g3875.t1	S11_quant	374.8	49.7409	1278.81	1428
jgi|Phlrad1|132241|plus.g3875.t1	S12_quant	419.961	55.208	1261.82	1428
jgi|Phlrad1|132242|plus.g3876.t1	S07_quant	1015.04	164.495	1027.64	1191
jgi|Phlrad1|132242|plus.g3876.t1	S08_quant	1288.41	209.424	1036.32	1191
jgi|Phlrad1|132242|plus.g3876.t1	S09_quant	1358.39	220.643	1030.15	1191
jgi|Phlrad1|132242|plus.g3876.t1	S10_quant	1727.86	280.4	1034.72	1191
jgi|Phlrad1|132242|plus.g3876.t1	S11_quant	1831.09	298.291	1041.81	1191
jgi|Phlrad1|132242|plus.g3876.t1	S12_quant	1676.49	271.359	1024.82	1191
jgi|Phlrad1|132243|minus.g3842.t1	S07_quant	126.758	20.6022	1024.64	1188
jgi|Phlrad1|132243|minus.g3842.t1	S08_quant	106.811	17.412	1033.32	1188
jgi|Phlrad1|132243|minus.g3842.t1	S09_quant	98.049	15.9726	1027.15	1188
jgi|Phlrad1|132243|minus.g3842.t1	S10_quant	103.79	16.8922	1031.72	1188
jgi|Phlrad1|132243|minus.g3842.t1	S11_quant	94.4153	15.425	1038.81	1188
jgi|Phlrad1|132243|minus.g3842.t1	S12_quant	127.328	20.6701	1021.82	1188
jgi|Phlrad1|132244|plus.g3878.t1	S07_quant	595.765	41.9939	2362.64	2526
jgi|Phlrad1|132244|plus.g3878.t1	S08_quant	528.335	37.5305	2371.32	2526
jgi|Phlrad1|132244|plus.g3878.t1	S09_quant	589.315	41.6924	2365.15	2526
jgi|Phlrad1|132244|plus.g3878.t1	S10_quant	559.479	39.644	2369.72	2526
jgi|Phlrad1|132244|plus.g3878.t1	S11_quant	619.899	44.2635	2376.81	2526
jgi|Phlrad1|132244|plus.g3878.t1	S12_quant	574.095	40.3549	2359.82	2526
jgi|Phlrad1|132245|minus.g3844.t1	S07_quant	241.816	29.9271	1345.64	1509
jgi|Phlrad1|132245|minus.g3844.t1	S08_quant	238.418	29.654	1354.32	1509
jgi|Phlrad1|132245|minus.g3844.t1	S09_quant	243.08	30.1702	1348.15	1509
jgi|Phlrad1|132245|minus.g3844.t1	S10_quant	234.269	29.0803	1352.72	1509
jgi|Phlrad1|132245|minus.g3844.t1	S11_quant	232.7	29.0428	1359.81	1509
jgi|Phlrad1|132245|minus.g3844.t1	S12_quant	198.811	24.5592	1342.82	1509
jgi|Phlrad1|132246|minus.g3845.t1	S07_quant	113.108	12.062	1561.64	1725
jgi|Phlrad1|132246|minus.g3845.t1	S08_quant	123.024	13.1967	1570.32	1725
jgi|Phlrad1|132246|minus.g3845.t1	S09_quant	110.305	11.8001	1564.15	1725
jgi|Phlrad1|132246|minus.g3845.t1	S10_quant	139.375	14.9187	1568.72	1725
jgi|Phlrad1|132246|minus.g3845.t1	S11_quant	111.582	12.0174	1575.81	1725
jgi|Phlrad1|132246|minus.g3845.t1	S12_quant	120.627	12.8363	1558.82	1725
jgi|Phlrad1|132247|minus.g3846.t1	S07_quant	35.7637	43.5962	136.617	288
jgi|Phlrad1|132247|minus.g3846.t1	S08_quant	46.3886	53.3503	146.467	288
jgi|Phlrad1|132247|minus.g3846.t1	S09_quant	40.3662	47.507	142.177	288
jgi|Phlrad1|132247|minus.g3846.t1	S10_quant	51.77	61.4774	141.401	288
jgi|Phlrad1|132247|minus.g3846.t1	S11_quant	39.1717	44.1075	150.723	288
jgi|Phlrad1|132247|minus.g3846.t1	S12_quant	27.9676	34.2427	135.481	288
jgi|Phlrad1|132248|plus.g3880.t1	S07_quant	17.8648	37.7911	78.7261	213
jgi|Phlrad1|132248|plus.g3880.t1	S08_quant	11.7854	22.2956	89.0408	213
jgi|Phlrad1|132248|plus.g3880.t1	S09_quant	7.63693	14.8929	85.8044	213
jgi|Phlrad1|132248|plus.g3880.t1	S10_quant	5.56175	11.4188	81.7864	213
jgi|Phlrad1|132248|plus.g3880.t1	S11_quant	11.3739	20.8553	92.5579	213
jgi|Phlrad1|132248|plus.g3880.t1	S12_quant	7.77375	16.1144	80.0216	213
jgi|Phlrad1|132249|plus.g3881.t1	S07_quant	256.442	26.3844	1618.64	1782
jgi|Phlrad1|132249|plus.g3881.t1	S08_quant	272.75	28.2331	1627.32	1782
jgi|Phlrad1|132249|plus.g3881.t1	S09_quant	249.208	25.7221	1621.15	1782
jgi|Phlrad1|132249|plus.g3881.t1	S10_quant	213.511	22.0529	1625.72	1782
jgi|Phlrad1|132249|plus.g3881.t1	S11_quant	239.376	24.8808	1632.81	1782
jgi|Phlrad1|132249|plus.g3881.t1	S12_quant	233.436	23.9643	1615.82	1782
jgi|Phlrad1|132250|minus.g3848.t1	S07_quant	138.459	15.7974	1459.64	1623
jgi|Phlrad1|132250|minus.g3848.t1	S08_quant	131.607	15.0981	1468.32	1623
jgi|Phlrad1|132250|minus.g3848.t1	S09_quant	115.412	13.2077	1462.15	1623
jgi|Phlrad1|132250|minus.g3848.t1	S10_quant	111.698	12.7876	1466.72	1623
jgi|Phlrad1|132250|minus.g3848.t1	S11_quant	131.609	15.1553	1473.81	1623
jgi|Phlrad1|132250|minus.g3848.t1	S12_quant	169.771	19.3308	1456.82	1623
jgi|Phlrad1|132251|minus.g3849.t1	S07_quant	27.2693	1.80524	2515.64	2679
jgi|Phlrad1|132251|minus.g3849.t1	S08_quant	69.0535	4.60794	2524.32	2679
jgi|Phlrad1|132251|minus.g3849.t1	S09_quant	47.904	3.18316	2518.15	2679
jgi|Phlrad1|132251|minus.g3849.t1	S10_quant	60.0608	3.99773	2522.72	2679
jgi|Phlrad1|132251|minus.g3849.t1	S11_quant	77.9445	5.22898	2529.81	2679
jgi|Phlrad1|132251|minus.g3849.t1	S12_quant	67.3023	4.44283	2512.82	2679
jgi|Phlrad1|132252|minus.g3849.t2	S07_quant	245.421	15.9428	2563.64	2727
jgi|Phlrad1|132252|minus.g3849.t2	S08_quant	232.986	15.257	2572.32	2727
jgi|Phlrad1|132252|minus.g3849.t2	S09_quant	268.871	17.5319	2566.15	2727
jgi|Phlrad1|132252|minus.g3849.t2	S10_quant	165.693	10.8228	2570.72	2727
jgi|Phlrad1|132252|minus.g3849.t2	S11_quant	221.345	14.5727	2577.81	2727
jgi|Phlrad1|132252|minus.g3849.t2	S12_quant	242.983	15.7394	2560.82	2727
jgi|Phlrad1|132253|minus.g3849.t3	S07_quant	115.386	7.48679	2566.64	2730
jgi|Phlrad1|132253|minus.g3849.t3	S08_quant	140.465	9.18758	2575.32	2730
jgi|Phlrad1|132253|minus.g3849.t3	S09_quant	130.574	8.50424	2569.15	2730
jgi|Phlrad1|132253|minus.g3849.t3	S10_quant	150.856	9.8422	2573.72	2730
jgi|Phlrad1|132253|minus.g3849.t3	S11_quant	106.028	6.97245	2580.81	2730
jgi|Phlrad1|132253|minus.g3849.t3	S12_quant	118.611	7.67411	2563.82	2730
jgi|Phlrad1|132254|plus.g3884.t1	S07_quant	221.34	28.146	1309.64	1473
jgi|Phlrad1|132254|plus.g3884.t1	S08_quant	218.391	27.9049	1318.32	1473
jgi|Phlrad1|132254|plus.g3884.t1	S09_quant	223.674	28.5233	1312.15	1473
jgi|Phlrad1|132254|plus.g3884.t1	S10_quant	169.03	21.5556	1316.72	1473
jgi|Phlrad1|132254|plus.g3884.t1	S11_quant	149.729	19.1956	1323.81	1473
jgi|Phlrad1|132254|plus.g3884.t1	S12_quant	194.343	24.6686	1306.82	1473
jgi|Phlrad1|132255|minus.g3851.t1	S07_quant	69.2296	70.6984	163.077	318
jgi|Phlrad1|132255|minus.g3851.t1	S08_quant	73.4328	71.7765	172.335	318
jgi|Phlrad1|132255|minus.g3851.t1	S09_quant	70.4727	70.3775	167.554	318
jgi|Phlrad1|132255|minus.g3851.t1	S10_quant	73.1474	73.0529	168.132	318
jgi|Phlrad1|132255|minus.g3851.t1	S11_quant	60.0825	57.6639	176.833	318
jgi|Phlrad1|132255|minus.g3851.t1	S12_quant	62.5473	64.2849	161.395	318
jgi|Phlrad1|132256|minus.g3852.t1	S07_quant	535.311	26.1691	3406.64	3570
jgi|Phlrad1|132256|minus.g3852.t1	S08_quant	567.435	27.9866	3415.32	3570
jgi|Phlrad1|132256|minus.g3852.t1	S09_quant	556.632	27.3206	3409.15	3570
jgi|Phlrad1|132256|minus.g3852.t1	S10_quant	593.087	29.173	3413.72	3570
jgi|Phlrad1|132256|minus.g3852.t1	S11_quant	530.252	26.3071	3420.81	3570
jgi|Phlrad1|132256|minus.g3852.t1	S12_quant	564.043	27.4876	3403.82	3570
jgi|Phlrad1|132257|plus.g3886.t1	S07_quant	272.043	78.4311	577.642	741
jgi|Phlrad1|132257|plus.g3886.t1	S08_quant	211.715	60.8253	586.318	741
jgi|Phlrad1|132257|plus.g3886.t1	S09_quant	206.311	59.5044	580.153	741
jgi|Phlrad1|132257|plus.g3886.t1	S10_quant	221.419	63.5858	584.716	741
jgi|Phlrad1|132257|plus.g3886.t1	S11_quant	196.46	56.3393	591.81	741
jgi|Phlrad1|132257|plus.g3886.t1	S12_quant	237.903	68.6528	574.822	741
jgi|Phlrad1|132258|plus.g3887.t1	S07_quant	15.601	1.42314	1825.64	1989
jgi|Phlrad1|132258|plus.g3887.t1	S08_quant	20.9808	1.92669	1834.32	1989
jgi|Phlrad1|132258|plus.g3887.t1	S09_quant	27.5763	2.52402	1828.15	1989
jgi|Phlrad1|132258|plus.g3887.t1	S10_quant	24.712	2.26413	1832.72	1989
jgi|Phlrad1|132258|plus.g3887.t1	S11_quant	21.9349	2.0234	1839.81	1989
jgi|Phlrad1|132258|plus.g3887.t1	S12_quant	18.9876	1.72789	1822.82	1989
jgi|Phlrad1|132259|plus.g3888.t1	S07_quant	64.3543	40.9401	261.781	423
jgi|Phlrad1|132259|plus.g3888.t1	S08_quant	82.0158	51.1418	270.139	423
jgi|Phlrad1|132259|plus.g3888.t1	S09_quant	105.198	66.605	264.284	423
jgi|Phlrad1|132259|plus.g3888.t1	S10_quant	97.8593	61.3354	267.905	423
jgi|Phlrad1|132259|plus.g3888.t1	S11_quant	79.1563	48.7377	275.638	423
jgi|Phlrad1|132259|plus.g3888.t1	S12_quant	78.1842	50.0454	259.147	423
jgi|Phlrad1|132260|minus.g3855.t1	S07_quant	1564	115.217	2260.64	2424
jgi|Phlrad1|132260|minus.g3855.t1	S08_quant	2593.04	192.477	2269.32	2424
jgi|Phlrad1|132260|minus.g3855.t1	S09_quant	3113.06	230.166	2263.15	2424
jgi|Phlrad1|132260|minus.g3855.t1	S10_quant	1986.84	147.118	2267.72	2424
jgi|Phlrad1|132260|minus.g3855.t1	S11_quant	2214.47	165.213	2274.81	2424
jgi|Phlrad1|132260|minus.g3855.t1	S12_quant	2623.64	192.755	2257.82	2424
jgi|Phlrad1|132261|minus.g3856.t1	S07_quant	96.5314	19.8803	808.642	972
jgi|Phlrad1|132261|minus.g3856.t1	S08_quant	113.487	23.3895	817.318	972
jgi|Phlrad1|132261|minus.g3856.t1	S09_quant	110.305	22.7542	811.153	972
jgi|Phlrad1|132261|minus.g3856.t1	S10_quant	133.445	27.4696	815.716	972
jgi|Phlrad1|132261|minus.g3856.t1	S11_quant	130.656	26.9493	822.81	972
jgi|Phlrad1|132261|minus.g3856.t1	S12_quant	103.873	21.3824	805.822	972
jgi|Phlrad1|132262|minus.g3857.t1	S07_quant	35.4924	14.8564	397.862	561
jgi|Phlrad1|132262|minus.g3857.t1	S08_quant	53.438	22.1515	406.362	561
jgi|Phlrad1|132262|minus.g3857.t1	S09_quant	65.8848	27.5345	400.384	561
jgi|Phlrad1|132262|minus.g3857.t1	S10_quant	65.8722	27.3121	404.983	561
jgi|Phlrad1|132262|minus.g3857.t1	S11_quant	70.0415	28.8434	412.124	561
jgi|Phlrad1|132262|minus.g3857.t1	S12_quant	44.1318	18.535	394.958	561
jgi|Phlrad1|132263|minus.g3858.t1	S07_quant	141.923	22.0966	1069.64	1233
jgi|Phlrad1|132263|minus.g3858.t1	S08_quant	149.004	23.2764	1078.32	1233
jgi|Phlrad1|132263|minus.g3858.t1	S09_quant	139.035	21.6988	1072.15	1233
jgi|Phlrad1|132263|minus.g3858.t1	S10_quant	205.219	32.0041	1076.72	1233
jgi|Phlrad1|132263|minus.g3858.t1	S11_quant	159.519	24.9793	1083.81	1233
jgi|Phlrad1|132263|minus.g3858.t1	S12_quant	114.661	17.8285	1066.82	1233
jgi|Phlrad1|132264|minus.g3859.t1	S07_quant	134.637	14.4411	1552.64	1716
jgi|Phlrad1|132264|minus.g3859.t1	S08_quant	140.678	15.1775	1561.32	1716
jgi|Phlrad1|132264|minus.g3859.t1	S09_quant	111.249	11.9699	1555.15	1716
jgi|Phlrad1|132264|minus.g3859.t1	S10_quant	113.43	12.2116	1559.72	1716
jgi|Phlrad1|132264|minus.g3859.t1	S11_quant	111.637	12.0924	1566.81	1716
jgi|Phlrad1|132264|minus.g3859.t1	S12_quant	113.737	12.1734	1549.82	1716
jgi|Phlrad1|132265|minus.g3860.t1	S07_quant	1320.24	130.05	1690.64	1854
jgi|Phlrad1|132265|minus.g3860.t1	S08_quant	1260.76	124.975	1699.32	1854
jgi|Phlrad1|132265|minus.g3860.t1	S09_quant	1364.52	134.85	1693.15	1854
jgi|Phlrad1|132265|minus.g3860.t1	S10_quant	1288.98	127.488	1697.72	1854
jgi|Phlrad1|132265|minus.g3860.t1	S11_quant	1346.61	134.056	1704.81	1854
jgi|Phlrad1|132265|minus.g3860.t1	S12_quant	1340.3	131.725	1687.82	1854
jgi|Phlrad1|132266|plus.g3894.t1	S07_quant	1097.92	151.783	1204.64	1368
jgi|Phlrad1|132266|plus.g3894.t1	S08_quant	933.645	129.62	1213.32	1368
jgi|Phlrad1|132266|plus.g3894.t1	S09_quant	911.038	126.283	1207.15	1368
jgi|Phlrad1|132266|plus.g3894.t1	S10_quant	836.253	115.885	1211.72	1368
jgi|Phlrad1|132266|plus.g3894.t1	S11_quant	926.033	128.947	1218.81	1368
jgi|Phlrad1|132266|plus.g3894.t1	S12_quant	912.521	125.949	1201.82	1368
jgi|Phlrad1|132267|plus.g3895.t1	S07_quant	1.95013	0.728676	445.696	609
jgi|Phlrad1|132267|plus.g3895.t1	S08_quant	1.90735	0.707188	454.318	609
jgi|Phlrad1|132267|plus.g3895.t1	S09_quant	8.17075	3.05003	448.257	609
jgi|Phlrad1|132267|plus.g3895.t1	S10_quant	2.96543	1.09977	452.767	609
jgi|Phlrad1|132267|plus.g3895.t1	S11_quant	1.90738	0.703855	459.91	609
jgi|Phlrad1|132267|plus.g3895.t1	S12_quant	7.81842	2.92812	442.915	609
jgi|Phlrad1|132268|plus.g3896.t1	S07_quant	8.77559	15.6319	93.4918	234
jgi|Phlrad1|132268|plus.g3896.t1	S08_quant	7.62938	12.3736	103.863	234
jgi|Phlrad1|132268|plus.g3896.t1	S09_quant	4.08537	6.82917	100.1	234
jgi|Phlrad1|132268|plus.g3896.t1	S10_quant	0	0	97.0833	234
jgi|Phlrad1|132268|plus.g3896.t1	S11_quant	4.76845	7.51742	107.653	234
jgi|Phlrad1|132268|plus.g3896.t1	S12_quant	2.23383	3.94937	93.824	234
jgi|Phlrad1|132269|plus.g3897.t1	S07_quant	21.4514	7.41639	481.696	645
jgi|Phlrad1|132269|plus.g3897.t1	S08_quant	11.4441	3.93159	490.318	645
jgi|Phlrad1|132269|plus.g3897.t1	S09_quant	27.5763	9.52951	484.21	645
jgi|Phlrad1|132269|plus.g3897.t1	S10_quant	10.8733	3.73549	488.767	645
jgi|Phlrad1|132269|plus.g3897.t1	S11_quant	5.72214	1.95846	495.864	645
jgi|Phlrad1|132269|plus.g3897.t1	S12_quant	10.0522	3.48206	478.871	645
jgi|Phlrad1|132270|plus.g3898.t1	S07_quant	0	0	329.32	492
jgi|Phlrad1|132270|plus.g3898.t1	S08_quant	0	0	337.869	492
jgi|Phlrad1|132270|plus.g3898.t1	S09_quant	0	0	331.923	492
jgi|Phlrad1|132270|plus.g3898.t1	S10_quant	0	0	336.164	492
jgi|Phlrad1|132270|plus.g3898.t1	S11_quant	0	0	343.52	492
jgi|Phlrad1|132270|plus.g3898.t1	S12_quant	0	0	326.596	492
jgi|Phlrad1|132271|minus.g3864.t1	S07_quant	66.3044	7.95746	1387.64	1551
jgi|Phlrad1|132271|minus.g3864.t1	S08_quant	58.174	7.01795	1396.32	1551
jgi|Phlrad1|132271|minus.g3864.t1	S09_quant	45.9605	5.53211	1390.15	1551
jgi|Phlrad1|132271|minus.g3864.t1	S10_quant	59.3087	7.1404	1394.72	1551
jgi|Phlrad1|132271|minus.g3864.t1	S11_quant	72.4805	8.77508	1401.81	1551
jgi|Phlrad1|132271|minus.g3864.t1	S12_quant	70.3657	8.42867	1384.82	1551
jgi|Phlrad1|132272|plus.g3900.t1	S07_quant	313.971	17.4197	3001.64	3165
jgi|Phlrad1|132272|plus.g3900.t1	S08_quant	385.284	21.5592	3010.32	3165
jgi|Phlrad1|132272|plus.g3900.t1	S09_quant	402.409	22.4138	3004.15	3165
jgi|Phlrad1|132272|plus.g3900.t1	S10_quant	368.702	20.5771	3008.72	3165
jgi|Phlrad1|132272|plus.g3900.t1	S11_quant	353.819	19.9112	3015.81	3165
jgi|Phlrad1|132272|plus.g3900.t1	S12_quant	356.296	19.7084	2998.82	3165
jgi|Phlrad1|132273|plus.g3901.t1	S07_quant	152.11	20.3201	1246.64	1410
jgi|Phlrad1|132273|plus.g3901.t1	S08_quant	162.124	21.755	1255.32	1410
jgi|Phlrad1|132273|plus.g3901.t1	S09_quant	146.052	19.5642	1249.15	1410
jgi|Phlrad1|132273|plus.g3901.t1	S10_quant	155.191	20.7854	1253.72	1410
jgi|Phlrad1|132273|plus.g3901.t1	S11_quant	140.192	18.871	1260.81	1410
jgi|Phlrad1|132273|plus.g3901.t1	S12_quant	165.304	22.0453	1243.82	1410
jgi|Phlrad1|132274|minus.g3867.t1	S07_quant	52.6535	12.6234	694.642	858
jgi|Phlrad1|132274|minus.g3867.t1	S08_quant	43.8689	10.5068	703.318	858
jgi|Phlrad1|132274|minus.g3867.t1	S09_quant	51.0672	12.257	697.153	858
jgi|Phlrad1|132274|minus.g3867.t1	S10_quant	52.3893	12.5364	701.716	858
jgi|Phlrad1|132274|minus.g3867.t1	S11_quant	29.5644	7.07878	708.81	858
jgi|Phlrad1|132274|minus.g3867.t1	S12_quant	46.9105	11.2478	691.822	858
jgi|Phlrad1|132275|minus.g3868.t1	S07_quant	122.858	5.69984	3589.64	3753
jgi|Phlrad1|132275|minus.g3868.t1	S08_quant	126.838	5.93768	3598.32	3753
jgi|Phlrad1|132275|minus.g3868.t1	S09_quant	119.497	5.56637	3592.15	3753
jgi|Phlrad1|132275|minus.g3868.t1	S10_quant	138.387	6.46069	3596.72	3753
jgi|Phlrad1|132275|minus.g3868.t1	S11_quant	145.915	6.87158	3603.81	3753
jgi|Phlrad1|132275|minus.g3868.t1	S12_quant	180.94	8.36792	3586.82	3753
jgi|Phlrad1|132276|plus.g3903.t1	S07_quant	151.135	21.5374	1168.64	1332
jgi|Phlrad1|132276|plus.g3903.t1	S08_quant	135.422	19.3758	1177.32	1332
jgi|Phlrad1|132276|plus.g3903.t1	S09_quant	137.881	19.6998	1171.15	1332
jgi|Phlrad1|132276|plus.g3903.t1	S10_quant	146.295	20.8937	1175.72	1332
jgi|Phlrad1|132276|plus.g3903.t1	S11_quant	159.266	22.8522	1182.81	1332
jgi|Phlrad1|132276|plus.g3903.t1	S12_quant	150.784	21.4543	1165.82	1332
jgi|Phlrad1|132277|plus.g3904.t1	S07_quant	36.0774	12.0963	496.696	660
jgi|Phlrad1|132277|plus.g3904.t1	S08_quant	30.5175	10.173	505.318	660
jgi|Phlrad1|132277|plus.g3904.t1	S09_quant	24.5122	8.21616	499.21	660
jgi|Phlrad1|132277|plus.g3904.t1	S10_quant	26.6889	8.89592	503.767	660
jgi|Phlrad1|132277|plus.g3904.t1	S11_quant	29.5644	9.82163	510.864	660
jgi|Phlrad1|132277|plus.g3904.t1	S12_quant	22.3383	7.50364	493.822	660
jgi|Phlrad1|132278|minus.g3871.t1	S07_quant	679.331	46.1836	2449.64	2613
jgi|Phlrad1|132278|minus.g3871.t1	S08_quant	614.545	42.1096	2458.32	2613
jgi|Phlrad1|132278|minus.g3871.t1	S09_quant	658.147	44.9101	2452.15	2613
jgi|Phlrad1|132278|minus.g3871.t1	S10_quant	557.675	38.1168	2456.72	2613
jgi|Phlrad1|132278|minus.g3871.t1	S11_quant	567.757	39.1088	2463.81	2613
jgi|Phlrad1|132278|minus.g3871.t1	S12_quant	596.166	40.4163	2446.82	2613
jgi|Phlrad1|132279|minus.g3871.t2	S07_quant	22.1252	2.89301	1273.64	1437
jgi|Phlrad1|132279|minus.g3871.t2	S08_quant	0	0	1282.32	1437
jgi|Phlrad1|132279|minus.g3871.t2	S09_quant	8.79074	1.15263	1276.15	1437
jgi|Phlrad1|132279|minus.g3871.t2	S10_quant	8.40005	1.10133	1280.72	1437
jgi|Phlrad1|132279|minus.g3871.t2	S11_quant	5.4109	0.713078	1287.81	1437
jgi|Phlrad1|132279|minus.g3871.t2	S12_quant	15.1748	1.98075	1270.82	1437
jgi|Phlrad1|132280|minus.g3872.t1	S07_quant	214.514	24.2752	1471.64	1635
jgi|Phlrad1|132280|minus.g3872.t1	S08_quant	221.252	25.1766	1480.32	1635
jgi|Phlrad1|132280|minus.g3872.t1	S09_quant	253.293	28.7508	1474.15	1635
jgi|Phlrad1|132280|minus.g3872.t1	S10_quant	255.027	28.9596	1478.72	1635
jgi|Phlrad1|132280|minus.g3872.t1	S11_quant	238.423	27.2335	1485.81	1635
jgi|Phlrad1|132280|minus.g3872.t1	S12_quant	236.786	26.7411	1468.82	1635
jgi|Phlrad1|132281|plus.g3907.t1	S07_quant	425.128	49.2127	1438.64	1602
jgi|Phlrad1|132281|plus.g3907.t1	S08_quant	382.423	44.5087	1447.32	1602
jgi|Phlrad1|132281|plus.g3907.t1	S09_quant	376.876	43.758	1441.15	1602
jgi|Phlrad1|132281|plus.g3907.t1	S10_quant	345.967	40.183	1445.72	1602
jgi|Phlrad1|132281|plus.g3907.t1	S11_quant	366.217	42.7808	1452.81	1602
jgi|Phlrad1|132281|plus.g3907.t1	S12_quant	368.582	42.582	1435.82	1602
jgi|Phlrad1|132282|minus.g3874.t1	S07_quant	2.9252	1.3029	373.899	537
jgi|Phlrad1|132282|minus.g3874.t1	S08_quant	4.76836	2.10024	382.442	537
jgi|Phlrad1|132282|minus.g3874.t1	S09_quant	10.2134	4.5387	376.539	537
jgi|Phlrad1|132282|minus.g3874.t1	S10_quant	6.91935	3.04934	381.021	537
jgi|Phlrad1|132282|minus.g3874.t1	S11_quant	4.76845	2.08488	388.165	537
jgi|Phlrad1|132282|minus.g3874.t1	S12_quant	2.23383	0.998378	371.148	537
jgi|Phlrad1|132283|minus.g3875.t1	S07_quant	64.3543	25.2327	424.739	588
jgi|Phlrad1|132283|minus.g3875.t1	S08_quant	94.4136	36.6985	433.362	588
jgi|Phlrad1|132283|minus.g3875.t1	S09_quant	96.0063	37.5917	427.344	588
jgi|Phlrad1|132283|minus.g3875.t1	S10_quant	92.917	36.1282	431.855	588
jgi|Phlrad1|132283|minus.g3875.t1	S11_quant	105.86	40.9288	438.955	588
jgi|Phlrad1|132283|minus.g3875.t1	S12_quant	81.5349	32.0528	421.958	588
jgi|Phlrad1|132284|minus.g3876.t1	S07_quant	150.48	21.1724	1183.64	1347
jgi|Phlrad1|132284|minus.g3876.t1	S08_quant	185.982	26.275	1192.32	1347
jgi|Phlrad1|132284|minus.g3876.t1	S09_quant	161.005	22.7126	1186.15	1347
jgi|Phlrad1|132284|minus.g3876.t1	S10_quant	160.707	22.663	1190.72	1347
jgi|Phlrad1|132284|minus.g3876.t1	S11_quant	183.886	26.0543	1197.81	1347
jgi|Phlrad1|132284|minus.g3876.t1	S12_quant	167.853	23.5796	1180.82	1347
jgi|Phlrad1|132285|plus.g3910.t1	S07_quant	90.3606	17.9437	838.642	1002
jgi|Phlrad1|132285|plus.g3910.t1	S08_quant	67.6953	13.4579	847.318	1002
jgi|Phlrad1|132285|plus.g3910.t1	S09_quant	68.7974	13.6857	841.153	1002
jgi|Phlrad1|132285|plus.g3910.t1	S10_quant	90.3662	17.942	845.716	1002
jgi|Phlrad1|132285|plus.g3910.t1	S11_quant	73.6106	14.649	852.81	1002
jgi|Phlrad1|132285|plus.g3910.t1	S12_quant	72.2839	14.3456	835.822	1002
jgi|Phlrad1|132286|minus.g3877.t1	S07_quant	157.961	19.2911	1363.64	1527
jgi|Phlrad1|132286|minus.g3877.t1	S08_quant	181.198	22.2415	1372.32	1527
jgi|Phlrad1|132286|minus.g3877.t1	S09_quant	198.141	24.2685	1366.15	1527
jgi|Phlrad1|132286|minus.g3877.t1	S10_quant	193.742	23.7337	1370.72	1527
jgi|Phlrad1|132286|minus.g3877.t1	S11_quant	236.515	29.1333	1377.81	1527
jgi|Phlrad1|132286|minus.g3877.t1	S12_quant	182.057	22.1921	1360.82	1527
jgi|Phlrad1|132287|plus.g3912.t1	S07_quant	2618.05	79.9614	5452.64	5616
jgi|Phlrad1|132287|plus.g3912.t1	S08_quant	2798.08	86.3033	5461.32	5616
jgi|Phlrad1|132287|plus.g3912.t1	S09_quant	3108.97	95.3627	5455.15	5616
jgi|Phlrad1|132287|plus.g3912.t1	S10_quant	3172.03	97.5566	5459.72	5616
jgi|Phlrad1|132287|plus.g3912.t1	S11_quant	3084.23	95.7487	5466.81	5616
jgi|Phlrad1|132287|plus.g3912.t1	S12_quant	2864.89	87.2002	5449.82	5616
jgi|Phlrad1|132288|plus.g3913.t1	S07_quant	24.3766	22.6335	179.362	336
jgi|Phlrad1|132288|plus.g3913.t1	S08_quant	23.8418	21.3158	188.41	336
jgi|Phlrad1|132288|plus.g3913.t1	S09_quant	20.4269	18.6648	183.125	336
jgi|Phlrad1|132288|plus.g3913.t1	S10_quant	21.7465	19.7923	184.495	336
jgi|Phlrad1|132288|plus.g3913.t1	S11_quant	34.3329	30.1684	193.142	336
jgi|Phlrad1|132288|plus.g3913.t1	S12_quant	23.4552	21.9299	177.417	336
jgi|Phlrad1|132289|minus.g3879.t1	S07_quant	305.195	18.013	2821.64	2985
jgi|Phlrad1|132289|minus.g3879.t1	S08_quant	365.257	21.7384	2830.32	2985
jgi|Phlrad1|132289|minus.g3879.t1	S09_quant	372.79	22.0874	2824.15	2985
jgi|Phlrad1|132289|minus.g3879.t1	S10_quant	449.758	26.698	2828.72	2985
jgi|Phlrad1|132289|minus.g3879.t1	S11_quant	438.698	26.2547	2835.81	2985
jgi|Phlrad1|132289|minus.g3879.t1	S12_quant	423.311	24.9106	2818.82	2985
jgi|Phlrad1|132290|minus.g3880.t1	S07_quant	51.6784	8.73172	985.642	1149
jgi|Phlrad1|132290|minus.g3880.t1	S08_quant	54.3593	9.20904	994.318	1149
jgi|Phlrad1|132290|minus.g3880.t1	S09_quant	63.3233	10.7228	988.153	1149
jgi|Phlrad1|132290|minus.g3880.t1	S10_quant	67.2165	11.3695	992.716	1149
jgi|Phlrad1|132290|minus.g3880.t1	S11_quant	55.314	9.38939	999.81	1149
jgi|Phlrad1|132290|minus.g3880.t1	S12_quant	72.5996	12.2532	982.822	1149
jgi|Phlrad1|132291|plus.g3916.t1	S07_quant	424.153	40.6979	1735.64	1899
jgi|Phlrad1|132291|plus.g3916.t1	S08_quant	465.392	44.9427	1744.32	1899
jgi|Phlrad1|132291|plus.g3916.t1	S09_quant	482.074	46.4082	1738.15	1899
jgi|Phlrad1|132291|plus.g3916.t1	S10_quant	529.824	51.0499	1742.72	1899
jgi|Phlrad1|132291|plus.g3916.t1	S11_quant	532.159	51.6143	1749.81	1899
jgi|Phlrad1|132291|plus.g3916.t1	S12_quant	419.961	40.2019	1732.82	1899
jgi|Phlrad1|132292|plus.g3917.t1	S07_quant	49.7283	11.1515	742.642	906
jgi|Phlrad1|132292|plus.g3917.t1	S08_quant	28.6102	6.41449	751.318	906
jgi|Phlrad1|132292|plus.g3917.t1	S09_quant	32.683	7.33914	745.153	906
jgi|Phlrad1|132292|plus.g3917.t1	S10_quant	41.5161	9.29843	749.716	906
jgi|Phlrad1|132292|plus.g3917.t1	S11_quant	47.6845	10.6933	756.81	906
jgi|Phlrad1|132292|plus.g3917.t1	S12_quant	46.9105	10.518	739.822	906
jgi|Phlrad1|132293|minus.g3883.t1	S07_quant	74.1049	9.59923	1285.64	1449
jgi|Phlrad1|132293|minus.g3883.t1	S08_quant	95.3673	12.4115	1294.32	1449
jgi|Phlrad1|132293|minus.g3883.t1	S09_quant	88.8569	11.5423	1288.15	1449
jgi|Phlrad1|132293|minus.g3883.t1	S10_quant	86.9861	11.2989	1292.72	1449
jgi|Phlrad1|132293|minus.g3883.t1	S11_quant	81.0637	10.5844	1299.81	1449
jgi|Phlrad1|132293|minus.g3883.t1	S12_quant	84.8857	10.9764	1282.82	1449
jgi|Phlrad1|132294|plus.g3919.t1	S07_quant	199.888	55.607	598.642	762
jgi|Phlrad1|132294|plus.g3919.t1	S08_quant	196.457	54.4899	607.318	762
jgi|Phlrad1|132294|plus.g3919.t1	S09_quant	210.397	58.5629	601.153	762
jgi|Phlrad1|132294|plus.g3919.t1	S10_quant	216.477	60.0112	605.716	762
jgi|Phlrad1|132294|plus.g3919.t1	S11_quant	176.433	48.8622	612.81	762
jgi|Phlrad1|132294|plus.g3919.t1	S12_quant	147.433	41.0459	595.822	762
jgi|Phlrad1|132295|minus.g3885.t1	S07_quant	292.52	23.0153	2116.64	2280
jgi|Phlrad1|132295|minus.g3885.t1	S08_quant	326.156	25.8504	2125.32	2280
jgi|Phlrad1|132295|minus.g3885.t1	S09_quant	405.473	32.0161	2119.15	2280
jgi|Phlrad1|132295|minus.g3885.t1	S10_quant	425.046	33.6069	2123.72	2280
jgi|Phlrad1|132295|minus.g3885.t1	S11_quant	426.3	33.9539	2130.81	2280
jgi|Phlrad1|132295|minus.g3885.t1	S12_quant	327.257	25.681	2113.82	2280
jgi|Phlrad1|132296|minus.g3886.t1	S07_quant	255.467	68.0015	625.642	789
jgi|Phlrad1|132296|minus.g3886.t1	S08_quant	292.777	77.7492	634.318	789
jgi|Phlrad1|132296|minus.g3886.t1	S09_quant	267.592	71.2814	628.153	789
jgi|Phlrad1|132296|minus.g3886.t1	S10_quant	327.186	86.8313	632.716	789
jgi|Phlrad1|132296|minus.g3886.t1	S11_quant	252.728	67.0381	639.81	789
jgi|Phlrad1|132296|minus.g3886.t1	S12_quant	282.58	75.2608	622.822	789
jgi|Phlrad1|132297|plus.g3922.t1	S07_quant	5322.88	815.024	1087.64	1251
jgi|Phlrad1|132297|plus.g3922.t1	S08_quant	5774.49	887.242	1096.32	1251
jgi|Phlrad1|132297|plus.g3922.t1	S09_quant	6216.92	954.238	1090.15	1251
jgi|Phlrad1|132297|plus.g3922.t1	S10_quant	8052.14	1235.09	1094.72	1251
jgi|Phlrad1|132297|plus.g3922.t1	S11_quant	6604.31	1017.28	1101.81	1251
jgi|Phlrad1|132297|plus.g3922.t1	S12_quant	5790.1	885.358	1084.82	1251
jgi|Phlrad1|132298|plus.g3923.t1	S07_quant	268.143	23.6068	1891.64	2055
jgi|Phlrad1|132298|plus.g3923.t1	S08_quant	286.102	25.3606	1900.32	2055
jgi|Phlrad1|132298|plus.g3923.t1	S09_quant	308.446	27.2479	1894.15	2055
jgi|Phlrad1|132298|plus.g3923.t1	S10_quant	319.278	28.2358	1898.72	2055
jgi|Phlrad1|132298|plus.g3923.t1	S11_quant	322.347	28.7054	1905.81	2055
jgi|Phlrad1|132298|plus.g3923.t1	S12_quant	309.386	27.1707	1888.82	2055
jgi|Phlrad1|132299|plus.g3924.t1	S07_quant	673.77	47.4321	2365.64	2529
jgi|Phlrad1|132299|plus.g3924.t1	S08_quant	743.865	52.774	2374.32	2529
jgi|Phlrad1|132299|plus.g3924.t1	S09_quant	783.371	55.3511	2368.15	2529
jgi|Phlrad1|132299|plus.g3924.t1	S10_quant	815.495	57.7119	2372.72	2529
jgi|Phlrad1|132299|plus.g3924.t1	S11_quant	855.46	61.0066	2379.81	2529
jgi|Phlrad1|132299|plus.g3924.t1	S12_quant	793.011	55.6724	2362.82	2529
jgi|Phlrad1|132300|plus.g3925.t1	S07_quant	223.29	103.569	359.046	522
jgi|Phlrad1|132300|plus.g3925.t1	S08_quant	267.028	122.402	367.479	522
jgi|Phlrad1|132300|plus.g3925.t1	S09_quant	277.805	128.548	361.612	522
jgi|Phlrad1|132300|plus.g3925.t1	S10_quant	286.659	131.493	366.059	522
jgi|Phlrad1|132300|plus.g3925.t1	S11_quant	295.644	134.444	373.203	522
jgi|Phlrad1|132300|plus.g3925.t1	S12_quant	309.386	144.07	356.221	522
jgi|Phlrad1|132301|minus.g3891.t1	S07_quant	79.9553	10.5792	1258.64	1422
jgi|Phlrad1|132301|minus.g3891.t1	S08_quant	75.3401	10.014	1267.32	1422
jgi|Phlrad1|132301|minus.g3891.t1	S09_quant	74.5581	9.89227	1261.15	1422
jgi|Phlrad1|132301|minus.g3891.t1	S10_quant	85.0091	11.2777	1265.72	1422
jgi|Phlrad1|132301|minus.g3891.t1	S11_quant	83.9248	11.1904	1272.81	1422
jgi|Phlrad1|132301|minus.g3891.t1	S12_quant	78.1842	10.3272	1255.82	1422
jgi|Phlrad1|132302|plus.g3927.t1	S07_quant	76.0551	10.1846	1243.64	1407
jgi|Phlrad1|132302|plus.g3927.t1	S08_quant	84.8769	11.4167	1252.32	1407
jgi|Phlrad1|132302|plus.g3927.t1	S09_quant	105.198	14.1256	1246.15	1407
jgi|Phlrad1|132302|plus.g3927.t1	S10_quant	109.721	14.7306	1250.72	1407
jgi|Phlrad1|132302|plus.g3927.t1	S11_quant	94.4153	12.7393	1257.81	1407
jgi|Phlrad1|132302|plus.g3927.t1	S12_quant	107.224	14.3342	1240.82	1407
jgi|Phlrad1|132303|minus.g3893.t1	S07_quant	544.086	62.5916	1447.64	1611
jgi|Phlrad1|132303|minus.g3893.t1	S08_quant	554.084	64.0892	1456.32	1611
jgi|Phlrad1|132303|minus.g3893.t1	S09_quant	550.504	63.5208	1450.15	1611
jgi|Phlrad1|132303|minus.g3893.t1	S10_quant	542.675	62.6399	1454.72	1611
jgi|Phlrad1|132303|minus.g3893.t1	S11_quant	577.936	67.0978	1461.81	1611
jgi|Phlrad1|132303|minus.g3893.t1	S12_quant	545.055	62.5774	1444.82	1611
jgi|Phlrad1|132304|minus.g3894.t1	S07_quant	61.4291	11.8591	862.642	1026
jgi|Phlrad1|132304|minus.g3894.t1	S08_quant	81.0622	15.6714	871.318	1026
jgi|Phlrad1|132304|minus.g3894.t1	S09_quant	74.5581	14.4202	865.153	1026
jgi|Phlrad1|132304|minus.g3894.t1	S10_quant	67.2165	12.9774	869.716	1026
jgi|Phlrad1|132304|minus.g3894.t1	S11_quant	58.1751	11.2603	876.81	1026
jgi|Phlrad1|132304|minus.g3894.t1	S12_quant	58.0797	11.2049	859.822	1026
jgi|Phlrad1|132305|plus.g3930.t1	S07_quant	46.8031	18.3511	424.739	588
jgi|Phlrad1|132305|plus.g3930.t1	S08_quant	43.8689	17.0518	433.362	588
jgi|Phlrad1|132305|plus.g3930.t1	S09_quant	43.9178	17.1962	427.344	588
jgi|Phlrad1|132305|plus.g3930.t1	S10_quant	34.5967	13.452	431.855	588
jgi|Phlrad1|132305|plus.g3930.t1	S11_quant	38.1476	14.7491	438.955	588
jgi|Phlrad1|132305|plus.g3930.t1	S12_quant	40.209	15.8069	421.958	588
jgi|Phlrad1|132306|minus.g3896.t1	S07_quant	189.163	67.9378	463.696	627
jgi|Phlrad1|132306|minus.g3896.t1	S08_quant	185.966	66.3231	472.318	627
jgi|Phlrad1|132306|minus.g3896.t1	S09_quant	215.503	77.3389	466.257	627
jgi|Phlrad1|132306|minus.g3896.t1	S10_quant	206.592	73.688	470.767	627
jgi|Phlrad1|132306|minus.g3896.t1	S11_quant	211.719	75.1927	477.864	627
jgi|Phlrad1|132306|minus.g3896.t1	S12_quant	222.266	79.9993	460.871	627
jgi|Phlrad1|132307|plus.g3932.t1	S07_quant	219.39	24.186	1510.64	1674
jgi|Phlrad1|132307|plus.g3932.t1	S08_quant	219.345	24.3189	1519.32	1674
jgi|Phlrad1|132307|plus.g3932.t1	S09_quant	212.439	23.4921	1513.15	1674
jgi|Phlrad1|132307|plus.g3932.t1	S10_quant	172.984	19.1384	1517.72	1674
jgi|Phlrad1|132307|plus.g3932.t1	S11_quant	202.182	22.5033	1524.81	1674
jgi|Phlrad1|132307|plus.g3932.t1	S12_quant	196.577	21.6259	1507.82	1674
jgi|Phlrad1|132308|minus.g3898.t1	S07_quant	264.243	77.7984	565.642	729
jgi|Phlrad1|132308|minus.g3898.t1	S08_quant	234.603	68.8093	574.318	729
jgi|Phlrad1|132308|minus.g3898.t1	S09_quant	214.482	63.1613	568.21	729
jgi|Phlrad1|132308|minus.g3898.t1	S10_quant	274.797	80.568	572.716	729
jgi|Phlrad1|132308|minus.g3898.t1	S11_quant	247.959	72.5796	579.81	729
jgi|Phlrad1|132308|minus.g3898.t1	S12_quant	232.319	68.4707	562.822	729
jgi|Phlrad1|132309|plus.g3934.t1	S07_quant	0	0	1852.64	2016
jgi|Phlrad1|132309|plus.g3934.t1	S08_quant	0	0	1861.32	2016
jgi|Phlrad1|132309|plus.g3934.t1	S09_quant	0	0	1855.15	2016
jgi|Phlrad1|132309|plus.g3934.t1	S10_quant	0.988478	0.0892504	1859.72	2016
jgi|Phlrad1|132309|plus.g3934.t1	S11_quant	0	0	1866.81	2016
jgi|Phlrad1|132309|plus.g3934.t1	S12_quant	0	0	1849.82	2016
jgi|Phlrad1|132310|plus.g3935.t1	S07_quant	0	0	1339.64	1503
jgi|Phlrad1|132310|plus.g3935.t1	S08_quant	0	0	1348.32	1503
jgi|Phlrad1|132310|plus.g3935.t1	S09_quant	0	0	1342.15	1503
jgi|Phlrad1|132310|plus.g3935.t1	S10_quant	0	0	1346.72	1503
jgi|Phlrad1|132310|plus.g3935.t1	S11_quant	0	0	1353.81	1503
jgi|Phlrad1|132310|plus.g3935.t1	S12_quant	0	0	1336.82	1503
jgi|Phlrad1|132311|minus.g3901.t1	S07_quant	0	0	655.642	819
jgi|Phlrad1|132311|minus.g3901.t1	S08_quant	0	0	664.318	819
jgi|Phlrad1|132311|minus.g3901.t1	S09_quant	0	0	658.153	819
jgi|Phlrad1|132311|minus.g3901.t1	S10_quant	0	0	662.716	819
jgi|Phlrad1|132311|minus.g3901.t1	S11_quant	0	0	669.81	819
jgi|Phlrad1|132311|minus.g3901.t1	S12_quant	0	0	652.822	819
jgi|Phlrad1|132312|plus.g3937.t1	S07_quant	0	0	1135.64	1299
jgi|Phlrad1|132312|plus.g3937.t1	S08_quant	0	0	1144.32	1299
jgi|Phlrad1|132312|plus.g3937.t1	S09_quant	0	0	1138.15	1299
jgi|Phlrad1|132312|plus.g3937.t1	S10_quant	0	0	1142.72	1299
jgi|Phlrad1|132312|plus.g3937.t1	S11_quant	0	0	1149.81	1299
jgi|Phlrad1|132312|plus.g3937.t1	S12_quant	0	0	1132.82	1299
jgi|Phlrad1|132313|minus.g3903.t1	S07_quant	0	0	252.963	414
jgi|Phlrad1|132313|minus.g3903.t1	S08_quant	0	0	261.487	414
jgi|Phlrad1|132313|minus.g3903.t1	S09_quant	0	0	255.676	414
jgi|Phlrad1|132313|minus.g3903.t1	S10_quant	0	0	259.275	414
jgi|Phlrad1|132313|minus.g3903.t1	S11_quant	0	0	267.048	414
jgi|Phlrad1|132313|minus.g3903.t1	S12_quant	0	0	250.432	414
jgi|Phlrad1|132314|minus.g3904.t1	S07_quant	0	0	224.169	384
jgi|Phlrad1|132314|minus.g3904.t1	S08_quant	0	0	232.704	384
jgi|Phlrad1|132314|minus.g3904.t1	S09_quant	0	0	227.24	384
jgi|Phlrad1|132314|minus.g3904.t1	S10_quant	0	0	230.4	384
jgi|Phlrad1|132314|minus.g3904.t1	S11_quant	0	0	238.01	384
jgi|Phlrad1|132314|minus.g3904.t1	S12_quant	0	0	221.454	384
jgi|Phlrad1|132315|plus.g3940.t1	S07_quant	0	0	412.781	576
jgi|Phlrad1|132315|plus.g3940.t1	S08_quant	0	0	421.362	576
jgi|Phlrad1|132315|plus.g3940.t1	S09_quant	1.02177	0.411638	415.344	576
jgi|Phlrad1|132315|plus.g3940.t1	S10_quant	0	0	419.941	576
jgi|Phlrad1|132315|plus.g3940.t1	S11_quant	0	0	426.998	576
jgi|Phlrad1|132315|plus.g3940.t1	S12_quant	0	0	409.958	576
jgi|Phlrad1|132316|plus.g3941.t1	S07_quant	0	0	1558.64	1722
jgi|Phlrad1|132316|plus.g3941.t1	S08_quant	0	0	1567.32	1722
jgi|Phlrad1|132316|plus.g3941.t1	S09_quant	0	0	1561.15	1722
jgi|Phlrad1|132316|plus.g3941.t1	S10_quant	0	0	1565.72	1722
jgi|Phlrad1|132316|plus.g3941.t1	S11_quant	0	0	1572.81	1722
jgi|Phlrad1|132316|plus.g3941.t1	S12_quant	0	0	1555.82	1722
jgi|Phlrad1|132317|plus.g3942.t1	S07_quant	0	0	3160.64	3324
jgi|Phlrad1|132317|plus.g3942.t1	S08_quant	0	0	3169.32	3324
jgi|Phlrad1|132317|plus.g3942.t1	S09_quant	0	0	3163.15	3324
jgi|Phlrad1|132317|plus.g3942.t1	S10_quant	0	0	3167.72	3324
jgi|Phlrad1|132317|plus.g3942.t1	S11_quant	0	0	3174.81	3324
jgi|Phlrad1|132317|plus.g3942.t1	S12_quant	0	0	3157.82	3324
jgi|Phlrad1|132318|plus.g3943.t1	S07_quant	0	0	1510.64	1674
jgi|Phlrad1|132318|plus.g3943.t1	S08_quant	0	0	1519.32	1674
jgi|Phlrad1|132318|plus.g3943.t1	S09_quant	0	0	1513.15	1674
jgi|Phlrad1|132318|plus.g3943.t1	S10_quant	0	0	1517.72	1674
jgi|Phlrad1|132318|plus.g3943.t1	S11_quant	0	0	1524.81	1674
jgi|Phlrad1|132318|plus.g3943.t1	S12_quant	0	0	1507.82	1674
jgi|Phlrad1|132319|plus.g3944.t1	S07_quant	0	0	2878.64	3042
jgi|Phlrad1|132319|plus.g3944.t1	S08_quant	0	0	2887.32	3042
jgi|Phlrad1|132319|plus.g3944.t1	S09_quant	0	0	2881.15	3042
jgi|Phlrad1|132319|plus.g3944.t1	S10_quant	0	0	2885.72	3042
jgi|Phlrad1|132319|plus.g3944.t1	S11_quant	0	0	2892.81	3042
jgi|Phlrad1|132319|plus.g3944.t1	S12_quant	0	0	2875.82	3042
jgi|Phlrad1|132320|plus.g3945.t1	S07_quant	0	0	1264.64	1428
jgi|Phlrad1|132320|plus.g3945.t1	S08_quant	0	0	1273.32	1428
jgi|Phlrad1|132320|plus.g3945.t1	S09_quant	0	0	1267.15	1428
jgi|Phlrad1|132320|plus.g3945.t1	S10_quant	0	0	1271.72	1428
jgi|Phlrad1|132320|plus.g3945.t1	S11_quant	0	0	1278.81	1428
jgi|Phlrad1|132320|plus.g3945.t1	S12_quant	0	0	1261.82	1428
jgi|Phlrad1|132321|plus.g3946.t1	S07_quant	664.994	39.7988	2782.64	2946
jgi|Phlrad1|132321|plus.g3946.t1	S08_quant	558.852	33.7251	2791.32	2946
jgi|Phlrad1|132321|plus.g3946.t1	S09_quant	585.23	35.1598	2785.15	2946
jgi|Phlrad1|132321|plus.g3946.t1	S10_quant	592.098	35.6389	2789.72	2946
jgi|Phlrad1|132321|plus.g3946.t1	S11_quant	538.835	32.6973	2796.81	2946
jgi|Phlrad1|132321|plus.g3946.t1	S12_quant	626.59	37.3902	2779.82	2946
jgi|Phlrad1|132322|minus.g3912.t1	S07_quant	272.043	24.7347	1831.64	1995
jgi|Phlrad1|132322|minus.g3912.t1	S08_quant	310.897	28.457	1840.32	1995
jgi|Phlrad1|132322|minus.g3912.t1	S09_quant	324.787	29.63	1834.15	1995
jgi|Phlrad1|132322|minus.g3912.t1	S10_quant	236.246	21.5745	1838.72	1995
jgi|Phlrad1|132322|minus.g3912.t1	S11_quant	273.709	25.1664	1845.81	1995
jgi|Phlrad1|132322|minus.g3912.t1	S12_quant	243.488	22.085	1828.82	1995
jgi|Phlrad1|132323|minus.g3913.t1	S07_quant	431.954	103.113	697.642	861
jgi|Phlrad1|132323|minus.g3913.t1	S08_quant	457.763	109.171	706.318	861
jgi|Phlrad1|132323|minus.g3913.t1	S09_quant	452.455	108.131	700.153	861
jgi|Phlrad1|132323|minus.g3913.t1	S10_quant	457.665	109.05	704.716	861
jgi|Phlrad1|132323|minus.g3913.t1	S11_quant	454.91	108.463	711.81	861
jgi|Phlrad1|132323|minus.g3913.t1	S12_quant	452.351	107.993	694.822	861
jgi|Phlrad1|132324|plus.g3949.t1	S07_quant	263.268	23.2513	1885.64	2049
jgi|Phlrad1|132324|plus.g3949.t1	S08_quant	246.048	21.8792	1894.32	2049
jgi|Phlrad1|132324|plus.g3949.t1	S09_quant	253.293	22.4468	1888.15	2049
jgi|Phlrad1|132324|plus.g3949.t1	S10_quant	238.223	21.1343	1892.72	2049
jgi|Phlrad1|132324|plus.g3949.t1	S11_quant	257.496	23.0028	1899.81	2049
jgi|Phlrad1|132324|plus.g3949.t1	S12_quant	240.137	21.1564	1882.82	2049
jgi|Phlrad1|132325|plus.g3950.t1	S07_quant	196.963	85.6747	382.862	546
jgi|Phlrad1|132325|plus.g3950.t1	S08_quant	170.707	73.4599	391.442	546
jgi|Phlrad1|132325|plus.g3950.t1	S09_quant	155.244	67.391	385.463	546
jgi|Phlrad1|132325|plus.g3950.t1	S10_quant	186.822	80.4403	389.983	546
jgi|Phlrad1|132325|plus.g3950.t1	S11_quant	174.525	74.5774	397.165	546
jgi|Phlrad1|132325|plus.g3950.t1	S12_quant	215.565	94.0905	380.035	546
jgi|Phlrad1|132326|minus.g3916.t1	S07_quant	1569.85	374.745	697.642	861
jgi|Phlrad1|132326|minus.g3916.t1	S08_quant	2056.12	490.358	706.318	861
jgi|Phlrad1|132326|minus.g3916.t1	S09_quant	2393.01	571.9	700.153	861
jgi|Phlrad1|132326|minus.g3916.t1	S10_quant	2505.79	597.064	704.716	861
jgi|Phlrad1|132326|minus.g3916.t1	S11_quant	2073.32	494.336	711.81	861
jgi|Phlrad1|132326|minus.g3916.t1	S12_quant	1527.94	364.775	694.822	861
jgi|Phlrad1|132327|minus.g3917.t1	S07_quant	873.658	62.3739	2332.64	2496
jgi|Phlrad1|132327|minus.g3917.t1	S08_quant	856.398	61.6142	2341.32	2496
jgi|Phlrad1|132327|minus.g3917.t1	S09_quant	886.526	63.5251	2335.15	2496
jgi|Phlrad1|132327|minus.g3917.t1	S10_quant	946.962	67.9609	2339.72	2496
jgi|Phlrad1|132327|minus.g3917.t1	S11_quant	961.32	69.5199	2346.81	2496
jgi|Phlrad1|132327|minus.g3917.t1	S12_quant	814.232	57.9718	2329.82	2496
jgi|Phlrad1|132328|plus.g3954.t1	S07_quant	539.211	36.8382	2437.64	2601
jgi|Phlrad1|132328|plus.g3954.t1	S08_quant	607.489	41.8303	2446.32	2601
jgi|Phlrad1|132328|plus.g3954.t1	S09_quant	614.849	42.1619	2440.15	2601
jgi|Phlrad1|132328|plus.g3954.t1	S10_quant	558.49	38.3599	2444.72	2601
jgi|Phlrad1|132328|plus.g3954.t1	S11_quant	672.352	46.5403	2451.81	2601
jgi|Phlrad1|132328|plus.g3954.t1	S12_quant	461.287	31.4264	2434.82	2601
jgi|Phlrad1|132329|minus.g3919.t1	S07_quant	61.4291	10.9105	937.642	1101
jgi|Phlrad1|132329|minus.g3919.t1	S08_quant	72.4791	12.9015	946.318	1101
jgi|Phlrad1|132329|minus.g3919.t1	S09_quant	74.5581	13.2698	940.153	1101
jgi|Phlrad1|132329|minus.g3919.t1	S10_quant	56.3433	10.0145	944.716	1101
jgi|Phlrad1|132329|minus.g3919.t1	S11_quant	63.8973	11.3933	951.81	1101
jgi|Phlrad1|132329|minus.g3919.t1	S12_quant	69.2488	12.2878	934.822	1101
jgi|Phlrad1|132330|plus.g3956.t1	S07_quant	510.934	133.444	637.642	801
jgi|Phlrad1|132330|plus.g3956.t1	S08_quant	545.501	142.172	646.318	801
jgi|Phlrad1|132330|plus.g3956.t1	S09_quant	510.672	133.483	640.153	801
jgi|Phlrad1|132330|plus.g3956.t1	S10_quant	469.527	122.288	644.716	801
jgi|Phlrad1|132330|plus.g3956.t1	S11_quant	465.401	121.179	651.81	801
jgi|Phlrad1|132330|plus.g3956.t1	S12_quant	503.729	131.625	634.822	801
jgi|Phlrad1|132331|minus.g3921.t1	S07_quant	202.814	33.8557	997.642	1161
jgi|Phlrad1|132331|minus.g3921.t1	S08_quant	212.669	35.5987	1006.32	1161
jgi|Phlrad1|132331|minus.g3921.t1	S09_quant	169.543	28.365	1000.15	1161
jgi|Phlrad1|132331|minus.g3921.t1	S10_quant	142.341	23.789	1004.72	1161
jgi|Phlrad1|132331|minus.g3921.t1	S11_quant	159.266	26.7143	1011.81	1161
jgi|Phlrad1|132331|minus.g3921.t1	S12_quant	139.615	23.2797	994.822	1161
jgi|Phlrad1|132332|plus.g3958.t1	S07_quant	302.27	67.2404	748.642	912
jgi|Phlrad1|132332|plus.g3958.t1	S08_quant	307.083	68.3034	757.318	912
jgi|Phlrad1|132332|plus.g3958.t1	S09_quant	291.083	64.8421	751.153	912
jgi|Phlrad1|132332|plus.g3958.t1	S10_quant	284.682	63.2544	755.716	912
jgi|Phlrad1|132332|plus.g3958.t1	S11_quant	332.838	74.0518	762.81	912
jgi|Phlrad1|132332|plus.g3958.t1	S12_quant	292.632	65.0846	745.822	912
jgi|Phlrad1|132333|minus.g3923.t1	S07_quant	98.4816	32.2408	508.696	672
jgi|Phlrad1|132333|minus.g3923.t1	S08_quant	123.977	40.3692	517.318	672
jgi|Phlrad1|132333|minus.g3923.t1	S09_quant	106.22	34.7676	511.21	672
jgi|Phlrad1|132333|minus.g3923.t1	S10_quant	137.398	44.7364	515.716	672
jgi|Phlrad1|132333|minus.g3923.t1	S11_quant	151.637	49.2193	522.864	672
jgi|Phlrad1|132333|minus.g3923.t1	S12_quant	154.134	50.5468	505.822	672
jgi|Phlrad1|132334|plus.g3960.t1	S07_quant	285.694	85.0159	559.642	723
jgi|Phlrad1|132334|plus.g3960.t1	S08_quant	338.554	100.346	568.318	723
jgi|Phlrad1|132334|plus.g3960.t1	S09_quant	392.196	116.728	562.21	723
jgi|Phlrad1|132334|plus.g3960.t1	S10_quant	399.345	118.324	566.716	723
jgi|Phlrad1|132334|plus.g3960.t1	S11_quant	411.994	121.855	573.81	723
jgi|Phlrad1|132334|plus.g3960.t1	S12_quant	351.829	104.811	556.822	723
jgi|Phlrad1|132335|minus.g3925.t1	S07_quant	278.869	21.6649	2143.64	2307
jgi|Phlrad1|132335|minus.g3925.t1	S08_quant	290.87	22.7645	2152.32	2307
jgi|Phlrad1|132335|minus.g3925.t1	S09_quant	274.741	21.4206	2146.15	2307
jgi|Phlrad1|132335|minus.g3925.t1	S10_quant	257.993	20.1425	2150.72	2307
jgi|Phlrad1|132335|minus.g3925.t1	S11_quant	267.033	21.0025	2157.81	2307
jgi|Phlrad1|132335|minus.g3925.t1	S12_quant	265.826	20.5972	2140.82	2307
jgi|Phlrad1|132336|plus.g3962.t1	S07_quant	1781.44	287.855	1030.64	1194
jgi|Phlrad1|132336|plus.g3962.t1	S08_quant	1458.17	236.333	1039.32	1194
jgi|Phlrad1|132336|plus.g3962.t1	S09_quant	1410.48	228.439	1033.15	1194
jgi|Phlrad1|132336|plus.g3962.t1	S10_quant	1587.5	256.876	1037.72	1194
jgi|Phlrad1|132336|plus.g3962.t1	S11_quant	1390.48	225.864	1044.81	1194
jgi|Phlrad1|132336|plus.g3962.t1	S12_quant	1350.35	217.932	1027.82	1194
jgi|Phlrad1|132337|minus.g3927.t1	S07_quant	118.958	74.8497	264.675	426
jgi|Phlrad1|132337|minus.g3927.t1	S08_quant	125.885	77.689	272.948	426
jgi|Phlrad1|132337|minus.g3927.t1	S09_quant	151.159	94.6396	267.257	426
jgi|Phlrad1|132337|minus.g3927.t1	S10_quant	215.488	133.579	270.878	426
jgi|Phlrad1|132337|minus.g3927.t1	S11_quant	173.572	105.762	278.527	426
jgi|Phlrad1|132337|minus.g3927.t1	S12_quant	131.796	83.4302	262.042	426
jgi|Phlrad1|132338|plus.g3964.t1	S07_quant	559.687	39.0052	2389.64	2553
jgi|Phlrad1|132338|plus.g3964.t1	S08_quant	511.169	35.9023	2398.32	2553
jgi|Phlrad1|132338|plus.g3964.t1	S09_quant	514.757	36.0066	2392.15	2553
jgi|Phlrad1|132338|plus.g3964.t1	S10_quant	734.439	51.4552	2396.72	2553
jgi|Phlrad1|132338|plus.g3964.t1	S11_quant	715.268	50.4996	2403.81	2553
jgi|Phlrad1|132338|plus.g3964.t1	S12_quant	610.953	42.46	2386.82	2553
jgi|Phlrad1|132339|plus.g3965.t1	S07_quant	1285.14	45.511	4702.64	4866
jgi|Phlrad1|132339|plus.g3965.t1	S08_quant	1154.9	41.292	4711.32	4866
jgi|Phlrad1|132339|plus.g3965.t1	S09_quant	1283.83	45.6565	4705.15	4866
jgi|Phlrad1|132339|plus.g3965.t1	S10_quant	1109.07	39.5417	4709.72	4866
jgi|Phlrad1|132339|plus.g3965.t1	S11_quant	1203.56	43.305	4716.81	4866
jgi|Phlrad1|132339|plus.g3965.t1	S12_quant	1264.35	44.6249	4699.82	4866
jgi|Phlrad1|132340|minus.g3930.t1	S07_quant	390.026	38.7634	1675.64	1839
jgi|Phlrad1|132340|minus.g3930.t1	S08_quant	335.693	33.5725	1684.32	1839
jgi|Phlrad1|132340|minus.g3930.t1	S09_quant	356.449	35.5414	1678.15	1839
jgi|Phlrad1|132340|minus.g3930.t1	S10_quant	385.507	38.469	1682.72	1839
jgi|Phlrad1|132340|minus.g3930.t1	S11_quant	416.763	41.8572	1689.81	1839
jgi|Phlrad1|132340|minus.g3930.t1	S12_quant	369.699	36.6598	1672.82	1839
jgi|Phlrad1|132341|minus.g3931.t1	S07_quant	354.924	35.338	1672.64	1836
jgi|Phlrad1|132341|minus.g3931.t1	S08_quant	314.712	31.5303	1681.32	1836
jgi|Phlrad1|132341|minus.g3931.t1	S09_quant	306.403	30.6061	1675.15	1836
jgi|Phlrad1|132341|minus.g3931.t1	S10_quant	304.451	30.4349	1679.72	1836
jgi|Phlrad1|132341|minus.g3931.t1	S11_quant	291.829	29.3618	1686.81	1836
jgi|Phlrad1|132341|minus.g3931.t1	S12_quant	333.958	33.1752	1669.82	1836
jgi|Phlrad1|132342|plus.g3968.t1	S07_quant	300.32	45.8576	1090.64	1254
jgi|Phlrad1|132342|plus.g3968.t1	S08_quant	338.554	51.8764	1099.32	1254
jgi|Phlrad1|132342|plus.g3968.t1	S09_quant	305.382	46.7445	1093.15	1254
jgi|Phlrad1|132342|plus.g3968.t1	S10_quant	362.772	55.4923	1097.72	1254
jgi|Phlrad1|132342|plus.g3968.t1	S11_quant	307.088	47.1732	1104.81	1254
jgi|Phlrad1|132342|plus.g3968.t1	S12_quant	318.321	48.5399	1087.82	1254
jgi|Phlrad1|132343|plus.g3969.t1	S07_quant	1033.57	166.525	1033.64	1197
jgi|Phlrad1|132343|plus.g3969.t1	S08_quant	971.792	157.05	1042.32	1197
jgi|Phlrad1|132343|plus.g3969.t1	S09_quant	795.627	128.486	1036.15	1197
jgi|Phlrad1|132343|plus.g3969.t1	S10_quant	831.31	134.128	1040.72	1197
jgi|Phlrad1|132343|plus.g3969.t1	S11_quant	990.884	160.494	1047.81	1197
jgi|Phlrad1|132343|plus.g3969.t1	S12_quant	898.001	144.506	1030.82	1197
jgi|Phlrad1|132344|minus.g3934.t1	S07_quant	174.537	50.0596	580.642	744
jgi|Phlrad1|132344|minus.g3934.t1	S08_quant	144.005	41.1616	589.318	744
jgi|Phlrad1|132344|minus.g3934.t1	S09_quant	159.33	45.7175	583.153	744
jgi|Phlrad1|132344|minus.g3934.t1	S10_quant	105.767	30.2185	587.716	744
jgi|Phlrad1|132344|minus.g3934.t1	S11_quant	133.517	38.0958	594.81	744
jgi|Phlrad1|132344|minus.g3934.t1	S12_quant	106.107	30.4608	577.822	744
jgi|Phlrad1|132345|plus.g3971.t1	S07_quant	963.364	38.4862	4168.64	4332
[truncated: 85,775 more rows]

## Sheet: 48hr-tpm
target_id	sample	est_counts	tpm	eff_len	len
jgi|Phlrad1|132012|plus.g3673.t1	S13_quant	0	0	572.919	729
jgi|Phlrad1|132012|plus.g3673.t1	S14_quant	0	0	584.035	729
jgi|Phlrad1|132012|plus.g3673.t1	S15_quant	0	0	556.85	729
jgi|Phlrad1|132012|plus.g3673.t1	S16_quant	0	0	556.869	729
jgi|Phlrad1|132012|plus.g3673.t1	S17_quant	0	0	582.572	729
jgi|Phlrad1|132012|plus.g3673.t1	S18_quant	0	0	558.981	729
jgi|Phlrad1|132013|plus.g3674.t1	S13_quant	0	0	4118.86	4275
jgi|Phlrad1|132013|plus.g3674.t1	S14_quant	0	0	4130.04	4275
jgi|Phlrad1|132013|plus.g3674.t1	S15_quant	0	0	4102.79	4275
jgi|Phlrad1|132013|plus.g3674.t1	S16_quant	0	0	4102.87	4275
jgi|Phlrad1|132013|plus.g3674.t1	S17_quant	0	0	4128.57	4275
jgi|Phlrad1|132013|plus.g3674.t1	S18_quant	0	0	4104.98	4275
jgi|Phlrad1|132014|minus.g3636.t1	S13_quant	0	0	590.919	747
jgi|Phlrad1|132014|minus.g3636.t1	S14_quant	0	0	602.035	747
jgi|Phlrad1|132014|minus.g3636.t1	S15_quant	0	0	574.795	747
jgi|Phlrad1|132014|minus.g3636.t1	S16_quant	0	0	574.869	747
jgi|Phlrad1|132014|minus.g3636.t1	S17_quant	0	0	600.572	747
jgi|Phlrad1|132014|minus.g3636.t1	S18_quant	0	0	576.981	747
jgi|Phlrad1|132015|plus.g3676.t1	S13_quant	1.01443	0.828976	214.134	366
jgi|Phlrad1|132015|plus.g3676.t1	S14_quant	0	0	225.238	366
jgi|Phlrad1|132015|plus.g3676.t1	S15_quant	0	0	199.189	366
jgi|Phlrad1|132015|plus.g3676.t1	S16_quant	0	0	198.384	366
jgi|Phlrad1|132015|plus.g3676.t1	S17_quant	0.572931	0.454599	223.381	366
jgi|Phlrad1|132015|plus.g3676.t1	S18_quant	0	0	200.943	366
jgi|Phlrad1|132016|minus.g3638.t1	S13_quant	0	0	342.447	498
jgi|Phlrad1|132016|minus.g3638.t1	S14_quant	0	0	353.522	498
jgi|Phlrad1|132016|minus.g3638.t1	S15_quant	0	0	326.797	498
jgi|Phlrad1|132016|minus.g3638.t1	S16_quant	0	0	326.554	498
jgi|Phlrad1|132016|minus.g3638.t1	S17_quant	2.1691	1.09264	351.865	498
jgi|Phlrad1|132016|minus.g3638.t1	S18_quant	0	0	328.69	498
jgi|Phlrad1|132017|minus.g3639.t1	S13_quant	40.5774	10.6637	665.856	822
jgi|Phlrad1|132017|minus.g3639.t1	S14_quant	49.8398	13.0599	677.035	822
jgi|Phlrad1|132017|minus.g3639.t1	S15_quant	50.3283	13.2882	649.795	822
jgi|Phlrad1|132017|minus.g3639.t1	S16_quant	76.1822	20.0957	649.869	822
jgi|Phlrad1|132017|minus.g3639.t1	S17_quant	31.9966	8.39468	675.572	822
jgi|Phlrad1|132017|minus.g3639.t1	S18_quant	52.429	13.8301	651.981	822
jgi|Phlrad1|132018|minus.g3640.t1	S13_quant	300.273	102.43	512.973	669
jgi|Phlrad1|132018|minus.g3640.t1	S14_quant	289.977	98.1696	524.035	669
jgi|Phlrad1|132018|minus.g3640.t1	S15_quant	275.199	95.0284	496.85	669
jgi|Phlrad1|132018|minus.g3640.t1	S16_quant	1316.72	454.283	496.868	669
jgi|Phlrad1|132018|minus.g3640.t1	S17_quant	1146.23	388.774	522.572	669
jgi|Phlrad1|132018|minus.g3640.t1	S18_quant	1168.12	402.488	499.141	669
jgi|Phlrad1|132019|minus.g3641.t1	S13_quant	302.301	63.4386	833.856	990
jgi|Phlrad1|132019|minus.g3641.t1	S14_quant	284.54	59.7369	845.035	990
jgi|Phlrad1|132019|minus.g3641.t1	S15_quant	293.403	61.5534	817.795	990
jgi|Phlrad1|132019|minus.g3641.t1	S16_quant	265.608	55.6716	817.869	990
jgi|Phlrad1|132019|minus.g3641.t1	S17_quant	273.854	57.5397	843.572	990
jgi|Phlrad1|132019|minus.g3641.t1	S18_quant	272.631	57.1822	819.981	990
jgi|Phlrad1|132020|plus.g3680.t1	S13_quant	129.848	13.3119	1706.86	1863
jgi|Phlrad1|132020|plus.g3680.t1	S14_quant	117.803	12.1646	1718.04	1863
jgi|Phlrad1|132020|plus.g3680.t1	S15_quant	137.064	13.908	1690.79	1863
jgi|Phlrad1|132020|plus.g3680.t1	S16_quant	129.716	13.151	1690.87	1863
jgi|Phlrad1|132020|plus.g3680.t1	S17_quant	141.162	14.5756	1716.57	1863
jgi|Phlrad1|132020|plus.g3680.t1	S18_quant	141.558	14.3805	1692.98	1863
jgi|Phlrad1|132021|minus.g3643.t1	S13_quant	310.417	31.0064	1751.86	1908
jgi|Phlrad1|132021|minus.g3643.t1	S14_quant	290.883	29.2706	1763.04	1908
jgi|Phlrad1|132021|minus.g3643.t1	S15_quant	341.59	33.7628	1735.79	1908
jgi|Phlrad1|132021|minus.g3643.t1	S16_quant	330.466	32.6352	1735.87	1908
jgi|Phlrad1|132021|minus.g3643.t1	S17_quant	323.731	32.5728	1761.57	1908
jgi|Phlrad1|132021|minus.g3643.t1	S18_quant	333.448	32.9969	1737.98	1908
jgi|Phlrad1|132022|plus.g3682.t1	S13_quant	319.547	37.5818	1487.86	1644
jgi|Phlrad1|132022|plus.g3682.t1	S14_quant	281.821	33.3531	1499.04	1644
jgi|Phlrad1|132022|plus.g3682.t1	S15_quant	304.111	35.4501	1471.79	1644
jgi|Phlrad1|132022|plus.g3682.t1	S16_quant	281.051	32.7334	1471.87	1644
jgi|Phlrad1|132022|plus.g3682.t1	S17_quant	327.495	38.7604	1497.57	1644
jgi|Phlrad1|132022|plus.g3682.t1	S18_quant	331.351	38.6622	1473.98	1644
jgi|Phlrad1|132023|minus.g3645.t1	S13_quant	71.0104	10.1035	1229.86	1386
jgi|Phlrad1|132023|minus.g3645.t1	S14_quant	71.588	10.2337	1241.04	1386
jgi|Phlrad1|132023|minus.g3645.t1	S15_quant	62.1072	8.77867	1213.79	1386
jgi|Phlrad1|132023|minus.g3645.t1	S16_quant	67.9463	9.59555	1213.87	1386
jgi|Phlrad1|132023|minus.g3645.t1	S17_quant	62.1111	8.88114	1239.57	1386
jgi|Phlrad1|132023|minus.g3645.t1	S18_quant	88.0807	12.4579	1215.98	1386
jgi|Phlrad1|132024|minus.g3646.t1	S13_quant	19.2743	18.9339	178.132	327
jgi|Phlrad1|132024|minus.g3646.t1	S14_quant	28.0915	26.4382	188.502	327
jgi|Phlrad1|132024|minus.g3646.t1	S15_quant	21.4163	22.4653	163.555	327
jgi|Phlrad1|132024|minus.g3646.t1	S16_quant	26.7667	28.285	162.224	327
jgi|Phlrad1|132024|minus.g3646.t1	S17_quant	16.9394	16.0351	187.239	327
jgi|Phlrad1|132024|minus.g3646.t1	S18_quant	14.6801	15.288	165.146	327
jgi|Phlrad1|132025|minus.g3647.t1	S13_quant	134.92	23.9236	986.856	1143
jgi|Phlrad1|132025|minus.g3647.t1	S14_quant	109.648	19.4907	998.035	1143
jgi|Phlrad1|132025|minus.g3647.t1	S15_quant	100.657	17.7888	970.795	1143
jgi|Phlrad1|132025|minus.g3647.t1	S16_quant	137.952	24.358	970.869	1143
jgi|Phlrad1|132025|minus.g3647.t1	S17_quant	108.224	19.248	996.572	1143
jgi|Phlrad1|132025|minus.g3647.t1	S18_quant	116.392	20.5736	972.981	1143
jgi|Phlrad1|132026|minus.g3648.t1	S13_quant	150.136	18.9571	1385.86	1542
jgi|Phlrad1|132026|minus.g3648.t1	S14_quant	152.238	19.3326	1397.04	1542
jgi|Phlrad1|132026|minus.g3648.t1	S15_quant	137.064	17.1672	1369.79	1542
jgi|Phlrad1|132026|minus.g3648.t1	S16_quant	154.423	19.3246	1369.87	1542
jgi|Phlrad1|132026|minus.g3648.t1	S17_quant	147.749	18.7648	1395.57	1542
jgi|Phlrad1|132026|minus.g3648.t1	S18_quant	154.141	19.3224	1371.98	1542
jgi|Phlrad1|132027|plus.g3686.t1	S13_quant	162.309	30.0596	944.856	1101
jgi|Phlrad1|132027|plus.g3686.t1	S14_quant	156.769	29.0911	956.035	1101
jgi|Phlrad1|132027|plus.g3686.t1	S15_quant	138.135	25.5162	928.795	1101
jgi|Phlrad1|132027|plus.g3686.t1	S16_quant	131.775	24.3194	928.869	1101
jgi|Phlrad1|132027|plus.g3686.t1	S17_quant	120.458	22.3665	954.572	1101
jgi|Phlrad1|132027|plus.g3686.t1	S18_quant	140.51	25.957	930.981	1101
jgi|Phlrad1|132028|plus.g3687.t1	S13_quant	3.0433	5.06438	105.153	240
jgi|Phlrad1|132028|plus.g3687.t1	S14_quant	2.71853	4.20166	114.786	240
jgi|Phlrad1|132028|plus.g3687.t1	S15_quant	4.28326	7.73301	95.0293	240
jgi|Phlrad1|132028|plus.g3687.t1	S16_quant	1.02949	1.96186	89.956	240
jgi|Phlrad1|132028|plus.g3687.t1	S17_quant	0.941077	1.47688	112.941	240
jgi|Phlrad1|132028|plus.g3687.t1	S18_quant	1.04858	1.91374	94.2341	240
jgi|Phlrad1|132029|minus.g3650.t1	S13_quant	339.835	24.0575	2471.86	2628
jgi|Phlrad1|132029|minus.g3650.t1	S14_quant	352.503	25.1857	2483.04	2628
jgi|Phlrad1|132029|minus.g3650.t1	S15_quant	346.944	24.2381	2455.79	2628
jgi|Phlrad1|132029|minus.g3650.t1	S16_quant	337.672	23.5704	2455.87	2628
jgi|Phlrad1|132029|minus.g3650.t1	S17_quant	278.559	19.8958	2481.57	2628
jgi|Phlrad1|132029|minus.g3650.t1	S18_quant	313.525	21.9373	2457.98	2628
jgi|Phlrad1|132030|minus.g3651.t1	S13_quant	130.862	18.3067	1250.86	1407
jgi|Phlrad1|132030|minus.g3651.t1	S14_quant	141.364	19.872	1262.04	1407
jgi|Phlrad1|132030|minus.g3651.t1	S15_quant	109.223	15.1758	1234.79	1407
jgi|Phlrad1|132030|minus.g3651.t1	S16_quant	114.273	15.8635	1234.87	1407
jgi|Phlrad1|132030|minus.g3651.t1	S17_quant	99.7542	14.026	1260.57	1407
jgi|Phlrad1|132030|minus.g3651.t1	S18_quant	83.8864	11.6632	1236.98	1407
jgi|Phlrad1|132031|minus.g3652.t1	S13_quant	109.559	14.4596	1325.86	1482
jgi|Phlrad1|132031|minus.g3652.t1	S14_quant	127.771	16.9537	1337.04	1482
jgi|Phlrad1|132031|minus.g3652.t1	S15_quant	129.569	16.9718	1309.79	1482
jgi|Phlrad1|132031|minus.g3652.t1	S16_quant	116.332	15.2247	1309.87	1482
jgi|Phlrad1|132031|minus.g3652.t1	S17_quant	127.045	16.8602	1335.57	1482
jgi|Phlrad1|132031|minus.g3652.t1	S18_quant	125.83	16.4947	1311.98	1482
jgi|Phlrad1|132032|plus.g3690.t1	S13_quant	225.204	68.0712	578.919	735
jgi|Phlrad1|132032|plus.g3690.t1	S14_quant	235.606	70.8407	590.035	735
jgi|Phlrad1|132032|plus.g3690.t1	S15_quant	245.216	74.7535	562.795	735
jgi|Phlrad1|132032|plus.g3690.t1	S16_quant	210.016	63.9618	562.869	735
jgi|Phlrad1|132032|plus.g3690.t1	S17_quant	228.682	68.8658	588.572	735
jgi|Phlrad1|132032|plus.g3690.t1	S18_quant	213.91	65.116	564.981	735
jgi|Phlrad1|132033|plus.g3691.t2	S13_quant	0	0	5369.86	5526
jgi|Phlrad1|132033|plus.g3691.t2	S14_quant	2.55364	0.0841914	5381.04	5526
jgi|Phlrad1|132033|plus.g3691.t2	S15_quant	4.50347	0.144317	5353.79	5526
jgi|Phlrad1|132033|plus.g3691.t2	S16_quant	0	0	5353.87	5526
jgi|Phlrad1|132033|plus.g3691.t2	S17_quant	1.32563	0.0436764	5379.57	5526
jgi|Phlrad1|132033|plus.g3691.t2	S18_quant	1.04858	0.0336707	5355.98	5526
jgi|Phlrad1|132034|plus.g3691.t1	S13_quant	7.10104	0.801226	1550.86	1707
jgi|Phlrad1|132034|plus.g3691.t1	S14_quant	2.88343	0.327486	1562.04	1707
jgi|Phlrad1|132034|plus.g3691.t1	S15_quant	0.850599	0.0950838	1534.79	1707
jgi|Phlrad1|132034|plus.g3691.t1	S16_quant	2.05898	0.229962	1534.87	1707
jgi|Phlrad1|132034|plus.g3691.t1	S17_quant	0.556521	0.0632076	1560.57	1707
jgi|Phlrad1|132034|plus.g3691.t1	S18_quant	0	0	1536.98	1707
jgi|Phlrad1|132035|minus.g3654.t1	S13_quant	0	0	737.856	894
jgi|Phlrad1|132035|minus.g3654.t1	S14_quant	0	0	749.035	894
jgi|Phlrad1|132035|minus.g3654.t1	S15_quant	0	0	721.795	894
jgi|Phlrad1|132035|minus.g3654.t1	S16_quant	0	0	721.869	894
jgi|Phlrad1|132035|minus.g3654.t1	S17_quant	0	0	747.572	894
jgi|Phlrad1|132035|minus.g3654.t1	S18_quant	0	0	723.981	894
jgi|Phlrad1|132036|plus.g3693.t1	S13_quant	0	0	1085.86	1242
jgi|Phlrad1|132036|plus.g3693.t1	S14_quant	0	0	1097.04	1242
jgi|Phlrad1|132036|plus.g3693.t1	S15_quant	0	0	1069.79	1242
jgi|Phlrad1|132036|plus.g3693.t1	S16_quant	0	0	1069.87	1242
jgi|Phlrad1|132036|plus.g3693.t1	S17_quant	0	0	1095.57	1242
jgi|Phlrad1|132036|plus.g3693.t1	S18_quant	0	0	1071.98	1242
jgi|Phlrad1|132037|plus.g3694.t1	S13_quant	0	0	1286.86	1443
jgi|Phlrad1|132037|plus.g3694.t1	S14_quant	0	0	1298.04	1443
jgi|Phlrad1|132037|plus.g3694.t1	S15_quant	1.07081	0.144567	1270.79	1443
jgi|Phlrad1|132037|plus.g3694.t1	S16_quant	1.02949	0.138866	1270.87	1443
jgi|Phlrad1|132037|plus.g3694.t1	S17_quant	2.82323	0.385941	1296.57	1443
jgi|Phlrad1|132037|plus.g3694.t1	S18_quant	1.04858	0.141667	1272.98	1443
jgi|Phlrad1|132038|plus.g3695.t1	S13_quant	0	0	2501.86	2658
jgi|Phlrad1|132038|plus.g3695.t1	S14_quant	0	0	2513.04	2658
jgi|Phlrad1|132038|plus.g3695.t1	S15_quant	0	0	2485.79	2658
jgi|Phlrad1|132038|plus.g3695.t1	S16_quant	0	0	2485.87	2658
jgi|Phlrad1|132038|plus.g3695.t1	S17_quant	0	0	2511.57	2658
jgi|Phlrad1|132038|plus.g3695.t1	S18_quant	0	0	2487.98	2658
jgi|Phlrad1|132039|plus.g3696.t1	S13_quant	0	0	3830.86	3987
jgi|Phlrad1|132039|plus.g3696.t1	S14_quant	0	0	3842.04	3987
jgi|Phlrad1|132039|plus.g3696.t1	S15_quant	0	0	3814.79	3987
jgi|Phlrad1|132039|plus.g3696.t1	S16_quant	0	0	3814.87	3987
jgi|Phlrad1|132039|plus.g3696.t1	S17_quant	0	0	3840.57	3987
jgi|Phlrad1|132039|plus.g3696.t1	S18_quant	0	0	3816.98	3987
jgi|Phlrad1|132040|plus.g3697.t1	S13_quant	13.1876	3.23267	713.856	870
jgi|Phlrad1|132040|plus.g3697.t1	S14_quant	9.96796	2.43905	725.035	870
jgi|Phlrad1|132040|plus.g3697.t1	S15_quant	10.7081	2.6328	697.795	870
jgi|Phlrad1|132040|plus.g3697.t1	S16_quant	7.20642	1.7702	697.869	870
jgi|Phlrad1|132040|plus.g3697.t1	S17_quant	10.3519	2.53576	723.572	870
jgi|Phlrad1|132040|plus.g3697.t1	S18_quant	4.19432	1.03054	699.981	870
jgi|Phlrad1|132041|minus.g3661.t1	S13_quant	27.3897	3.18915	1502.86	1659
jgi|Phlrad1|132041|minus.g3661.t1	S14_quant	36.2471	4.24729	1514.04	1659
jgi|Phlrad1|132041|minus.g3661.t1	S15_quant	29.9828	3.45982	1486.79	1659
jgi|Phlrad1|132041|minus.g3661.t1	S16_quant	19.5603	2.25517	1486.87	1659
jgi|Phlrad1|132041|minus.g3661.t1	S17_quant	29.1734	3.41855	1512.57	1659
jgi|Phlrad1|132041|minus.g3661.t1	S18_quant	25.1659	2.90679	1488.98	1659
jgi|Phlrad1|132042|minus.g3662.t1	S13_quant	23.332	6.15938	662.856	819
jgi|Phlrad1|132042|minus.g3662.t1	S14_quant	14.4988	3.81615	674.035	819
jgi|Phlrad1|132042|minus.g3662.t1	S15_quant	14.9914	3.97656	646.795	819
jgi|Phlrad1|132042|minus.g3662.t1	S16_quant	11.3244	3.00106	646.869	819
jgi|Phlrad1|132042|minus.g3662.t1	S17_quant	15.0572	3.96806	672.572	819
jgi|Phlrad1|132042|minus.g3662.t1	S18_quant	11.5344	3.05669	648.981	819
jgi|Phlrad1|132043|minus.g3663.t1	S13_quant	9.12991	2.67643	596.919	753
jgi|Phlrad1|132043|minus.g3663.t1	S14_quant	9.06178	2.64398	608.035	753
jgi|Phlrad1|132043|minus.g3663.t1	S15_quant	8.56651	2.53054	580.795	753
jgi|Phlrad1|132043|minus.g3663.t1	S16_quant	8.23591	2.43058	580.869	753
jgi|Phlrad1|132043|minus.g3663.t1	S17_quant	15.0572	4.39981	606.572	753
jgi|Phlrad1|132043|minus.g3663.t1	S18_quant	8.38864	2.47472	582.981	753
jgi|Phlrad1|132044|minus.g3664.t1	S13_quant	73.0393	4.86917	2624.86	2781
jgi|Phlrad1|132044|minus.g3664.t1	S14_quant	63.4324	4.26908	2636.04	2781
jgi|Phlrad1|132044|minus.g3664.t1	S15_quant	78.1694	5.14078	2608.79	2781
jgi|Phlrad1|132044|minus.g3664.t1	S16_quant	71.0347	4.66761	2608.87	2781
jgi|Phlrad1|132044|minus.g3664.t1	S17_quant	67.7576	4.55847	2634.57	2781
jgi|Phlrad1|132044|minus.g3664.t1	S18_quant	72.352	4.76581	2610.98	2781
jgi|Phlrad1|132045|plus.g3702.t1	S13_quant	79.1259	10.1446	1364.86	1521
jgi|Phlrad1|132045|plus.g3702.t1	S14_quant	91.524	11.7999	1376.04	1521
jgi|Phlrad1|132045|plus.g3702.t1	S15_quant	82.4527	10.488	1348.79	1521
jgi|Phlrad1|132045|plus.g3702.t1	S16_quant	74.1232	9.42021	1348.87	1521
jgi|Phlrad1|132045|plus.g3702.t1	S17_quant	61.17	7.88756	1374.57	1521
jgi|Phlrad1|132045|plus.g3702.t1	S18_quant	57.6719	7.34184	1350.98	1521
jgi|Phlrad1|132046|minus.g3666.t1	S13_quant	195.786	14.3475	2387.86	2544
jgi|Phlrad1|132046|minus.g3666.t1	S14_quant	212.046	15.6808	2399.04	2544
jgi|Phlrad1|132046|minus.g3666.t1	S15_quant	191.676	13.8651	2371.79	2544
jgi|Phlrad1|132046|minus.g3666.t1	S16_quant	241.93	17.4854	2371.87	2544
jgi|Phlrad1|132046|minus.g3666.t1	S17_quant	263.502	19.4797	2397.57	2544
jgi|Phlrad1|132046|minus.g3666.t1	S18_quant	260.048	18.8393	2373.98	2544
jgi|Phlrad1|132047|plus.g3704.t1	S13_quant	25.3609	4.31334	1028.86	1185
jgi|Phlrad1|132047|plus.g3704.t1	S14_quant	14.4988	2.4732	1040.04	1185
jgi|Phlrad1|132047|plus.g3704.t1	S15_quant	18.2038	3.08371	1012.79	1185
jgi|Phlrad1|132047|plus.g3704.t1	S16_quant	17.5013	2.96206	1012.87	1185
jgi|Phlrad1|132047|plus.g3704.t1	S17_quant	17.8805	3.0515	1038.57	1185
jgi|Phlrad1|132047|plus.g3704.t1	S18_quant	14.6801	2.48749	1014.98	1185
jgi|Phlrad1|132048|plus.g3705.t1	S13_quant	6.08661	7.99471	133.222	276
jgi|Phlrad1|132048|plus.g3705.t1	S14_quant	3.62471	4.47925	143.563	276
jgi|Phlrad1|132048|plus.g3705.t1	S15_quant	5.35407	7.57995	121.185	276
jgi|Phlrad1|132048|plus.g3705.t1	S16_quant	4.11796	5.97959	118.055	276
jgi|Phlrad1|132048|plus.g3705.t1	S17_quant	7.52862	9.36626	142.469	276
jgi|Phlrad1|132048|plus.g3705.t1	S18_quant	4.19432	5.94546	121.329	276
jgi|Phlrad1|132049|plus.g3706.t1	S13_quant	14.2021	2.28237	1088.86	1245
jgi|Phlrad1|132049|plus.g3706.t1	S14_quant	12.6865	2.04602	1100.04	1245
jgi|Phlrad1|132049|plus.g3706.t1	S15_quant	9.63733	1.54125	1072.79	1245
jgi|Phlrad1|132049|plus.g3706.t1	S16_quant	13.3834	2.13843	1072.87	1245
jgi|Phlrad1|132049|plus.g3706.t1	S17_quant	14.1162	2.27751	1098.57	1245
jgi|Phlrad1|132049|plus.g3706.t1	S18_quant	10.4858	1.67761	1074.98	1245
jgi|Phlrad1|132050|minus.g3669.t1	S13_quant	226.219	23.4391	1688.86	1845
jgi|Phlrad1|132050|minus.g3669.t1	S14_quant	198.453	20.7097	1700.04	1845
jgi|Phlrad1|132050|minus.g3669.t1	S15_quant	174.543	17.9016	1672.79	1845
jgi|Phlrad1|132050|minus.g3669.t1	S16_quant	198.691	20.3607	1672.87	1845
jgi|Phlrad1|132050|minus.g3669.t1	S17_quant	223.035	23.2735	1698.57	1845
jgi|Phlrad1|132050|minus.g3669.t1	S18_quant	214.959	22.0717	1674.98	1845
jgi|Phlrad1|132051|plus.g3708.t1	S13_quant	90.2847	13.2001	1196.86	1353
jgi|Phlrad1|132051|plus.g3708.t1	S14_quant	90.6178	13.3079	1208.04	1353
jgi|Phlrad1|132051|plus.g3708.t1	S15_quant	124.214	18.048	1180.79	1353
jgi|Phlrad1|132051|plus.g3708.t1	S16_quant	70.0053	10.1626	1180.87	1353
jgi|Phlrad1|132051|plus.g3708.t1	S17_quant	56.4646	8.29459	1206.57	1353
jgi|Phlrad1|132051|plus.g3708.t1	S18_quant	72.352	10.5187	1182.98	1353
jgi|Phlrad1|132052|minus.g3671.t1	S13_quant	3.0433	2.90208	183.502	333
jgi|Phlrad1|132052|minus.g3671.t1	S14_quant	1.81236	1.65591	194.17	333
jgi|Phlrad1|132052|minus.g3671.t1	S15_quant	4.28326	4.35132	168.883	333
jgi|Phlrad1|132052|minus.g3671.t1	S16_quant	0	0	167.798	333
jgi|Phlrad1|132052|minus.g3671.t1	S17_quant	0.941077	0.864928	192.849	333
jgi|Phlrad1|132052|minus.g3671.t1	S18_quant	2.09716	2.11278	170.713	333
jgi|Phlrad1|132053|minus.g3672.t1	S13_quant	2946.93	226.485	2276.86	2433
jgi|Phlrad1|132053|minus.g3672.t1	S14_quant	2329.78	180.645	2288.04	2433
jgi|Phlrad1|132053|minus.g3672.t1	S15_quant	2823.74	214.287	2260.79	2433
jgi|Phlrad1|132053|minus.g3672.t1	S16_quant	2026.03	153.62	2260.87	2433
jgi|Phlrad1|132053|minus.g3672.t1	S17_quant	3786.9	293.542	2286.57	2433
jgi|Phlrad1|132053|minus.g3672.t1	S18_quant	2251.3	171.097	2262.98	2433
jgi|Phlrad1|132054|minus.g3673.t1	S13_quant	306.328	172.874	310.071	465
jgi|Phlrad1|132054|minus.g3673.t1	S14_quant	254.544	140.714	320.923	465
jgi|Phlrad1|132054|minus.g3673.t1	S15_quant	276.229	161.069	294.23	465
jgi|Phlrad1|132054|minus.g3673.t1	S16_quant	185.234	108.056	293.864	465
jgi|Phlrad1|132054|minus.g3673.t1	S17_quant	377.258	209.438	319.267	465
jgi|Phlrad1|132054|minus.g3673.t1	S18_quant	213.884	124.26	296.03	465
jgi|Phlrad1|132055|plus.g3710.t1	S13_quant	38.5795	5.44929	1238.86	1395
jgi|Phlrad1|132055|plus.g3710.t1	S14_quant	34.5262	4.90006	1250.04	1395
jgi|Phlrad1|132055|plus.g3710.t1	S15_quant	46.0863	6.46622	1222.79	1395
jgi|Phlrad1|132055|plus.g3710.t1	S16_quant	28.9001	4.05131	1222.87	1395
jgi|Phlrad1|132055|plus.g3710.t1	S17_quant	46.2272	6.56228	1248.57	1395
jgi|Phlrad1|132055|plus.g3710.t1	S18_quant	23.0954	3.24255	1224.98	1395
jgi|Phlrad1|132056|plus.g3711.t1	S13_quant	37.5341	21.8065	301.193	456
jgi|Phlrad1|132056|plus.g3711.t1	S14_quant	19.0297	10.8211	311.986	456
jgi|Phlrad1|132056|plus.g3711.t1	S15_quant	14.9914	9.00904	285.493	456
jgi|Phlrad1|132056|plus.g3711.t1	S16_quant	10.2949	6.19086	285.067	456
jgi|Phlrad1|132056|plus.g3711.t1	S17_quant	16.9394	9.67195	310.424	456
jgi|Phlrad1|132056|plus.g3711.t1	S18_quant	8.38864	5.02332	287.204	456
jgi|Phlrad1|132057|minus.g3675.t1	S13_quant	18.2598	2.73832	1166.86	1323
jgi|Phlrad1|132057|minus.g3675.t1	S14_quant	19.0297	2.86582	1178.04	1323
jgi|Phlrad1|132057|minus.g3675.t1	S15_quant	23.5579	3.51213	1150.79	1323
jgi|Phlrad1|132057|minus.g3675.t1	S16_quant	15.4423	2.30019	1150.87	1323
jgi|Phlrad1|132057|minus.g3675.t1	S17_quant	17.8805	2.69359	1176.57	1323
jgi|Phlrad1|132057|minus.g3675.t1	S18_quant	15.7287	2.34617	1152.98	1323
jgi|Phlrad1|132058|plus.g3713.t1	S13_quant	57.8228	6.62682	1526.86	1683
jgi|Phlrad1|132058|plus.g3713.t1	S14_quant	55.2768	6.37604	1538.04	1683
jgi|Phlrad1|132058|plus.g3713.t1	S15_quant	41.7618	4.74248	1510.79	1683
jgi|Phlrad1|132058|plus.g3713.t1	S16_quant	45.2975	5.13953	1510.87	1683
jgi|Phlrad1|132058|plus.g3713.t1	S17_quant	33.8788	3.90793	1536.57	1683
jgi|Phlrad1|132058|plus.g3713.t1	S18_quant	36.7003	4.17182	1512.98	1683
jgi|Phlrad1|132059|plus.g3714.t1	S13_quant	28.4042	3.13813	1583.86	1740
jgi|Phlrad1|132059|plus.g3714.t1	S14_quant	39.8718	4.43476	1595.04	1740
jgi|Phlrad1|132059|plus.g3714.t1	S15_quant	48.1866	5.27314	1567.79	1740
jgi|Phlrad1|132059|plus.g3714.t1	S16_quant	48.386	5.29037	1567.87	1740
jgi|Phlrad1|132059|plus.g3714.t1	S17_quant	27.2912	3.03545	1593.57	1740
jgi|Phlrad1|132059|plus.g3714.t1	S18_quant	40.8946	4.47983	1569.98	1740
jgi|Phlrad1|132060|minus.g3678.t1	S13_quant	26.3753	3.2876	1403.86	1560
jgi|Phlrad1|132060|minus.g3678.t1	S14_quant	37.1533	4.65805	1415.04	1560
jgi|Phlrad1|132060|minus.g3678.t1	S15_quant	34.2661	4.23614	1387.79	1560
jgi|Phlrad1|132060|minus.g3678.t1	S16_quant	26.7667	3.30615	1387.87	1560
jgi|Phlrad1|132060|minus.g3678.t1	S17_quant	34.8199	4.36597	1413.57	1560
jgi|Phlrad1|132060|minus.g3678.t1	S18_quant	19.923	2.46511	1389.98	1560
jgi|Phlrad1|132061|minus.g3679.t1	S13_quant	72.0248	15.9768	788.856	945
jgi|Phlrad1|132061|minus.g3679.t1	S14_quant	88.8054	19.6927	800.035	945
jgi|Phlrad1|132061|minus.g3679.t1	S15_quant	74.957	16.641	772.795	945
jgi|Phlrad1|132061|minus.g3679.t1	S16_quant	67.9463	15.0708	772.869	945
jgi|Phlrad1|132061|minus.g3679.t1	S17_quant	80.9327	17.9631	798.572	945
jgi|Phlrad1|132061|minus.g3679.t1	S18_quant	92.275	20.4778	774.981	945
jgi|Phlrad1|132062|minus.g3680.t1	S13_quant	80.1403	17.2521	812.856	969
jgi|Phlrad1|132062|minus.g3680.t1	S14_quant	70.6819	15.2173	824.035	969
jgi|Phlrad1|132062|minus.g3680.t1	S15_quant	92.09	19.8289	796.795	969
jgi|Phlrad1|132062|minus.g3680.t1	S16_quant	100.89	21.7039	796.869	969
jgi|Phlrad1|132062|minus.g3680.t1	S17_quant	98.8131	21.2918	822.572	969
jgi|Phlrad1|132062|minus.g3680.t1	S18_quant	89.1293	19.1855	798.981	969
jgi|Phlrad1|132063|minus.g3681.t1	S13_quant	75.0681	16.5261	794.856	951
jgi|Phlrad1|132063|minus.g3681.t1	S14_quant	78.8375	17.3521	806.035	951
jgi|Phlrad1|132063|minus.g3681.t1	S15_quant	61.0364	13.4461	778.795	951
jgi|Phlrad1|132063|minus.g3681.t1	S16_quant	72.0642	15.861	778.869	951
jgi|Phlrad1|132063|minus.g3681.t1	S17_quant	93.1667	20.5242	804.572	951
jgi|Phlrad1|132063|minus.g3681.t1	S18_quant	76.5463	16.8567	780.981	951
jgi|Phlrad1|132064|minus.g3682.t1	S13_quant	75.0681	16.4023	800.856	957
jgi|Phlrad1|132064|minus.g3682.t1	S14_quant	62.5263	13.6603	812.035	957
jgi|Phlrad1|132064|minus.g3682.t1	S15_quant	81.3819	17.7911	784.795	957
jgi|Phlrad1|132064|minus.g3682.t1	S16_quant	66.9168	14.6155	784.869	957
jgi|Phlrad1|132064|minus.g3682.t1	S17_quant	78.1094	17.0798	810.572	957
jgi|Phlrad1|132064|minus.g3682.t1	S18_quant	82.8378	18.1031	786.981	957
jgi|Phlrad1|132065|plus.g3720.t1	S13_quant	61.8805	19.9445	542.919	699
jgi|Phlrad1|132065|plus.g3720.t1	S14_quant	85.1807	27.2758	554.035	699
jgi|Phlrad1|132065|plus.g3720.t1	S15_quant	46.045	14.9943	526.85	699
jgi|Phlrad1|132065|plus.g3720.t1	S16_quant	45.2975	14.7383	526.869	699
jgi|Phlrad1|132065|plus.g3720.t1	S17_quant	55.5236	17.8098	552.572	699
jgi|Phlrad1|132065|plus.g3720.t1	S18_quant	38.7975	12.6127	529.036	699
jgi|Phlrad1|132066|plus.g3721.t1	S13_quant	445.337	32.071	2429.86	2586
jgi|Phlrad1|132066|plus.g3721.t1	S14_quant	322.599	23.4457	2441.04	2586
jgi|Phlrad1|132066|plus.g3721.t1	S15_quant	405.839	28.8459	2413.79	2586
jgi|Phlrad1|132066|plus.g3721.t1	S16_quant	118.391	8.40779	2413.87	2586
jgi|Phlrad1|132066|plus.g3721.t1	S17_quant	333.141	24.204	2439.57	2586
jgi|Phlrad1|132066|plus.g3721.t1	S18_quant	187.696	13.3614	2415.98	2586
jgi|Phlrad1|132067|plus.g3722.t1	S13_quant	54.4478	6.56238	1451.86	1608
jgi|Phlrad1|132067|plus.g3722.t1	S14_quant	44.4532	5.39042	1463.04	1608
jgi|Phlrad1|132067|plus.g3722.t1	S15_quant	47.5099	5.67706	1435.79	1608
jgi|Phlrad1|132067|plus.g3722.t1	S16_quant	68.137	8.13475	1435.87	1608
jgi|Phlrad1|132067|plus.g3722.t1	S17_quant	56.4681	6.84785	1461.57	1608
jgi|Phlrad1|132067|plus.g3722.t1	S18_quant	53.7156	6.42446	1437.98	1608
jgi|Phlrad1|132068|minus.g3685.t1	S13_quant	353.023	107.262	575.919	732
jgi|Phlrad1|132068|minus.g3685.t1	S14_quant	300.851	90.9204	587.035	732
jgi|Phlrad1|132068|minus.g3685.t1	S15_quant	337.306	103.378	559.795	732
jgi|Phlrad1|132068|minus.g3685.t1	S16_quant	239.871	73.4459	559.869	732
jgi|Phlrad1|132068|minus.g3685.t1	S17_quant	319.966	96.849	585.572	732
jgi|Phlrad1|132068|minus.g3685.t1	S18_quant	248.513	76.0533	561.981	732
jgi|Phlrad1|132069|plus.g3724.t1	S13_quant	38.5485	2.75904	2444.86	2601
jgi|Phlrad1|132069|plus.g3724.t1	S14_quant	28.9977	2.09461	2456.04	2601
jgi|Phlrad1|132069|plus.g3724.t1	S15_quant	22.4871	1.58845	2428.79	2601
jgi|Phlrad1|132069|plus.g3724.t1	S16_quant	40.1501	2.83373	2428.87	2601
jgi|Phlrad1|132069|plus.g3724.t1	S17_quant	43.2896	3.12593	2454.57	2601
jgi|Phlrad1|132069|plus.g3724.t1	S18_quant	27.2631	1.92878	2430.98	2601
jgi|Phlrad1|132070|minus.g3687.t1	S13_quant	98.4001	24.0197	716.856	873
jgi|Phlrad1|132070|minus.g3687.t1	S14_quant	126.865	30.9146	728.035	873
jgi|Phlrad1|132070|minus.g3687.t1	S15_quant	107.081	26.2153	700.795	873
jgi|Phlrad1|132070|minus.g3687.t1	S16_quant	91.6245	22.4105	700.869	873
jgi|Phlrad1|132070|minus.g3687.t1	S17_quant	80.9327	19.7432	726.572	873
jgi|Phlrad1|132070|minus.g3687.t1	S18_quant	93.3236	22.8317	702.981	873
jgi|Phlrad1|132071|minus.g3688.t1	S13_quant	422.336	56.7675	1301.86	1458
jgi|Phlrad1|132071|minus.g3688.t1	S14_quant	371.482	50.1922	1313.04	1458
jgi|Phlrad1|132071|minus.g3688.t1	S15_quant	358.329	47.8125	1285.79	1458
jgi|Phlrad1|132071|minus.g3688.t1	S16_quant	400.281	53.3635	1285.87	1458
jgi|Phlrad1|132071|minus.g3688.t1	S17_quant	344.431	46.5459	1311.57	1458
jgi|Phlrad1|132071|minus.g3688.t1	S18_quant	400.32	53.4548	1287.98	1458
jgi|Phlrad1|132072|plus.g3727.t1	S13_quant	19.2743	9.5986	351.378	507
jgi|Phlrad1|132072|plus.g3727.t1	S14_quant	28.9977	14.1907	362.522	507
jgi|Phlrad1|132072|plus.g3727.t1	S15_quant	10.7081	5.47374	335.631	507
jgi|Phlrad1|132072|plus.g3727.t1	S16_quant	19.5603	9.9948	335.488	507
jgi|Phlrad1|132072|plus.g3727.t1	S17_quant	18.8215	9.24448	360.865	507
jgi|Phlrad1|132072|plus.g3727.t1	S18_quant	12.583	6.40973	337.623	507
jgi|Phlrad1|132073|plus.g3728.t1	S13_quant	8.11547	3.40433	417.145	573
jgi|Phlrad1|132073|plus.g3728.t1	S14_quant	14.4988	6.00869	428.083	573
jgi|Phlrad1|132073|plus.g3728.t1	S15_quant	16.0622	6.87321	400.938	573
jgi|Phlrad1|132073|plus.g3728.t1	S16_quant	18.5308	7.92008	401.089	573
jgi|Phlrad1|132073|plus.g3728.t1	S17_quant	13.1751	5.47319	426.662	573
jgi|Phlrad1|132073|plus.g3728.t1	S18_quant	13.6315	5.81469	403.189	573
jgi|Phlrad1|132074|minus.g3691.t1	S13_quant	170.425	23.671	1259.86	1416
jgi|Phlrad1|132074|minus.g3691.t1	S14_quant	169.455	23.6522	1271.04	1416
jgi|Phlrad1|132074|minus.g3691.t1	S15_quant	184.18	25.4054	1243.79	1416
jgi|Phlrad1|132074|minus.g3691.t1	S16_quant	181.19	24.971	1243.87	1416
jgi|Phlrad1|132074|minus.g3691.t1	S17_quant	197.626	27.5904	1269.57	1416
jgi|Phlrad1|132074|minus.g3691.t1	S18_quant	182.453	25.1843	1245.98	1416
jgi|Phlrad1|132075|minus.g3692.t1	S13_quant	130.862	12.7653	1793.86	1950
jgi|Phlrad1|132075|minus.g3692.t1	S14_quant	129.583	12.7361	1805.04	1950
jgi|Phlrad1|132075|minus.g3692.t1	S15_quant	141.347	13.6408	1777.79	1950
jgi|Phlrad1|132075|minus.g3692.t1	S16_quant	156.482	15.0883	1777.87	1950
jgi|Phlrad1|132075|minus.g3692.t1	S17_quant	121.399	11.9303	1803.57	1950
jgi|Phlrad1|132075|minus.g3692.t1	S18_quant	130.024	12.5631	1779.98	1950
jgi|Phlrad1|132076|plus.g3731.t1	S13_quant	97.3857	34.0162	500.973	657
jgi|Phlrad1|132076|plus.g3731.t1	S14_quant	99.6796	34.5367	512.035	657
jgi|Phlrad1|132076|plus.g3731.t1	S15_quant	70.6737	25.0082	484.85	657
jgi|Phlrad1|132076|plus.g3731.t1	S16_quant	60.7399	21.4746	484.868	657
jgi|Phlrad1|132076|plus.g3731.t1	S17_quant	63.0522	21.8884	510.572	657
jgi|Phlrad1|132076|plus.g3731.t1	S18_quant	75.4977	26.6544	487.141	657
jgi|Phlrad1|132077|minus.g3694.t1	S13_quant	104.487	10.0912	1811.86	1968
jgi|Phlrad1|132077|minus.g3694.t1	S14_quant	91.524	8.90664	1823.04	1968
jgi|Phlrad1|132077|minus.g3694.t1	S15_quant	93.1608	8.90038	1795.79	1968
jgi|Phlrad1|132077|minus.g3694.t1	S16_quant	97.8015	9.3357	1795.87	1968
jgi|Phlrad1|132077|minus.g3694.t1	S17_quant	87.5202	8.51596	1821.57	1968
jgi|Phlrad1|132077|minus.g3694.t1	S18_quant	81.7892	7.82349	1797.98	1968
jgi|Phlrad1|132078|plus.g3733.t1	S13_quant	123.761	47.4951	455.973	612
jgi|Phlrad1|132078|plus.g3733.t1	S14_quant	115.085	43.7117	467.083	612
jgi|Phlrad1|132078|plus.g3733.t1	S15_quant	112.435	43.8514	439.898	612
jgi|Phlrad1|132078|plus.g3733.t1	S16_quant	92.654	36.1015	439.962	612
jgi|Phlrad1|132078|plus.g3733.t1	S17_quant	95.0488	36.1852	465.572	612
jgi|Phlrad1|132078|plus.g3733.t1	S18_quant	82.8378	32.2189	442.189	612
jgi|Phlrad1|132079|plus.g3734.t1	S13_quant	360.124	54.1449	1163.86	1320
jgi|Phlrad1|132079|plus.g3734.t1	S14_quant	362.471	54.7264	1175.04	1320
jgi|Phlrad1|132079|plus.g3734.t1	S15_quant	341.59	51.059	1147.79	1320
jgi|Phlrad1|132079|plus.g3734.t1	S16_quant	252.225	37.6679	1147.87	1320
jgi|Phlrad1|132079|plus.g3734.t1	S17_quant	221.153	33.4006	1173.57	1320
jgi|Phlrad1|132079|plus.g3734.t1	S18_quant	233.833	34.9708	1149.98	1320
jgi|Phlrad1|132080|plus.g3735.t1	S13_quant	97.3857	14.132	1205.86	1362
jgi|Phlrad1|132080|plus.g3735.t1	S14_quant	98.7734	14.3983	1217.04	1362
jgi|Phlrad1|132080|plus.g3735.t1	S15_quant	82.4527	11.8895	1189.79	1362
jgi|Phlrad1|132080|plus.g3735.t1	S16_quant	60.7399	8.75086	1189.87	1362
jgi|Phlrad1|132080|plus.g3735.t1	S17_quant	52.7003	7.6843	1215.57	1362
jgi|Phlrad1|132080|plus.g3735.t1	S18_quant	48.2347	6.95953	1191.98	1362
jgi|Phlrad1|132081|plus.g3736.t1	S13_quant	57.8228	8.80719	1148.86	1305
jgi|Phlrad1|132081|plus.g3736.t1	S14_quant	56.183	8.59227	1160.04	1305
jgi|Phlrad1|132081|plus.g3736.t1	S15_quant	49.2575	7.46024	1132.79	1305
jgi|Phlrad1|132081|plus.g3736.t1	S16_quant	48.386	7.32177	1132.87	1305
jgi|Phlrad1|132081|plus.g3736.t1	S17_quant	46.1128	7.05456	1158.57	1305
jgi|Phlrad1|132081|plus.g3736.t1	S18_quant	48.2347	7.30904	1134.98	1305
jgi|Phlrad1|132082|plus.g3737.t1	S13_quant	364.182	34.1542	1865.86	2022
jgi|Phlrad1|132082|plus.g3737.t1	S14_quant	332.567	31.4327	1877.04	2022
jgi|Phlrad1|132082|plus.g3737.t1	S15_quant	350.156	32.4766	1849.79	2022
jgi|Phlrad1|132082|plus.g3737.t1	S16_quant	278.992	25.8539	1849.87	2022
jgi|Phlrad1|132082|plus.g3737.t1	S17_quant	377.372	35.6621	1875.57	2022
jgi|Phlrad1|132082|plus.g3737.t1	S18_quant	353.371	32.8159	1851.98	2022
jgi|Phlrad1|132083|minus.g3698.t1	S13_quant	409.831	53.7248	1334.86	1491
jgi|Phlrad1|132083|minus.g3698.t1	S14_quant	416.842	54.94	1346.04	1491
jgi|Phlrad1|132083|minus.g3698.t1	S15_quant	414.405	53.9113	1318.79	1491
jgi|Phlrad1|132083|minus.g3698.t1	S16_quant	676.374	87.9147	1318.87	1491
jgi|Phlrad1|132083|minus.g3698.t1	S17_quant	506.3	66.7413	1344.57	1491
jgi|Phlrad1|132083|minus.g3698.t1	S18_quant	584.059	76.0414	1320.98	1491
jgi|Phlrad1|132084|minus.g3699.t1	S13_quant	60.8661	7.44361	1430.86	1587
jgi|Phlrad1|132084|minus.g3699.t1	S14_quant	67.9633	8.36128	1442.04	1587
jgi|Phlrad1|132084|minus.g3699.t1	S15_quant	69.6029	8.44046	1414.79	1587
jgi|Phlrad1|132084|minus.g3699.t1	S16_quant	75.1527	9.10552	1414.87	1587
jgi|Phlrad1|132084|minus.g3699.t1	S17_quant	81.8737	10.0735	1440.57	1587
jgi|Phlrad1|132084|minus.g3699.t1	S18_quant	69.2063	8.39984	1416.98	1587
jgi|Phlrad1|132085|minus.g3700.t1	S13_quant	286.07	21.5318	2324.86	2481
jgi|Phlrad1|132085|minus.g3700.t1	S14_quant	274.572	20.8522	2336.04	2481
jgi|Phlrad1|132085|minus.g3700.t1	S15_quant	310.536	23.0759	2308.79	2481
jgi|Phlrad1|132085|minus.g3700.t1	S16_quant	282.08	20.9435	2308.87	2481
jgi|Phlrad1|132085|minus.g3700.t1	S17_quant	287.029	21.7916	2334.57	2481
jgi|Phlrad1|132085|minus.g3700.t1	S18_quant	328.205	24.4253	2310.98	2481
jgi|Phlrad1|132086|minus.g3701.t1	S13_quant	64.9238	9.26008	1226.86	1383
jgi|Phlrad1|132086|minus.g3701.t1	S14_quant	66.151	9.47933	1238.04	1383
jgi|Phlrad1|132086|minus.g3701.t1	S15_quant	79.2402	11.2281	1210.79	1383
jgi|Phlrad1|132086|minus.g3701.t1	S16_quant	39.1206	5.5384	1210.87	1383
jgi|Phlrad1|132086|minus.g3701.t1	S17_quant	67.7576	9.71203	1236.57	1383
jgi|Phlrad1|132086|minus.g3701.t1	S18_quant	61.8662	8.77181	1212.98	1383
jgi|Phlrad1|132087|plus.g3741.t1	S13_quant	1038.78	32.2815	5630.86	5787
jgi|Phlrad1|132087|plus.g3741.t1	S14_quant	969.61	30.4885	5642.04	5787
jgi|Phlrad1|132087|plus.g3741.t1	S15_quant	1140.42	34.8467	5614.79	5787
jgi|Phlrad1|132087|plus.g3741.t1	S16_quant	961.543	29.3566	5614.87	5787
jgi|Phlrad1|132087|plus.g3741.t1	S17_quant	1254.46	39.4188	5640.57	5787
jgi|Phlrad1|132087|plus.g3741.t1	S18_quant	1029.71	31.5282	5616.98	5787
jgi|Phlrad1|132088|plus.g3742.t1	S13_quant	69.4812	11.45	1061.86	1218
jgi|Phlrad1|132088|plus.g3742.t1	S14_quant	25.4341	4.20511	1073.04	1218
jgi|Phlrad1|132088|plus.g3742.t1	S15_quant	56.9784	9.3475	1045.79	1218
jgi|Phlrad1|132088|plus.g3742.t1	S16_quant	98.3504	16.1204	1045.87	1218
jgi|Phlrad1|132088|plus.g3742.t1	S17_quant	84.7623	14.0201	1071.57	1218
jgi|Phlrad1|132088|plus.g3742.t1	S18_quant	114.773	18.8354	1047.98	1218
jgi|Phlrad1|132089|plus.g3742.t2	S13_quant	81.6695	13.6514	1046.86	1203
jgi|Phlrad1|132089|plus.g3742.t2	S14_quant	140.396	23.5413	1058.04	1203
jgi|Phlrad1|132089|plus.g3742.t2	S15_quant	100.431	16.7159	1030.79	1203
jgi|Phlrad1|132089|plus.g3742.t2	S16_quant	117.842	19.5963	1030.87	1203
jgi|Phlrad1|132089|plus.g3742.t2	S17_quant	171.211	28.7213	1056.57	1203
jgi|Phlrad1|132089|plus.g3742.t2	S18_quant	148.421	24.7111	1032.98	1203
jgi|Phlrad1|132090|minus.g3704.t1	S13_quant	41.5918	33.5454	216.96	369
jgi|Phlrad1|132090|minus.g3704.t1	S14_quant	38.0595	29.6072	228.055	369
jgi|Phlrad1|132090|minus.g3704.t1	S15_quant	28.912	24.558	201.984	369
jgi|Phlrad1|132090|minus.g3704.t1	S16_quant	37.0616	31.5864	201.141	369
jgi|Phlrad1|132090|minus.g3704.t1	S17_quant	36.702	28.7675	226.131	369
jgi|Phlrad1|132090|minus.g3704.t1	S18_quant	30.4088	25.6695	203.738	369
jgi|Phlrad1|132091|plus.g3743.t1	S13_quant	245.493	25.6182	1676.86	1833
jgi|Phlrad1|132091|plus.g3743.t1	S14_quant	210.233	22.095	1688.04	1833
jgi|Phlrad1|132091|plus.g3743.t1	S15_quant	204.526	21.1282	1660.79	1833
jgi|Phlrad1|132091|plus.g3743.t1	S16_quant	260.461	26.8833	1660.87	1833
jgi|Phlrad1|132091|plus.g3743.t1	S17_quant	238.093	25.0214	1686.57	1833
jgi|Phlrad1|132091|plus.g3743.t1	S18_quant	272.631	28.1953	1662.98	1833
jgi|Phlrad1|132092|minus.g3706.t1	S13_quant	41.5918	6.06573	1199.86	1356
jgi|Phlrad1|132092|minus.g3706.t1	S14_quant	43.4965	6.37195	1211.04	1356
jgi|Phlrad1|132092|minus.g3706.t1	S15_quant	44.9742	6.51807	1183.79	1356
jgi|Phlrad1|132092|minus.g3706.t1	S16_quant	39.1206	5.66471	1183.87	1356
jgi|Phlrad1|132092|minus.g3706.t1	S17_quant	47.9949	7.03291	1209.57	1356
jgi|Phlrad1|132092|minus.g3706.t1	S18_quant	60.8176	8.81945	1185.98	1356
jgi|Phlrad1|132093|plus.g3745.t1	S13_quant	179.555	23.1733	1355.86	1512
jgi|Phlrad1|132093|plus.g3745.t1	S14_quant	192.11	24.9312	1367.04	1512
jgi|Phlrad1|132093|plus.g3745.t1	S15_quant	197.03	25.2305	1339.79	1512
jgi|Phlrad1|132093|plus.g3745.t1	S16_quant	158.541	20.2841	1339.87	1512
jgi|Phlrad1|132093|plus.g3745.t1	S17_quant	238.093	30.9031	1365.57	1512
jgi|Phlrad1|132093|plus.g3745.t1	S18_quant	169.87	21.7701	1341.98	1512
jgi|Phlrad1|132094|minus.g3708.t1	S13_quant	874.442	49.2351	3107.86	3264
jgi|Phlrad1|132094|minus.g3708.t1	S14_quant	836.402	47.5739	3119.04	3264
jgi|Phlrad1|132094|minus.g3708.t1	S15_quant	804.181	44.6247	3091.79	3264
jgi|Phlrad1|132094|minus.g3708.t1	S16_quant	751.527	41.6677	3091.87	3264
jgi|Phlrad1|132094|minus.g3708.t1	S17_quant	694.515	39.4854	3117.57	3264
jgi|Phlrad1|132094|minus.g3708.t1	S18_quant	741.346	41.2091	3093.98	3264
jgi|Phlrad1|132095|plus.g3747.t1	S13_quant	66.9527	14.9655	782.856	939
jgi|Phlrad1|132095|plus.g3747.t1	S14_quant	58.9016	13.1602	794.035	939
jgi|Phlrad1|132095|plus.g3747.t1	S15_quant	68.5321	15.3337	766.795	939
jgi|Phlrad1|132095|plus.g3747.t1	S16_quant	61.7693	13.8079	766.869	939
jgi|Phlrad1|132095|plus.g3747.t1	S17_quant	49.8771	11.1541	792.572	939
jgi|Phlrad1|132095|plus.g3747.t1	S18_quant	56.6233	12.664	768.981	939
jgi|Phlrad1|132096|minus.g3710.t1	S13_quant	243.464	46.8753	908.856	1065
jgi|Phlrad1|132096|minus.g3710.t1	S14_quant	245.574	47.3535	920.035	1065
jgi|Phlrad1|132096|minus.g3710.t1	S15_quant	244.146	46.9169	892.795	1065
jgi|Phlrad1|132096|minus.g3710.t1	S16_quant	236.782	45.4609	892.869	1065
jgi|Phlrad1|132096|minus.g3710.t1	S17_quant	224.917	43.3992	918.572	1065
jgi|Phlrad1|132096|minus.g3710.t1	S18_quant	205.522	39.4942	894.981	1065
jgi|Phlrad1|132097|plus.g3749.t1	S13_quant	103.472	51.973	348.378	504
jgi|Phlrad1|132097|plus.g3749.t1	S14_quant	95.1487	46.9517	359.522	504
jgi|Phlrad1|132097|plus.g3749.t1	S15_quant	94.2316	48.5985	332.664	504
jgi|Phlrad1|132097|plus.g3749.t1	S16_quant	85.4476	44.051	332.522	504
jgi|Phlrad1|132097|plus.g3749.t1	S17_quant	103.519	51.2709	357.865	504
jgi|Phlrad1|132097|plus.g3749.t1	S18_quant	105.907	54.4268	334.657	504
jgi|Phlrad1|132098|minus.g3711.t2	S13_quant	498	25.238	3452.86	3609
jgi|Phlrad1|132098|minus.g3711.t2	S14_quant	546.838	28.006	3464.04	3609
jgi|Phlrad1|132098|minus.g3711.t2	S15_quant	533.265	26.6208	3436.79	3609
jgi|Phlrad1|132098|minus.g3711.t2	S16_quant	527.38	26.3049	3436.87	3609
jgi|Phlrad1|132098|minus.g3711.t2	S17_quant	506.3	25.9167	3462.57	3609
jgi|Phlrad1|132098|minus.g3711.t2	S18_quant	503.424	25.1764	3438.98	3609
jgi|Phlrad1|132099|minus.g3711.t1	S13_quant	32.5487	1.65817	3434.86	3591
jgi|Phlrad1|132099|minus.g3711.t1	S14_quant	19.5231	1.00508	3446.04	3591
jgi|Phlrad1|132099|minus.g3711.t1	S15_quant	0	0	3418.79	3591
jgi|Phlrad1|132099|minus.g3711.t1	S16_quant	39.869	1.99907	3418.87	3591
jgi|Phlrad1|132099|minus.g3711.t1	S17_quant	0	0	3444.57	3591
jgi|Phlrad1|132099|minus.g3711.t1	S18_quant	103.704	5.21355	3420.98	3591
jgi|Phlrad1|132100|plus.g3751.t1	S13_quant	203.901	30.7359	1160.86	1317
jgi|Phlrad1|132100|plus.g3751.t1	S14_quant	194.828	29.4907	1172.04	1317
jgi|Phlrad1|132100|plus.g3751.t1	S15_quant	162.764	24.3928	1144.79	1317
jgi|Phlrad1|132100|plus.g3751.t1	S16_quant	160.6	24.0473	1144.87	1317
jgi|Phlrad1|132100|plus.g3751.t1	S17_quant	178.805	27.074	1170.57	1317
jgi|Phlrad1|132100|plus.g3751.t1	S18_quant	166.724	24.9995	1146.98	1317
jgi|Phlrad1|132101|minus.g3713.t1	S13_quant	506.203	65.6208	1349.86	1506
jgi|Phlrad1|132101|minus.g3713.t1	S14_quant	519.24	67.6819	1361.04	1506
jgi|Phlrad1|132101|minus.g3713.t1	S15_quant	488.291	62.809	1333.79	1506
jgi|Phlrad1|132101|minus.g3713.t1	S16_quant	529.157	68.0061	1333.87	1506
jgi|Phlrad1|132101|minus.g3713.t1	S17_quant	471.48	61.4656	1359.57	1506
jgi|Phlrad1|132101|minus.g3713.t1	S18_quant	444.598	57.2344	1335.98	1506
jgi|Phlrad1|132102|plus.g3754.t1	S13_quant	2.02887	4.13377	85.8839	213
jgi|Phlrad1|132102|plus.g3754.t1	S14_quant	1.81236	3.39359	94.7455	213
jgi|Phlrad1|132102|plus.g3754.t1	S15_quant	0	0	77.0049	213
jgi|Phlrad1|132102|plus.g3754.t1	S16_quant	2.05898	5.00736	70.4887	213
jgi|Phlrad1|132102|plus.g3754.t1	S17_quant	3.76431	7.20084	92.656	213
jgi|Phlrad1|132102|plus.g3754.t1	S18_quant	1.04858	2.3943	75.3204	213
jgi|Phlrad1|132103|plus.g3755.t1	S13_quant	106.516	29.7337	626.856	783
jgi|Phlrad1|132103|plus.g3755.t1	S14_quant	110.554	30.7399	638.035	783
jgi|Phlrad1|132103|plus.g3755.t1	S15_quant	107.081	30.0781	610.795	783
jgi|Phlrad1|132103|plus.g3755.t1	S16_quant	147.217	41.3129	610.869	783
jgi|Phlrad1|132103|plus.g3755.t1	S17_quant	95.0488	26.4649	636.572	783
jgi|Phlrad1|132103|plus.g3755.t1	S18_quant	113.247	31.7737	612.981	783
jgi|Phlrad1|132104|plus.g3756.t1	S13_quant	429.106	47.9531	1565.86	1722
jgi|Phlrad1|132104|plus.g3756.t1	S14_quant	427.716	48.1159	1577.04	1722
jgi|Phlrad1|132104|plus.g3756.t1	S15_quant	478.654	52.9882	1549.79	1722
jgi|Phlrad1|132104|plus.g3756.t1	S16_quant	414.884	45.8889	1549.87	1722
jgi|Phlrad1|132104|plus.g3756.t1	S17_quant	591.938	66.59	1575.57	1722
jgi|Phlrad1|132104|plus.g3756.t1	S18_quant	461.375	51.1278	1551.98	1722
jgi|Phlrad1|132105|plus.g3757.t1	S13_quant	42.6062	5.3681	1388.86	1545
jgi|Phlrad1|132105|plus.g3757.t1	S14_quant	55.2768	7.00452	1400.04	1545
jgi|Phlrad1|132105|plus.g3757.t1	S15_quant	47.1158	5.88834	1372.79	1545
jgi|Phlrad1|132105|plus.g3757.t1	S16_quant	45.2975	5.65616	1372.87	1545
jgi|Phlrad1|132105|plus.g3757.t1	S17_quant	42.3485	5.36691	1398.57	1545
jgi|Phlrad1|132105|plus.g3757.t1	S18_quant	47.1861	5.90211	1374.98	1545
jgi|Phlrad1|132106|plus.g3758.t1	S13_quant	148.107	18.8643	1373.86	1530
jgi|Phlrad1|132106|plus.g3758.t1	S14_quant	169.455	21.7054	1385.04	1530
jgi|Phlrad1|132106|plus.g3758.t1	S15_quant	144.56	18.2661	1357.79	1530
jgi|Phlrad1|132106|plus.g3758.t1	S16_quant	109.126	13.7767	1357.87	1530
jgi|Phlrad1|132106|plus.g3758.t1	S17_quant	86.5791	11.0913	1383.57	1530
jgi|Phlrad1|132106|plus.g3758.t1	S18_quant	76.5463	9.68013	1359.98	1530
jgi|Phlrad1|132107|plus.g3759.t1	S13_quant	115.646	15.5443	1301.86	1458
jgi|Phlrad1|132107|plus.g3759.t1	S14_quant	100.586	13.5905	1313.04	1458
jgi|Phlrad1|132107|plus.g3759.t1	S15_quant	130.639	17.4315	1285.79	1458
jgi|Phlrad1|132107|plus.g3759.t1	S16_quant	121.48	16.1951	1285.87	1458
jgi|Phlrad1|132107|plus.g3759.t1	S17_quant	117.635	15.897	1311.57	1458
jgi|Phlrad1|132107|plus.g3759.t1	S18_quant	123.732	16.522	1287.98	1458
jgi|Phlrad1|132108|plus.g3760.t1	S13_quant	185.641	24.5565	1322.86	1479
jgi|Phlrad1|132108|plus.g3760.t1	S14_quant	226.544	30.1273	1334.04	1479
jgi|Phlrad1|132108|plus.g3760.t1	S15_quant	203.455	26.7111	1306.79	1479
jgi|Phlrad1|132108|plus.g3760.t1	S16_quant	195.603	25.6578	1306.87	1479
jgi|Phlrad1|132108|plus.g3760.t1	S17_quant	181.628	24.1581	1332.57	1479
jgi|Phlrad1|132108|plus.g3760.t1	S18_quant	203.424	26.7276	1308.98	1479
jgi|Phlrad1|132109|minus.g3720.t1	S13_quant	40.5774	7.86447	902.856	1059
jgi|Phlrad1|132109|minus.g3720.t1	S14_quant	35.3409	6.85945	914.035	1059
jgi|Phlrad1|132109|minus.g3720.t1	S15_quant	40.6909	7.87239	886.795	1059
jgi|Phlrad1|132109|minus.g3720.t1	S16_quant	42.2091	8.15873	886.869	1059
jgi|Phlrad1|132109|minus.g3720.t1	S17_quant	37.6431	7.31122	912.572	1059
jgi|Phlrad1|132109|minus.g3720.t1	S18_quant	39.846	7.70872	888.981	1059
jgi|Phlrad1|132110|minus.g3721.t1	S13_quant	9.71642	11.2597	151.002	297
jgi|Phlrad1|132110|minus.g3721.t1	S14_quant	4.03684	4.42914	161.695	297
jgi|Phlrad1|132110|minus.g3721.t1	S15_quant	6.42489	7.9936	137.897	297
jgi|Phlrad1|132110|minus.g3721.t1	S16_quant	3.52896	4.45012	135.941	297
jgi|Phlrad1|132110|minus.g3721.t1	S17_quant	5.50364	6.07425	160.594	297
jgi|Phlrad1|132110|minus.g3721.t1	S18_quant	5.35996	6.63909	138.849	297
jgi|Phlrad1|132111|minus.g3721.t2	S13_quant	4.48566	8.92565	87.941	216
jgi|Phlrad1|132111|minus.g3721.t2	S14_quant	11.3682	20.8308	96.8189	216
jgi|Phlrad1|132111|minus.g3721.t2	S15_quant	0	0	79.0578	216
jgi|Phlrad1|132111|minus.g3721.t2	S16_quant	4.70695	11.1329	72.4782	216
jgi|Phlrad1|132111|minus.g3721.t2	S17_quant	2.02498	3.78528	94.8186	216
jgi|Phlrad1|132111|minus.g3721.t2	S18_quant	4.07726	9.08116	77.2177	216
jgi|Phlrad1|132112|minus.g3722.t1	S13_quant	25.423	6.17995	719.856	876
jgi|Phlrad1|132112|minus.g3722.t1	S14_quant	20.0509	4.86597	731.035	876
jgi|Phlrad1|132112|minus.g3722.t1	S15_quant	7.56484	1.8441	703.795	876
jgi|Phlrad1|132112|minus.g3722.t1	S16_quant	9.2654	2.25657	703.869	876
jgi|Phlrad1|132112|minus.g3722.t1	S17_quant	9.42842	2.29056	729.572	876
jgi|Phlrad1|132112|minus.g3722.t1	S18_quant	10.5293	2.56505	705.981	876
jgi|Phlrad1|132113|minus.g3723.t1	S13_quant	386.437	94.7268	713.856	870
jgi|Phlrad1|132113|minus.g3723.t1	S14_quant	450.255	110.173	725.035	870
jgi|Phlrad1|132113|minus.g3723.t1	S15_quant	457.169	112.404	697.795	870
jgi|Phlrad1|132113|minus.g3723.t1	S16_quant	518.863	127.454	697.869	870
jgi|Phlrad1|132113|minus.g3723.t1	S17_quant	489.343	119.868	723.572	870
jgi|Phlrad1|132113|minus.g3723.t1	S18_quant	492.789	121.078	699.981	870
jgi|Phlrad1|132114|plus.g3764.t1	S13_quant	26.3753	14.4706	318.945	474
jgi|Phlrad1|132114|plus.g3764.t1	S14_quant	25.373	13.6518	329.728	474
jgi|Phlrad1|132114|plus.g3764.t1	S15_quant	22.4871	12.7294	303.08	474
jgi|Phlrad1|132114|plus.g3764.t1	S16_quant	28.8257	16.3206	302.774	474
jgi|Phlrad1|132114|plus.g3764.t1	S17_quant	15.9983	8.64067	328.17	474
jgi|Phlrad1|132114|plus.g3764.t1	S18_quant	20.9716	11.8302	304.879	474
jgi|Phlrad1|132115|plus.g3765.t1	S13_quant	49.7073	8.26143	1052.86	1209
jgi|Phlrad1|132115|plus.g3765.t1	S14_quant	43.4965	7.25225	1064.04	1209
jgi|Phlrad1|132115|plus.g3765.t1	S15_quant	35.3369	5.84746	1036.79	1209
jgi|Phlrad1|132115|plus.g3765.t1	S16_quant	42.2091	6.97843	1036.87	1209
jgi|Phlrad1|132115|plus.g3765.t1	S17_quant	47.9949	8.00587	1062.57	1209
jgi|Phlrad1|132115|plus.g3765.t1	S18_quant	52.429	8.67868	1038.98	1209
jgi|Phlrad1|132116|minus.g3725.t1	S13_quant	1395.86	80.0617	3050.86	3207
jgi|Phlrad1|132116|minus.g3725.t1	S14_quant	1534.16	88.8862	3062.04	3207
jgi|Phlrad1|132116|minus.g3725.t1	S15_quant	1536.62	86.8697	3034.79	3207
jgi|Phlrad1|132116|minus.g3725.t1	S16_quant	1705.86	96.3564	3034.87	3207
jgi|Phlrad1|132116|minus.g3725.t1	S17_quant	1492.55	86.4365	3060.57	3207
jgi|Phlrad1|132116|minus.g3725.t1	S18_quant	1682.97	95.3069	3036.98	3207
jgi|Phlrad1|132117|minus.g3726.t1	S13_quant	58.8372	12.0017	857.856	1014
jgi|Phlrad1|132117|minus.g3726.t1	S14_quant	52.5583	10.7295	869.035	1014
jgi|Phlrad1|132117|minus.g3726.t1	S15_quant	64.2489	13.0946	841.795	1014
jgi|Phlrad1|132117|minus.g3726.t1	S16_quant	156.482	31.8638	841.869	1014
jgi|Phlrad1|132117|minus.g3726.t1	S17_quant	144.926	29.6082	867.572	1014
jgi|Phlrad1|132117|minus.g3726.t1	S18_quant	178.259	36.3252	843.981	1014
jgi|Phlrad1|132118|minus.g3727.t1	S13_quant	86.2269	17.7751	848.856	1005
jgi|Phlrad1|132118|minus.g3727.t1	S14_quant	75.2128	15.5149	860.035	1005
jgi|Phlrad1|132118|minus.g3727.t1	S15_quant	104.94	21.6189	832.795	1005
jgi|Phlrad1|132118|minus.g3727.t1	S16_quant	77.2117	15.8921	832.869	1005
jgi|Phlrad1|132118|minus.g3727.t1	S17_quant	99.7542	20.5933	858.572	1005
jgi|Phlrad1|132118|minus.g3727.t1	S18_quant	93.3236	19.2223	834.981	1005
jgi|Phlrad1|132119|plus.g3769.t1	S13_quant	32.4619	51.8733	109.505	246
jgi|Phlrad1|132119|plus.g3769.t1	S14_quant	33.5286	49.7814	119.487	246
jgi|Phlrad1|132119|plus.g3769.t1	S15_quant	25.6995	44.5109	99.0582	246
jgi|Phlrad1|132119|plus.g3769.t1	S16_quant	13.3834	24.2682	94.5375	246
jgi|Phlrad1|132119|plus.g3769.t1	S17_quant	22.5859	34.1042	117.382	246
jgi|Phlrad1|132119|plus.g3769.t1	S18_quant	27.2631	47.5623	98.5829	246
jgi|Phlrad1|132120|plus.g3770.t1	S13_quant	12.1732	13.3958	159.017	306
jgi|Phlrad1|132120|plus.g3770.t1	S14_quant	9.06178	9.48126	169.559	306
jgi|Phlrad1|132120|plus.g3770.t1	S15_quant	13.9206	16.4263	145.395	306
jgi|Phlrad1|132120|plus.g3770.t1	S16_quant	10.2949	12.2856	143.649	306
jgi|Phlrad1|132120|plus.g3770.t1	S17_quant	15.0572	15.8466	168.415	306
jgi|Phlrad1|132120|plus.g3770.t1	S18_quant	6.29148	7.38319	146.554	306
jgi|Phlrad1|132121|plus.g3771.t1	S13_quant	15.2165	12.2727	216.96	369
jgi|Phlrad1|132121|plus.g3771.t1	S14_quant	24.4668	19.0332	228.055	369
jgi|Phlrad1|132121|plus.g3771.t1	S15_quant	18.2038	15.4624	201.984	369
jgi|Phlrad1|132121|plus.g3771.t1	S16_quant	13.3834	11.4062	201.141	369
jgi|Phlrad1|132121|plus.g3771.t1	S17_quant	18.8215	14.7526	226.131	369
jgi|Phlrad1|132121|plus.g3771.t1	S18_quant	20.9716	17.7031	203.738	369
jgi|Phlrad1|132122|plus.g3772.t1	S13_quant	914.005	42.0464	3803.86	3960
jgi|Phlrad1|132122|plus.g3772.t1	S14_quant	949.674	44.1622	3815.04	3960
jgi|Phlrad1|132122|plus.g3772.t1	S15_quant	1050.47	47.5804	3787.79	3960
jgi|Phlrad1|132122|plus.g3772.t1	S16_quant	805.06	36.4342	3787.87	3960
jgi|Phlrad1|132122|plus.g3772.t1	S17_quant	969.31	45.0508	3813.57	3960
jgi|Phlrad1|132122|plus.g3772.t1	S18_quant	913.313	41.445	3789.98	3960
jgi|Phlrad1|132123|minus.g3729.t1	S13_quant	168.396	26.3367	1118.86	1275
jgi|Phlrad1|132123|minus.g3729.t1	S14_quant	173.08	27.1725	1130.04	1275
jgi|Phlrad1|132123|minus.g3729.t1	S15_quant	154.197	23.9891	1102.79	1275
jgi|Phlrad1|132123|minus.g3729.t1	S16_quant	173.984	27.0434	1102.87	1275
jgi|Phlrad1|132123|minus.g3729.t1	S17_quant	160.924	25.2734	1128.57	1275
jgi|Phlrad1|132123|minus.g3729.t1	S18_quant	158.336	24.6441	1104.98	1275
jgi|Phlrad1|132124|minus.g3730.t1	S13_quant	0	0	884.856	1041
jgi|Phlrad1|132124|minus.g3730.t1	S14_quant	0	0	896.035	1041
jgi|Phlrad1|132124|minus.g3730.t1	S15_quant	0	0	868.795	1041
jgi|Phlrad1|132124|minus.g3730.t1	S16_quant	0	0	868.869	1041
jgi|Phlrad1|132124|minus.g3730.t1	S17_quant	0	0	894.572	1041
jgi|Phlrad1|132124|minus.g3730.t1	S18_quant	0	0	870.981	1041
jgi|Phlrad1|132125|minus.g3731.t1	S13_quant	23.332	5.19533	785.856	942
jgi|Phlrad1|132125|minus.g3731.t1	S14_quant	13.5927	3.02553	797.035	942
jgi|Phlrad1|132125|minus.g3731.t1	S15_quant	13.9206	3.10252	769.795	942
jgi|Phlrad1|132125|minus.g3731.t1	S16_quant	16.4718	3.66776	769.869	942
jgi|Phlrad1|132125|minus.g3731.t1	S17_quant	21.6448	4.8222	795.572	942
jgi|Phlrad1|132125|minus.g3731.t1	S18_quant	17.8259	3.97131	771.981	942
jgi|Phlrad1|132126|plus.g3776.t1	S13_quant	344.012	10.9473	5498.86	5655
jgi|Phlrad1|132126|plus.g3776.t1	S14_quant	387.475	12.4757	5510.04	5655
jgi|Phlrad1|132126|plus.g3776.t1	S15_quant	311.977	9.76229	5482.79	5655
jgi|Phlrad1|132126|plus.g3776.t1	S16_quant	397.463	12.427	5482.87	5655
jgi|Phlrad1|132126|plus.g3776.t1	S17_quant	320.527	10.3133	5508.57	5655
jgi|Phlrad1|132126|plus.g3776.t1	S18_quant	384.356	12.0517	5484.98	5655
jgi|Phlrad1|132127|minus.g3733.t1	S13_quant	19.2743	22.7041	148.552	294
jgi|Phlrad1|132127|minus.g3733.t1	S14_quant	29.9039	33.3177	159.231	294
jgi|Phlrad1|132127|minus.g3733.t1	S15_quant	18.2038	23.0497	135.497	294
jgi|Phlrad1|132127|minus.g3733.t1	S16_quant	21.6193	27.8033	133.297	294
jgi|Phlrad1|132127|minus.g3733.t1	S17_quant	26.3502	29.5825	157.877	294
jgi|Phlrad1|132127|minus.g3733.t1	S18_quant	15.7287	19.8549	136.243	294
jgi|Phlrad1|132128|minus.g3734.t1	S13_quant	18.1409	7.66497	414.145	570
jgi|Phlrad1|132128|minus.g3734.t1	S14_quant	29.3663	12.256	425.083	570
jgi|Phlrad1|132128|minus.g3734.t1	S15_quant	24.2591	10.458	397.978	570
jgi|Phlrad1|132128|minus.g3734.t1	S16_quant	26.6862	11.4917	398.089	570
jgi|Phlrad1|132128|minus.g3734.t1	S17_quant	18.2608	7.63883	423.705	570
jgi|Phlrad1|132128|minus.g3734.t1	S18_quant	22.493	9.66656	400.189	570
jgi|Phlrad1|132129|plus.g3777.t1	S13_quant	274.912	108.353	443.973	600
jgi|Phlrad1|132129|plus.g3777.t1	S14_quant	267.322	104.212	455.083	600
jgi|Phlrad1|132129|plus.g3777.t1	S15_quant	228.083	91.4504	427.898	600
jgi|Phlrad1|132129|plus.g3777.t1	S16_quant	249.136	99.7848	428.005	600
jgi|Phlrad1|132129|plus.g3777.t1	S17_quant	325.613	127.228	453.618	600
jgi|Phlrad1|132129|plus.g3777.t1	S18_quant	300.942	120.313	430.189	600
jgi|Phlrad1|132130|minus.g3737.t1	S13_quant	33.4763	3.86697	1514.86	1671
jgi|Phlrad1|132130|minus.g3737.t1	S14_quant	37.1533	4.31924	1526.04	1671
jgi|Phlrad1|132130|minus.g3737.t1	S15_quant	43.9034	5.0256	1498.79	1671
jgi|Phlrad1|132130|minus.g3737.t1	S16_quant	53.5334	6.12262	1498.87	1671
jgi|Phlrad1|132130|minus.g3737.t1	S17_quant	35.7609	4.1575	1524.57	1671
jgi|Phlrad1|132130|minus.g3737.t1	S18_quant	47.1861	5.40665	1500.98	1671
jgi|Phlrad1|132131|plus.g3779.t1	S13_quant	242.45	54.8234	773.856	930
jgi|Phlrad1|132131|plus.g3779.t1	S14_quant	215.67	48.7389	785.035	930
jgi|Phlrad1|132131|plus.g3779.t1	S15_quant	248.429	56.2448	757.795	930
jgi|Phlrad1|132131|plus.g3779.t1	S16_quant	243.989	55.189	757.869	930
jgi|Phlrad1|132131|plus.g3779.t1	S17_quant	255.973	57.9011	783.572	930
jgi|Phlrad1|132131|plus.g3779.t1	S18_quant	243.271	55.0524	759.981	930
jgi|Phlrad1|132132|minus.g3739.t1	S13_quant	100.429	18.195	965.856	1122
jgi|Phlrad1|132132|minus.g3739.t1	S14_quant	98.7734	17.9351	977.035	1122
jgi|Phlrad1|132132|minus.g3739.t1	S15_quant	97.4441	17.6018	949.795	1122
jgi|Phlrad1|132132|minus.g3739.t1	S16_quant	109.126	19.6943	949.869	1122
jgi|Phlrad1|132132|minus.g3739.t1	S17_quant	94.1077	17.0977	975.572	1122
jgi|Phlrad1|132132|minus.g3739.t1	S18_quant	99.6151	17.9964	951.981	1122
jgi|Phlrad1|132133|minus.g3740.t1	S13_quant	38.5485	4.76423	1415.86	1572
jgi|Phlrad1|132133|minus.g3740.t1	S14_quant	53.4645	6.64668	1427.04	1572
jgi|Phlrad1|132133|minus.g3740.t1	S15_quant	51.3991	6.29974	1399.79	1572
jgi|Phlrad1|132133|minus.g3740.t1	S16_quant	47.3565	5.7992	1399.87	1572
jgi|Phlrad1|132133|minus.g3740.t1	S17_quant	49.8771	6.20131	1425.57	1572
jgi|Phlrad1|132133|minus.g3740.t1	S18_quant	54.5262	6.68887	1401.98	1572
jgi|Phlrad1|132134|minus.g3741.t1	S13_quant	247.522	141.052	307.071	462
jgi|Phlrad1|132134|minus.g3741.t1	S14_quant	169.455	94.5599	317.923	462
jgi|Phlrad1|132134|minus.g3741.t1	S15_quant	276.27	162.687	291.348	462
jgi|Phlrad1|132134|minus.g3741.t1	S16_quant	79.2707	46.7054	290.952	462
jgi|Phlrad1|132134|minus.g3741.t1	S17_quant	303.027	169.79	316.33	462
jgi|Phlrad1|132134|minus.g3741.t1	S18_quant	87.0321	51.0757	293.059	462
jgi|Phlrad1|132135|plus.g3783.t1	S13_quant	214.046	29.9436	1250.86	1407
jgi|Phlrad1|132135|plus.g3783.t1	S14_quant	215.67	30.3175	1262.04	1407
jgi|Phlrad1|132135|plus.g3783.t1	S15_quant	212.021	29.4589	1234.79	1407
jgi|Phlrad1|132135|plus.g3783.t1	S16_quant	110.155	15.2919	1234.87	1407
jgi|Phlrad1|132135|plus.g3783.t1	S17_quant	152.455	21.436	1260.57	1407
jgi|Phlrad1|132135|plus.g3783.t1	S18_quant	141.558	19.6817	1236.98	1407
jgi|Phlrad1|132136|plus.g3784.t1	S13_quant	1127.04	260.917	755.856	912
jgi|Phlrad1|132136|plus.g3784.t1	S14_quant	1068.38	247.108	767.035	912
jgi|Phlrad1|132136|plus.g3784.t1	S15_quant	1066.53	247.34	739.795	912
jgi|Phlrad1|132136|plus.g3784.t1	S16_quant	1135.53	263.099	739.869	912
jgi|Phlrad1|132136|plus.g3784.t1	S17_quant	1134.94	262.759	765.572	912
jgi|Phlrad1|132136|plus.g3784.t1	S18_quant	1116.74	258.85	741.981	912
jgi|Phlrad1|132137|plus.g3785.t1	S13_quant	9.12991	5.05509	316.04	471
jgi|Phlrad1|132137|plus.g3785.t1	S14_quant	13.5927	7.37913	326.794	471
jgi|Phlrad1|132137|plus.g3785.t1	S15_quant	13.9206	7.95808	300.111	471
jgi|Phlrad1|132137|plus.g3785.t1	S16_quant	6.17693	3.53192	299.804	471
jgi|Phlrad1|132137|plus.g3785.t1	S17_quant	9.41077	5.12964	325.17	471
jgi|Phlrad1|132137|plus.g3785.t1	S18_quant	12.583	7.16723	301.94	471
jgi|Phlrad1|132138|plus.g3786.t1	S13_quant	224.19	26.7992	1463.86	1620
jgi|Phlrad1|132138|plus.g3786.t1	S14_quant	267.322	32.1519	1475.04	1620
jgi|Phlrad1|132138|plus.g3786.t1	S15_quant	246.287	29.1855	1447.79	1620
jgi|Phlrad1|132138|plus.g3786.t1	S16_quant	265.608	31.4477	1447.87	1620
jgi|Phlrad1|132138|plus.g3786.t1	S17_quant	259.737	31.2417	1473.57	1620
jgi|Phlrad1|132138|plus.g3786.t1	S18_quant	333.448	39.5509	1449.98	1620
jgi|Phlrad1|132139|minus.g3746.t1	S13_quant	61.8805	18.4179	587.919	744
jgi|Phlrad1|132139|minus.g3746.t1	S14_quant	71.588	21.2013	599.035	744
jgi|Phlrad1|132139|minus.g3746.t1	S15_quant	54.6115	16.3861	571.795	744
jgi|Phlrad1|132139|minus.g3746.t1	S16_quant	102.949	30.8604	571.869	744
jgi|Phlrad1|132139|minus.g3746.t1	S17_quant	99.7542	29.5878	597.572	744
jgi|Phlrad1|132139|minus.g3746.t1	S18_quant	85.9835	25.7637	573.981	744
jgi|Phlrad1|132140|plus.g3788.t1	S13_quant	84.198	6.7373	2186.86	2343
jgi|Phlrad1|132140|plus.g3788.t1	S14_quant	81.556	6.58257	2198.04	2343
jgi|Phlrad1|132140|plus.g3788.t1	S15_quant	67.4613	5.33173	2170.79	2343
jgi|Phlrad1|132140|plus.g3788.t1	S16_quant	100.89	7.96692	2170.87	2343
jgi|Phlrad1|132140|plus.g3788.t1	S17_quant	57.4057	4.63213	2196.57	2343
jgi|Phlrad1|132140|plus.g3788.t1	S18_quant	79.6921	6.30738	2172.98	2343
jgi|Phlrad1|132141|minus.g3748.t1	S13_quant	427.077	66.085	1130.86	1287
jgi|Phlrad1|132141|minus.g3748.t1	S14_quant	424.091	65.8801	1142.04	1287
jgi|Phlrad1|132141|minus.g3748.t1	S15_quant	431.538	66.4135	1114.79	1287
jgi|Phlrad1|132141|minus.g3748.t1	S16_quant	382.97	58.8867	1114.87	1287
jgi|Phlrad1|132141|minus.g3748.t1	S17_quant	465.833	72.3901	1140.57	1287
jgi|Phlrad1|132141|minus.g3748.t1	S18_quant	448.792	69.1018	1116.98	1287
jgi|Phlrad1|132142|plus.g3790.t1	S13_quant	62.8949	5.12407	2147.86	2304
jgi|Phlrad1|132142|plus.g3790.t1	S14_quant	57.9954	4.76549	2159.04	2304
jgi|Phlrad1|132142|plus.g3790.t1	S15_quant	62.1072	4.99837	2131.79	2304
jgi|Phlrad1|132142|plus.g3790.t1	S16_quant	43.2385	3.47686	2131.87	2304
jgi|Phlrad1|132142|plus.g3790.t1	S17_quant	53.6414	4.40663	2157.57	2304
jgi|Phlrad1|132142|plus.g3790.t1	S18_quant	55.5747	4.47895	2133.98	2304
jgi|Phlrad1|132143|minus.g3750.t1	S13_quant	97.3857	10.1808	1673.86	1830
jgi|Phlrad1|132143|minus.g3750.t1	S14_quant	99.6796	10.4947	1685.04	1830
jgi|Phlrad1|132143|minus.g3750.t1	S15_quant	99.5857	10.3062	1657.79	1830
jgi|Phlrad1|132143|minus.g3750.t1	S16_quant	109.126	11.2838	1657.87	1830
jgi|Phlrad1|132143|minus.g3750.t1	S17_quant	69.6397	7.33157	1683.57	1830
jgi|Phlrad1|132143|minus.g3750.t1	S18_quant	90.1779	9.343	1659.98	1830
jgi|Phlrad1|132144|plus.g3792.t1	S13_quant	54.7795	22.341	429.061	585
jgi|Phlrad1|132144|plus.g3792.t1	S14_quant	46.2151	18.6305	440.083	585
jgi|Phlrad1|132144|plus.g3792.t1	S15_quant	52.4699	21.8022	412.898	585
jgi|Phlrad1|132144|plus.g3792.t1	S16_quant	20.5898	8.54445	413.089	585
jgi|Phlrad1|132144|plus.g3792.t1	S17_quant	38.5842	15.5902	438.662	585
jgi|Phlrad1|132144|plus.g3792.t1	S18_quant	29.3602	12.162	415.189	585
jgi|Phlrad1|132145|minus.g3752.t1	S13_quant	1896.99	90.4033	3671.86	3828
jgi|Phlrad1|132145|minus.g3752.t1	S14_quant	2041.62	98.3429	3683.04	3828
jgi|Phlrad1|132145|minus.g3752.t1	S15_quant	2124.5	99.7024	3655.79	3828
jgi|Phlrad1|132145|minus.g3752.t1	S16_quant	2022.95	94.8571	3655.87	3828
jgi|Phlrad1|132145|minus.g3752.t1	S17_quant	2072.25	99.7656	3681.57	3828
jgi|Phlrad1|132145|minus.g3752.t1	S18_quant	2282.76	107.327	3657.98	3828
jgi|Phlrad1|132146|minus.g3753.t1	S13_quant	1126.02	56.283	3500.86	3657
jgi|Phlrad1|132146|minus.g3753.t1	S14_quant	1046.64	52.8702	3512.04	3657
jgi|Phlrad1|132146|minus.g3753.t1	S15_quant	1180.04	58.0966	3484.79	3657
jgi|Phlrad1|132146|minus.g3753.t1	S16_quant	980.074	48.2112	3484.87	3657
jgi|Phlrad1|132146|minus.g3753.t1	S17_quant	1149.06	58.0142	3510.57	3657
jgi|Phlrad1|132146|minus.g3753.t1	S18_quant	933.236	46.029	3486.98	3657
jgi|Phlrad1|132147|minus.g3754.t1	S13_quant	6.08661	9.72625	109.505	246
jgi|Phlrad1|132147|minus.g3754.t1	S14_quant	5.43707	8.07266	119.487	246
jgi|Phlrad1|132147|minus.g3754.t1	S15_quant	9.63733	16.6916	99.0582	246
jgi|Phlrad1|132147|minus.g3754.t1	S16_quant	3.08847	5.60035	94.5375	246
jgi|Phlrad1|132147|minus.g3754.t1	S17_quant	11.2929	17.0521	117.382	246
jgi|Phlrad1|132147|minus.g3754.t1	S18_quant	9.43722	16.4639	98.5829	246
jgi|Phlrad1|132148|minus.g3755.t1	S13_quant	226.219	55.4527	713.856	870
jgi|Phlrad1|132148|minus.g3755.t1	S14_quant	254.636	62.3067	725.035	870
jgi|Phlrad1|132148|minus.g3755.t1	S15_quant	224.871	55.2889	697.795	870
jgi|Phlrad1|132148|minus.g3755.t1	S16_quant	297.522	73.0839	697.869	870
jgi|Phlrad1|132148|minus.g3755.t1	S17_quant	244.68	59.9361	723.572	870
jgi|Phlrad1|132148|minus.g3755.t1	S18_quant	278.922	68.5309	699.981	870
jgi|Phlrad1|132149|minus.g3756.t1	S13_quant	194.771	23.0933	1475.86	1632
jgi|Phlrad1|132149|minus.g3756.t1	S14_quant	204.796	24.4329	1487.04	1632
jgi|Phlrad1|132149|minus.g3756.t1	S15_quant	215.234	25.2959	1459.79	1632
jgi|Phlrad1|132149|minus.g3756.t1	S16_quant	201.78	23.6941	1459.87	1632
jgi|Phlrad1|132149|minus.g3756.t1	S17_quant	200.449	23.9157	1485.57	1632
jgi|Phlrad1|132149|minus.g3756.t1	S18_quant	202.376	23.8071	1461.98	1632
jgi|Phlrad1|132150|minus.g3757.t1	S13_quant	1150.37	87.7174	2294.86	2451
jgi|Phlrad1|132150|minus.g3757.t1	S14_quant	1011.29	77.8011	2306.04	2451
jgi|Phlrad1|132150|minus.g3757.t1	S15_quant	1084.73	81.6677	2278.79	2451
jgi|Phlrad1|132150|minus.g3757.t1	S16_quant	877.125	65.9809	2278.87	2451
jgi|Phlrad1|132150|minus.g3757.t1	S17_quant	997.542	76.7207	2304.57	2451
jgi|Phlrad1|132150|minus.g3757.t1	S18_quant	816.844	61.5895	2280.98	2451
jgi|Phlrad1|132151|minus.g3758.t1	S13_quant	1283.26	146.207	1535.86	1692
jgi|Phlrad1|132151|minus.g3758.t1	S14_quant	1314.86	150.784	1547.04	1692
jgi|Phlrad1|132151|minus.g3758.t1	S15_quant	1296.76	146.388	1519.79	1692
jgi|Phlrad1|132151|minus.g3758.t1	S16_quant	1313.63	148.164	1519.87	1692
jgi|Phlrad1|132151|minus.g3758.t1	S17_quant	1335.39	153.14	1545.57	1692
jgi|Phlrad1|132151|minus.g3758.t1	S18_quant	1362.11	153.919	1521.98	1692
jgi|Phlrad1|132152|plus.g3799.t1	S13_quant	1272.1	73.6147	3023.86	3180
jgi|Phlrad1|132152|plus.g3799.t1	S14_quant	1273.18	74.4218	3035.04	3180
jgi|Phlrad1|132152|plus.g3799.t1	S15_quant	1401.7	79.9535	3007.79	3180
jgi|Phlrad1|132152|plus.g3799.t1	S16_quant	1235.39	70.4077	3007.87	3180
jgi|Phlrad1|132152|plus.g3799.t1	S17_quant	1394.68	81.4874	3033.57	3180
jgi|Phlrad1|132152|plus.g3799.t1	S18_quant	1275.07	72.8553	3009.98	3180
jgi|Phlrad1|132153|minus.g3760.t1	S13_quant	19.2743	8.7762	384.305	540
jgi|Phlrad1|132153|minus.g3760.t1	S14_quant	15.405	6.91177	395.41	540
jgi|Phlrad1|132153|minus.g3760.t1	S15_quant	21.4163	9.97688	368.283	540
jgi|Phlrad1|132153|minus.g3760.t1	S16_quant	9.2654	4.31368	368.207	540
jgi|Phlrad1|132153|minus.g3760.t1	S17_quant	9.41077	4.23578	393.788	540
jgi|Phlrad1|132153|minus.g3760.t1	S18_quant	13.6315	6.33104	370.305	540
jgi|Phlrad1|132154|minus.g3761.t1	S13_quant	5.07217	10.5757	83.9243	210
jgi|Phlrad1|132154|minus.g3761.t1	S14_quant	0	0	92.5458	210
jgi|Phlrad1|132154|minus.g3761.t1	S15_quant	6.42489	14.6392	75.2976	210
jgi|Phlrad1|132154|minus.g3761.t1	S16_quant	6.17693	15.4674	68.4591	210
jgi|Phlrad1|132154|minus.g3761.t1	S17_quant	1.88215	3.6901	90.4043	210
jgi|Phlrad1|132154|minus.g3761.t1	S18_quant	6.29148	14.7391	73.4126	210
jgi|Phlrad1|132155|plus.g3800.t1	S13_quant	155.208	31.9953	848.856	1005
jgi|Phlrad1|132155|plus.g3800.t1	S14_quant	124.146	25.609	860.035	1005
jgi|Phlrad1|132155|plus.g3800.t1	S15_quant	133.852	27.5752	832.795	1005
jgi|Phlrad1|132155|plus.g3800.t1	S16_quant	219.281	45.1337	832.869	1005
jgi|Phlrad1|132155|plus.g3800.t1	S17_quant	160.924	33.2213	858.572	1005
jgi|Phlrad1|132155|plus.g3800.t1	S18_quant	173.016	35.6368	834.981	1005
jgi|Phlrad1|132156|minus.g3762.t1	S13_quant	20.2887	36.0917	98.3673	231
jgi|Phlrad1|132156|minus.g3762.t1	S14_quant	26.2792	43.2809	107.718	231
jgi|Phlrad1|132156|minus.g3762.t1	S15_quant	42.8326	82.9447	88.5967	231
jgi|Phlrad1|132156|minus.g3762.t1	S16_quant	27.7962	57.3737	83.0517	231
jgi|Phlrad1|132156|minus.g3762.t1	S17_quant	39.5252	66.1337	105.931	231
jgi|Phlrad1|132156|minus.g3762.t1	S18_quant	34.6031	67.8114	87.7612	231
jgi|Phlrad1|132157|minus.g3763.t1	S13_quant	64.9238	30.5117	372.342	528
jgi|Phlrad1|132157|minus.g3763.t1	S14_quant	76.1189	35.2176	383.448	528
jgi|Phlrad1|132157|minus.g3763.t1	S15_quant	84.5943	40.7277	356.355	528
jgi|Phlrad1|132157|minus.g3763.t1	S16_quant	74.1232	35.6611	356.316	528
jgi|Phlrad1|132157|minus.g3763.t1	S17_quant	113.87	52.8585	381.827	528
jgi|Phlrad1|132157|minus.g3763.t1	S18_quant	77.5949	37.2337	358.415	528
jgi|Phlrad1|132158|plus.g3801.t1	S13_quant	209.988	11.8347	3104.86	3261
jgi|Phlrad1|132158|plus.g3801.t1	S14_quant	195.734	11.1439	3116.04	3261
jgi|Phlrad1|132158|plus.g3801.t1	S15_quant	187.392	10.4087	3088.79	3261
jgi|Phlrad1|132158|plus.g3801.t1	S16_quant	233.694	12.9695	3088.87	3261
jgi|Phlrad1|132158|plus.g3801.t1	S17_quant	186.333	10.6039	3114.57	3261
jgi|Phlrad1|132158|plus.g3801.t1	S18_quant	209.716	11.6688	3090.98	3261
jgi|Phlrad1|132159|minus.g3765.t1	S13_quant	406.788	29.4769	2414.86	2571
jgi|Phlrad1|132159|minus.g3765.t1	S14_quant	409.592	29.9522	2426.04	2571
jgi|Phlrad1|132159|minus.g3765.t1	S15_quant	428.326	30.6346	2398.79	2571
jgi|Phlrad1|132159|minus.g3765.t1	S16_quant	413.855	29.5745	2398.87	2571
jgi|Phlrad1|132159|minus.g3765.t1	S17_quant	410.31	29.995	2424.57	2571
jgi|Phlrad1|132159|minus.g3765.t1	S18_quant	395.315	28.3168	2400.98	2571
jgi|Phlrad1|132160|minus.g3766.t1	S13_quant	58.8372	9.12857	1127.86	1284
jgi|Phlrad1|132160|minus.g3766.t1	S14_quant	56.183	8.75069	1139.04	1284
jgi|Phlrad1|132160|minus.g3766.t1	S15_quant	92.09	14.2108	1111.79	1284
jgi|Phlrad1|132160|minus.g3766.t1	S16_quant	68.9758	10.6346	1111.87	1284
jgi|Phlrad1|132160|minus.g3766.t1	S17_quant	59.2879	9.23758	1137.57	1284
jgi|Phlrad1|132160|minus.g3766.t1	S18_quant	73.4006	11.3321	1113.98	1284
jgi|Phlrad1|132161|minus.g3767.t1	S13_quant	254.623	64.8688	686.856	843
jgi|Phlrad1|132161|minus.g3767.t1	S14_quant	279.103	70.9351	698.035	843
jgi|Phlrad1|132161|minus.g3767.t1	S15_quant	261.279	66.8261	670.795	843
jgi|Phlrad1|132161|minus.g3767.t1	S16_quant	389.147	99.4379	670.869	843
jgi|Phlrad1|132161|minus.g3767.t1	S17_quant	289.852	73.7533	696.572	843
jgi|Phlrad1|132161|minus.g3767.t1	S18_quant	313.525	80.1234	672.981	843
jgi|Phlrad1|132162|plus.g3805.t1	S13_quant	0	0	1025.86	1182
jgi|Phlrad1|132162|plus.g3805.t1	S14_quant	0	0	1037.04	1182
jgi|Phlrad1|132162|plus.g3805.t1	S15_quant	0	0	1009.79	1182
jgi|Phlrad1|132162|plus.g3805.t1	S16_quant	0	0	1009.87	1182
jgi|Phlrad1|132162|plus.g3805.t1	S17_quant	0	0	1035.57	1182
jgi|Phlrad1|132162|plus.g3805.t1	S18_quant	0	0	1011.98	1182
jgi|Phlrad1|132163|minus.g3769.t1	S13_quant	0	0	1319.86	1476
jgi|Phlrad1|132163|minus.g3769.t1	S14_quant	0	0	1331.04	1476
jgi|Phlrad1|132163|minus.g3769.t1	S15_quant	0	0	1303.79	1476
jgi|Phlrad1|132163|minus.g3769.t1	S16_quant	0	0	1303.87	1476
jgi|Phlrad1|132163|minus.g3769.t1	S17_quant	0	0	1329.57	1476
jgi|Phlrad1|132163|minus.g3769.t1	S18_quant	0	0	1305.98	1476
jgi|Phlrad1|132164|plus.g3807.t1	S13_quant	0	0	1169.86	1326
jgi|Phlrad1|132164|plus.g3807.t1	S14_quant	0	0	1181.04	1326
jgi|Phlrad1|132164|plus.g3807.t1	S15_quant	0	0	1153.79	1326
jgi|Phlrad1|132164|plus.g3807.t1	S16_quant	0	0	1153.87	1326
jgi|Phlrad1|132164|plus.g3807.t1	S17_quant	0	0	1179.57	1326
jgi|Phlrad1|132164|plus.g3807.t1	S18_quant	0	0	1155.98	1326
jgi|Phlrad1|132165|plus.g3808.t1	S13_quant	0	0	441.061	597
jgi|Phlrad1|132165|plus.g3808.t1	S14_quant	0	0	452.083	597
jgi|Phlrad1|132165|plus.g3808.t1	S15_quant	0	0	424.898	597
jgi|Phlrad1|132165|plus.g3808.t1	S16_quant	0	0	425.005	597
jgi|Phlrad1|132165|plus.g3808.t1	S17_quant	0	0	450.618	597
jgi|Phlrad1|132165|plus.g3808.t1	S18_quant	0	0	427.189	597
jgi|Phlrad1|132166|minus.g3772.t1	S13_quant	0	0	1364.86	1521
jgi|Phlrad1|132166|minus.g3772.t1	S14_quant	0	0	1376.04	1521
jgi|Phlrad1|132166|minus.g3772.t1	S15_quant	0	0	1348.79	1521
jgi|Phlrad1|132166|minus.g3772.t1	S16_quant	0	0	1348.87	1521
jgi|Phlrad1|132166|minus.g3772.t1	S17_quant	0	0	1374.57	1521
jgi|Phlrad1|132166|minus.g3772.t1	S18_quant	0	0	1350.98	1521
jgi|Phlrad1|132167|plus.g3810.t1	S13_quant	1155.44	92.4553	2186.86	2343
jgi|Phlrad1|132167|plus.g3810.t1	S14_quant	1131.82	91.3514	2198.04	2343
jgi|Phlrad1|132167|plus.g3810.t1	S15_quant	1111.51	87.8465	2170.79	2343
jgi|Phlrad1|132167|plus.g3810.t1	S16_quant	1356.87	107.147	2170.87	2343
jgi|Phlrad1|132167|plus.g3810.t1	S17_quant	1274.22	102.818	2196.57	2343
jgi|Phlrad1|132167|plus.g3810.t1	S18_quant	1189.09	94.1127	2172.98	2343
jgi|Phlrad1|132168|minus.g3774.t1	S13_quant	37.5341	5.13982	1277.86	1434
jgi|Phlrad1|132168|minus.g3774.t1	S14_quant	60.7139	8.35598	1289.04	1434
jgi|Phlrad1|132168|minus.g3774.t1	S15_quant	51.3991	6.98873	1261.79	1434
jgi|Phlrad1|132168|minus.g3774.t1	S16_quant	50.445	6.85298	1261.87	1434
jgi|Phlrad1|132168|minus.g3774.t1	S17_quant	62.1111	8.55006	1287.57	1434
jgi|Phlrad1|132168|minus.g3774.t1	S18_quant	54.5262	7.41915	1263.98	1434
jgi|Phlrad1|132169|minus.g3775.t1	S13_quant	2.02887	2.3899	148.552	294
jgi|Phlrad1|132169|minus.g3775.t1	S14_quant	5.43707	6.05776	159.231	294
jgi|Phlrad1|132169|minus.g3775.t1	S15_quant	3.21244	4.0676	135.497	294
jgi|Phlrad1|132169|minus.g3775.t1	S16_quant	5.14745	6.61984	133.297	294
jgi|Phlrad1|132169|minus.g3775.t1	S17_quant	1.88215	2.11304	157.877	294
jgi|Phlrad1|132169|minus.g3775.t1	S18_quant	2.09716	2.64732	136.243	294
jgi|Phlrad1|132170|plus.g3812.t1	S13_quant	74.0537	10.2612	1262.86	1419
jgi|Phlrad1|132170|plus.g3812.t1	S14_quant	54.3707	7.57107	1274.04	1419
jgi|Phlrad1|132170|plus.g3812.t1	S15_quant	59.9656	8.25162	1246.79	1419
jgi|Phlrad1|132170|plus.g3812.t1	S16_quant	56.6219	7.78466	1246.87	1419
jgi|Phlrad1|132170|plus.g3812.t1	S17_quant	60.229	8.38869	1272.57	1419
jgi|Phlrad1|132170|plus.g3812.t1	S18_quant	72.352	9.96287	1248.98	1419
jgi|Phlrad1|132171|minus.g3777.t1	S13_quant	586.343	23.047	4451.86	4608
jgi|Phlrad1|132171|minus.g3777.t1	S14_quant	691.414	27.4841	4463.04	4608
jgi|Phlrad1|132171|minus.g3777.t1	S15_quant	711.021	27.5006	4435.79	4608
jgi|Phlrad1|132171|minus.g3777.t1	S16_quant	703.141	27.1731	4435.87	4608
jgi|Phlrad1|132171|minus.g3777.t1	S17_quant	686.045	27.2544	4461.57	4608
jgi|Phlrad1|132171|minus.g3777.t1	S18_quant	718.277	27.8353	4437.98	4608
jgi|Phlrad1|132172|minus.g3778.t1	S13_quant	881.543	238.105	647.856	804
jgi|Phlrad1|132172|minus.g3778.t1	S14_quant	828.246	222.959	659.035	804
jgi|Phlrad1|132172|minus.g3778.t1	S15_quant	794.544	215.761	631.795	804
jgi|Phlrad1|132172|minus.g3778.t1	S16_quant	760.792	206.403	631.869	804
jgi|Phlrad1|132172|minus.g3778.t1	S17_quant	836.618	225.504	657.572	804
jgi|Phlrad1|132172|minus.g3778.t1	S18_quant	728.763	197.697	633.981	804
jgi|Phlrad1|132173|plus.g3815.t1	S13_quant	224.19	33.2782	1178.86	1335
jgi|Phlrad1|132173|plus.g3815.t1	S14_quant	218.389	32.557	1190.04	1335
jgi|Phlrad1|132173|plus.g3815.t1	S15_quant	187.392	27.6491	1162.79	1335
jgi|Phlrad1|132173|plus.g3815.t1	S16_quant	256.343	37.7891	1162.87	1335
jgi|Phlrad1|132173|plus.g3815.t1	S17_quant	225.859	33.6808	1188.57	1335
jgi|Phlrad1|132173|plus.g3815.t1	S18_quant	236.979	34.9849	1164.98	1335
jgi|Phlrad1|132174|minus.g3780.t1	S13_quant	122.747	22.101	971.856	1128
jgi|Phlrad1|132174|minus.g3780.t1	S14_quant	113.272	20.4422	983.035	1128
jgi|Phlrad1|132174|minus.g3780.t1	S15_quant	106.011	19.029	955.795	1128
jgi|Phlrad1|132174|minus.g3780.t1	S16_quant	108.096	19.386	955.869	1128
jgi|Phlrad1|132174|minus.g3780.t1	S17_quant	136.456	24.6401	981.572	1128
jgi|Phlrad1|132174|minus.g3780.t1	S18_quant	91.2264	16.3777	957.981	1128
jgi|Phlrad1|132175|plus.g3817.t1	S13_quant	90.2847	18.5461	851.856	1008
jgi|Phlrad1|132175|plus.g3817.t1	S14_quant	77.9313	16.0198	863.035	1008
jgi|Phlrad1|132175|plus.g3817.t1	S15_quant	81.3819	16.7055	835.795	1008
jgi|Phlrad1|132175|plus.g3817.t1	S16_quant	4532.84	929.626	835.869	1008
jgi|Phlrad1|132175|plus.g3817.t1	S17_quant	14453.1	2973.31	861.572	1008
jgi|Phlrad1|132175|plus.g3817.t1	S18_quant	10113.6	2075.67	837.981	1008
jgi|Phlrad1|132176|plus.g3818.t1	S13_quant	521.419	76.6182	1190.86	1347
jgi|Phlrad1|132176|plus.g3818.t1	S14_quant	515.615	76.0996	1202.04	1347
jgi|Phlrad1|132176|plus.g3818.t1	S15_quant	557.894	81.4745	1174.79	1347
jgi|Phlrad1|132176|plus.g3818.t1	S16_quant	556.954	81.2654	1174.87	1347
jgi|Phlrad1|132176|plus.g3818.t1	S17_quant	601.348	88.7788	1200.57	1347
jgi|Phlrad1|132176|plus.g3818.t1	S18_quant	637.537	93.1591	1176.98	1347
jgi|Phlrad1|132177|plus.g3819.t1	S13_quant	207.959	31.1864	1166.86	1323
jgi|Phlrad1|132177|plus.g3819.t1	S14_quant	235.606	35.4816	1178.04	1323
jgi|Phlrad1|132177|plus.g3819.t1	S15_quant	187.392	27.9374	1150.79	1323
jgi|Phlrad1|132177|plus.g3819.t1	S16_quant	224.429	33.4294	1150.87	1323
jgi|Phlrad1|132177|plus.g3819.t1	S17_quant	212.683	32.0396	1176.57	1323
jgi|Phlrad1|132177|plus.g3819.t1	S18_quant	216.007	32.2208	1152.98	1323
jgi|Phlrad1|132178|minus.g3784.t1	S13_quant	68.9815	17.3467	695.856	852
jgi|Phlrad1|132178|minus.g3784.t1	S14_quant	87.8992	22.0556	707.035	852
jgi|Phlrad1|132178|minus.g3784.t1	S15_quant	79.2402	19.9986	679.795	852
jgi|Phlrad1|132178|minus.g3784.t1	S16_quant	75.1527	18.9494	679.869	852
jgi|Phlrad1|132178|minus.g3784.t1	S17_quant	104.46	26.2409	705.572	852
jgi|Phlrad1|132178|minus.g3784.t1	S18_quant	99.6151	25.1213	681.981	852
jgi|Phlrad1|132179|plus.g3821.t1	S13_quant	71.0104	13.672	908.856	1065
jgi|Phlrad1|132179|plus.g3821.t1	S14_quant	56.183	10.8336	920.035	1065
jgi|Phlrad1|132179|plus.g3821.t1	S15_quant	66.3905	12.7581	892.795	1065
jgi|Phlrad1|132179|plus.g3821.t1	S16_quant	147.217	28.2648	892.869	1065
jgi|Phlrad1|132179|plus.g3821.t1	S17_quant	106.342	20.5193	918.572	1065
jgi|Phlrad1|132179|plus.g3821.t1	S18_quant	130.024	24.9861	894.981	1065
jgi|Phlrad1|132180|minus.g3786.t1	S13_quant	131.876	21.3701	1079.86	1236
jgi|Phlrad1|132180|minus.g3786.t1	S14_quant	147.707	24.018	1091.04	1236
jgi|Phlrad1|132180|minus.g3786.t1	S15_quant	132.781	21.4146	1063.79	1236
jgi|Phlrad1|132180|minus.g3786.t1	S16_quant	150.305	24.2194	1063.87	1236
jgi|Phlrad1|132180|minus.g3786.t1	S17_quant	143.044	23.2694	1089.57	1236
jgi|Phlrad1|132180|minus.g3786.t1	S18_quant	150.995	24.3615	1065.98	1236
jgi|Phlrad1|132181|plus.g3823.t1	S13_quant	448.38	28.003	2801.86	2958
jgi|Phlrad1|132181|plus.g3823.t1	S14_quant	510.178	32.1752	2813.04	2958
jgi|Phlrad1|132181|plus.g3823.t1	S15_quant	520.416	32.0504	2785.79	2958
jgi|Phlrad1|132181|plus.g3823.t1	S16_quant	438.562	26.9865	2785.87	2958
jgi|Phlrad1|132181|plus.g3823.t1	S17_quant	509.123	32.0956	2811.57	2958
jgi|Phlrad1|132181|plus.g3823.t1	S18_quant	484.444	29.8843	2787.98	2958
jgi|Phlrad1|132182|minus.g3788.t1	S13_quant	36.5196	11.7705	542.919	699
jgi|Phlrad1|132182|minus.g3788.t1	S14_quant	35.3409	11.3166	554.035	699
jgi|Phlrad1|132182|minus.g3788.t1	S15_quant	32.1244	10.4612	526.85	699
jgi|Phlrad1|132182|minus.g3788.t1	S16_quant	40.1501	13.0635	526.869	699
jgi|Phlrad1|132182|minus.g3788.t1	S17_quant	31.9966	10.2633	552.572	699
jgi|Phlrad1|132182|minus.g3788.t1	S18_quant	39.846	12.9536	529.036	699
jgi|Phlrad1|132183|plus.g3825.t1	S13_quant	173.468	35.7594	848.856	1005
jgi|Phlrad1|132183|plus.g3825.t1	S14_quant	161.3	33.273	860.035	1005
jgi|Phlrad1|132183|plus.g3825.t1	S15_quant	140.277	28.8988	832.795	1005
jgi|Phlrad1|132183|plus.g3825.t1	S16_quant	153.394	31.5724	832.869	1005
jgi|Phlrad1|132183|plus.g3825.t1	S17_quant	133.633	27.5872	858.572	1005
jgi|Phlrad1|132183|plus.g3825.t1	S18_quant	142.607	29.3734	834.981	1005
jgi|Phlrad1|132184|plus.g3826.t1	S13_quant	167.382	22.9208	1277.86	1434
jgi|Phlrad1|132184|plus.g3826.t1	S14_quant	152.238	20.9523	1289.04	1434
jgi|Phlrad1|132184|plus.g3826.t1	S15_quant	160.622	21.8398	1261.79	1434
jgi|Phlrad1|132184|plus.g3826.t1	S16_quant	144.128	19.58	1261.87	1434
jgi|Phlrad1|132184|plus.g3826.t1	S17_quant	117.635	16.1933	1287.57	1434
jgi|Phlrad1|132184|plus.g3826.t1	S18_quant	99.6151	13.5542	1263.98	1434
jgi|Phlrad1|132185|plus.g3827.t1	S13_quant	59.8516	11.0494	947.856	1104
jgi|Phlrad1|132185|plus.g3827.t1	S14_quant	79.7436	14.7515	959.035	1104
jgi|Phlrad1|132185|plus.g3827.t1	S15_quant	67.4613	12.4213	931.795	1104
jgi|Phlrad1|132185|plus.g3827.t1	S16_quant	50.445	9.27981	931.869	1104
jgi|Phlrad1|132185|plus.g3827.t1	S17_quant	58.3468	10.7998	957.572	1104
jgi|Phlrad1|132185|plus.g3827.t1	S18_quant	62.9148	11.5852	933.981	1104
jgi|Phlrad1|132186|minus.g3792.t1	S13_quant	250.565	170.297	257.465	411
jgi|Phlrad1|132186|minus.g3792.t1	S14_quant	378.782	250.592	268.162	411
jgi|Phlrad1|132186|minus.g3792.t1	S15_quant	308.394	218.785	241.835	411
jgi|Phlrad1|132186|minus.g3792.t1	S16_quant	259.431	184.464	241.094	411
jgi|Phlrad1|132186|minus.g3792.t1	S17_quant	266.325	177.156	266.457	411
jgi|Phlrad1|132186|minus.g3792.t1	S18_quant	224.396	158.45	243.564	411
jgi|Phlrad1|132187|minus.g3793.t1	S13_quant	36.5196	8.87738	719.856	876
jgi|Phlrad1|132187|minus.g3793.t1	S14_quant	32.6224	7.91684	731.035	876
jgi|Phlrad1|132187|minus.g3793.t1	S15_quant	24.6287	6.00382	703.795	876
jgi|Phlrad1|132187|minus.g3793.t1	S16_quant	37.0616	9.02628	703.869	876
jgi|Phlrad1|132187|minus.g3793.t1	S17_quant	25.4091	6.17294	729.572	876
jgi|Phlrad1|132187|minus.g3793.t1	S18_quant	28.3117	6.89703	705.981	876
jgi|Phlrad1|132188|plus.g3829.t1	S13_quant	1496.29	66.4738	3938.86	4095
jgi|Phlrad1|132188|plus.g3829.t1	S14_quant	1612.09	72.404	3950.04	4095
jgi|Phlrad1|132188|plus.g3829.t1	S15_quant	1732.58	75.7755	3922.79	4095
jgi|Phlrad1|132188|plus.g3829.t1	S16_quant	1270.39	55.5148	3922.87	4095
jgi|Phlrad1|132188|plus.g3829.t1	S17_quant	1380.56	61.9708	3948.57	4095
jgi|Phlrad1|132188|plus.g3829.t1	S18_quant	1428.17	62.5793	3924.98	4095
jgi|Phlrad1|132189|plus.g3830.t1	S13_quant	277.955	149.697	324.913	480
jgi|Phlrad1|132189|plus.g3830.t1	S14_quant	274.572	145.106	335.695	480
jgi|Phlrad1|132189|plus.g3830.t1	S15_quant	324.457	180.137	309.019	480
jgi|Phlrad1|132189|plus.g3830.t1	S16_quant	258.402	143.503	308.683	480
jgi|Phlrad1|132189|plus.g3830.t1	S17_quant	283.264	150.274	334.103	480
jgi|Phlrad1|132189|plus.g3830.t1	S18_quant	273.679	151.435	310.818	480
jgi|Phlrad1|132190|minus.g3795.t1	S13_quant	2.02887	1.26484	280.687	435
jgi|Phlrad1|132190|minus.g3795.t1	S14_quant	1.81236	1.10337	291.406	435
jgi|Phlrad1|132190|minus.g3795.t1	S15_quant	1.07081	0.693073	265.074	435
jgi|Phlrad1|132190|minus.g3795.t1	S16_quant	0	0	264.508	435
jgi|Phlrad1|132190|minus.g3795.t1	S17_quant	0	0	289.784	435
jgi|Phlrad1|132190|minus.g3795.t1	S18_quant	0	0	266.535	435
jgi|Phlrad1|132191|plus.g3832.t1	S13_quant	482.871	45.9502	1838.86	1995
jgi|Phlrad1|132191|plus.g3832.t1	S14_quant	411.405	39.4515	1850.04	1995
jgi|Phlrad1|132191|plus.g3832.t1	S15_quant	398.343	37.4931	1822.79	1995
jgi|Phlrad1|132191|plus.g3832.t1	S16_quant	414.884	39.0164	1822.87	1995
jgi|Phlrad1|132191|plus.g3832.t1	S17_quant	464.892	44.5746	1848.57	1995
jgi|Phlrad1|132191|plus.g3832.t1	S18_quant	440.404	41.5033	1824.98	1995
jgi|Phlrad1|132192|minus.g3797.t1	S13_quant	110.573	20.2849	953.856	1110
jgi|Phlrad1|132192|minus.g3797.t1	S14_quant	110.554	20.3238	965.035	1110
jgi|Phlrad1|132192|minus.g3797.t1	S15_quant	98.5149	18.023	937.795	1110
jgi|Phlrad1|132192|minus.g3797.t1	S16_quant	84.4181	15.4301	937.869	1110
jgi|Phlrad1|132192|minus.g3797.t1	S17_quant	80.9327	14.8871	963.572	1110
jgi|Phlrad1|132192|minus.g3797.t1	S18_quant	75.4977	13.8135	939.981	1110
jgi|Phlrad1|132193|plus.g3834.t1	S13_quant	623.877	173.325	629.856	786
jgi|Phlrad1|132193|plus.g3834.t1	S14_quant	608.951	168.529	641.035	786
jgi|Phlrad1|132193|plus.g3834.t1	S15_quant	631.78	176.594	613.795	786
jgi|Phlrad1|132193|plus.g3834.t1	S16_quant	440.621	123.046	613.869	786
jgi|Phlrad1|132193|plus.g3834.t1	S17_quant	465.833	129.096	639.572	786
jgi|Phlrad1|132193|plus.g3834.t1	S18_quant	495.978	138.479	615.981	786
jgi|Phlrad1|132194|plus.g3835.t1	S13_quant	21.3031	5.24404	710.856	867
jgi|Phlrad1|132194|plus.g3835.t1	S14_quant	18.1236	4.45307	722.035	867
jgi|Phlrad1|132194|plus.g3835.t1	S15_quant	16.0622	3.96626	694.795	867
jgi|Phlrad1|132194|plus.g3835.t1	S16_quant	21.6193	5.33353	694.869	867
jgi|Phlrad1|132194|plus.g3835.t1	S17_quant	25.4091	6.25004	720.572	867
jgi|Phlrad1|132194|plus.g3835.t1	S18_quant	15.7287	3.88116	696.981	867
jgi|Phlrad1|132195|plus.g3836.t1	S13_quant	40.5774	7.97041	890.856	1047
jgi|Phlrad1|132195|plus.g3836.t1	S14_quant	28.0915	5.52492	902.035	1047
jgi|Phlrad1|132195|plus.g3836.t1	S15_quant	40.6909	7.98038	874.795	1047
jgi|Phlrad1|132195|plus.g3836.t1	S16_quant	33.9731	6.65685	874.869	1047
jgi|Phlrad1|132195|plus.g3836.t1	S17_quant	42.3485	8.33472	900.572	1047
jgi|Phlrad1|132195|plus.g3836.t1	S18_quant	33.5546	6.58038	876.981	1047
jgi|Phlrad1|132196|plus.g3837.t1	S13_quant	173.196	37.0113	818.856	975
jgi|Phlrad1|132196|plus.g3837.t1	S14_quant	174.449	37.2861	830.035	975
jgi|Phlrad1|132196|plus.g3837.t1	S15_quant	189.152	40.424	802.795	975
jgi|Phlrad1|132196|plus.g3837.t1	S16_quant	174.671	37.2951	802.869	975
jgi|Phlrad1|132196|plus.g3837.t1	S17_quant	139.013	29.7369	828.572	975
jgi|Phlrad1|132196|plus.g3837.t1	S18_quant	150.662	32.189	804.981	975
jgi|Phlrad1|132197|minus.g3800.t1	S13_quant	34.4908	4.51126	1337.86	1494
jgi|Phlrad1|132197|minus.g3800.t1	S14_quant	64.3386	8.46102	1349.04	1494
jgi|Phlrad1|132197|minus.g3800.t1	S15_quant	54.6115	7.08846	1321.79	1494
jgi|Phlrad1|132197|minus.g3800.t1	S16_quant	46.327	6.00789	1321.87	1494
jgi|Phlrad1|132197|minus.g3800.t1	S17_quant	67.7576	8.91204	1347.57	1494
jgi|Phlrad1|132197|minus.g3800.t1	S18_quant	59.769	7.76398	1323.98	1494
jgi|Phlrad1|132198|plus.g3839.t1	S13_quant	17.2454	5.35132	563.919	720
jgi|Phlrad1|132198|plus.g3839.t1	S14_quant	17.2174	5.31186	575.035	720
jgi|Phlrad1|132198|plus.g3839.t1	S15_quant	9.63733	3.01805	547.85	720
jgi|Phlrad1|132198|plus.g3839.t1	S16_quant	17.5013	5.47609	547.869	720
jgi|Phlrad1|132198|plus.g3839.t1	S17_quant	11.2929	3.48971	573.572	720
jgi|Phlrad1|132198|plus.g3839.t1	S18_quant	13.6315	4.26229	550.036	720
jgi|Phlrad1|132199|plus.g3840.t1	S13_quant	46.664	6.06268	1346.86	1503
jgi|Phlrad1|132199|plus.g3840.t1	S14_quant	59.8077	7.81305	1358.04	1503
jgi|Phlrad1|132199|plus.g3840.t1	S15_quant	43.9034	5.66003	1330.79	1503
jgi|Phlrad1|132199|plus.g3840.t1	S16_quant	47.3565	6.09987	1330.87	1503
jgi|Phlrad1|132199|plus.g3840.t1	S17_quant	32.0526	4.18786	1356.57	1503
jgi|Phlrad1|132199|plus.g3840.t1	S18_quant	55.5747	7.1704	1332.98	1503
jgi|Phlrad1|132200|plus.g3841.t1	S13_quant	50.7217	11.0413	803.856	960
jgi|Phlrad1|132200|plus.g3841.t1	S14_quant	65.2448	14.2018	815.035	960
jgi|Phlrad1|132200|plus.g3841.t1	S15_quant	66.3905	14.4585	787.795	960
jgi|Phlrad1|132200|plus.g3841.t1	S16_quant	51.4745	11.1999	787.869	960
jgi|Phlrad1|132200|plus.g3841.t1	S17_quant	47.0539	10.2511	813.572	960
jgi|Phlrad1|132200|plus.g3841.t1	S18_quant	59.769	13.0122	789.981	960
jgi|Phlrad1|132201|minus.g3803.t1	S13_quant	47.9507	13.579	617.919	774
jgi|Phlrad1|132201|minus.g3803.t1	S14_quant	78.3742	22.1041	629.035	774
jgi|Phlrad1|132201|minus.g3803.t1	S15_quant	78.5512	22.3942	601.795	774
jgi|Phlrad1|132201|minus.g3803.t1	S16_quant	65.2	18.5704	601.869	774
jgi|Phlrad1|132201|minus.g3803.t1	S17_quant	41.6743	11.77	627.572	774
jgi|Phlrad1|132201|minus.g3803.t1	S18_quant	52.7627	15.0243	603.981	774
jgi|Phlrad1|132202|minus.g3804.t1	S13_quant	39.5629	16.364	423.061	579
jgi|Phlrad1|132202|minus.g3804.t1	S14_quant	38.0595	15.5548	434.083	579
jgi|Phlrad1|132202|minus.g3804.t1	S15_quant	55.6823	23.4782	406.898	579
jgi|Phlrad1|132202|minus.g3804.t1	S16_quant	48.386	20.3754	407.089	579
jgi|Phlrad1|132202|minus.g3804.t1	S17_quant	33.8788	13.8788	432.662	579
jgi|Phlrad1|132202|minus.g3804.t1	S18_quant	54.5262	22.9177	409.189	579
jgi|Phlrad1|132203|minus.g3805.t1	S13_quant	96.3102	9.1055	1850.86	2007
jgi|Phlrad1|132203|minus.g3805.t1	S14_quant	76.3813	7.27735	1862.04	2007
jgi|Phlrad1|132203|minus.g3805.t1	S15_quant	108.309	10.1277	1834.79	2007
jgi|Phlrad1|132203|minus.g3805.t1	S16_quant	45.603	4.26054	1834.87	2007
jgi|Phlrad1|132203|minus.g3805.t1	S17_quant	28.915	2.75453	1860.57	2007
jgi|Phlrad1|132203|minus.g3805.t1	S18_quant	29.6067	2.77188	1836.98	2007
jgi|Phlrad1|132204|minus.g3805.t2	S13_quant	173.529	16.3267	1859.86	2016
jgi|Phlrad1|132204|minus.g3805.t2	S14_quant	202.721	19.2217	1871.04	2016
jgi|Phlrad1|132204|minus.g3805.t2	S15_quant	193.66	18.0202	1843.79	2016
jgi|Phlrad1|132204|minus.g3805.t2	S16_quant	199.415	18.5398	1843.87	2016
jgi|Phlrad1|132204|minus.g3805.t2	S17_quant	151.772	14.3887	1869.57	2016
jgi|Phlrad1|132204|minus.g3805.t2	S18_quant	194.789	18.148	1845.98	2016
jgi|Phlrad1|132205|minus.g3806.t1	S13_quant	1676.86	100.943	2906.86	3063
jgi|Phlrad1|132205|minus.g3806.t1	S14_quant	1699.08	103.3	2918.04	3063
jgi|Phlrad1|132205|minus.g3806.t1	S15_quant	1724.01	102.319	2890.79	3063
jgi|Phlrad1|132205|minus.g3806.t1	S16_quant	1465.99	86.9319	2890.87	3063
jgi|Phlrad1|132205|minus.g3806.t1	S17_quant	1088.77	66.166	2916.57	3063
jgi|Phlrad1|132205|minus.g3806.t1	S18_quant	1235.23	73.4329	2892.98	3063
jgi|Phlrad1|132206|minus.g3807.t1	S13_quant	27.3897	18.0151	266.046	420
jgi|Phlrad1|132206|minus.g3807.t1	S14_quant	29.9039	19.1639	276.833	420
jgi|Phlrad1|132206|minus.g3807.t1	S15_quant	28.912	19.8024	250.49	420
jgi|Phlrad1|132206|minus.g3807.t1	S16_quant	26.7667	18.3616	249.897	420
jgi|Phlrad1|132206|minus.g3807.t1	S17_quant	20.7037	13.3298	275.294	420
jgi|Phlrad1|132206|minus.g3807.t1	S18_quant	26.2145	17.8721	252.265	420
jgi|Phlrad1|132207|plus.g3845.t1	S13_quant	40.5774	3.18143	2231.86	2388
jgi|Phlrad1|132207|plus.g3845.t1	S14_quant	51.6521	4.08532	2243.04	2388
jgi|Phlrad1|132207|plus.g3845.t1	S15_quant	47.1158	3.64812	2215.79	2388
jgi|Phlrad1|132207|plus.g3845.t1	S16_quant	39.1206	3.02648	2215.87	2388
jgi|Phlrad1|132207|plus.g3845.t1	S17_quant	25.4091	2.00913	2241.57	2388
jgi|Phlrad1|132207|plus.g3845.t1	S18_quant	33.5546	2.60186	2217.98	2388
jgi|Phlrad1|132208|minus.g3809.t1	S13_quant	469.683	148.913	551.919	708
jgi|Phlrad1|132208|minus.g3809.t1	S14_quant	463.057	145.906	563.035	708
jgi|Phlrad1|132208|minus.g3809.t1	S15_quant	550.398	176.224	535.85	708
jgi|Phlrad1|132208|minus.g3809.t1	S16_quant	455.034	145.567	535.869	708
jgi|Phlrad1|132208|minus.g3809.t1	S17_quant	557.118	175.838	561.572	708
jgi|Phlrad1|132208|minus.g3809.t1	S18_quant	486.541	155.524	538.036	708
jgi|Phlrad1|132209|minus.g3810.t1	S13_quant	10.1443	10.2877	172.548	321
jgi|Phlrad1|132209|minus.g3810.t1	S14_quant	4.53089	4.39024	183.092	321
jgi|Phlrad1|132209|minus.g3810.t1	S15_quant	7.4957	8.12698	158.24	321
jgi|Phlrad1|132209|minus.g3810.t1	S16_quant	6.17693	6.74739	156.933	321
jgi|Phlrad1|132209|minus.g3810.t1	S17_quant	5.64646	5.50757	181.714	321
jgi|Phlrad1|132209|minus.g3810.t1	S18_quant	3.14574	3.38553	159.803	321
jgi|Phlrad1|132210|plus.g3847.t1	S13_quant	245.493	21.8966	1961.86	2118
jgi|Phlrad1|132210|plus.g3847.t1	S14_quant	241.949	21.7552	1973.04	2118
jgi|Phlrad1|132210|plus.g3847.t1	S15_quant	237.721	20.9605	1945.79	2118
jgi|Phlrad1|132210|plus.g3847.t1	S16_quant	280.021	24.6691	1945.87	2118
jgi|Phlrad1|132210|plus.g3847.t1	S17_quant	218.33	19.6278	1971.57	2118
jgi|Phlrad1|132210|plus.g3847.t1	S18_quant	250.611	22.1261	1947.98	2118
jgi|Phlrad1|132211|minus.g3812.t1	S13_quant	90.2847	8.02833	1967.86	2124
jgi|Phlrad1|132211|minus.g3812.t1	S14_quant	106.929	9.58553	1979.04	2124
jgi|Phlrad1|132211|minus.g3812.t1	S15_quant	99.5857	8.75376	1951.79	2124
jgi|Phlrad1|132211|minus.g3812.t1	S16_quant	99.8604	8.77039	1951.87	2124
jgi|Phlrad1|132211|minus.g3812.t1	S17_quant	110.106	9.86848	1977.57	2124
jgi|Phlrad1|132211|minus.g3812.t1	S18_quant	108.004	9.50623	1953.98	2124
jgi|Phlrad1|132212|plus.g3849.t2	S13_quant	0	0	2591.86	2748
jgi|Phlrad1|132212|plus.g3849.t2	S14_quant	28.0291	1.91031	2603.04	2748
jgi|Phlrad1|132212|plus.g3849.t2	S15_quant	60.5381	4.03227	2575.79	2748
jgi|Phlrad1|132212|plus.g3849.t2	S16_quant	38.3899	2.55487	2575.87	2748
jgi|Phlrad1|132212|plus.g3849.t2	S17_quant	7.34e-07	5e-08	2601.57	2748
jgi|Phlrad1|132212|plus.g3849.t2	S18_quant	17.4899	1.1668	2577.98	2748
jgi|Phlrad1|132213|plus.g3849.t1	S13_quant	327.662	22.3025	2570.86	2727
jgi|Phlrad1|132213|plus.g3849.t1	S14_quant	296.383	20.3641	2582.04	2727
jgi|Phlrad1|132213|plus.g3849.t1	S15_quant	312.105	20.9593	2554.79	2727
jgi|Phlrad1|132213|plus.g3849.t1	S16_quant	273.545	18.3543	2554.87	2727
jgi|Phlrad1|132213|plus.g3849.t1	S17_quant	344.434	23.6571	2580.57	2727
jgi|Phlrad1|132213|plus.g3849.t1	S18_quant	321.201	21.6043	2556.98	2727
jgi|Phlrad1|132214|minus.g3814.t1	S13_quant	1773.23	82.3522	3767.86	3924
jgi|Phlrad1|132214|minus.g3814.t1	S14_quant	1806.01	84.784	3779.04	3924
jgi|Phlrad1|132214|minus.g3814.t1	S15_quant	1969.23	90.051	3751.79	3924
jgi|Phlrad1|132214|minus.g3814.t1	S16_quant	1612.18	73.6617	3751.87	3924
jgi|Phlrad1|132214|minus.g3814.t1	S17_quant	1855.8	87.0745	3777.57	3924
jgi|Phlrad1|132214|minus.g3814.t1	S18_quant	1846.55	84.5977	3753.98	3924
jgi|Phlrad1|132215|plus.g3851.t1	S13_quant	169.411	24.5228	1208.86	1365
jgi|Phlrad1|132215|plus.g3851.t1	S14_quant	151.332	22.0055	1220.04	1365
jgi|Phlrad1|132215|plus.g3851.t1	S15_quant	138.135	19.8687	1192.79	1365
jgi|Phlrad1|132215|plus.g3851.t1	S16_quant	147.217	21.1564	1192.87	1365
jgi|Phlrad1|132215|plus.g3851.t1	S17_quant	148.69	21.6273	1218.57	1365
jgi|Phlrad1|132215|plus.g3851.t1	S18_quant	164.627	23.6935	1194.98	1365
jgi|Phlrad1|132216|minus.g3816.t1	S13_quant	45.6495	8.34822	956.856	1113
jgi|Phlrad1|132216|minus.g3816.t1	S14_quant	38.0595	6.97502	968.035	1113
jgi|Phlrad1|132216|minus.g3816.t1	S15_quant	34.2661	6.24886	940.795	1113
jgi|Phlrad1|132216|minus.g3816.t1	S16_quant	46.327	8.44076	940.869	1113
jgi|Phlrad1|132216|minus.g3816.t1	S17_quant	57.4057	10.5267	966.572	1113
jgi|Phlrad1|132216|minus.g3816.t1	S18_quant	37.7489	6.88479	942.981	1113
jgi|Phlrad1|132217|minus.g3817.t1	S13_quant	1906.12	1176.22	283.574	438
jgi|Phlrad1|132217|minus.g3817.t1	S14_quant	1596.69	962.448	294.317	438
jgi|Phlrad1|132217|minus.g3817.t1	S15_quant	1729.36	1107.23	267.967	438
jgi|Phlrad1|132217|minus.g3817.t1	S16_quant	1269.36	813.6	267.455	438
jgi|Phlrad1|132217|minus.g3817.t1	S17_quant	1773.93	1074	292.755	438
jgi|Phlrad1|132217|minus.g3817.t1	S18_quant	1520.44	970.354	269.481	438
jgi|Phlrad1|132218|minus.g3818.t1	S13_quant	116.66	29.7208	686.856	843
jgi|Phlrad1|132218|minus.g3818.t1	S14_quant	85.1807	21.649	698.035	843
jgi|Phlrad1|132218|minus.g3818.t1	S15_quant	99.5857	25.4706	670.795	843
jgi|Phlrad1|132218|minus.g3818.t1	S16_quant	61.7693	15.7838	670.869	843
jgi|Phlrad1|132218|minus.g3818.t1	S17_quant	143.044	36.3977	696.572	843
jgi|Phlrad1|132218|minus.g3818.t1	S18_quant	82.8378	21.1697	672.981	843
jgi|Phlrad1|132219|plus.g3855.t1	S13_quant	322.59	263.615	214.134	366
jgi|Phlrad1|132219|plus.g3855.t1	S14_quant	318.068	250.526	225.238	366
jgi|Phlrad1|132219|plus.g3855.t1	S15_quant	289.12	249.026	199.189	366
jgi|Phlrad1|132219|plus.g3855.t1	S16_quant	391.206	338.044	198.384	366
jgi|Phlrad1|132219|plus.g3855.t1	S17_quant	372.667	295.696	223.381	366
jgi|Phlrad1|132219|plus.g3855.t1	S18_quant	396.363	339.242	200.943	366
jgi|Phlrad1|132220|plus.g3856.t1	S13_quant	1621.07	566.228	500.973	657
jgi|Phlrad1|132220|plus.g3856.t1	S14_quant	1602.12	555.098	512.035	657
jgi|Phlrad1|132220|plus.g3856.t1	S15_quant	1500.21	530.855	484.85	657
jgi|Phlrad1|132220|plus.g3856.t1	S16_quant	2259.73	798.929	484.868	657
jgi|Phlrad1|132220|plus.g3856.t1	S17_quant	1844.51	640.318	510.572	657
jgi|Phlrad1|132220|plus.g3856.t1	S18_quant	2303.73	813.33	487.141	657
jgi|Phlrad1|132221|plus.g3857.t1	S13_quant	60.8661	7.75244	1373.86	1530
jgi|Phlrad1|132221|plus.g3857.t1	S14_quant	47.1212	6.03573	1385.04	1530
jgi|Phlrad1|132221|plus.g3857.t1	S15_quant	74.957	9.47131	1357.79	1530
jgi|Phlrad1|132221|plus.g3857.t1	S16_quant	70.0053	8.8379	1357.87	1530
jgi|Phlrad1|132221|plus.g3857.t1	S17_quant	71.5219	9.16239	1383.57	1530
jgi|Phlrad1|132221|plus.g3857.t1	S18_quant	66.0605	8.35409	1359.98	1530
jgi|Phlrad1|132222|minus.g3822.t1	S13_quant	405.774	61.3244	1157.86	1314
jgi|Phlrad1|132222|minus.g3822.t1	S14_quant	372.439	56.52	1169.04	1314
jgi|Phlrad1|132222|minus.g3822.t1	S15_quant	399.414	60.016	1141.79	1314
jgi|Phlrad1|132222|minus.g3822.t1	S16_quant	432.385	64.9129	1141.87	1314
jgi|Phlrad1|132222|minus.g3822.t1	S17_quant	352.904	53.5728	1167.57	1314
jgi|Phlrad1|132222|minus.g3822.t1	S18_quant	363.857	54.7018	1143.98	1314
jgi|Phlrad1|132223|plus.g3859.t1	S13_quant	352.009	85.213	722.856	879
jgi|Phlrad1|132223|plus.g3859.t1	S14_quant	347.066	83.8821	734.035	879
jgi|Phlrad1|132223|plus.g3859.t1	S15_quant	329.811	80.0578	706.795	879
jgi|Phlrad1|132223|plus.g3859.t1	S16_quant	383.999	93.1254	706.869	879
jgi|Phlrad1|132223|plus.g3859.t1	S17_quant	312.438	75.5935	732.572	879
jgi|Phlrad1|132223|plus.g3859.t1	S18_quant	348.129	84.449	708.981	879
jgi|Phlrad1|132224|plus.g3860.t1	S13_quant	78.1114	18.3013	746.856	903
jgi|Phlrad1|132224|plus.g3860.t1	S14_quant	110.554	25.8737	758.035	903
jgi|Phlrad1|132224|plus.g3860.t1	S15_quant	101.727	23.8822	730.795	903
jgi|Phlrad1|132224|plus.g3860.t1	S16_quant	159.571	37.4274	730.869	903
jgi|Phlrad1|132224|plus.g3860.t1	S17_quant	128.928	30.2042	756.572	903
jgi|Phlrad1|132224|plus.g3860.t1	S18_quant	130.024	30.5085	732.981	903
jgi|Phlrad1|132225|minus.g3825.t1	S13_quant	79.1259	15.6477	884.856	1041
jgi|Phlrad1|132225|minus.g3825.t1	S14_quant	91.524	18.1211	896.035	1041
jgi|Phlrad1|132225|minus.g3825.t1	S15_quant	97.4441	19.2429	868.795	1041
jgi|Phlrad1|132225|minus.g3825.t1	S16_quant	98.831	19.4991	868.869	1041
jgi|Phlrad1|132225|minus.g3825.t1	S17_quant	91.2845	18.0864	894.572	1041
jgi|Phlrad1|132225|minus.g3825.t1	S18_quant	76.5463	15.1149	870.981	1041
jgi|Phlrad1|132226|plus.g3862.t1	S13_quant	23.332	3.09335	1319.86	1476
jgi|Phlrad1|132226|plus.g3862.t1	S14_quant	23.5606	3.1403	1331.04	1476
jgi|Phlrad1|132226|plus.g3862.t1	S15_quant	14.9914	1.97272	1303.79	1476
jgi|Phlrad1|132226|plus.g3862.t1	S16_quant	18.5308	2.43633	1303.87	1476
jgi|Phlrad1|132226|plus.g3862.t1	S17_quant	26.3502	3.51272	1329.57	1476
jgi|Phlrad1|132226|plus.g3862.t1	S18_quant	20.9716	2.76175	1305.98	1476
jgi|Phlrad1|132227|minus.g3827.t1	S13_quant	507.341	87.5644	1013.86	1170
jgi|Phlrad1|132227|minus.g3827.t1	S14_quant	656.979	113.707	1025.04	1170
jgi|Phlrad1|132227|minus.g3827.t1	S15_quant	516.132	88.7466	997.795	1170
jgi|Phlrad1|132227|minus.g3827.t1	S16_quant	870.948	149.622	997.869	1170
jgi|Phlrad1|132227|minus.g3827.t1	S17_quant	504.417	87.346	1023.57	1170
jgi|Phlrad1|132227|minus.g3827.t1	S18_quant	909.119	156.357	999.981	1170
jgi|Phlrad1|132228|minus.g3828.t1	S13_quant	17.2454	15.5124	194.536	345
jgi|Phlrad1|132228|minus.g3828.t1	S14_quant	12.6865	10.9591	205.372	345
jgi|Phlrad1|132228|minus.g3828.t1	S15_quant	12.8498	12.2697	179.678	345
jgi|Phlrad1|132228|minus.g3828.t1	S16_quant	16.4718	15.7954	178.767	345
jgi|Phlrad1|132228|minus.g3828.t1	S17_quant	21.6448	18.8345	203.691	345
jgi|Phlrad1|132228|minus.g3828.t1	S18_quant	14.6801	13.9201	181.374	345
jgi|Phlrad1|132229|minus.g3829.t1	S13_quant	474.755	36.729	2261.86	2418
jgi|Phlrad1|132229|minus.g3829.t1	S14_quant	484.805	37.8386	2273.04	2418
jgi|Phlrad1|132229|minus.g3829.t1	S15_quant	462.592	35.3394	2245.79	2418
jgi|Phlrad1|132229|minus.g3829.t1	S16_quant	500.332	38.19	2245.87	2418
jgi|Phlrad1|132229|minus.g3829.t1	S17_quant	455.481	35.5399	2271.57	2418
jgi|Phlrad1|132229|minus.g3829.t1	S18_quant	541.067	41.395	2247.98	2418
jgi|Phlrad1|132230|minus.g3830.t1	S13_quant	465.625	34.381	2369.86	2526
jgi|Phlrad1|132230|minus.g3830.t1	S14_quant	511.084	38.0803	2381.04	2526
jgi|Phlrad1|132230|minus.g3830.t1	S15_quant	495.787	36.1375	2353.79	2526
jgi|Phlrad1|132230|minus.g3830.t1	S16_quant	310.906	22.6424	2353.87	2526
jgi|Phlrad1|132230|minus.g3830.t1	S17_quant	415.956	30.9828	2379.57	2526
jgi|Phlrad1|132230|minus.g3830.t1	S18_quant	389.023	28.3984	2355.98	2526
jgi|Phlrad1|132231|plus.g3866.t2	S13_quant	522.172	63.9931	1427.86	1584
jgi|Phlrad1|132231|plus.g3866.t2	S14_quant	434.987	53.6265	1439.04	1584
jgi|Phlrad1|132231|plus.g3866.t2	S15_quant	592.941	72.0563	1411.79	1584
jgi|Phlrad1|132231|plus.g3866.t2	S16_quant	539.674	65.526	1411.87	1584
jgi|Phlrad1|132231|plus.g3866.t2	S17_quant	488.984	60.2888	1437.57	1584
jgi|Phlrad1|132231|plus.g3866.t2	S18_quant	539.699	65.6444	1413.98	1584
jgi|Phlrad1|132232|plus.g3866.t1	S13_quant	989.335	120.991	1430.86	1587
jgi|Phlrad1|132232|plus.g3866.t1	S14_quant	971.401	119.508	1442.04	1587
jgi|Phlrad1|132232|plus.g3866.t1	S15_quant	863.366	104.697	1414.79	1587
jgi|Phlrad1|132232|plus.g3866.t1	S16_quant	1018.97	123.459	1414.87	1587
jgi|Phlrad1|132232|plus.g3866.t1	S17_quant	927.337	114.097	1440.57	1587
jgi|Phlrad1|132232|plus.g3866.t1	S18_quant	993.325	120.564	1416.98	1587
jgi|Phlrad1|132233|minus.g3832.t1	S13_quant	74.0537	13.7584	941.856	1098
jgi|Phlrad1|132233|minus.g3832.t1	S14_quant	87.8992	16.3625	953.035	1098
jgi|Phlrad1|132233|minus.g3832.t1	S15_quant	59.9656	11.1127	925.795	1098
jgi|Phlrad1|132233|minus.g3832.t1	S16_quant	84.4181	15.6301	925.869	1098
jgi|Phlrad1|132233|minus.g3832.t1	S17_quant	51.7593	9.6409	951.572	1098
jgi|Phlrad1|132233|minus.g3832.t1	S18_quant	69.2063	12.8261	927.981	1098
jgi|Phlrad1|132234|minus.g3833.t1	S13_quant	1395.86	63.2158	3863.86	4020
jgi|Phlrad1|132234|minus.g3833.t1	S14_quant	1371.95	62.8113	3875.04	4020
jgi|Phlrad1|132234|minus.g3833.t1	S15_quant	1575.17	70.2339	3847.79	4020
jgi|Phlrad1|132234|minus.g3833.t1	S16_quant	1610.12	71.7322	3847.87	4020
jgi|Phlrad1|132234|minus.g3833.t1	S17_quant	2004.49	91.7202	3873.57	4020
jgi|Phlrad1|132234|minus.g3833.t1	S18_quant	1729.11	77.242	3849.98	4020
jgi|Phlrad1|132235|plus.g3869.t1	S13_quant	172.454	78.5239	384.305	540
jgi|Phlrad1|132235|plus.g3869.t1	S14_quant	167.643	75.2163	395.41	540
jgi|Phlrad1|132235|plus.g3869.t1	S15_quant	180.968	84.3046	368.283	540
jgi|Phlrad1|132235|plus.g3869.t1	S16_quant	190.455	88.6702	368.207	540
jgi|Phlrad1|132235|plus.g3869.t1	S17_quant	157.16	70.7376	393.788	540
jgi|Phlrad1|132235|plus.g3869.t1	S18_quant	147.85	68.6675	370.305	540
jgi|Phlrad1|132236|plus.g3870.t1	S13_quant	96.3713	53.8707	313.04	468
jgi|Phlrad1|132236|plus.g3870.t1	S14_quant	100.586	55.1004	323.859	468
jgi|Phlrad1|132236|plus.g3870.t1	S15_quant	108.152	62.4272	297.23	468
jgi|Phlrad1|132236|plus.g3870.t1	S16_quant	158.541	91.5597	296.834	468
jgi|Phlrad1|132236|plus.g3870.t1	S17_quant	138.338	76.085	322.267	468
jgi|Phlrad1|132236|plus.g3870.t1	S18_quant	184.55	106.164	298.97	468
jgi|Phlrad1|132237|plus.g3871.t1	S13_quant	943.424	100.243	1646.86	1803
jgi|Phlrad1|132237|plus.g3871.t1	S14_quant	958.736	102.584	1658.04	1803
jgi|Phlrad1|132237|plus.g3871.t1	S15_quant	950.883	100.037	1630.79	1803
jgi|Phlrad1|132237|plus.g3871.t1	S16_quant	1270.39	133.535	1630.87	1803
jgi|Phlrad1|132237|plus.g3871.t1	S17_quant	1119.88	119.821	1656.57	1803
jgi|Phlrad1|132237|plus.g3871.t1	S18_quant	1161.83	122.363	1632.98	1803
jgi|Phlrad1|132238|plus.g3872.t1	S13_quant	2056.26	58.2808	6173.86	6330
jgi|Phlrad1|132238|plus.g3872.t1	S14_quant	2392.31	68.6198	6185.04	6330
jgi|Phlrad1|132238|plus.g3872.t1	S15_quant	2650.27	73.8407	6157.79	6330
jgi|Phlrad1|132238|plus.g3872.t1	S16_quant	2305.03	64.1684	6157.87	6330
jgi|Phlrad1|132238|plus.g3872.t1	S17_quant	2238.82	64.1729	6183.57	6330
jgi|Phlrad1|132238|plus.g3872.t1	S18_quant	2435.85	68.0082	6159.98	6330
jgi|Phlrad1|132239|minus.g3838.t1	S13_quant	336.792	22.8174	2582.86	2739
jgi|Phlrad1|132239|minus.g3838.t1	S14_quant	345.254	23.6122	2594.04	2739
jgi|Phlrad1|132239|minus.g3838.t1	S15_quant	356.581	23.8341	2566.79	2739
jgi|Phlrad1|132239|minus.g3838.t1	S16_quant	397.383	26.5388	2566.87	2739
jgi|Phlrad1|132239|minus.g3838.t1	S17_quant	346.316	23.6763	2592.57	2739
jgi|Phlrad1|132239|minus.g3838.t1	S18_quant	427.821	28.6412	2568.98	2739
jgi|Phlrad1|132240|plus.g3874.t1	S13_quant	17.2454	2.70439	1115.86	1272
jgi|Phlrad1|132240|plus.g3874.t1	S14_quant	25.373	3.994	1127.04	1272
jgi|Phlrad1|132240|plus.g3874.t1	S15_quant	25.6995	4.00909	1099.79	1272
jgi|Phlrad1|132240|plus.g3874.t1	S16_quant	25.7372	4.01141	1099.87	1272
jgi|Phlrad1|132240|plus.g3874.t1	S17_quant	22.5859	3.5566	1125.57	1272
jgi|Phlrad1|132240|plus.g3874.t1	S18_quant	16.7773	2.61841	1101.98	1272
jgi|Phlrad1|132241|plus.g3875.t1	S13_quant	334.763	46.0579	1271.86	1428
jgi|Phlrad1|132241|plus.g3875.t1	S14_quant	325.318	44.9825	1283.04	1428
jgi|Phlrad1|132241|plus.g3875.t1	S15_quant	318.032	43.4494	1255.79	1428
jgi|Phlrad1|132241|plus.g3875.t1	S16_quant	345.908	47.2164	1255.87	1428
jgi|Phlrad1|132241|plus.g3875.t1	S17_quant	300.204	41.5188	1281.57	1428
jgi|Phlrad1|132241|plus.g3875.t1	S18_quant	356.517	48.7412	1257.98	1428
jgi|Phlrad1|132242|plus.g3876.t1	S13_quant	1476	249.581	1034.86	1191
jgi|Phlrad1|132242|plus.g3876.t1	S14_quant	1415.45	240.061	1046.04	1191
jgi|Phlrad1|132242|plus.g3876.t1	S15_quant	1532.34	258.047	1018.79	1191
jgi|Phlrad1|132242|plus.g3876.t1	S16_quant	1388.78	233.664	1018.87	1191
jgi|Phlrad1|132242|plus.g3876.t1	S17_quant	1746.64	296.371	1044.57	1191
jgi|Phlrad1|132242|plus.g3876.t1	S18_quant	1499.47	252.586	1020.98	1191
jgi|Phlrad1|132243|minus.g3842.t1	S13_quant	118.689	20.1277	1031.86	1188
jgi|Phlrad1|132243|minus.g3842.t1	S14_quant	103.304	17.5709	1043.04	1188
jgi|Phlrad1|132243|minus.g3842.t1	S15_quant	88.8776	15.0113	1015.79	1188
jgi|Phlrad1|132243|minus.g3842.t1	S16_quant	116.332	19.6308	1015.87	1188
jgi|Phlrad1|132243|minus.g3842.t1	S17_quant	106.342	18.0961	1041.57	1188
jgi|Phlrad1|132243|minus.g3842.t1	S18_quant	96.4693	16.2982	1017.98	1188
jgi|Phlrad1|132244|plus.g3878.t1	S13_quant	607.646	44.8676	2369.86	2526
jgi|Phlrad1|132244|plus.g3878.t1	S14_quant	558.205	41.5913	2381.04	2526
jgi|Phlrad1|132244|plus.g3878.t1	S15_quant	600.727	43.7865	2353.79	2526
jgi|Phlrad1|132244|plus.g3878.t1	S16_quant	596.074	43.4104	2353.87	2526
jgi|Phlrad1|132244|plus.g3878.t1	S17_quant	648.402	48.2967	2379.57	2526
jgi|Phlrad1|132244|plus.g3878.t1	S18_quant	676.334	49.3718	2355.98	2526
jgi|Phlrad1|132245|minus.g3844.t1	S13_quant	254.623	32.9344	1352.86	1509
jgi|Phlrad1|132245|minus.g3844.t1	S14_quant	263.698	34.2969	1364.04	1509
jgi|Phlrad1|132245|minus.g3844.t1	S15_quant	263.42	33.8078	1336.79	1509
jgi|Phlrad1|132245|minus.g3844.t1	S16_quant	243.989	31.2865	1336.87	1509
jgi|Phlrad1|132245|minus.g3844.t1	S17_quant	226.8	29.5022	1362.57	1509
jgi|Phlrad1|132245|minus.g3844.t1	S18_quant	249.562	32.0549	1338.98	1509
jgi|Phlrad1|132246|minus.g3845.t1	S13_quant	121.732	13.5777	1568.86	1725
jgi|Phlrad1|132246|minus.g3845.t1	S14_quant	149.519	16.7882	1580.04	1725
jgi|Phlrad1|132246|minus.g3845.t1	S15_quant	127.427	14.0792	1552.79	1725
jgi|Phlrad1|132246|minus.g3845.t1	S16_quant	129.716	14.3197	1552.87	1725
jgi|Phlrad1|132246|minus.g3845.t1	S17_quant	141.162	15.8498	1578.57	1725
jgi|Phlrad1|132246|minus.g3845.t1	S18_quant	123.732	13.6851	1554.98	1725
jgi|Phlrad1|132247|minus.g3846.t1	S13_quant	34.0463	41.555	143.368	288
jgi|Phlrad1|132247|minus.g3846.t1	S14_quant	28.06	32.3384	153.937	288
jgi|Phlrad1|132247|minus.g3846.t1	S15_quant	49.7149	65.2798	130.659	288
jgi|Phlrad1|132247|minus.g3846.t1	S16_quant	18.9143	25.344	127.936	288
jgi|Phlrad1|132247|minus.g3846.t1	S17_quant	29.8378	34.6017	152.841	288
jgi|Phlrad1|132247|minus.g3846.t1	S18_quant	24.1173	31.5907	131.299	288
jgi|Phlrad1|132248|plus.g3880.t1	S13_quant	3.48773	7.10616	85.8839	213
jgi|Phlrad1|132248|plus.g3880.t1	S14_quant	9.09327	17.0269	94.7455	213
jgi|Phlrad1|132248|plus.g3880.t1	S15_quant	4.89658	10.9095	77.0049	213
jgi|Phlrad1|132248|plus.g3880.t1	S16_quant	4.7639	11.5856	70.4887	213
jgi|Phlrad1|132248|plus.g3880.t1	S17_quant	15.3339	29.3325	92.656	213
jgi|Phlrad1|132248|plus.g3880.t1	S18_quant	8.38864	19.1544	75.3204	213
jgi|Phlrad1|132249|plus.g3881.t1	S13_quant	231.291	24.8932	1625.86	1782
jgi|Phlrad1|132249|plus.g3881.t1	S14_quant	183.954	19.9354	1637.04	1782
jgi|Phlrad1|132249|plus.g3881.t1	S15_quant	163.835	17.4609	1609.79	1782
jgi|Phlrad1|132249|plus.g3881.t1	S16_quant	200.75	21.3768	1609.87	1782
jgi|Phlrad1|132249|plus.g3881.t1	S17_quant	182.569	19.7847	1635.57	1782
jgi|Phlrad1|132249|plus.g3881.t1	S18_quant	224.396	23.9412	1611.98	1782
jgi|Phlrad1|132250|minus.g3848.t1	S13_quant	119.703	14.2798	1466.86	1623
jgi|Phlrad1|132250|minus.g3848.t1	S14_quant	110.554	13.2697	1478.04	1623
jgi|Phlrad1|132250|minus.g3848.t1	S15_quant	108.152	12.7897	1450.79	1623
jgi|Phlrad1|132250|minus.g3848.t1	S16_quant	137.952	16.2995	1450.87	1623
jgi|Phlrad1|132250|minus.g3848.t1	S17_quant	99.7542	11.9742	1476.57	1623
jgi|Phlrad1|132250|minus.g3848.t1	S18_quant	131.072	15.5146	1452.98	1623
jgi|Phlrad1|132251|minus.g3849.t1	S13_quant	96.0872	6.66465	2522.86	2679
jgi|Phlrad1|132251|minus.g3849.t1	S14_quant	111.38	7.79774	2534.04	2679
jgi|Phlrad1|132251|minus.g3849.t1	S15_quant	72.5085	4.96251	2506.79	2679
jgi|Phlrad1|132251|minus.g3849.t1	S16_quant	71.5599	4.89344	2506.87	2679
jgi|Phlrad1|132251|minus.g3849.t1	S17_quant	66.2376	4.63569	2532.57	2679
jgi|Phlrad1|132251|minus.g3849.t1	S18_quant	118.173	8.10047	2508.98	2679
jgi|Phlrad1|132252|minus.g3849.t2	S13_quant	240.396	16.3626	2570.86	2727
jgi|Phlrad1|132252|minus.g3849.t2	S14_quant	287.197	19.733	2582.04	2727
jgi|Phlrad1|132252|minus.g3849.t2	S15_quant	196.475	13.1942	2554.79	2727
jgi|Phlrad1|132252|minus.g3849.t2	S16_quant	291.268	19.5434	2554.87	2727
jgi|Phlrad1|132252|minus.g3849.t2	S17_quant	279.564	19.2016	2580.57	2727
jgi|Phlrad1|132252|minus.g3849.t2	S18_quant	259.605	17.4612	2556.98	2727
jgi|Phlrad1|132253|minus.g3849.t3	S13_quant	157.546	10.711	2573.86	2730
jgi|Phlrad1|132253|minus.g3849.t3	S14_quant	52.6992	3.61669	2585.04	2730
jgi|Phlrad1|132253|minus.g3849.t3	S15_quant	211.812	14.2075	2557.79	2730
jgi|Phlrad1|132253|minus.g3849.t3	S16_quant	105.589	7.07648	2557.87	2730
jgi|Phlrad1|132253|minus.g3849.t3	S17_quant	136.03	9.33222	2583.57	2730
jgi|Phlrad1|132253|minus.g3849.t3	S18_quant	127.638	8.57495	2559.98	2730
jgi|Phlrad1|132254|plus.g3884.t1	S13_quant	206.945	27.4992	1316.86	1473
jgi|Phlrad1|132254|plus.g3884.t1	S14_quant	205.702	27.4792	1328.04	1473
jgi|Phlrad1|132254|plus.g3884.t1	S15_quant	223.8	29.5178	1300.79	1473
jgi|Phlrad1|132254|plus.g3884.t1	S16_quant	224.429	29.5747	1300.87	1473
jgi|Phlrad1|132254|plus.g3884.t1	S17_quant	183.51	24.5189	1326.57	1473
jgi|Phlrad1|132254|plus.g3884.t1	S18_quant	198.182	26.1586	1302.98	1473
jgi|Phlrad1|132255|minus.g3851.t1	S13_quant	50.7217	52.2835	169.759	318
jgi|Phlrad1|132255|minus.g3851.t1	S14_quant	88.8054	87.3008	180.466	318
jgi|Phlrad1|132255|minus.g3851.t1	S15_quant	64.2489	70.8118	155.665	318
jgi|Phlrad1|132255|minus.g3851.t1	S16_quant	112.214	124.666	154.303	318
jgi|Phlrad1|132255|minus.g3851.t1	S17_quant	51.7593	51.2219	179.104	318
jgi|Phlrad1|132255|minus.g3851.t1	S18_quant	87.0321	95.2684	157.116	318
jgi|Phlrad1|132256|minus.g3852.t1	S13_quant	495.044	25.3748	3413.86	3570
jgi|Phlrad1|132256|minus.g3852.t1	S14_quant	526.489	27.2709	3425.04	3570
jgi|Phlrad1|132256|minus.g3852.t1	S15_quant	562.177	28.3863	3397.79	3570
jgi|Phlrad1|132256|minus.g3852.t1	S16_quant	632.106	31.8904	3397.87	3570
jgi|Phlrad1|132256|minus.g3852.t1	S17_quant	608.877	31.5226	3423.57	3570
jgi|Phlrad1|132256|minus.g3852.t1	S18_quant	640.682	32.4083	3399.98	3570
jgi|Phlrad1|132257|plus.g3886.t1	S13_quant	223.176	66.766	584.919	741
jgi|Phlrad1|132257|plus.g3886.t1	S14_quant	223.826	66.6212	596.035	741
jgi|Phlrad1|132257|plus.g3886.t1	S15_quant	231.296	69.7661	568.795	741
jgi|Phlrad1|132257|plus.g3886.t1	S16_quant	252.225	76.0067	568.869	741
jgi|Phlrad1|132257|plus.g3886.t1	S17_quant	255.032	76.0259	594.572	741
jgi|Phlrad1|132257|plus.g3886.t1	S18_quant	207.619	62.5367	570.981	741
jgi|Phlrad1|132258|plus.g3887.t1	S13_quant	26.3753	2.5181	1832.86	1989
jgi|Phlrad1|132258|plus.g3887.t1	S14_quant	19.0297	1.83079	1844.04	1989
jgi|Phlrad1|132258|plus.g3887.t1	S15_quant	13.9206	1.31457	1816.79	1989
jgi|Phlrad1|132258|plus.g3887.t1	S16_quant	19.5603	1.84556	1816.87	1989
jgi|Phlrad1|132258|plus.g3887.t1	S17_quant	20.7037	1.99157	1842.57	1989
jgi|Phlrad1|132258|plus.g3887.t1	S18_quant	18.8744	1.78458	1818.98	1989
jgi|Phlrad1|132259|plus.g3888.t1	S13_quant	125.79	81.8216	269.019	423
jgi|Phlrad1|132259|plus.g3888.t1	S14_quant	144.082	91.3726	279.749	423
jgi|Phlrad1|132259|plus.g3888.t1	S15_quant	128.498	86.9954	253.414	423
jgi|Phlrad1|132259|plus.g3888.t1	S16_quant	122.509	83.0675	252.821	423
jgi|Phlrad1|132259|plus.g3888.t1	S17_quant	67.7576	43.1631	278.238	423
jgi|Phlrad1|132259|plus.g3888.t1	S18_quant	123.732	83.4231	255.086	423
jgi|Phlrad1|132260|minus.g3855.t1	S13_quant	3166.05	244.29	2267.86	2424
jgi|Phlrad1|132260|minus.g3855.t1	S14_quant	2952.33	229.82	2279.04	2424
jgi|Phlrad1|132260|minus.g3855.t1	S15_quant	3561.53	271.356	2251.79	2424
jgi|Phlrad1|132260|minus.g3855.t1	S16_quant	1429.96	108.857	2251.87	2424
jgi|Phlrad1|132260|minus.g3855.t1	S17_quant	3305.06	257.205	2277.57	2424
jgi|Phlrad1|132260|minus.g3855.t1	S18_quant	1948.26	148.657	2253.98	2424
jgi|Phlrad1|132261|minus.g3856.t1	S13_quant	125.79	26.9796	815.856	972
jgi|Phlrad1|132261|minus.g3856.t1	S14_quant	118.709	25.4645	827.035	972
jgi|Phlrad1|132261|minus.g3856.t1	S15_quant	127.427	27.3347	799.795	972
jgi|Phlrad1|132261|minus.g3856.t1	S16_quant	111.185	23.8288	799.869	972
jgi|Phlrad1|132261|minus.g3856.t1	S17_quant	107.283	23.0328	825.572	972
jgi|Phlrad1|132261|minus.g3856.t1	S18_quant	100.664	21.5873	801.981	972
jgi|Phlrad1|132262|minus.g3857.t1	S13_quant	41.5658	17.9509	405.186	561
jgi|Phlrad1|132262|minus.g3857.t1	S14_quant	47.4872	20.2455	416.124	561
jgi|Phlrad1|132262|minus.g3857.t1	S15_quant	58.8948	25.9715	389.056	561
jgi|Phlrad1|132262|minus.g3857.t1	S16_quant	22.5823	9.94735	389.168	561
jgi|Phlrad1|132262|minus.g3857.t1	S17_quant	49.8333	21.2944	414.788	561
jgi|Phlrad1|132262|minus.g3857.t1	S18_quant	38.3481	16.8579	391.228	561
jgi|Phlrad1|132263|minus.g3858.t1	S13_quant	148.424	24.1185	1076.86	1233
jgi|Phlrad1|132263|minus.g3858.t1	S14_quant	129.347	21.0905	1088.04	1233
jgi|Phlrad1|132263|minus.g3858.t1	S15_quant	121.518	19.6536	1060.79	1233
jgi|Phlrad1|132263|minus.g3858.t1	S16_quant	111.185	17.9664	1060.87	1233
jgi|Phlrad1|132263|minus.g3858.t1	S17_quant	126.516	20.6376	1086.57	1233
jgi|Phlrad1|132263|minus.g3858.t1	S18_quant	97.0246	15.6981	1062.98	1233
jgi|Phlrad1|132264|minus.g3859.t1	S13_quant	141.549	15.8791	1559.86	1716
jgi|Phlrad1|132264|minus.g3859.t1	S14_quant	131.095	14.8038	1571.04	1716
jgi|Phlrad1|132264|minus.g3859.t1	S15_quant	150.187	16.6907	1543.79	1716
jgi|Phlrad1|132264|minus.g3859.t1	S16_quant	94.3865	10.4803	1543.87	1716
jgi|Phlrad1|132264|minus.g3859.t1	S17_quant	132.483	14.9606	1569.57	1716
jgi|Phlrad1|132264|minus.g3859.t1	S18_quant	114.551	12.7433	1545.98	1716
jgi|Phlrad1|132265|minus.g3860.t1	S13_quant	1361.37	140.307	1697.86	1854
jgi|Phlrad1|132265|minus.g3860.t1	S14_quant	1332.08	138.278	1709.04	1854
jgi|Phlrad1|132265|minus.g3860.t1	S15_quant	1387.78	141.572	1681.79	1854
jgi|Phlrad1|132265|minus.g3860.t1	S16_quant	1088.17	110.913	1681.87	1854
jgi|Phlrad1|132265|minus.g3860.t1	S17_quant	1210.23	125.62	1707.57	1854
jgi|Phlrad1|132265|minus.g3860.t1	S18_quant	1071.65	109.447	1683.98	1854
jgi|Phlrad1|132266|plus.g3894.t1	S13_quant	954.583	137.837	1211.86	1368
jgi|Phlrad1|132266|plus.g3894.t1	S14_quant	877.18	127.24	1223.04	1368
jgi|Phlrad1|132266|plus.g3894.t1	S15_quant	789.19	113.229	1195.79	1368
jgi|Phlrad1|132266|plus.g3894.t1	S16_quant	793.736	113.781	1195.87	1368
jgi|Phlrad1|132266|plus.g3894.t1	S17_quant	844.146	122.481	1221.57	1368
jgi|Phlrad1|132266|plus.g3894.t1	S18_quant	761.269	109.289	1197.98	1368
jgi|Phlrad1|132267|plus.g3895.t1	S13_quant	4.05774	1.56753	452.973	609
jgi|Phlrad1|132267|plus.g3895.t1	S14_quant	4.53089	1.73206	464.083	609
jgi|Phlrad1|132267|plus.g3895.t1	S15_quant	2.14163	0.841	436.898	609
jgi|Phlrad1|132267|plus.g3895.t1	S16_quant	1.02949	0.403882	436.962	609
jgi|Phlrad1|132267|plus.g3895.t1	S17_quant	1.88215	0.721186	462.572	609
jgi|Phlrad1|132267|plus.g3895.t1	S18_quant	2.09716	0.82124	439.189	609
jgi|Phlrad1|132268|plus.g3896.t1	S13_quant	5.07217	8.81126	100.73	234
jgi|Phlrad1|132268|plus.g3896.t1	S14_quant	2.71853	4.38792	109.913	234
jgi|Phlrad1|132268|plus.g3896.t1	S15_quant	3.21244	6.06864	90.8188	234
jgi|Phlrad1|132268|plus.g3896.t1	S16_quant	2.05898	4.13649	85.3288	234
jgi|Phlrad1|132268|plus.g3896.t1	S17_quant	1.88215	3.0825	108.224	234
jgi|Phlrad1|132268|plus.g3896.t1	S18_quant	4.19432	8.02575	89.8805	234
jgi|Phlrad1|132269|plus.g3897.t1	S13_quant	5.07217	1.81515	488.973	645
jgi|Phlrad1|132269|plus.g3897.t1	S14_quant	18.1236	6.43009	500.035	645
jgi|Phlrad1|132269|plus.g3897.t1	S15_quant	16.0622	5.82733	472.898	645
jgi|Phlrad1|132269|plus.g3897.t1	S16_quant	11.3244	4.10493	472.917	645
jgi|Phlrad1|132269|plus.g3897.t1	S17_quant	5.64646	2.00734	498.572	645
jgi|Phlrad1|132269|plus.g3897.t1	S18_quant	7.34006	2.65658	475.189	645
jgi|Phlrad1|132270|plus.g3898.t1	S13_quant	0	0	336.515	492
jgi|Phlrad1|132270|plus.g3898.t1	S14_quant	0.906178	0.462553	347.557	492
jgi|Phlrad1|132270|plus.g3898.t1	S15_quant	0	0	320.83	492
jgi|Phlrad1|132270|plus.g3898.t1	S16_quant	0	0	320.651	492
jgi|Phlrad1|132270|plus.g3898.t1	S17_quant	1.88215	0.964346	345.934	492
jgi|Phlrad1|132270|plus.g3898.t1	S18_quant	0	0	322.755	492
jgi|Phlrad1|132271|minus.g3864.t1	S13_quant	57.8228	7.25394	1394.86	1551
jgi|Phlrad1|132271|minus.g3864.t1	S14_quant	69.7757	8.80404	1406.04	1551
jgi|Phlrad1|132271|minus.g3864.t1	S15_quant	68.5321	8.52759	1378.79	1551
jgi|Phlrad1|132271|minus.g3864.t1	S16_quant	71.0347	8.83129	1378.87	1551
jgi|Phlrad1|132271|minus.g3864.t1	S17_quant	56.4646	7.12531	1404.57	1551
jgi|Phlrad1|132271|minus.g3864.t1	S18_quant	61.8662	7.7047	1380.98	1551
jgi|Phlrad1|132272|plus.g3900.t1	S13_quant	396.644	23.0677	3008.86	3165
jgi|Phlrad1|132272|plus.g3900.t1	S14_quant	387.844	22.7834	3020.04	3165
jgi|Phlrad1|132272|plus.g3900.t1	S15_quant	349.085	20.0118	2992.79	3165
jgi|Phlrad1|132272|plus.g3900.t1	S16_quant	378.852	21.6999	2992.87	3165
jgi|Phlrad1|132272|plus.g3900.t1	S17_quant	351.963	20.6665	3018.57	3165
jgi|Phlrad1|132272|plus.g3900.t1	S18_quant	339.74	19.5093	2994.98	3165
jgi|Phlrad1|132273|plus.g3901.t1	S13_quant	124.775	17.4135	1253.86	1410
jgi|Phlrad1|132273|plus.g3901.t1	S14_quant	161.3	22.6206	1265.04	1410
jgi|Phlrad1|132273|plus.g3901.t1	S15_quant	176.684	24.4896	1237.79	1410
jgi|Phlrad1|132273|plus.g3901.t1	S16_quant	120.45	16.6805	1237.87	1410
jgi|Phlrad1|132273|plus.g3901.t1	S17_quant	166.571	23.3652	1263.57	1410
jgi|Phlrad1|132273|plus.g3901.t1	S18_quant	163.578	22.6882	1239.98	1410
jgi|Phlrad1|132274|minus.g3867.t1	S13_quant	44.6351	11.1284	701.856	858
jgi|Phlrad1|132274|minus.g3867.t1	S14_quant	34.4348	8.56762	713.035	858
jgi|Phlrad1|132274|minus.g3867.t1	S15_quant	31.0536	7.76873	685.795	858
jgi|Phlrad1|132274|minus.g3867.t1	S16_quant	66.9168	16.7252	685.869	858
jgi|Phlrad1|132274|minus.g3867.t1	S17_quant	51.7593	12.8926	711.572	858
[truncated: 86,197 more rows]
